# Supplementary material for: Modeling the Morphometric Evolution of the Maize Shoot Apical Meristem
Source: Front Plant Sci. 2016 Nov 4;7:1651. doi: 10.3389/fpls.2016.01651 (PMC5095129; doi:10.3389/fpls.2016.01651)
Supplement: Supplementary file 5 [file Data_Sheet_5.xlsx]

## Sheet: BLUP+coeff
Heritabililty	0.45426	0.281924	0.174842
Genotype	PC1_BLUP	PC2_BLUP	PC3_BLUP
MR0001	-0.00332407	-0.00139472	0.00266114
MR0003	0.00194893	-0.000424701	0.00030917
MR0004	0.0146703	0.00571255	-0.000333046
MR0005	-0.00187411	-0.00763084	0.00182639
MR0006	-0.00194532	-0.000197649	0.000829859
MR0007	0.0219264	0.00276936	-0.000441928
MR0008	0.00528252	-0.00170331	-0.001026
MR0009	-0.0329774	0.00669525	-0.00141266
MR0011	0.00423852	-0.00156358	0.000738714
MR0014	-0.0185243	0.00207574	0.000337768
MR0015	-0.000963051	-6.42146e-05	-0.000512699
MR0016	-0.0223872	0.0019776	-0.00153006
MR0018	-0.00281678	-0.000256697	-0.000252905
MR0020	0.0181169	0.00404851	-0.000501736
MR0022	0.0276393	-0.00366753	0.00125255
MR0024	-0.00144369	-0.00140744	-0.000630077
MR0025	-0.0215065	-0.00539263	-0.000310348
MR0027	-0.00619421	-0.00253631	-0.000166625
MR0028	-0.00615967	-0.00195017	0.000746948
MR0029	-0.00943369	-0.000381178	0.000404259
MR0030	-0.0257948	0.00495883	-0.00206671
MR0033	0.0115675	0.00150322	0.00204951
MR0034	-0.0264323	0.00252827	-0.00135706
MR0035	0.0128283	0.0014006	0.00144324
MR0036	0.000633361	0.00626912	0.00103673
MR0038	-0.0304923	0.0141723	0.00335294
MR0040	0.0109576	0.0043956	0.000472813
MR0041	0.00385866	-2.21859e-05	0.000577315
MR0045	-0.00530397	0.000918023	0.000472596
MR0046	0.0212456	-0.00246954	0.00101975
MR0047	0.00435164	0.0043872	0.000413099
MR0048	0.00647597	0.00648569	-0.00036575
MR0050	0.0296157	-0.000567849	-0.000618929
MR0052	-0.00900123	-0.00244896	0.000973728
MR0053	0.00950161	0.000953152	0.000956359
MR0054	0.0010049	0.00191276	0.000425391
MR0055	-0.00345588	-0.000719602	0.000781361
MR0056	-0.0284355	0.00572367	-0.0011996
MR0059	-0.0513047	0.00865765	0.000127371
MR0061	-0.00855312	0.00576117	-1.51516e-05
MR0065	0.0116091	-0.00289811	0.00186442
MR0066	0.00583185	0.00149212	0.000398158
MR0068	0.0553695	-0.00221397	-0.000561398
MR0069	0.0454899	-0.00383174	-0.00223641
MR0070	0.00812656	-0.00195163	0.000433661
MR0073	0.017534	-0.0098885	-0.00198149
MR0076	-0.042342	0.00461223	-0.0011714
MR0077	0.0277969	0.00238104	-0.000589747
MR0078	0.0370383	-0.00240916	-0.00338044
MR0081	0.00978328	0.000176742	0.00199309
MR0082	-0.0292453	-0.00398815	0.00118045
MR0083	0.0102985	-0.000576152	0.000259957
MR0085	0.0219516	-0.000165498	0.00142695
MR0086	0.0031594	0.00523389	-0.00165784
MR0088	-0.0126267	0.00675666	-0.00077412
MR0089	-0.0325228	-0.00328984	-0.00303635
MR0090	-0.0251215	0.00459476	0.00124775
MR0091	0.0450764	0.00211373	-0.00111288
MR0092	0.0155359	0.00921377	0.000135884
MR0093	0.024041	-0.00430453	0.00119096
MR0094	0.00441623	-0.0020823	-0.000532227
MR0102	0.0427556	-0.00313727	-0.000822128
MR0103	0.00938423	-0.000396147	0.000734172
MR0104C	-0.00628757	0.00206482	-0.00154053
MR0106	0.0189786	0.00333008	0.000340206
MR0108	0.0227535	0.00800321	-0.00114759
MR0109	-0.00332085	0.00211041	9.0744e-05
MR0110A	0.00525447	-0.00406569	0.000794571
MR0112	0.0376954	0.0024351	-0.00112103
MR0115	-0.00458749	-0.00332439	0.000186511
MR0118B	0.0103089	0.00136519	-0.000553771
MR0119	0.0148336	0.00125133	0.000336134
MR0120	0.00343372	0.00514393	-0.000242926
MR0121	-0.0156502	-0.00120897	0.000755041
MR0122	-0.0164079	0.00780379	-0.00167634
MR0123	-0.0187339	0.00545223	-0.000753808
MR0124	-0.0977704	0.011665	-0.0014476
MR0125	-0.0015974	-0.00100833	0.000202765
MR0126	0.0147931	-0.00686165	0.00321454
MR0130	0.00482107	-0.0125956	0.00331949
MR01301	-0.00500271	0.00142355	-0.000235595
MR0131	0.00483792	0.00183552	0.00159307
MR0132	0.0118825	-0.00212862	-2.07307e-05
MR0133	-0.00570105	0.00498745	-0.00123405
MR0135	0.0155455	-0.00745691	0.00087846
MR0137	0.00934663	0.00444232	0.000129091
MR0138	0.0228297	0.00556949	0.000772748
MR0140	0.00359073	-0.000956593	0.00188554
MR0141	0.00382698	0.0123691	-0.000317278
MR0142	0.000327654	-0.0022362	0.000278055
MR0143	-0.0151844	-0.00122865	0.00107149
MR0144	-0.00624831	-0.00164993	-0.00051181
MR0145	-0.00317989	0.00260581	-0.00192429
MR0148	0.00523463	0.00203136	0.00100075
MR0151	-0.0552721	0.00536408	-0.0015761
MR0152	0.00140436	0.00398978	-0.00134718
MR0153	-0.00892206	-0.00511824	0.00074241
MR0155	-0.00270805	0.000185768	-0.000434688
MR0158	0.0249827	-0.00311777	0.000837007
MR0159	0.0213269	0.00693994	-0.000950884
MR0165	-0.0229902	0.00980435	0.000795969
MR0167	-0.0386831	-0.00103681	0.00037658
MR0168	-0.00334845	0.000891203	0.000331906
MR0169	-0.00464232	0.00418667	0.000572324
MR0170	-0.012149	-0.00372492	0.000786951
MR0171	-0.00324023	0.000640687	0.00211509
MR0172	0.016235	-0.00225879	0.00116633
MR0174	-0.0268775	0.000402699	-0.00154539
MR0177	0.00322422	-0.000602369	0.00114217
MR0178	-0.0125133	0.0038367	0.000189592
MR0179	0.0170072	-0.00171949	0.00125219
MR0180	0.0061547	0.00381448	0.001112
MR0182	-0.0175405	-0.00185329	-0.000943899
MR0183	-0.00927287	-0.00261496	0.000532536
MR0185	0.000569937	-0.000769232	0.000839472
MR0188	-0.00516541	-0.00524239	0.000161913
MR0189	-0.0358701	0.0111506	-0.0032021
MR0191	-0.00461212	-0.00375482	0.00157308
MR0192	0.0128507	-0.00394408	0.00120746
MR0193	0.0260415	0.00254511	-0.00199944
MR0194	0.0169386	0.00328533	0.000601469
MR0203	0.0248986	-0.00381899	-0.000221986
MR0207	-0.0457704	0.00589518	-0.00266316
MR0209	-0.0273461	-0.000707529	0.00052792
MR0210	-0.00604556	-0.00688738	-0.000250252
MR0212	-0.0192127	0.000624214	-0.00359646
MR0213	-0.00345512	-0.00207741	0.0005442
MR0215	-0.02129	0.00587745	0.000636041
MR0216	-0.00979267	-0.00399355	0.00139865
MR0217	0.0160655	0.000992117	-0.000698831
MR0218	-0.021708	-0.00175645	2.44554e-06
MR0219	0.00811085	-0.00258343	5.65505e-05
MR0220	-0.0246086	-0.00450987	-0.0023885
MR0221	0.00131872	0.00744106	-0.000419027
MR0223	-0.007518	-0.00436752	-0.000318342
MR0224	-0.0320763	-0.00189072	-0.000281795
MR0226	-0.00819279	-0.00302562	-9.79326e-05
MR0227	-0.000489697	0.000269584	-0.000145739
MR0230	0.0137935	0.00115898	-0.00255674
MR0231	0.0200555	0.00972012	0.000920356
MR0232	-0.0154545	-0.00806473	-0.000952362
MR0233	-0.0335563	-0.0094421	-0.000186288
MR0234B	-0.014649	-0.00774062	8.50629e-05
MR0236	-0.011184	-7.99467e-05	-0.000663462
MR0237	0.0267527	0.000413725	-0.00146921
MR0238	-0.0321725	0.00652174	-0.000355652
MR0239	-0.0155877	-0.00176071	-0.00191261
MR0240	-0.00148952	-0.00471992	0.000165916
MR0242	-0.02847	-0.00500788	-0.000842316
MR0246	-0.0534382	-0.00312927	-0.0029156
MR0250	-0.00386171	-0.00602803	-0.00037897
MR0251	0.0203591	5.53155e-06	-0.000658883
MR0252	-0.00112724	0.00896485	0.0013165
MR0254	-0.041934	0.00457782	0.000894361
MR0256	-0.0016569	0.00346886	-0.00086431
MR0257	-0.00647879	0.00537556	-0.000124708
MR0258	-0.0216756	0.00143029	-0.00263159
MR0261A	-0.0217259	0.0039743	-0.0013246
MR0263	-0.0199231	0.000183704	0.00133223
MR0264	0.0105712	0.00476811	0.00139944
MR0265	-0.0191187	-0.00630674	-0.000281731
MR0267	-0.0322586	0.00681366	0.00178031
MR0269	0.00829727	0.00254082	0.000808931
MR0271	0.0022872	0.00428099	0.000950899
MR0272	0.0219558	-0.00290851	0.00069983
MR0274	0.00519518	0.00426566	-0.000959569
MR0275	-0.00635705	0.00957529	-0.00140013
MR0276	-0.00642071	-0.00485447	0.000668263
MR0277	0.000534548	-0.00323916	0.00105635
MR0279A	0.000251012	-0.00441309	-0.000424905
MR0281	0.0288627	-0.00367384	-8.30538e-05
MR0283	0.02163	-0.00717532	-0.00121901
MR0286	-0.0383283	0.00457426	-0.00154114
MR0288	0.0159844	-0.00381626	-0.0023337
MR0292	-0.0226549	-6.15511e-05	-0.000682697
MR0293	0.0019486	0.000491485	-0.00131289
MR0294	0.00896382	-0.00609954	0.000688529
MR0301	-0.016606	-0.00358962	-0.000285297
MR0302	-0.00208886	0.0016746	-0.000782244
MR0303	0.0288829	0.000323037	0.000950201
MR0305	-0.00122912	0.00707938	-0.00013103
MR0306	0.0208082	-0.00136567	0.00149801
MR0310	-0.00590733	0.00319043	-0.000504039
MR0311	0.00427329	-0.000515783	-0.000930558
MR0313	0.0266086	-0.00329673	0.000135231
MR0314	-0.0159974	-0.00113868	0.00100776
MR0315	0.0167451	0.0065206	0.00108963
MR0318	0.00699177	-0.00447027	0.000512342
MR0319	0.0125667	-0.00250887	0.000980382
MR0325	-0.0347513	0.00165668	0.00034273
MR0326	-0.00814703	-0.00300939	0.000978233
MR0330	0.0514838	0.000187885	-0.00178764
MR0337	-0.0055422	-0.00259319	0.00019302
MR0341	0.0169531	-0.00377303	-0.000435011
MR0342	-0.000292412	-0.00386306	-3.89696e-05
MR0345	-0.0273193	-0.00233985	0.00198708
MR0347	-0.0161565	-0.0050888	0.00208807
MR0351	0.014873	-0.00174258	0.0011015
MR0353	0.00318472	-0.00306615	0.000530523
MR0356	-0.00283477	-0.000397088	0.000662562
MR0357	0.0064672	-0.0013095	0.00020301
MR0358	-0.0407795	-0.0123815	-0.00115254
MR0361	-0.0131322	-0.00365221	-0.0016904
MR0362	-2.84545e-05	-0.00330608	-0.000399295
MR0364	-0.00498755	0.00253399	-0.0012724
MR0367	0.00551911	0.00155356	0.00292853
MR0368	0.0392265	0.000485046	-0.00086993
MR0369	0.0374543	0.000988486	-0.000798169
MR0372	0.021816	-0.00960593	0.0011165
MR0373	0.000972091	0.00325017	-0.00111877
MR0375A	-0.0111634	-0.00121996	-0.001268
MR0375B	0.0226114	-0.00318789	-0.000356942
MR0376	-0.0177582	0.00332932	0.00191916
MR0377	-0.0266575	0.0047671	0.0019575
MR0382	-0.0460352	0.00435498	-0.00133898
MR0384A	-0.00950468	-0.000629341	-0.000541259
MR0384B	-0.0372673	-0.000353237	0.00121659
MR0387	-0.00987816	-0.00405072	0.00307693
MR0388	0.00660831	0.0016844	0.000883451
MR0389	0.0178167	0.00195024	0.00147646
MR0390	-0.00614933	0.00526104	0.000616248
MR0392	0.0254036	-0.00235022	-0.0014285
MR0395	0.0129065	-0.00106493	-0.000506353
MR0401	-0.0161367	-0.00100982	-0.000911271
MR0403	0.0241173	0.00280117	0.00055103
MR0404	-0.035896	-0.00885987	-0.000318058
MR0407	-0.017635	-0.00343311	0.00101228
MR0409	0.0387388	-0.00304003	0.000800919
MR0410	-0.0169521	-0.00685872	-0.0011499
MR0411	0.0173659	-0.00321714	0.000937763
MR0414	0.0168087	0.00132387	0.00181958
MR0416	0.058685	-2.01934e-05	-0.00208105
MR0420	-0.0605023	-0.00221879	-0.00313008
MR0421	-0.0198028	-0.000873722	-0.000371998
MR0422	0.0277218	0.00502349	0.000866141
MR0424	-0.0285209	0.00588645	0.00248276
MR0426	-0.00762209	-0.000510367	0.00208931
MR0429	0.00080538	-0.00206751	0.000561804
MR0430	0.0326436	0.00195053	-0.0017912
MR0431	0.00689393	0.000769491	0.00201934
MR0434	0.0166697	-0.0037928	0.00117536
MR0435	-0.0218527	-0.00495072	-0.00161435
MR0437	-0.0574051	-0.00575403	-0.00363913
MR0438	-0.0113168	0.00495071	0.000471253
MR0439	0.0269128	-0.00248557	0.000441765
MR0442	0.0287531	-0.00103071	0.000519493
MR0443	0.00543138	0.00359144	3.99723e-05
MR0445	0.00790514	0.00507439	-0.000215456
MR0447	0.018986	0.00186243	0.000622734
MR0448	-0.000493017	0.00227653	9.38757e-05
MR0449	0.01806	0.00143673	-0.00158043
MR0450	-0.00439768	-0.00250866	0.000166941
MR0452	-0.0304638	0.00453798	0.000811522
MR0457	-0.0197918	0.00168551	0.000208757
MR0460	0.0111979	-0.00547283	-0.00237931
MR0465	0.0105899	0.00115938	0.000887498
MR0466	0.00312513	0.000609728	0.00104689
MR0467	-0.0516731	-0.00807113	-0.00360152
MR0470	0.00103556	0.00370725	7.7464e-05
MR0472	0.0266898	0.00501093	-0.000834437
MR0474	-0.0112172	0.00156799	0.000771481
MR0476	0.0457552	-0.000924217	-0.00014345
MR0479	-0.00808613	-0.000711303	8.92056e-05
MR0480	-0.0140722	0.00133274	-0.000266366
MR0483	0.0281377	-0.000948441	-0.000490672
MR0485	0.0243096	0.000709133	-0.000497347
MR0489	0.00695635	0.00153946	0.000893933
MR0491	-0.026573	0.00578179	-0.000832662
MR0492	-0.0323664	0.00772169	-0.000638736
MR0495	0.00942058	-0.0031234	-7.61829e-06
MR0501	0.0398606	-0.0032412	-0.00160267
MR0503	-0.0134919	-0.00133761	-0.00202315
MR0506	0.0093108	0.00832435	0.000272005
MR0507	0.00718242	0.00262759	-0.00173006
MR0509	0.00119608	-0.00130933	0.00287891
MR0510	0.017144	0.00171897	0.00210131
MR0512	0.00942674	0.00185875	-0.00119694
MR0514	-0.0152278	-0.00587605	0.00162151
MR0515	0.00392374	-0.00514323	0.00145385
MR0516A	-0.000692516	-0.00453967	-0.000250649
MR0523	0.00616431	0.0015261	-0.000162722
MR0524	0.00826863	-0.00148423	0.000981856
MR0525	-0.00621115	0.00874848	0.00226178
MR0527	0.0186493	-0.00512773	-0.000500471
MR0528	-0.00183878	-0.00111855	0.00108241
MR0529	-0.00870983	-0.000833625	0.00140571
MR0532	0.0374173	-0.00221256	-0.000486668
MR0533	0.0105218	-0.00272351	0.00276713
MR0534	0.0139406	0.000904199	-0.000881953
MR0536	-0.00706793	0.00181868	-0.00241055
MR0539	0.00962554	-0.00645584	-0.000111779
MR0540	0.0211157	-0.00342313	-0.00277836
MR0542	0.00517804	-0.0052351	-0.000986851
MR0543	0.0451194	0.00102714	-0.00188085
MR0545	-0.00237214	-0.00211771	0.00189365
MR0546	-0.029507	-0.00955743	-0.000915152
MR0548	-0.0266204	-0.00511198	0.000892606
MR0550	-0.0310565	-0.00552826	0.00121043
MR0551	-0.0190454	-0.00248989	-0.000502953
MR0554	0.025657	0.000709683	0.00084663
MR0556	0.00700377	-0.0015466	-0.00141117
MR0557	0.0355147	-0.000376097	0.000832026
MR0558	0.00226294	0.00161742	-0.00102276
MR0562	0.0358481	-0.000962105	0.000285649
MR0565	0.00109884	-0.00120467	-0.000655301
MR0566	0.0445329	0.00305126	-0.00100589
MR0567	0.0334879	-0.000973817	-0.000387947
MR0571	-0.000474747	-0.00280701	0.00163969
MR0572	0.0248424	-0.000145735	-0.00169183
MR0573	0.0165178	0.00316782	0.00130595
MR0575	0.0107372	0.00300951	-0.00139394
MR0576	0.000782375	-0.000933609	0.00125039
MR0577	-0.0293112	-0.00635681	-0.000329639
MR0578	-0.00113869	-0.00277404	-0.000194152
MR0579	-0.00510557	0.00274573	0.000831679
MR0580	-0.00850128	-0.00391536	-0.00203449
MR0581	-0.0164039	0.00628591	0.000105781
MR0582	0.0118586	-0.00197744	0.000308601
MR0583	-0.00947072	-0.000547767	0.00135608
MR0585	-0.00105291	-0.0021886	0.00225783
MR0588	-0.0057044	0.0084113	-8.64891e-05
MR0590	-0.0160249	-0.000444985	0.000131339
MR0593	0.000915882	0.00515108	-0.00085956
MR0594	0.0230647	0.00225022	0.000306296
MR0602	-0.0126515	-0.00385091	0.00118353
MR0603	0.00383305	0.0077886	-6.65923e-05
MR0608	-0.0201163	8.86337e-05	-0.000616561
MR0609	0.00654709	-0.000752108	-0.000678018
MR0610	-0.0145343	0.00117819	0.000168145
MR0612	-0.00294505	0.00270441	-0.000925917
MR0613	0.0541126	4.13389e-05	-0.00201903
MR0615	-0.00485272	-0.00419072	0.00200506
MR0620	0.0157119	0.00156561	0.000252922
MR0621	-0.0208083	-0.00600442	0.000424651
MR0626	0.0132395	1.31732e-05	0.00123709
MR0630	0.0269387	-0.000671786	0.000392389
MR0631	-0.0117029	-0.00384433	6.18074e-05
MR0635	-0.00169437	-0.010938	0.000502548
MR0637	-0.00607092	0.0078549	0.00118411
MR0638	-0.023392	0.000725309	0.000903673
MR0642	-0.0257367	0.000142849	0.00224483
MR0646	-0.0137623	0.0031223	0.000463981
MR0647	-0.0415944	0.00313706	-0.00282442
MR0648	0.00907793	-0.00362528	0.00119457
MR0649	-0.006353	0.000896878	0.00224022
MR0653	0.00780168	0.0027455	-0.000406714
MR0654	-0.00973183	0.00729537	-0.000526821
MR0655	0.0218114	0.002703	-0.000623598
MR0656	-0.000686682	4.50484e-05	-0.000394168
MR0658	-0.00305104	-0.00316682	-0.000171461
MR0660	0.0543174	-0.00300969	-0.0037232
MR0661	0.00812534	-0.00134287	0.000125695
MR0667	0.0511523	0.0014394	-0.00347893
MR0668	0.0223155	-0.00168034	-0.000183125
MR0670	0.00253113	0.000777291	0.00253272
MR0673	-0.00862167	-0.00205862	-0.00151324
MR0675	0.00872254	-0.000787884	0.00100595
MR0676	-0.0304188	0.00161768	0.000614006
MR0677	0.0248063	-0.00085228	0.000572334
MR0679	-0.0153216	0.0040126	-0.000851503
MR0682	-0.0444555	0.0096536	-0.0011793
MR0683	0.0432606	-0.00137086	-0.00199384
MR0684	0.00260385	-0.000772116	-0.0025138
MR0686	0.00647605	0.00258714	0.000704692
MR0688	0.0137721	-0.000985627	0.00129872
MR0689	0.00495313	-0.00406479	0.00256205
MR0695	-0.0447471	0.0017906	-0.000844389
MR0701	-0.00289174	0.00618322	0.00144809
MR0702	0.000385825	-0.0111463	0.00147102
MR0706	-0.0144942	0.000626712	-0.00120371
MR0709	0.0091177	-0.00252028	0.00157806
MR0711	-0.014282	-0.000954206	-0.00126128
MR0712	0.0224769	-0.00522506	-0.00229899
MR0713	0.0386565	-0.00674939	0.00105102
MR0714	0.0118442	0.00200964	0.0011023
MR0715	0.0043981	-0.00537413	0.000904748
MR0716	0.0389723	0.00292438	-0.000343994
MR0720	-0.0533607	-0.00233094	-5.6252e-05
MR0721	0.0159669	-0.00212124	5.2537e-05
MR0726A	-0.0132714	0.00738869	0.000267531
MR0727	0.0185824	-0.0042617	0.000243673
MR0728	-0.0276087	0.00616972	-0.0019097
MR0731	0.00323901	-0.00503083	-0.00142784
MR0732	0.0353051	-0.000798054	0.000782091
MR0733	-0.00546179	0.00389107	-0.000170839
MR0738	0.0467848	-0.00285708	-0.000178158
MR0743	0.0201161	0.00357868	-3.19083e-05
MR0745	-0.015193	0.00176656	0.000934335
MR0747	0.0181209	0.000247111	-0.000911068
MR0750	-0.0340002	-0.00283135	-0.000858375
MR0751	-0.043396	0.00318502	-0.00274587
MR0752	0.0245658	-0.00806422	-0.000214841
MR0754	0.0189131	-0.00128155	-0.000585394
MR0755	0.00138662	-0.00212659	0.00212066
MR0758	0.00918175	-0.000538683	0.000535416
MR0760	0.00236681	-0.00328535	-0.000607822
MR0763	0.0360663	0.00200445	0.000809658
MR0765	0.0361118	0.0031541	-0.00155067
MR0767	0.017982	-0.00528918	-0.000409738
MR0768	0.0215821	0.000935697	0.000999863
MR0769	0.00503365	0.00130053	-0.00354661
MR0770	-0.0340084	0.00181026	-0.00054922
MR0771	0.0185632	0.000452037	0.00118637
MR0773	0.0067267	0.00424892	0.0012832
MR0778	0.039642	-0.0035078	-0.000650205
MR0781	-0.0191313	-0.00286933	-0.00158804
MR0783	-0.0295267	-0.00388945	0.000433061
MR0784	0.0496431	0.00214681	-0.000875671
MR0787	-0.0128554	-0.000841271	-0.00188218
MR0788	0.0464455	-0.00723418	-0.0013806
MR0790	0.0345163	0.00159246	-0.000820358
MR0793	0.0316941	-4.14829e-05	-0.000351647
MR0795	-0.0524406	0.00800843	-0.000969618
MR0802	-0.0340287	-0.00173967	0.00127703
MR0805	-0.0133634	-0.00317382	0.00163151
MR0808	-0.0206641	0.00114738	0.000820903
MR0810	-0.00564885	-0.00294497	-0.00275194
MR0811	0.00492608	-0.000687944	0.000530427
MR0817	0.0101506	-0.00549688	0.0014897
MR0818	0.0178176	-0.00269735	0.000475148
MR0820	-0.00104949	0.000388898	0.00194757
MR0821	-0.0340491	-0.00320013	0.00116148
MR0823	0.0538551	0.00219788	-0.00168194
MR0827	-0.0154023	0.00243437	-0.00125478
MR0828	0.000503899	0.000648807	0.000928388
MR0829	0.0188767	0.00460824	-0.000864194
MR0835	-0.00984335	0.00186971	-0.000168184
MR0836	-0.0258967	0.00176508	-3.61468e-05
MR0838	-0.0191462	0.000399722	-0.000544389
MR0839	0.0523876	-0.00138901	1.38501e-05
MR0842	-0.0386676	0.00100036	0.000163959
MR0844	-0.00473253	-0.00567063	0.00291883
MR0850	0.0112859	0.00195334	-0.000968246
MR0851	0.000878805	-0.00244819	0.000140879
MR0853	0.00806082	-0.000544759	0.00043818
MR0857	-0.0113917	-0.00346079	-0.000471284
MR0860	-0.0200184	0.000638764	-0.000577282
MR0861	-0.00199275	0.000795238	-0.000142434
MR0863	-0.0256316	-0.00195809	0.00105815
MR0865	-0.0272356	0.00274488	-0.000656174
MR0866	-0.00289731	0.00164662	0.00124338
MR0867	0.0208646	-0.00545789	-0.00187441
MR0869	-0.014168	-0.00618344	0.00103983
MR0873	0.0384375	-0.00216587	0.000473929
MR0874	-0.000198685	0.00148518	0.000142665
MR0876	0.00636918	-0.00455022	0.000705804
MR0878	0.0177973	-0.00476085	0.000607699
MR0880	-0.0310934	-0.00423818	-0.000459995
MR0881	0.00351511	-0.000408409	0.00308528
MR0885	-0.0459481	-0.0108532	-0.00065863
MR0887	0.0483663	-0.00271364	-0.000748537
MR0889	0.0230534	-0.00728043	-0.000261738
MR0890	-0.0142765	0.000871533	-0.00125722
MR0901	-0.0185824	-0.00382348	0.00251557
MR0902	0.00509367	-0.00451219	0.00072253
MR0903	-0.00692131	-0.00271088	0.00130114
MR0904	0.0130252	-0.00176332	0.000566094
MR0905	0.0172798	-0.00189572	0.00270858
MR0906	0.0160782	0.00310614	5.27251e-05
MR0907	0.0157524	-0.00291296	0.00140231
MR0908	-5.88088e-05	-0.00125098	-0.00111181
MR0910	-0.0245564	0.00389901	0.000378538
MR0911	-0.0465366	0.000882218	-0.000443768
MR0912	0.00491849	0.00205321	0.00141942
MR0913	0.01103	-0.00123463	0.000645303
MR0914	-0.0495467	-0.000515399	-0.00155623
MR0915	-0.0572547	-0.000748628	-0.0011667
MR0916	0.0439295	0.000801266	-0.000902081
MR0917	-0.000334329	0.00312476	-9.13031e-05
MR0919	-0.0112138	-0.000271114	0.00254764
MR0920	-0.0441061	0.00294285	0.0026111
MR0922	0.00225715	-0.000972035	0.000989147
MR0924	-0.00763749	-0.00346378	0.00154504
MR0926	0.0155346	-0.00161267	0.000525504
MR0930	-0.0299474	-0.00215028	0.00111188
MR0931	0.00614572	-0.0018857	0.00071635
MR0934	-0.0175017	-0.00669628	-0.00183839
MR0935	-0.0139338	0.00611456	0.00320907
MR0938	0.00195869	0.00768068	-0.000668187
MR0942	-0.0437457	-0.00294221	-0.00284056
MR0944	0.00554245	-0.0047078	0.0022954
MR0945	0.048987	-0.00107827	-0.00161071
MR0951	0.0175234	-0.000404308	-0.000152999
MR0953	0.0243833	0.000749764	0.00153545
MR0954	-0.00366575	0.00884635	-0.000445035
MR0955	0.0326808	0.00295832	-0.000347113
MR0958	0.0167505	-0.00364649	0.000677716
MR0960	0.00235596	0.000224151	0.00123587
MR0961	-0.00500288	-0.00440203	-0.000129514
MR0964	-0.0209183	-0.00583756	-0.000972867
MR0965	0.0184106	0.00379937	-0.000385419
MR0966	0.0428118	0.00312008	-0.00133062
MR0967	-0.0276231	0.00192143	0.00115465
MR0968	0.0321923	-0.00512146	0.000504254
MR0970	0.0366984	0.00316178	-0.000541526
MR0971	-0.0276702	-0.00491046	0.000262506
MR0974	0.0336252	-0.00892442	5.3323e-05
MR0975	4.19267e-05	7.58374e-05	0.000225913
MR0977	0.0258285	-3.98007e-05	-0.000417199
MR0980	-0.017399	-0.00354549	0.00276244
MR0982	0.0239333	-0.00353496	0.000633133
MR0984	-0.0259422	0.00539739	-0.00120657
MR0986	0.0152886	-0.00495021	-0.00206734
MR0988	0.0034516	0.0031204	0.000893854
MR0989	-0.0195611	0.000220924	0.00202419
MR0990	0.0314622	-0.00180424	0.00130129
MR0993	-0.0178656	0.0112222	0.00301675
MR0994	0.0302108	-4.25472e-05	-0.00101433
MR1008	0.0150449	-0.00418894	-9.77789e-05
MR1009	-0.0267318	-0.00358752	-0.000419607
MR1012	-0.0418874	0.00103671	-0.000205735
MR1014	0.00275034	0.00176805	0.00118099
MR1016	0.028503	-0.0045795	0.000543424
MR1017	-0.00182852	-0.00478285	0.00165125
MR1020	-0.0100671	-0.001615	3.53509e-05
MR1022	0.0106354	-0.00225279	0.00135876
MR1024	-0.00646735	0.000579368	-0.000917606
MR1028	0.000601991	0.00128292	-0.00105315
MR1031	-0.00937137	0.000195346	-0.00029884
MR1032	-0.0266077	-0.00370438	0.000599363
MR1033	0.0254261	0.00629243	-0.00202204
MR1037	0.0296853	-0.00228301	-0.00174668
MR1038	0.0185152	0.0061349	0.000458733
MR1041	-0.00710313	-0.00144968	0.000292159
MR1047	0.00372569	0.00413038	-0.000373891
MR1049	0.019886	-0.000149364	8.95571e-05
MR1051	-0.0335442	0.00446521	-0.000274072
MR1055	-0.00102393	-0.00106424	-0.00132443
MR1057	-0.00619529	-0.00725705	0.000892587
MR1058	-0.0155257	0.010864	0.000850355
MR1059	0.00905137	0.00178409	0.000904289
MR1060	0.0137374	0.000307689	-0.000254839
MR1065	-0.0168546	4.38729e-05	0.000112689
MR1066	-0.0666609	0.00736376	-0.00192208
MR1069	-0.0378079	-0.00322943	-0.000211047
MR1071	-0.05982	-0.00164761	-0.00130714
MR1073	0.0271092	0.00123638	-0.0018116
MR1077	-0.00878452	0.00166925	0.00191246
MR1078	-0.00506162	-0.000690814	-0.000491056
MR1079	-0.00164094	-0.00179367	0.00108963
MR1081	-0.0286079	-0.00028623	-0.00143024
MR1083	0.0152571	-3.7729e-05	0.0010836
MR1084	-0.0119788	-0.00261837	-0.00237602
MR1089	-0.00330942	-0.00494757	0.00182173
MR1092	-0.0109603	0.00124043	0.00039916
MR1093	0.0492808	-0.000487971	-0.00134721
MR1094	0.0120764	-0.00684555	0.00110329
MR1095	0.0134116	0.00639731	-0.000324694
MR1106	0.0137881	0.00182855	-0.000941549
MR1109	0.00626624	-0.00218577	0.000343542
MR1110	0.0299341	-0.00413879	0.00145829
MR1111	0.0125502	-0.00170219	0.00228851
MR1112	-0.0205526	-0.00165549	-0.00020796
MR1114	-0.0185731	0.00412736	-0.00159612
MR1115	-0.0366769	-0.00558201	-0.00177629
MR1121A	0.0128394	0.00380556	0.000797767
MR1122	0.00284417	0.0059768	-0.00136831
MR1123	0.0142517	-0.00760694	-0.000650983
MR1125	-0.0200378	0.0058742	0.00129296
MR1128	-0.0317028	0.00271792	-0.000538802
MR1130	0.0127448	-0.00235926	0.00227194
MR1131B	-0.0219743	-0.00379859	-0.00141957
MR1133	-0.0273218	0.00196659	-0.00161314
MR1136	-0.00321523	-0.00042499	0.000999232
MR1138	-0.0304207	0.00446749	-0.00192382
MR1139	-0.0310094	-0.0052767	-0.000910291
MR1140	0.0453432	-0.00412295	-0.000265574
MR1142	-0.00527019	0.00308922	5.70605e-05
MR1143	-0.00191717	0.00480876	0.00318435
MR1145	-0.0169182	0.00261293	0.000980306
MR1146	0.0166381	0.00232408	0.000745959
MR1147	-0.0326409	0.00472789	-0.000658988
MR1148	-0.00945974	-0.0032951	-0.000406193
MR1149	-9.62126e-06	-0.00142603	-0.00049628
MR1150	-0.0467027	-0.000460406	-0.00143933
MR1152	0.0484744	-0.00260373	-0.00250476
MR1153	0.0136661	0.00939045	0.000526688
MR1154	0.00619391	0.00271124	0.00264627
MR1155	-0.0076628	0.00293773	0.000393829
MR1156	0.00924284	0.00291353	0.00045776
MR1157	-0.00449662	-0.00514207	0.00185887
MR1160	0.00977336	0.000180289	-1.12101e-05
MR1162	0.0257159	-0.00486459	-0.000235707
MR1164	0.0171002	-0.0036768	0.00212061
MR1169	-0.0133956	-0.00184528	-0.000565534
MR1171	0.0354657	-0.00145833	0.00280598
MR1172	-0.00906383	0.00114971	-0.00130647
MR1174	0.0205908	0.0012783	0.000165842
MR1175	-0.0218367	0.00695859	-3.66932e-05
MR1176	-0.0288686	0.00327275	0.000288965
MR1177	-0.027528	0.00530248	0.000350624
MR1178	0.0246431	-0.0028258	0.000255971
MR1179	-0.00188043	2.45971e-05	-0.00173756
MR1180	-0.0169624	0.000333129	-0.00114745
MR1184	0.0034493	-0.00564487	-0.00108812
MR1185	0.0333235	0.00121346	-0.00112935
MR1186	0.0289498	-0.00258803	-0.000815808
MR1189	-0.0240089	0.00162861	0.00100586
MR1190	-0.0275845	-0.00544793	-0.00124867
MR1191	0.00550294	-0.000415889	-0.000544081
MR1192	0.00456078	0.00201287	0.0018871
MR1195	0.0085866	-0.000514682	0.0010068
MR1201	-0.00713912	-0.00310208	0.00117757
MR1202	0.0201279	0.00761067	-9.21701e-05
MR1204	0.00160418	-0.00043511	0.000836757
MR1207	0.0242806	-1.33884e-05	-0.000605714
MR1208	-0.0481674	0.00781643	0.000227591
MR1210	-0.00591708	-0.00311431	0.0008127
MR1212	0.0270678	3.11098e-05	-0.00101771
MR1213	0.0230202	0.000898908	0.000124631
MR1217	0.00825102	-0.00216713	0.000666388
MR1220A	-0.0228663	-0.00664363	0.00135132
MR1221	0.0119624	0.00255778	0.00160901
MR1223	0.0319868	-0.000703969	-0.00115941
MR1224	0.00605744	0.00293178	7.10508e-05
MR1225	0.00513217	0.00166865	-0.000317951
MR1226	0.0178022	-0.00233059	0.0012717
MR1227	-0.01538	0.00515062	-0.000741925
MR1228	0.00662092	0.00436994	0.000335816
MR1231	-0.0109111	-0.00929675	-0.00060425
MR1232	0.00425941	0.00297917	0.000932099
MR1233B	0.0148246	0.00130626	0.00199108
MR1235A	0.00104547	0.00640733	0.00137429
MR1236	0.0179568	0.000259948	-0.000217475
MR1240	-0.0127397	-0.00302314	0.00145374
MR1242	0.00786663	0.00442983	0.000147287
MR1243	-0.0446644	0.0102638	0.000136581
MR1245	0.0101412	-0.00207901	-0.000432013
MR1246	-0.0583459	-0.00105168	-0.000509727
MR1247	-0.00676669	-0.00375159	0.00208635
MR1248	-0.00399327	0.00902812	0.00122141
MR1249	0.017828	-0.0021474	-0.000833584
MR1251	0.0165661	-0.000226936	-0.000863408
MR1252	-0.0347583	0.00299705	-0.000893366
MR1253	-0.0852151	0.00622452	-0.00377996
MR1254	-0.000497559	0.000596263	-0.000721455
MR1260	0.0204322	0.00124196	-0.00175692
MR1261	0.0200201	-0.00394256	-0.00304944
MR1265	-0.00816309	0.000287035	-0.000188621
MR1266	-0.0189847	0.00752563	0.000118296
MR1267	0.0204218	-0.00535253	0.000556946
MR1268	-0.0126084	0.00426431	0.0003683
MR1269	0.0145404	-0.00136692	-0.00159772
MR1271	0.0326774	-3.61162e-05	-0.00101663
MR1274	0.0085606	-0.000642244	-3.92543e-05
MR1276	0.0200364	0.00270661	0.00179417
MR1279	0.0116562	0.000965774	-0.00116617
MR1281	-0.0234602	-0.00247004	-0.00166556
MR1282	-0.0646854	0.00643099	-0.0040306
MR1284	0.0299785	-0.00302104	0.000406629
MR1286	0.00447362	-0.00336073	-0.00497463
MR1289	-0.0104487	0.00583365	0.000409539
MR1290	0.0494627	2.36145e-05	-0.00139817
MR1292	0.0175791	-0.00726241	-0.000861499
MR1293	-0.0184093	0.0073402	-0.000755166
MR1303	-0.0153542	0.00758368	-0.00176969
MR1304A	-0.0255444	0.00528921	-0.00296491
MR1304B	-0.0379809	-0.00884223	-0.000159208
MR1305	-0.0072284	-0.0098505	-0.0024708
MR1306	0.0205617	-0.00238236	0.000245755
MR1307	-0.0626744	-0.00707246	-0.00265613
MR1309	0.010632	-0.00622532	-0.00255963
MR1310	0.0274016	-0.00452854	0.00235962
MR1311	-0.00830341	-0.00119261	1.32116e-05
MR1313	-0.000549657	-0.00123001	0.00147599
MR1317	-0.0382647	0.00107383	-0.00209469
MR1318	0.0250513	0.00270797	0.000122937
MR1320	-0.012675	0.00473687	0.00337373
MR1321	0.000866258	0.000162301	0.000913554
MR1322	0.0517505	-0.00549631	-0.00149646
MR1323	-0.0244243	-0.00559269	0.00154882
MR1324	0.0140151	-0.00226348	0.000532935
MR1325	0.0246238	0.00281786	-0.00115645
MR1327	-0.0179362	0.00306381	-0.000136406
MR1332	-0.0107134	-0.00291703	-0.000398019
MR1333	-0.0035529	-0.000282577	0.000609666
MR1334	0.029053	-0.00266791	-0.000270813
MR1335A	0.0120769	0.0048383	0.00243818
MR1339	0.0123044	0.000860147	0.0016791
MR1340	0.0152934	-0.000183058	-0.000219123
MR1341	-0.0149979	-0.00397233	0.00215298
MR1343	-0.0386682	0.00163319	0.00358664
MR1344	-0.018449	-0.00324287	-0.000175403
MR1345	0.0133697	0.00112588	4.4175e-06
MR1352	-0.0208014	0.00428856	0.00128061
MR1354	0.0387187	-0.00091534	-0.000128447
MR1356	-0.00895594	-0.0061293	-0.000706728
MR1357	-0.00244774	0.00384338	-0.00144789
MR1358	-0.0211106	0.00609149	-0.000796705
MR1360	-0.0245868	0.00273195	-0.000587919
MR1361	0.0105107	-0.000176707	-0.000378597
MR1362	-0.038766	-0.00779226	-0.00183727
MR1363	-0.011429	-0.00624196	-0.000531892
MR1365	-0.016424	0.00201857	0.00038655
MR1368	0.0261812	-0.00302438	0.00073763
MR1369	-0.0185637	0.0061545	-0.000781589
MR1370	0.0203289	-0.000462099	0.00101754
MR1372	-0.0112498	-0.00387829	0.00242594
MR1375	0.0412407	-0.00353899	-0.00156715
MR1376	-0.00800547	0.00669408	-0.00177351
MR1377	0.00383287	0.000165006	-0.000407852
MR1378	-0.0375908	0.00010022	-0.00111247
MR1380	0.00465885	0.00406739	0.00243368
MR1381	-0.0424912	-0.00404374	-0.00572779
MR1382	-0.0157347	0.00581682	0.00208737
MR1384	0.0310578	-3.79424e-05	0.00220156
MR1385	-0.00728741	-0.000129835	0.0011867
MR1386	-0.00502954	0.00100201	-0.00254751
MR1388	0.00732427	-0.00162282	0.00169365
MR1389	-0.0162608	-0.00139293	0.00121882
MR1391	0.00440505	-0.00648654	0.000801544
MR1402	-0.016066	-0.00868703	-0.00214477
MR1404B	0.019427	0.00674612	-0.00149963
MR1407	0.0350457	0.000300102	-0.00145953
MR1410	0.00920562	-0.00226154	0.000968076
MR1411	-0.0180632	-0.00720945	0.00107878
MR1412	0.0296995	0.00114854	0.00208819
MR1413	-0.00308411	-0.00264151	0.00138122
MR1415	0.0085632	0.0051279	0.000404448
MR1416	-0.0448271	-0.00140445	-0.00338785
MR1420	-0.0161268	-0.000435375	-0.00336762
MR1422	0.00444004	-0.000996721	0.000966551
MR1423	-0.0111325	-0.00277105	-0.000517894
MR1426	-0.00831116	-0.00336172	7.0397e-05
MR1428	0.0173426	-0.00180624	0.00154787
MR1429	0.00804558	0.00183476	0.000411572
MR1431	-0.00687156	0.00547623	0.000497911
MR1432	-0.00626242	-0.000508594	0.00234281
MR1433	0.0207842	-0.00649532	0.000729737
MR1434	0.0320939	-0.00521145	-0.000362032
MR1435	-0.00191876	0.00584818	0.00161769
MR1437	-0.0455972	0.000679944	-0.000216218
MR1439	-0.0212087	0.00114627	0.00092696
MR1440	-0.0204878	0.00453891	-0.0025624
MR1442	-0.0107295	0.00753164	-0.000502835
MR1444	-0.0030142	0.0127756	0.000425673
MR1446	-0.0268813	-0.00850901	0.00213717
MR1448	0.0336681	0.00173289	-0.00159566
MR1449	-0.0157369	-0.00534523	0.000864555
MR1450	0.0271765	0.00237565	0.000991496
MR1451	-0.0145734	0.011868	-0.000458183
MR1457	0.00289451	-0.00536468	8.02769e-05
MR1458	-0.0248061	0.00514806	0.00191455
MR1459	-0.0254993	-0.00352665	0.000760539
MR1461	0.00388665	0.00364729	-0.000456028
MR1462	-0.0135056	0.00722284	0.000311061
MR1463B	-0.00624221	-0.00687231	0.00133592
MR1465A	-0.0148816	0.000670499	0.000329809
MR1465B	-0.0279083	-0.00463716	-3.57945e-05
MR1466	-0.00275867	0.000631091	0.000698312
MR1467	-0.0260054	-0.000891067	0.00298067
MR1469	-0.00784261	0.00265789	0.00087672
MR1470	-0.00669228	0.00279098	0.000804733
MR1471	-0.0193217	-0.0012376	0.00086509
MR1472	-0.0107746	-0.000576973	-0.00110404
MR1474	-0.00688841	0.00247326	0.00270334
MR1475	0.00132493	0.00398227	0.000138511
MR1476	0.0129389	0.00228254	0.000212478
MR1477	-0.0124786	0.00160156	-0.00342462
MR1478	0.0317558	-0.00209741	-0.000616125
MR1484	0.0546236	0.000202476	-0.000135506
MR0010	-0.0019559	0.00718679	0.00153136
MR0013	0.00207483	0.00523778	0.00176216
MR0031	0.0148499	0.00192836	-0.000102926
MR0044	0.00725383	0.00119962	0.00043292
MR0063	0.0386945	-0.000563662	-0.000198829
MR0067	0.00396736	0.00427535	0.000362819
MR0079B	0.0102773	-1.57137e-05	-0.0011886
MR0105	-0.0119839	-0.00174059	0.000354973
MR0107	-0.00934698	0.00254899	-0.00143257
MR0184	0.0268553	0.0011052	-0.00144967
MR0222	-0.0242874	0.000668987	-0.001433
MR0225	-0.0125639	0.000850013	0.000458159
MR0259	0.0175363	0.00100557	0.00200189
MR0268	-0.00613009	-0.000421867	-0.000401812
MR0280	0.0187456	0.00154109	-0.000434084
MR0287	0.00616932	0.00932149	-0.000476737
MR0348	0.00358294	0.0050528	-0.000123019
MR0378	0.0168076	0.00375015	0.00068096
MR0380	0.000902531	-0.00209089	-0.00034824
MR0391	0.0231124	0.00259938	-0.00103758
MR0412	-0.0046887	0.00144173	0.00181176
MR0446	0.00837651	-0.00179522	-0.000602046
MR0475	-0.0190485	-0.00206195	0.00035223
MR0477	0.000242196	0.00591303	0.000105223
MR0520	0.00212241	-0.00275401	0.000400889
MR0549	0.00158025	0.00241119	-0.000447809
MR0552	0.007995	-0.00286808	-0.00114648
MR0559	0.0318293	0.00148062	0.000189989
MR0560	-0.0396706	-0.0016947	-3.41111e-05
MR0586	0.0158327	0.000207503	-0.000424167
MR0614	-0.015382	0.00409132	0.000493013
MR0619	-0.00626782	0.00183704	0.000712394
MR0663	0.0407386	0.00107364	-0.00136433
MR0692	0.00565597	-0.00234516	-0.000131703
MR0725	-0.0103704	-0.00309141	0.00137058
MR0746	-0.00587535	-0.00514348	0.000750808
MR0794	0.00895679	0.000490803	-0.000399587
MR0803	0.00635952	0.00484312	0.000463896
MR0809	-0.032023	-0.00313579	0.0004454
MR0813	0.00939964	-0.00506659	0.0007332
MR0815	0.0332394	-0.000198925	-0.00112253
MR0837	-0.000567314	0.00431329	0.000666088
MR0841	0.0106622	-0.000948994	-0.000291114
MR0847	-0.0154408	-0.00739797	-0.000511615
MR0864	-0.00429466	0.000983215	0.000486738
MR0882	-0.0225636	0.00652766	0.000784475
MR0918	-0.00670106	0.00373498	0.00105417
MR0921	0.00311183	-0.000874429	0.000689869
MR0947	-0.0319967	-0.00646723	-0.000903911
MR0972	0.0212882	0.00227048	-0.00109825
MR0976	-0.0221452	0.00584668	-0.00178721
MR0985	0.0125023	-0.00356467	-0.000269758
MR1010	0.0228567	-0.00142775	0.000521395
MR1042	0.0187617	-0.000992148	-0.000364584
MR1075	0.0139734	0.00530012	-0.0018508
MR1086	-0.0434638	-0.00568084	-0.00113085
MR1088	0.00461187	-0.00184584	0.000354136
MR1135	0.00887709	0.00199501	-0.000903605
MR1166	0.00184935	-0.00438714	0.000241231
MR1168	0.0214258	-0.00195506	-3.2942e-05
MR1205	-0.036144	0.00208937	-0.00192994
MR1219	-0.0242944	-0.00492172	0.000326647
MR1244	0.0349664	0.000793942	0.000467671
MR1263	0.0307786	-0.00271301	-0.00150923
MR1273	0.0108818	-0.000403288	-0.000797958
MR1275	-0.00848783	3.30595e-05	-0.000309507
MR1280	-0.0266859	-0.00139117	-0.000236136
MR1288	0.0367668	-0.00112784	-0.0023188
MR1301	-0.000965382	-0.00102105	0.00109723
MR1308	0.0135296	-0.00266444	0.000577232
MR1331	-0.0224069	0.00720012	0.00145748
MR1342	-0.00035913	0.00359124	0.00034845
MR1392	0.0209101	-0.000896708	-0.000561646
MR1395	0.0367893	-0.00439021	0.00212602
MR1406	0.0168897	-0.00193706	0.000345797
MR1419	-0.00166082	0.00547499	0.000476007
MR1425	-0.0222851	-0.00379845	-0.000309802
MR1464	0.0293973	0.00049548	-0.00132218
MR1480	0.0042158	0.00269741	-0.000302988
MR1482	-0.0154088	-0.0031225	0.000173123
MR1483	0.0298506	0.00555528	-0.00147806

## Sheet: Raw PCs
Genotype_file	Replicate	PC1	PC2	PC3	PC4	PC5	PC6	PC7	PC8	PC9	PC10	PC11	PC12	PC13	PC14	PC15	PC16	PC17	PC18	PC19	PC20	PC21	PC22	PC23	PC24
MR0001_TraceCoords	G31	-0.0715479	-0.00258965	0.022811	0.00975849	0.00664057	-0.00992279	-8.43064e-05	0.00160704	-0.00242544	-0.000496593	0.00117632	0.00130055	0.00101015	-5.70001e-05	-0.00181569	0.00104262	0.00123877	0.000420734	5.38048e-05	0.000528265	-4.11421e-05	0.000250195	-0.00017033	3.12377e-05
MR0003_TraceCoords	G31	-0.0490317	0.00500883	0.00462698	-0.00107311	-0.00204537	-0.00742031	0.0052416	-0.000945521	-1.86633e-06	-0.00108165	-0.000253582	0.00152446	-0.000834362	-0.000172473	-0.000158808	0.000130779	0.000425984	-0.000343538	-0.000126451	-0.00012255	-9.42498e-05	-1.70574e-05	-6.1423e-05	-4.87471e-06
MR0004_TraceCoords	G31	0.0372002	0.0214694	-0.00171063	0.00654037	-0.00451967	0.0016848	-0.00308931	0.00531596	0.00153933	-0.00166415	-0.000606482	0.000531267	-0.000616844	0.000228304	0.000403958	0.00060796	5.72494e-05	0.000285477	0.000134014	0.000287265	-0.000171061	0.000244685	0.000227211	7.08472e-08
MR0005_TraceCoords	G31	-0.0566511	-0.030339	0.015711	-0.00340883	0.00320147	0.0052684	-0.0011996	-0.000998969	0.00102967	0.00365794	-0.000858479	0.00422863	-0.00118699	0.00268837	-0.00168373	-0.000961974	-0.000235663	-9.44294e-05	0.000195112	0.000294798	0.000294379	-1.00074e-05	-1.31719e-05	2.24453e-05
MR0006_TraceCoords	G31	0.0120568	-0.0088837	0.0102453	-0.00765674	-0.00220578	0.00281931	0.000348938	-0.00115284	-0.00295404	-0.000355633	-0.000506772	0.00111024	-0.00164602	0.00069513	-0.00058803	0.000123174	-0.000209265	-0.000131416	0.000153242	0.000215133	-0.000241942	8.86943e-05	1.49501e-05	-1.29469e-05
MR0007_TraceCoords	G31	0.0977128	0.0496662	-0.000438921	-0.0350292	0.013744	0.011445	-0.0015372	0.00907855	0.0117578	-0.00115028	0.00207045	0.003266	-0.000144188	-0.00550116	0.00288519	-0.00106699	0.000223659	0.00350071	0.00239141	-0.000932102	-0.00171314	0.00198305	-0.000388019	6.12108e-06
MR0008_TraceCoords	G31	-0.0413591	-0.0169172	-0.00435196	-0.00480109	-0.00598662	0.0111649	0.00389887	0.00138656	-0.00215804	0.00222941	-0.00215408	-0.000171458	0.000358106	0.000906641	-0.000884417	-0.000471343	-0.000295034	7.18944e-05	-0.000604743	0.000370625	0.000359811	0.000365721	0.000128957	1.69683e-05
MR0009_TraceCoords	G31	-0.136458	0.0483311	0.00580511	-0.00479207	0.0192718	0.000360935	0.0152322	-0.00556835	-0.000899172	-0.00207575	-0.00187769	-0.0038067	0.000927093	0.00435386	0.000771025	0.00088142	0.000279184	-0.00163835	0.00132689	-0.000215472	-0.000769808	0.000435886	-0.000545386	-5.76702e-06
MR0011_TraceCoords	G31	0.0232914	0.0060783	-0.00335969	0.000585435	-0.00609162	0.000997729	-0.00180408	-0.00175569	-0.00359997	-0.0031807	0.00210925	-0.000380676	-0.000488532	-0.000326716	0.00029317	-2.28036e-05	5.31196e-05	-3.93013e-05	-0.000216919	-0.000220164	-0.000119272	-0.000254914	-5.51653e-06	1.87626e-05
MR0014_TraceCoords	G31	-0.0753234	0.0170081	0.00455354	0.00780395	0.00128036	-0.0015503	0.00259798	-0.000432124	-0.00635788	-0.000877503	0.00305611	-0.00161469	-0.00275953	0.000251234	0.00191443	0.00102556	-0.000332148	-0.000813262	0.000270681	0.000194089	-0.00017972	0.000664851	-0.000492944	-3.13354e-06
MR0015_TraceCoords	G31	-0.0218593	-0.0138095	0.00289427	-0.00823911	-0.00537876	0.0128821	0.00783133	-0.0011715	0.000212052	-0.00205957	0.000103057	0.00136591	0.00054468	0.00151866	0.000783395	-0.000134363	-0.000209038	0.000665931	-0.000186577	7.47009e-05	0.000670637	8.49507e-05	-5.26705e-05	-9.43312e-06
MR0016_TraceCoords	G31	-0.0951023	-0.0108351	-0.00857865	-0.00325226	0.00189187	-0.00219406	0.00059454	0.000304226	-0.000274415	-0.000893017	0.00188657	-0.00147641	0.00038507	-0.0008768	-0.00209088	-0.00125631	0.000508171	7.72698e-05	-0.000465921	-0.000283911	-0.000317248	0.000207082	-4.65491e-05	-1.83939e-05
MR0018_TraceCoords	G31	-0.0513774	-0.0170092	0.00459871	-0.00219906	-0.00086289	0.00212399	-0.00651244	0.00368791	-0.00413433	0.00221717	0.000524649	0.00265385	0.00017508	-0.000393764	-0.000896424	0.000153636	-0.00122463	-0.000568854	0.000950745	0.000795901	-0.000217142	-0.00016552	-6.36581e-05	-1.80342e-06
MR0020_TraceCoords	G31	0.0781207	0.0214987	-0.0084205	-0.00113338	0.000595387	-0.00399389	-0.00253126	0.00384411	-0.00394738	-0.000792029	0.00142556	0.00116715	0.00129846	0.000175847	0.00027871	0.000182283	-0.000229223	5.88362e-05	-0.000148051	-0.000270495	0.000264492	-9.4043e-05	8.84145e-06	-2.9271e-06
MR0022_TraceCoords	G31	0.0149755	-0.0155811	0.00668221	0.00292528	-0.00422938	0.00233481	0.00455335	0.000989491	0.000282124	-0.00161397	-0.00189899	-0.000110142	-0.00190588	-0.000425654	-0.00146802	-7.30154e-05	0.000109875	0.000319236	-9.39591e-05	-0.000278139	-6.76047e-05	-4.8158e-05	-0.000225371	1.26846e-05
MR0024_TraceCoords	G31	0.0094015	0.00505899	-0.00325098	-0.00424396	-0.00618225	-0.00483401	-0.00037317	-0.000195973	0.000709063	-0.000268698	0.000496138	-0.000937072	-0.00312083	0.000447806	0.000545134	0.000284427	-0.000678937	-0.000128529	0.000198585	-8.02601e-05	-9.54334e-06	0.000155679	4.19974e-05	2.66807e-06
MR0025_TraceCoords	G31	-0.0313195	-0.0335351	0.00744335	0.00241822	-0.0017601	-0.00338677	0.000966429	0.00128542	0.00116287	-0.000825602	-0.00225264	0.00224394	0.00163707	0.000203139	-0.00179433	-0.000248223	0.000134321	-0.000103918	0.000392573	-7.62345e-05	-0.00039527	0.000402529	-3.5196e-07	4.14236e-07
MR0027_TraceCoords	G31	-0.033367	-0.0110982	-0.000711777	-0.00634475	-0.00475516	-0.00248619	0.00192218	-0.000817742	0.00228375	-0.00111372	-0.00396234	0.000629917	0.000617523	-0.000445034	-0.00165912	-0.000401587	0.0002958	8.47995e-05	0.000300079	-0.000110946	0.000362518	0.000393979	0.000291409	-9.88213e-06
MR0028_TraceCoords	G31	0.050957	-0.00882053	-0.00165408	0.00873571	-0.00332218	0.000523406	-0.00247131	-0.00215223	0.00151129	0.000296467	-0.000267014	-0.000786959	6.83181e-05	-0.000234792	0.000931674	-0.000347258	-0.000199965	-0.000148619	7.42431e-05	6.48378e-05	0.000330519	0.000189727	7.68113e-05	-4.38984e-06
MR0029_TraceCoords	G31	-0.0443902	0.0020354	0.00524763	-0.00600287	-0.00179972	-0.00455905	-0.00237088	0.00452358	0.000485652	-0.000907643	-0.000664709	-0.0015759	0.000147804	0.00016701	-0.000847561	-0.000640843	-5.87592e-05	-7.21038e-05	-1.35787e-05	-8.67119e-05	-0.000183726	0.000249229	-1.61429e-05	-6.89263e-06
MR0030_TraceCoords	G31	-0.0760316	0.0179046	-0.00887385	-0.0169952	-8.59009e-05	-0.00349605	-0.00123793	0.00137496	0.00369243	-0.000902325	0.00015665	-0.00173192	-0.0032382	0.000547667	-0.000907768	-0.00120851	-0.000159308	-0.000399807	3.02723e-05	0.000138693	5.90646e-05	0.000422413	0.000317088	7.183e-06
MR0033_TraceCoords	G31	-0.016503	0.0176605	0.0122467	-0.000820087	-0.00218672	0.00712348	-0.000672514	-0.00046888	0.00322753	0.000138959	-0.0012712	-0.000941886	0.000961053	-0.00024105	0.00109398	-0.00010967	-0.000649277	0.000248923	7.84209e-05	-0.000325311	-0.000317492	0.000242302	-0.00023125	-7.25952e-06
MR0034_TraceCoords	G31	-0.0784175	0.0213743	-0.020716	0.00803271	-0.00465324	-0.000411653	0.000596477	-0.0026159	0.000523799	0.0017478	0.00256614	0.000546323	-0.00193292	-0.00165913	0.000575652	0.000586139	0.000817588	-0.000657131	2.65843e-05	-2.96645e-05	-0.000107098	-0.000144802	-0.000138802	-7.45389e-06
MR0035_TraceCoords	G31	0.0594062	0.00179612	-0.00149137	0.0138308	-0.00256317	-0.0015657	-0.000515414	0.00073065	0.00181796	-0.00193226	0.000797754	-0.00223723	0.000297965	-0.000450128	-0.00192376	-0.000723117	1.61702e-05	-0.000338032	-0.000186343	0.000200979	6.43225e-05	-7.52037e-06	-0.000437347	-1.24968e-06
MR0036_TraceCoords	G31	0.0554789	0.0268312	0.00187164	0.00259636	-0.000248462	-0.00619483	0.000914282	-0.00110136	0.000220814	0.00185428	-0.00107217	0.000193679	-0.000187509	-0.000822542	-0.000132806	-3.25578e-05	-0.000915654	0.00045667	6.49215e-05	0.000111592	9.16687e-05	-9.86282e-05	6.67452e-05	-9.35307e-06
MR0038_TraceCoords	G31	-0.0566509	0.0420396	0.01621	0.0134201	0.00279269	0.00449214	0.00366051	-0.000226919	-0.000991772	0.00290563	-0.0029771	-0.00167459	-0.00256403	0.00204691	7.65006e-05	0.0014647	-0.000373368	0.00106049	-0.000718969	2.32864e-05	-0.000643379	-0.00092787	0.000383389	-1.45122e-05
MR0040_TraceCoords	G31	-0.0421788	0.0139033	0.0261734	-0.00296741	0.00585529	-0.0198937	0.00660492	0.00592645	0.00947068	-0.00136282	3.9307e-05	0.00819799	0.00241362	0.00614306	0.00183999	-0.00187094	0.00329513	-0.000304684	-0.00234147	-0.000410512	0.000104381	-0.000299791	0.000559769	7.4789e-06
MR0041_TraceCoords	G31	-0.0769627	-0.0150941	-0.0056507	-0.00804352	0.000599494	-0.00948316	-0.0033066	-0.003384	0.000600844	0.000965801	0.000507631	0.000502302	-0.000658267	0.000252763	8.60406e-06	-0.00102863	0.000489092	0.000429047	9.16212e-05	0.000190352	-0.000161335	5.53321e-05	-3.73548e-05	-1.7958e-06
MR0045_TraceCoords	G31	-0.0287078	0.00805082	0.00373907	-0.0254559	-0.00248048	0.00982787	0.00311517	-0.00200444	0.00021791	0.000548628	0.00106672	-0.0010004	-0.000322812	0.00203783	0.000650337	-0.000248723	-0.000207188	-0.000140318	-0.000296606	5.0378e-05	9.2245e-05	0.000535314	-0.000282825	-1.2897e-05
MR0046_TraceCoords	G31	0.0600042	-0.0106913	0.0116726	-0.0140195	0.00376529	0.00314865	-0.000859891	0.00285809	0.00174727	0.000408447	0.000154182	-8.19446e-06	-0.00226857	-0.00100857	0.000765169	0.00038295	0.000428998	-6.44229e-08	0.000235496	-0.00012352	0.000114919	-2.19939e-05	-0.000110775	1.98054e-06
MR0047_TraceCoords	G31	0.0419028	0.0319116	-0.00296472	0.00122525	-0.00297533	-0.000939266	-0.00398706	0.00264235	-0.00261116	-0.00150914	0.000548417	0.00143878	-0.00106714	-3.98539e-05	0.000486524	-0.000362221	-0.000247408	0.000695974	-0.000193766	-0.00040788	-0.000183439	0.000258648	-0.000298223	-9.94137e-06
MR0048_TraceCoords	G31	-0.110578	0.0281779	0.00339786	-0.00464108	0.00932403	0.0044195	0.00539576	0.00234219	0.000100657	0.00104196	-0.00243731	-0.000357886	0.000930713	0.00127903	0.00224412	0.000464987	-0.000688768	-0.000748721	-0.00020764	0.000164525	9.35253e-05	-0.000175686	7.27456e-05	-5.92301e-06
MR0050_TraceCoords	G31	0.032556	-0.00118973	0.000988454	-0.0138717	-0.00296755	-0.000176334	-0.000216466	-0.0011084	0.00194868	-1.46462e-05	0.000536304	-8.40382e-05	-0.000451213	-0.000710569	0.000421247	0.000162507	0.000173744	0.000118058	0.000127309	-1.7343e-05	0.000136713	-0.00011232	-0.00018456	1.9657e-05
MR0052_TraceCoords	G31	-0.105193	-0.00178224	0.00754534	0.00330036	0.00780449	-0.000829037	0.0113254	0.000243414	0.00108149	-0.00203078	0.000571721	0.00392993	-0.00120713	0.000364637	0.00134596	0.000242396	0.00189065	-0.00135826	-0.000127844	5.05603e-05	0.000103524	-0.000214178	-0.000130742	-3.00773e-06
MR0053_TraceCoords	G31	0.0732639	0.00351443	0.0059347	0.00464694	0.0037685	0.00126298	-0.0144957	0.00550329	0.000776215	-0.00119488	-0.00193596	-0.00187325	-0.000150305	-5.1173e-05	0.000840721	0.00040077	0.00107824	-0.000454649	0.00037618	0.000234193	-0.000643374	7.60167e-05	-0.000191693	2.01415e-05
MR0054_TraceCoords	G31	-0.00887012	0.0160149	0.00546822	0.00750656	-0.00492326	0.00499173	-0.00125732	0.00453614	0.0022678	-0.00254216	0.000970216	-0.000876103	-0.00105379	-0.00080489	-0.000692639	0.000414471	3.10749e-05	-0.000269326	0.000144157	-6.58812e-05	-1.5949e-05	0.00025558	2.79923e-05	1.15915e-05
MR0055_TraceCoords	G31	0.0142824	0.00368894	0.00588337	0.00244481	-0.00455237	0.00266946	0.00322904	0.00177479	-0.000561355	-0.00240299	-0.0018738	0.000334286	0.000111026	-0.00117625	7.0547e-05	0.000235541	-0.000339867	5.33136e-05	8.15851e-05	0.00010531	-2.2936e-05	8.82293e-07	5.22112e-06	-1.36135e-06
MR0056_TraceCoords	G31	-0.125666	0.00828304	-0.0141756	0.000349094	0.00795911	0.00293309	-0.00257459	-0.000698677	0.00267309	-0.000627071	-0.00251762	-0.000561977	-0.00185867	-0.000452874	0.000699946	-1.12739e-05	-0.000300957	0.000127596	-0.000319168	-0.000164121	0.000310029	9.39035e-05	0.000217113	-3.03685e-06
MR0059_TraceCoords	G31	-0.118833	0.0396191	0.0018486	-0.00730112	0.0129751	-0.00276307	0.00177869	-0.00152148	-0.00428741	-0.000257073	-0.00179125	-0.00263574	0.000254046	0.000713134	0.00123072	-0.00022695	0.000580287	0.000510036	0.000600501	0.000278578	0.000145585	-0.000218368	-5.75293e-05	1.30786e-05
MR0061_TraceCoords	G31	-0.0834124	0.0203846	0.00442586	-0.00213191	0.00417281	-0.00500213	-0.00509197	-0.0023181	-0.000824436	0.000471352	-0.00153982	-0.000735261	-0.000360546	-0.000114885	0.000100673	0.000111517	-0.000148978	0.00042119	0.000230364	-5.28401e-05	3.17075e-05	-0.000196538	4.53014e-05	8.48968e-06
MR0065_TraceCoords	G31	0.0434114	-0.00789364	0.0207372	0.00530057	0.00306534	-0.0036396	0.00240485	-0.002041	-0.00123283	-0.0001057	3.92427e-05	-0.00121776	-0.000189716	-0.00161383	-0.00138519	-0.000235367	0.000149589	-4.22834e-05	-0.000311529	-0.000161744	0.000216532	3.1203e-05	8.53797e-05	3.10072e-06
MR0066_TraceCoords	G31	-0.0248074	0.0368703	0.0027324	0.00574691	-0.00399018	0.00221106	0.00309561	-0.000804852	0.000301491	-0.00178426	0.000848504	-0.000715392	-0.000631028	-1.31377e-05	-0.000749829	-0.000141823	-0.000589188	3.81862e-05	-3.86665e-05	-0.000190206	-0.000262881	-2.85679e-05	-0.000266822	-4.26548e-06
MR0068_TraceCoords	G31	0.113724	0.00459695	-0.0066262	-0.00397096	0.00878746	0.0043053	-0.000788467	-0.000494912	-0.00147814	-2.01284e-05	-0.000493586	0.00160675	-0.000683993	4.73182e-05	0.000251222	-0.000168114	0.000330984	-6.77226e-05	-0.000321241	-0.000191844	-0.000197809	-3.19222e-05	-0.000206014	-6.65823e-06
MR0069_TraceCoords	G31	0.0443062	-0.0079111	0.00502197	0.00451551	-0.00232806	0.00319172	-0.000573207	0.00489348	-0.000682358	-0.00380964	-0.00105074	-0.00131598	-0.00136511	-0.000561991	-0.000122094	-0.000119672	1.42845e-05	0.000149223	0.000248776	-0.000277329	-7.90887e-05	-0.000226648	-0.000109767	-1.21903e-05
MR0070_TraceCoords	G31	0.00230817	-0.00735409	0.00674503	0.00141573	-0.00450599	0.00966298	0.00281372	-0.00830995	-0.00260121	-0.00568636	0.000364174	0.00129955	-0.00081562	0.000818426	0.0022204	-0.000549409	-0.001019	-0.000486397	0.000139114	0.000132041	-0.0001606	3.89737e-05	-0.000129367	-4.70965e-06
MR0073_TraceCoords	G31	-0.031154	-0.0114274	-0.00442671	-3.77371e-06	-0.00619566	-0.00207378	-0.00139827	-0.00146063	0.00261745	0.00105444	-0.00139542	-0.000719889	-0.00131503	0.000276487	0.000272371	0.000150152	-0.000303638	2.76335e-06	-3.17719e-05	2.76378e-05	-0.000199244	6.85604e-05	-8.08863e-05	1.5622e-06
MR0076_TraceCoords	G31	-0.156369	0.0324658	-0.0112005	0.00557066	0.0199609	0.00942957	-0.00342447	0.00329763	-0.001962	0.000783653	-0.00205121	-0.00132129	-0.00141528	0.000278486	0.0012735	0.0010542	-0.00113479	-0.000630186	-0.000243492	0.000581821	9.68057e-05	5.0603e-05	0.000283377	-6.5668e-06
MR0077_TraceCoords	G31	0.0822968	0.0188687	-0.00512871	-0.0058765	0.00226397	0.0032169	-0.00246942	-0.000841432	-0.00189469	0.001628	0.000824044	0.00206518	0.00140656	-0.000161322	-0.000743232	-0.000466168	0.000678289	-0.000164791	-0.00040799	-0.000241918	-0.000205636	-8.68895e-05	-2.87699e-05	-3.12313e-06
MR0078_TraceCoords	G31	0.0385104	-0.0145585	-0.00857031	-0.002743	-0.00603725	0.000583661	-0.00194327	0.00309028	0.00305628	-0.00108488	0.000496856	-0.00218642	0.00057148	0.000114348	0.000553071	0.000870425	-0.000246179	-0.000147658	0.000337777	7.13177e-05	2.17048e-05	7.44544e-05	8.82304e-05	-9.39889e-06
MR0081_TraceCoords	G31	0.0202789	0.0043219	0.019047	0.000491234	-0.000140484	0.00453119	0.00548766	0.00152163	0.00459021	-0.00421932	0.000633667	-0.00135351	-0.000796756	0.000277894	0.000262248	-0.000568112	-0.000593248	-0.000413643	-1.3004e-05	0.000513082	-0.000302269	-7.85626e-05	-5.46677e-05	1.16805e-05
MR0082_TraceCoords	G31	-0.0198443	-0.00200378	0.0224493	-0.0131914	0.00197268	0.00429746	0.00374163	0.00517739	-0.00131578	0.0027769	-0.00182851	0.000759055	0.00300571	-0.000336253	-0.0016382	-0.00122997	-0.000276023	0.000193166	0.000299502	-0.000259436	-0.000634577	0.000440279	-8.60382e-05	-1.08355e-05
MR0083_TraceCoords	G31	0.0227537	0.000847213	0.00374127	0.00840645	-0.00463377	-0.000735384	-0.00082118	-0.000885582	0.000920429	-0.000115071	-0.000704583	-0.000850018	0.00138541	-0.000498873	0.000525243	-0.000204051	-0.000508863	-0.000108163	0.00010345	-5.20628e-05	6.22254e-05	3.37914e-05	-8.95587e-05	5.62618e-06
MR0085_TraceCoords	G31	0.0542807	-0.00600562	0.00685871	0.00231613	8.55647e-05	0.00396239	-0.00287183	-0.00461311	-0.00102198	-0.000800277	-0.00237062	0.00105525	-0.000100737	-0.000656392	0.000583326	-6.5153e-05	-3.91209e-05	-0.000568318	-0.000399423	0.000227722	-3.99572e-05	-0.000188889	-0.000110919	-7.58264e-06
MR0086_TraceCoords	G31	0.0220647	0.0343773	-0.00585912	0.00371888	-0.00551565	0.00163843	-0.00563716	0.000823145	0.000130691	0.00114813	0.00115833	0.00312934	-0.00131113	0.00122999	0.000435722	-0.000294236	0.000413087	0.000220204	7.45049e-05	1.67167e-05	0.00019001	-0.000239325	0.000266383	-1.14964e-07
MR0088_TraceCoords	G31	-0.0460192	0.00363435	0.00172595	-0.000756727	-0.00383705	0.00451095	0.000986164	-0.0036998	0.00104261	0.0017231	-0.00187579	0.000328841	-0.00051196	0.000182585	-7.98268e-05	-0.000111137	-0.000226494	8.77821e-05	-0.000284383	0.000207059	5.81882e-05	-4.53489e-05	-0.000227874	4.56782e-06
MR0089_TraceCoords	G31	-0.0414876	0.00852591	-0.00558558	-0.00719766	-0.00435231	-0.00865436	-0.00383133	-0.00117306	-6.25627e-05	-0.000921623	-0.0021912	-0.000155878	-0.0016796	-0.000314427	0.000879624	0.000522808	-0.000292366	-5.69863e-05	0.000344257	-0.000130693	0.000182138	-6.31092e-05	0.000231403	-7.29284e-06
MR0090_TraceCoords	G31	-0.033757	0.0248066	0.00805569	-5.95144e-05	-0.00225823	0.000460437	0.00476896	0.000604359	-0.00174381	0.000593943	-0.00118777	-1.65809e-05	0.000228756	-0.000611697	-0.00016797	0.000255647	-0.00036402	-0.000143105	-0.000143623	6.17365e-05	-0.00023089	-9.44535e-05	-7.75085e-05	3.11705e-05
MR0091_TraceCoords	G31	0.0680501	0.00483847	-0.000722792	0.0063879	-0.000485855	0.00156496	-0.000612626	-0.00215267	6.64485e-05	0.000687974	0.00364799	0.00101407	-0.00304493	0.00017326	-0.00128786	-0.00114337	0.000239112	-0.000329198	-0.000340297	-8.25983e-05	0.000212613	-0.000240763	2.07943e-05	1.48741e-06
MR0092_TraceCoords	G31	-0.0135085	0.0245778	0.0134452	-0.00675375	3.4308e-05	-0.00798426	-0.00127667	-0.00423298	-0.00189715	-0.00171463	-0.000459201	-0.000668069	-0.000173443	0.000295051	-0.000179848	0.000179728	-0.000517916	0.000600048	0.000118983	0.000418226	3.25759e-05	0.000128717	0.000104178	1.9421e-05
MR0093_TraceCoords	G31	0.0504995	-0.00147428	0.0118344	0.00526342	0.000597253	-0.00196292	0.00260305	0.000947501	0.00111261	-0.00439113	0.000129482	-0.000425102	-0.000751845	-0.000317818	-0.000890643	-0.00101919	-2.28201e-05	4.54597e-05	-0.000403089	0.000289414	-8.29914e-05	-0.000246894	-5.51797e-05	2.88518e-05
MR0094_TraceCoords	G31	0.00859161	-0.00392692	-0.00728243	-0.0209873	-0.00708709	0.00684946	0.00434632	-0.0017174	0.00185933	0.00145026	-6.5259e-05	-0.00116672	0.00187826	0.00171494	-0.00155779	0.000470915	0.000546206	0.00108976	-0.000823696	0.00116476	0.000208635	-0.000107598	9.82202e-05	8.68609e-06
MR0102_TraceCoords	G31	0.128766	-0.00145266	-0.0156647	-0.00318106	0.0112551	-0.00125115	-0.00296672	-0.00245438	-0.00317619	0.00238735	-0.00197368	0.00237192	-0.000347183	0.00231258	0.00144803	0.00191991	-0.00012917	-0.000834638	-0.00109597	-0.00074458	-6.59346e-05	-0.000284332	-0.000212501	-2.33002e-05
MR0103_TraceCoords	G31	0.0196428	0.00194418	0.00869156	-0.0015988	-0.00323397	0.00364206	0.00294524	-0.00160067	0.00291719	0.000386	-0.00049635	-0.000740942	0.000103618	-0.000463103	-0.000778751	-0.000121887	-0.000159569	-6.56555e-06	-8.44958e-05	-6.86934e-05	-0.000123344	-0.000105834	-0.000141937	1.92873e-05
MR0104C_TraceCoords	G31	-0.0336847	0.0169416	-0.0150539	-0.00340632	-0.00841197	-0.00386943	0.00299643	0.000270089	0.000309559	-0.00296395	-6.37083e-05	-0.00173612	-0.00137075	-6.07658e-05	0.000938965	1.89589e-05	-0.000388499	-0.000823276	-0.000143218	0.000237347	-0.000398009	-0.000414783	-4.46931e-05	2.00246e-05
MR0106_TraceCoords	G31	0.0515144	0.00103196	0.00819058	0.0138205	-0.000778037	0.00518782	-0.00271186	-0.00297015	0.00294824	0.00213926	-0.00103454	-0.000676987	0.00178493	-0.000783616	-0.00116237	-0.000667872	0.000197271	-0.000727952	-7.65202e-05	0.000142669	0.00016702	3.82445e-05	-5.26286e-05	-5.1696e-06
MR0108_TraceCoords	G31	0.0179814	0.0360336	-0.00199077	0.00458013	-0.00461558	-0.000102632	-0.00500022	0.00164837	0.000290349	-0.00112627	-0.00139982	0.000667119	0.000141844	0.000526787	-0.00227683	-0.000732511	0.000222424	6.38376e-05	-0.000166593	2.97439e-05	-0.000129008	-5.99882e-05	-0.000162748	-9.95677e-06
MR0109_TraceCoords	G31	0.0437682	0.040246	-0.00377298	-0.00242238	-0.00200429	0.00127123	-0.00481054	0.000522014	-0.000358305	3.87219e-05	0.000174768	0.00293431	0.00115396	0.00030339	-0.000187653	-0.00068475	-0.000277936	5.34032e-05	-7.54301e-05	-3.74762e-05	-2.78731e-05	-0.000135378	5.01876e-05	-1.28914e-05
MR0110A_TraceCoords	G31	-0.00253007	-0.0171804	0.00178338	-0.00646124	-0.00456663	-0.00536481	0.002133	-1.42118e-05	-0.00177444	-0.000518791	0.000463828	0.00103968	-0.00168962	0.000725068	-0.000443324	-3.69501e-05	-0.00033759	-8.45016e-05	-9.03523e-05	-0.000111531	-1.94605e-06	0.000155695	-0.000185812	-2.43909e-05
MR0112_TraceCoords	G31	0.0576714	0.0169414	0.00265791	0.0068291	-0.00108158	0.00572148	-0.00217459	0.00334767	0.00529538	-0.000274296	0.000487947	0.000849666	0.000967102	-0.000393744	6.93862e-05	-0.000207216	-0.000447943	-0.00024393	0.000564346	0.00011357	-8.22462e-05	-0.000332715	-2.48806e-05	-2.12895e-05
MR0115_TraceCoords	G31	-0.0353869	-0.00799606	-0.0046154	-0.00307872	-0.00675544	0.00666727	0.00245016	-0.00365147	0.00431371	0.00495142	-0.00172488	-0.00049915	-0.000135895	0.00118591	-0.000287882	0.00062931	-0.000454382	0.000565508	-0.000519218	0.000496347	0.000240022	0.0002949	-0.000450559	3.99801e-06
MR0118B_TraceCoords	G31	-0.0362983	-0.000304154	-0.00128539	-0.00969779	-0.00451387	0.00634602	-0.00329211	-0.00047263	-0.00313528	-0.00135366	-0.000238002	-0.000213469	0.000530077	0.000353345	-0.000212181	-0.000272289	-0.00020282	-0.000548453	0.000472976	0.000184096	7.32841e-05	2.70156e-05	3.86414e-06	2.33858e-06
MR0119_TraceCoords	G31	0.0689957	0.0136351	-0.00704493	0.0123503	-0.00228526	-0.00137313	-0.0012779	0.00326698	0.000301375	-0.00483867	0.00175288	0.000873517	-4.13472e-05	0.000545435	-5.9962e-05	-0.000594521	-0.000372997	0.000622066	8.75763e-05	-5.95959e-07	0.000534399	-0.00123259	-0.00023032	4.27475e-07
MR0120_TraceCoords	G31	0.000323378	0.0156153	-0.00751217	0.000610355	-0.00831086	0.00111941	0.00324739	-0.00252586	-0.000408691	5.23518e-05	0.000845173	0.000462795	0.000850806	-0.000311493	-0.00097124	0.000266355	-0.000112393	-0.00029247	0.000157492	-0.00017756	-3.08721e-05	9.37693e-05	7.74738e-05	3.80249e-06
MR0121_TraceCoords	G31	-0.0655434	-0.00300924	0.00890941	0.0045927	0.000487385	-0.00254631	0.00664928	0.000681958	-0.000425632	-0.00105813	-0.00176938	0.00225178	-1.59763e-06	0.000269838	-0.000578549	-0.00031158	0.000200998	-0.000459503	-0.000463216	-0.000366209	-1.0625e-05	0.000104067	-7.00051e-05	2.16674e-05
MR0122_TraceCoords	G31	0.0234801	0.0294386	-0.00616356	0.00417671	-0.00642304	0.00677134	-0.00283309	0.00210579	0.000427193	0.000378518	0.00020138	0.00267572	-0.00088462	0.00119302	0.000950418	-0.0007658	0.00060468	-0.000229975	-4.6588e-05	0.000396253	-0.000665446	0.00095762	0.000277901	-6.66451e-06
MR0123_TraceCoords	G31	-0.113648	0.0138527	-0.0128402	-0.00861508	0.00700828	-0.0106191	-0.00476675	0.00136028	0.00051833	0.00211897	-0.000973971	-0.00275353	-0.000809549	-0.00055082	0.000185529	-0.00101051	0.000480073	0.000705119	-0.00022764	0.000339868	-0.000264065	-0.00032507	0.000345597	7.60489e-06
MR0124_TraceCoords	G31	-0.230687	0.0315069	-0.00174663	0.0080373	0.0582646	0.0149292	0.00375781	-0.00950408	0.000956129	-0.00133263	0.00174694	-0.00261189	0.00281973	0.00525174	-0.00188123	0.00286294	-0.00086863	-4.60253e-05	0.00234997	-0.00204109	0.000209879	1.84478e-05	-0.00096431	1.23216e-05
MR0125_TraceCoords	G31	-0.0881666	-0.00990973	-0.00812203	-0.000804177	0.000605437	-0.00877263	0.00526976	-6.89834e-05	0.00170393	0.00260925	-0.000537471	0.00109679	0.000766948	-0.000929007	-0.0010839	4.61362e-05	0.000436666	-0.000386401	-3.64038e-06	0.000405637	-0.000254257	0.000115002	0.000103491	-3.24121e-06
MR0126_TraceCoords	G31	0.0252981	-0.0202454	0.0169271	0.00504037	0.000460798	0.00198005	-0.00220426	-0.00293377	-0.00119838	-0.00339363	0.000186267	-0.000122314	0.000664869	-0.000687478	-0.000721614	0.000212207	0.000211703	-0.000318206	0.000111446	0.000183502	-0.00019213	-5.19207e-05	-5.11248e-05	1.04465e-05
MR0130_TraceCoords	G31	0.0482932	-0.0256564	0.0270576	-0.00619221	0.00754115	0.00144858	0.00159263	-0.00269934	-0.00591132	-0.0033909	-0.00393779	0.00239475	-0.00161361	0.000524785	0.00129022	-0.00137055	-6.93287e-05	3.21605e-05	-0.000884288	-6.69924e-05	-0.000487839	-0.000700793	-0.000215004	1.21075e-05
MR01301_TraceCoords	G31	-0.0293126	0.0130336	-0.00143175	-0.00326871	-0.00516873	0.000118324	-0.00123755	-0.00307187	-0.0011023	-0.00318752	-0.00128084	0.000604894	-0.00074659	-0.000439696	0.000464073	0.00028115	-0.000263346	-2.91857e-05	1.12349e-05	0.000121756	-2.24269e-05	-9.81004e-05	5.57799e-05	4.94199e-06
MR0131_TraceCoords	G31	-0.0193321	0.0186083	0.00988905	-0.00198584	-0.00267347	0.00282989	0.00331251	-0.0057897	0.00099851	-0.000303282	3.57257e-05	-0.000108234	-0.00100967	0.000740702	-0.00039	-0.000211905	-0.000629817	-0.000405085	0.000296373	1.37303e-05	-0.000403354	1.54308e-05	-0.000138751	1.65009e-05
MR0132_TraceCoords	G31	0.0661548	0.00403082	-0.000850327	0.00772208	-0.00221943	0.0121039	0.0085815	0.000197016	0.000446474	-0.00214428	1.33249e-06	0.000871856	-0.00135979	-6.36948e-05	0.000626033	-0.00165351	-0.000370421	0.000779664	-0.000111395	0.000238624	-0.00028131	-0.000276393	-7.75551e-05	9.39472e-07
MR0133_TraceCoords	G31	-0.00948875	0.025638	-0.0155463	0.0138529	-0.0101635	-0.0020332	0.00165737	0.000474379	-0.00130478	0.0005268	0.00307988	0.00156897	0.000515204	-0.00050821	0.000989337	0.000431253	0.000504954	-0.000516919	0.000148886	0.000135585	-0.000283268	-6.88762e-05	-1.26232e-05	1.44132e-05
MR0135_TraceCoords	G31	0.0190971	-0.0172885	0.0063319	0.00614815	-0.00371722	0.00131113	-0.00145603	4.25119e-05	0.000989724	0.00112356	0.000817984	-0.00172437	0.00237692	-0.000822877	-0.00035425	0.00022257	-8.46101e-05	-6.4309e-07	0.000340035	-8.56522e-05	0.000182761	6.13974e-05	6.34582e-05	5.32164e-06
MR0137_TraceCoords	G31	-0.0484809	0.0226776	0.0124783	0.00294567	-0.000683013	0.0078428	0.00758685	-0.00191045	0.00548844	0.000620767	-0.000926982	0.000574874	0.000170781	0.00158658	1.67371e-05	0.000628446	-0.000434144	-0.000156466	-0.000372593	-0.000589261	-0.000214603	-0.00036246	5.17404e-05	2.43352e-05
MR0138_TraceCoords	G31	0.0250727	0.0273865	-0.0015671	0.00259189	-0.00515762	0.00615647	0.000600284	-0.00118205	-0.000452259	-0.000656491	0.00177592	0.00114958	0.00125476	-8.31016e-05	0.000368036	-0.00120789	0.000395121	-0.000344734	0.000381948	0.000258058	-0.000336716	-1.66236e-06	0.0002276	-8.80276e-06
MR0140_TraceCoords	G31	0.0260834	0.00819902	0.00272412	0.000261261	-0.00451163	0.00552781	0.000834143	-0.000868247	-0.00599392	-0.00195559	-0.00124295	0.000776419	-0.00227365	0.000134303	-0.0011106	-0.000991445	5.33986e-05	0.000208661	-0.000593698	-0.000308218	-0.000233392	-0.000254714	-0.000202261	-1.13635e-06
MR0141_TraceCoords	G31	-0.0233414	0.0611744	-0.00229377	0.0123831	-0.00160648	-0.00733005	-0.00896394	0.000275223	-0.00291048	-0.00257285	-0.000656649	-0.000267231	0.00143476	0.00193722	-0.000684508	0.000570393	0.000923605	0.00138443	-0.000684742	0.00113933	0.000485006	0.000294914	-0.000211918	8.18705e-06
MR0142_TraceCoords	G31	-0.028125	-0.0116911	-0.00231836	0.00184805	-0.00576485	-0.00593576	0.00219658	-0.00286102	0.00146439	-0.00073834	-0.00326708	0.000881855	0.00072553	-0.000554409	0.000767502	-3.66549e-05	0.0001232	-0.000150511	-4.51962e-05	-0.000129004	0.000239377	6.3385e-05	5.14375e-05	8.44847e-06
MR0143_TraceCoords	G31	0.00216018	0.0044478	0.01605	-0.00257461	-0.00174711	0.000993033	0.0150784	-0.00760001	-0.00181633	-0.000518376	0.00229354	-5.44859e-06	0.0024907	-0.000253583	-0.00114013	-0.000869077	-0.000539363	0.000199903	0.00013791	-2.19952e-05	-7.77587e-05	-0.000150764	-0.00014811	-2.7808e-05
MR0144_TraceCoords	G31	0.00127912	0.0120673	-0.00388516	-0.0291374	-0.00421613	-6.58269e-05	0.00146881	-0.000902671	0.00637153	-0.000359863	-0.00248487	0.000289231	-5.36045e-06	0.00254962	-0.000691381	-0.00101984	-0.000116891	0.000263392	-0.000142583	0.000126589	-6.73325e-06	-0.000199081	5.72362e-05	8.95177e-06
MR0145_TraceCoords	G31	-0.0156543	0.0113604	-0.0209209	-0.00732518	-0.00937454	-0.0108918	-0.00508984	-0.00180999	0.00085637	-0.00174509	-0.000104562	-0.00105699	-0.00149247	-0.0011121	0.000312932	-0.000190804	6.0663e-05	0.00019771	0.000451039	-0.000704241	0.00017131	0.000154579	-0.00013793	-2.75782e-06
MR0148_TraceCoords	G31	-0.0128217	0.0065382	0.00964189	0.00544979	-0.00347278	0.00372122	-0.00357047	0.00168737	0.00651363	-0.00235044	0.000786197	-0.00132391	0.00026553	-0.000183634	-0.00123059	0.000485524	-0.000233789	-0.000612378	0.000335613	-0.000550854	2.78208e-05	-0.000118577	-0.000262512	-1.73183e-05
MR0151_TraceCoords	G31	-0.142851	-0.0170771	-0.0157836	-0.00596288	0.0144232	0.00350092	-0.00573732	-0.00358953	-0.00205101	-0.000695033	-0.000211054	0.00162167	0.000471741	0.000712779	0.00120949	-0.0013099	-0.00135004	-0.000142305	0.000733043	0.000167235	0.000482859	-0.000408373	-0.000199476	1.44774e-05
MR0152_TraceCoords	G31	0.0185843	0.0425507	-0.00772874	0.00310192	-0.00473122	-0.00479785	-0.00724853	-0.000992315	-0.0021225	0.00238287	-0.000859766	0.00234416	0.000481259	0.000399398	0.000783129	-8.87031e-05	0.000863498	0.000371551	0.000181964	-4.8409e-05	0.000182927	-0.000226093	0.00017537	-1.06998e-05
MR0153_TraceCoords	G31	-0.0391256	-0.0236938	0.000651762	-0.0032607	-0.00313335	-0.00580351	-0.00077836	0.000187434	3.34913e-05	0.00163569	0.00108842	-0.000150915	0.00106588	-1.66027e-05	-0.000882199	-8.94767e-05	0.000238459	-0.000213603	0.000171554	4.076e-05	-0.000271277	0.000162191	4.94633e-05	-7.0313e-06
MR0155_TraceCoords	G31	-0.016561	-0.0122782	-0.00105227	-0.00917672	-0.00518021	-0.00681566	0.00589892	0.00190723	-0.00410144	0.00459384	0.000378301	-4.40934e-05	-0.000230062	0.000138042	-0.000613944	0.000238263	-0.000289941	-0.000192417	0.000293048	0.000172336	-0.000234324	-9.42995e-05	-0.000151862	-1.93289e-05
MR0158_TraceCoords	G31	0.0781374	-0.00868089	0.011042	-0.00517831	0.00576559	5.00573e-05	0.00300362	-0.00125542	0.000533079	0.000352886	0.000464523	-0.000776919	-0.000730876	-0.00145783	-0.000688635	-0.000378119	0.000219448	8.64477e-06	-0.000261878	5.23747e-05	0.00012577	-0.000255155	4.65432e-05	-1.02853e-06
MR0159_TraceCoords	G31	0.0661084	0.0294565	-0.0112436	0.00519889	-0.00257936	-0.00103505	-0.00288339	0.00633735	-0.000485425	-0.0026227	0.0028468	0.00293171	0.000203424	0.00124996	-0.000277442	-0.000250934	-0.000138046	0.000314043	0.000240448	0.000253259	-0.000305442	0.000201949	0.000176716	2.77733e-06
MR0165_TraceCoords	G31	-0.057295	0.037243	-0.00259508	-0.00912287	-0.000918087	-0.00627781	0.00574084	-0.00243595	0.00241599	-0.00210659	-0.0014705	-0.000539199	-0.000641382	0.00067435	0.00125566	-0.000461187	-0.000974229	-0.000308212	0.000416234	0.000367444	-0.000233803	9.00616e-05	-2.10588e-05	-6.05627e-06
MR0167_TraceCoords	G31	-0.0996383	-0.00820773	0.00501967	-0.00231358	0.00614358	-0.00091245	0.0114629	0.00662385	-0.00301284	-0.000194903	-0.0001598	0.00323789	-0.00186631	0.00192307	-0.000181531	-0.00012081	0.00078125	-0.00188487	-0.00037926	0.000726511	-0.000556305	0.000293908	-0.000183964	-3.19074e-05
MR0168_TraceCoords	G31	-0.0236836	0.00978943	0.00449235	-0.00296673	-0.00356579	-0.00687051	0.00147055	-0.00311453	-0.00118755	0.00171857	0.00167811	-0.0010531	0.000674327	0.000169895	0.000522116	-0.000592894	-2.9076e-05	-9.15719e-05	-5.62473e-05	-5.5474e-05	-0.000181934	-0.000355715	-0.000200793	-1.68495e-05
MR0169_TraceCoords	G31	-0.0280863	0.0298724	0.00700205	-0.00694757	-0.00201595	-0.00183816	0.0063676	0.00899171	0.00314213	-0.00347802	-0.00131551	0.000315794	0.000733135	0.000887123	0.00202166	-4.23736e-05	-8.5645e-05	-0.000357309	-3.12447e-05	0.000287313	-0.000164408	-1.97242e-05	-0.000236215	2.14956e-05
MR0170_TraceCoords	G31	-0.0536299	-0.0183417	0.00924252	0.0115053	-0.00114326	0.00539782	0.00153144	0.00651232	0.00188616	-0.00154279	0.00016795	0.000520508	-0.000199119	-0.000928771	-0.000788282	0.00133659	0.000102377	-0.000442481	-0.000368031	-0.000311087	-0.000153344	9.097e-05	8.58215e-05	2.10016e-05
MR0171_TraceCoords	G31	-0.0648105	-0.00756722	0.00539927	0.000965046	-0.000254866	-0.00652026	0.00989481	0.00477529	-0.00127111	0.000625001	-9.82306e-05	0.00121999	-0.00186725	0.000270501	0.000145859	0.000368104	0.000668699	-0.000861505	-0.000371381	0.000190401	-0.000207702	0.000165234	-1.10626e-05	-1.57354e-05
MR0172_TraceCoords	G31	0.0429545	-0.00940697	0.0132028	0.00214217	0.000385613	0.0133272	-0.00349646	-0.000306959	0.000367153	0.00022234	0.000372648	0.000575107	0.00132622	-0.00283575	-0.00202919	0.000489981	0.00195631	-0.000552649	0.000536954	0.000532848	-0.000554191	0.000242602	-0.000194572	9.8524e-06
MR0174_TraceCoords	G31	-0.103747	0.00681244	-0.0151046	0.00573738	0.00163473	-0.00691252	0.00611589	0.00318937	-0.000286853	-3.40818e-05	-0.00334589	6.57886e-05	-0.000545488	-0.00166679	0.00108644	0.00091079	0.000611162	-0.000613303	-0.000177423	0.000458132	3.9493e-06	9.87975e-06	8.16502e-06	6.71811e-07
MR0177_TraceCoords	G31	-0.00131828	0.000687442	0.0129506	0.00908852	-0.00310833	-0.006569	0.0144188	0.000926997	0.00578714	-0.0014602	0.00481478	-0.00135868	0.00228119	0.00116094	0.00202941	-0.000768032	-0.000810095	-0.000824963	-0.000263761	0.000445012	0.000282298	-9.53579e-05	1.75279e-05	-1.10603e-06
MR0178_TraceCoords	G31	-0.0548695	0.0277396	0.00300673	0.00558043	-0.00200055	0.00313998	0.00433144	-0.00759759	0.000356934	-0.000372819	-0.000410631	-0.00039446	0.00146174	-2.05044e-05	0.000462452	0.000275542	-0.000308885	-0.000193385	0.000242414	-0.000403395	-0.000255163	-0.000333181	-3.28998e-05	1.9921e-05
MR0179_TraceCoords	G31	0.0470074	-0.00112449	0.00834716	-0.00685387	0.000292293	0.00675728	-0.00455793	0.000435179	0.0031808	-0.00246837	-0.00260658	0.000626974	0.00325377	-0.00215691	0.000176182	0.000409803	0.000265409	-0.000892352	0.0003523	0.000101617	-0.000505551	1.31258e-05	-0.000291016	-1.98147e-05
MR0180_TraceCoords	G31	0.0216848	0.0292206	0.00546604	0.00686954	-0.00242622	-0.00422183	-0.00587378	0.00073398	-0.000659147	-0.00267177	-0.0024407	-4.11332e-05	-0.00018025	-6.64755e-05	0.000403051	0.000369787	-0.000403871	0.00049529	5.51979e-05	0.000487188	-0.000263094	9.23592e-05	0.000184731	-7.18731e-06
MR0182_TraceCoords	G31	0.0270092	0.011264	0.000638275	0.0181289	-0.00549361	-0.00256439	0.00116433	0.000172542	-0.00141816	-0.00197703	0.00110713	-0.000913975	-0.000955192	-0.00043126	-0.000540089	-0.000617153	-0.000306127	-0.000324885	-0.000209236	0.000401434	-0.000193482	0.000246777	0.000123395	1.02575e-05
MR0183_TraceCoords	G31	-0.043843	-0.0115775	0.0065867	0.00206582	-0.00255679	0.00117167	0.00209124	0.00119873	1.75915e-06	0.000594518	-0.00149666	0.000759017	0.000288538	-0.000144335	-0.000101737	-0.000215876	-0.000220811	2.75953e-05	-4.45609e-05	-5.98614e-06	-4.67712e-05	0.000100012	-2.08274e-05	-1.4831e-05
MR0185_TraceCoords	G31	-0.0103502	-0.000329443	0.00979078	-0.000340171	-0.00323953	-0.00125974	0.00249403	0.00165424	0.00129493	-0.00405493	-0.0018913	0.00076343	-3.073e-05	-0.000484602	-0.00114867	-0.000257604	-0.000664971	-0.000277369	1.83048e-06	-0.000377216	-2.98307e-05	-2.38895e-05	-6.85825e-05	1.70142e-05
MR0188_TraceCoords	G31	-0.00470882	-0.0144837	0.00373796	-0.00593923	-0.00423974	0.00063188	-0.00216769	-0.00424386	0.00290689	0.0045837	0.00219748	-0.000103624	0.00100155	0.000602018	-0.00149699	-0.000255314	0.000339319	8.8184e-05	5.45147e-05	0.000301297	-0.000166109	0.000127604	3.71688e-06	-2.73737e-05
MR0189_TraceCoords	G31	-0.111943	0.0270897	-0.0175771	0.00678915	0.00323551	0.00228436	0.00861405	0.00118375	-0.00446051	0.000197038	5.65686e-05	-0.000593983	-0.00166502	-0.00190192	0.000622195	0.00206786	0.00135886	-0.00132705	0.000214653	0.000364027	8.75046e-05	-1.64627e-05	-0.000170348	-1.10159e-05
MR0191_TraceCoords	G31	0.0389632	0.00793461	0.00794655	0.0100332	-0.00267206	-0.000737367	0.0117328	-0.000535906	-0.00122597	1.32276e-05	-0.00146019	-0.000475759	0.000433617	-0.00140095	0.000138102	-0.000942261	-0.00155235	0.00040898	-0.000153693	0.000485196	-0.000279734	-0.000125679	4.4891e-05	7.57805e-07
MR0192_TraceCoords	G31	-0.0183257	-0.0125559	0.0045861	0.000586652	-0.00437067	0.000271422	-0.000555632	0.00231044	-0.000154773	0.00156312	-0.00128195	0.000167929	-0.00111967	-0.00029045	-0.000493261	6.75152e-05	-0.000120445	-0.000230086	4.69372e-05	-0.000148269	0.000370201	-0.000285186	-3.29356e-05	5.89103e-06
MR0193_TraceCoords	G31	0.0696522	0.0533607	-0.0086362	-0.00144077	0.00177705	0.0018883	-0.00430692	0.0021661	0.00177412	-0.00131666	0.0034419	0.00504879	-0.00285593	0.00157075	3.66745e-05	-0.00233641	0.00104832	0.000898117	8.1439e-05	-0.000456922	-4.14522e-05	-0.000250795	0.000112726	-1.06604e-05
MR0194_TraceCoords	G31	-0.00991185	0.0133885	0.000138969	-0.0132995	-0.00463385	0.00278507	-0.0014063	-8.77934e-05	-0.00314554	0.000665447	0.00210292	0.00189672	-0.00124771	0.00176988	-1.39023e-05	-0.00131408	0.000235959	-0.000329802	-0.000434044	-0.000435033	1.25884e-05	-0.000340798	-4.49079e-05	4.7312e-05
MR0203_TraceCoords	G31	-0.00627311	-0.031843	-0.00222053	-0.00173225	-0.00579644	0.00279166	-0.000874833	0.0020253	0.00243941	0.00184619	-0.000213743	-0.00165893	0.000571574	0.00101498	-0.000638056	0.000387686	0.00020492	6.85892e-05	0.000170425	0.000166657	-8.18025e-06	-0.000218673	-0.000106563	2.01771e-06
MR0207_TraceCoords	G31	-0.107114	0.0250446	-0.0433055	-0.0278546	0.00200475	-0.0180644	0.00595192	0.003881	0.00342897	0.00171968	-0.000488484	-0.00342682	0.00318905	-0.00407009	0.000454562	-0.00364276	0.000271886	0.000302764	0.000180693	0.0010829	-5.12001e-05	-0.00147521	-0.000305014	-3.07154e-05
MR0209_TraceCoords	G31	-0.124796	0.00690645	0.00807097	-0.00170713	0.0155406	-0.0156616	-0.000469926	-0.000605044	0.000776482	-0.00142865	0.000599438	0.00168479	0.000465811	0.000997128	0.000210351	-0.0012651	0.00138822	0.000490541	-0.00020467	0.000155574	0.000106881	-0.000180754	-0.00017636	-8.37291e-07
MR0210_TraceCoords	G31	-0.0317304	-0.00445589	-0.00789586	-0.00522917	-0.00801028	0.0132193	0.00319054	-1.68653e-05	-0.00114868	0.00172843	-0.000447432	1.25964e-05	-0.00104915	0.00130289	0.000859302	0.000847859	0.000106084	-9.06132e-05	-0.000342111	0.000553814	0.000182089	6.38382e-05	-0.000222989	-1.0814e-05
MR0212_TraceCoords	G31	-0.124734	0.00424553	-0.0201703	-0.0102254	0.00672141	0.0112426	-0.00338263	0.000807976	0.00105018	-0.00332773	-0.00101492	-0.00243694	0.00104645	0.000390523	-0.000207419	-0.00167199	-0.0011419	-0.000377243	-0.00041201	-0.00016198	0.000315797	-0.000384105	0.000288976	6.00577e-06
MR0213_TraceCoords	G31	0.00465543	0.0148928	1.50618e-05	0.003801	-0.00594099	0.00213265	-0.00355839	-0.00206103	0.00448623	-0.00167701	0.000193545	-0.000583795	0.00133914	-0.000805138	-0.00099722	0.000293464	0.000146397	-0.000314022	7.59913e-05	-9.60278e-06	-0.000134796	-4.54985e-06	4.65471e-05	-2.63989e-06
MR0215_TraceCoords	G31	-0.1303	0.0562989	0.023403	0.00548934	0.0241173	-0.0101348	0.0165168	-0.00889855	0.00115789	-0.00109768	-0.00162556	-0.00173795	0.00442801	0.00585646	0.00112444	0.00231601	0.00335053	0.000368987	0.000452881	-0.00108353	-0.000272412	-0.00162516	-0.000624912	4.88996e-06
MR0216_TraceCoords	G31	-0.00455899	-0.0106695	0.0141454	-0.00960456	-0.00131181	0.00477207	0.00163421	-0.00106073	-0.00122056	0.00121117	-0.000801974	0.00128632	2.09869e-05	0.000979468	8.98526e-05	2.67882e-06	9.9019e-05	0.000205627	-7.52844e-05	7.75551e-06	4.29915e-05	-0.000357963	-0.000364714	-9.31225e-06
MR0217_TraceCoords	G31	0.0423776	0.0104044	-0.00626742	-0.00425579	-0.00448378	-0.00274392	-0.00114894	0.000486585	-3.30292e-05	0.000506625	-0.00204309	0.000148869	0.000696698	-0.000785679	0.000162059	-0.000286777	-0.000391315	-0.00100474	-0.000237191	0.000534492	0.000393714	-4.60918e-05	-0.000394406	8.9537e-07
MR0218_TraceCoords	G31	-0.0627391	0.00293243	0.00995488	-0.00562938	0.0014567	-0.00851592	0.0103236	0.00145571	-0.00107343	-0.00309814	0.00230529	0.0025466	0.00252693	0.000824603	0.000827542	-0.000974078	0.00136048	-0.000538049	-0.000107122	6.80365e-05	5.31402e-05	3.99879e-05	-9.31512e-05	-1.73132e-05
MR0219_TraceCoords	G31	-0.00656491	-0.0351746	0.0059947	0.000154977	-0.00296251	-0.00431429	0.00384179	0.00272229	0.00552879	-0.000235139	-4.19487e-06	0.00214562	-0.00111066	0.000527628	-0.00200056	0.000105679	0.000880183	-0.000383972	0.000113523	9.61118e-05	-0.000123205	0.000291143	5.98472e-05	1.30812e-06
MR0220_TraceCoords	G31	-0.096027	-0.0231253	-0.0239057	0.00351331	-0.00197935	0.00867774	-0.00137721	0.00517728	0.00308555	0.00468691	-0.00520005	-0.000462771	-0.000933157	-0.000491426	0.0014507	-0.00041406	-0.00110818	5.36994e-05	-0.00126371	0.000420165	0.00032442	1.24927e-05	-0.000250119	3.58582e-08
MR0221_TraceCoords	G31	0.0204413	0.0483996	-0.0104998	0.00319214	-0.00544096	-0.00358887	-0.00565488	0.00492161	-0.000306065	-0.000823247	0.00335137	1.52557e-05	0.00189982	0.00184392	-0.000655647	5.56959e-05	0.000804026	0.00117361	-0.000194388	0.000434036	0.000185038	0.000337291	-0.000160328	1.92944e-06
MR0223_TraceCoords	G31	0.0524624	0.00619585	-0.00388039	-0.0025907	-0.00345807	0.00519348	-0.00158517	-0.00237234	-0.000381138	0.00294147	0.000976784	0.00049509	0.00185319	0.000148444	-0.00015333	0.000745283	0.000479877	-0.000231405	-0.000193821	-2.30011e-05	4.74624e-05	-3.11781e-05	-8.7474e-05	-1.03897e-05
MR0224_TraceCoords	G31	-0.0454324	-0.00816708	0.00926129	-0.00727651	-0.000208007	-0.00446783	-0.001223	0.00325736	-0.000474426	0.00141465	0.00196221	0.00016297	-0.000445614	0.000512598	0.000177045	-0.00010955	-7.47134e-05	-0.000429782	0.000178045	8.32488e-05	-6.57761e-05	-9.48362e-05	0.000133879	1.78293e-06
MR0226_TraceCoords	G31	-0.0323023	0.00213343	-0.00160689	-0.0106853	-0.00428591	-0.00896014	0.00482657	0.000629114	-0.00092966	0.00214997	0.00176174	-0.000657428	4.44273e-05	-0.000636282	0.000186342	3.32011e-05	0.000506014	-0.00063059	-1.63704e-05	0.000116107	0.000499894	-0.000146928	0.000148548	-1.57721e-05
MR0227_TraceCoords	G31	-0.0139559	0.00600122	-0.000493747	0.0108706	-0.00725653	0.00123299	0.00584221	0.000551276	0.00330333	-0.00239431	0.0016002	0.00133343	-0.00291674	-0.000438417	-0.000161276	0.000338715	-0.000394878	6.39764e-05	0.000255987	0.000279786	-0.000105791	-6.75843e-05	-4.7493e-05	-2.76673e-05
MR0230_TraceCoords	G31	0.0246746	0.020204	-0.00788869	-0.00690584	-0.0060254	0.00455365	-0.00605035	-0.00096961	0.000761165	0.00119041	-0.000304177	0.00242385	-0.00194808	0.000406091	-0.000924135	8.65772e-06	0.000546633	-0.000538667	0.000321382	-0.000203574	-0.00026406	0.000276895	0.000225945	1.55931e-07
MR0231_TraceCoords	G31	0.0330805	0.0321398	0.00719181	0.00713454	-0.00131497	0.000238256	-0.00380792	0.00277248	-0.00224056	0.00198817	0.000784994	1.43717e-05	-0.00138059	0.000741976	0.00125258	-0.000102279	-3.26822e-05	0.000716639	-8.03046e-05	0.000186142	-9.79358e-05	-0.000178966	8.79192e-05	5.54269e-07
MR0232_TraceCoords	G31	-0.107279	-0.0268423	-0.00803103	0.00897478	0.00479922	0.0107208	-0.00440146	0.0050198	-0.00571299	-0.00344349	-0.000880941	0.00130996	-0.00202015	0.000117711	-0.00051655	0.000388673	-0.00144285	-0.000510185	0.000228736	-2.82768e-06	0.000315247	7.41589e-06	0.000471325	-1.85588e-06
MR0233_TraceCoords	G31	0.00083096	-0.0165786	0.00868338	-0.00164148	-0.00225822	-0.0104483	-0.00047295	0.000160952	0.001848	-0.000917654	-0.00081224	0.000104912	1.48825e-05	0.000561212	-0.000135789	-0.000394402	-8.58394e-05	-0.000371021	-0.000226459	-0.000332372	0.000128212	-0.000130871	5.10088e-05	1.32608e-05
MR0234B_TraceCoords	G31	-0.0621366	-0.0428138	0.00191557	0.00439784	0.00146361	-0.00530277	-0.00723934	0.00439262	0.000438371	-0.000538927	-0.000483431	0.00153318	-0.000623088	0.00135127	0.00046347	-0.000740143	-0.000353474	-0.00018063	-0.000124728	-0.000390234	0.000116809	-0.000412924	3.23198e-06	1.06788e-05
MR0236_TraceCoords	G31	-0.0503461	0.00387114	-0.00589821	0.00804128	-0.00592357	-0.00354302	0.00652937	0.00198573	0.0027492	0.000351849	-0.00235043	-4.25782e-05	-0.000989577	-0.0006638	0.00111012	0.00100163	-0.000637527	-0.000440763	-0.000168769	8.83797e-05	-5.80296e-05	0.000273301	6.43799e-05	-1.56155e-05
MR0237_TraceCoords	G31	0.0667437	0.0212641	-0.00114653	0.00401547	-0.000672538	0.00382724	0.00378361	-0.00270577	-0.000382354	-0.00641425	0.000332794	0.000252024	-0.00142871	0.000731812	-0.000469125	-0.00241366	-0.000915402	2.02516e-05	-0.000211463	0.000323488	-0.000796728	-0.000128378	-0.000206308	2.18719e-05
MR0238_TraceCoords	G31	-0.128551	0.0254479	-0.0127462	0.00272792	0.00916419	0.0109484	-2.98325e-05	0.000374535	0.00442729	0.00117038	-0.00173005	-0.000406814	0.000871963	-0.000641052	0.00051342	0.00131189	-0.000602639	-0.00032163	-0.000262844	-0.000469217	0.000347636	-0.000237179	4.66709e-06	-1.9765e-08
MR0239_TraceCoords	G31	-0.0653308	-0.00637161	-0.0189379	-0.00621205	-0.00641005	0.0015955	0.000945462	-0.0036589	0.00292545	-0.00225169	0.00120298	-0.00132818	-0.000209287	0.000356149	0.000114302	-6.33179e-05	0.000127966	0.000328694	-0.000350181	0.000232059	-5.01916e-05	0.000140913	0.000117457	-2.73915e-05
MR0240_TraceCoords	G31	-0.017358	-0.0244054	0.00275959	-0.00315166	-0.0043841	-0.00205213	0.00157609	-0.0012106	0.00359383	-0.00276613	5.09958e-05	0.000263917	-8.29529e-05	0.000672357	-0.00164634	9.36676e-05	0.000380656	0.000124782	-1.61246e-05	-0.000134258	-0.000288402	4.16107e-05	4.7922e-05	-9.16556e-06
MR0242_TraceCoords	G31	-0.0417754	0.00631855	0.00362294	-0.00238811	-0.0028882	-0.00184153	-0.00200642	0.00162829	-0.000128083	-0.00213815	0.000976236	-0.000390992	-0.00143474	-0.000199825	-0.000567929	7.45588e-05	-0.000243823	-0.000308943	0.000169433	0.000223004	-0.000104065	4.40584e-05	1.66064e-06	-3.52543e-07
MR0246_TraceCoords	G31	-0.137066	-0.00520254	-0.0233964	-0.000792579	0.00956521	0.00435968	-0.00481443	-0.00177014	0.00064671	0.00190677	0.000131929	-0.000970574	-0.00139072	-0.000658657	0.00136041	-0.0016062	-0.000900335	0.000756466	-8.13411e-05	3.24182e-05	-0.000445028	0.000101043	-0.000396659	1.35813e-05
MR0250_TraceCoords	G31	0.0468002	-0.0092718	0.00185193	0.0151024	-0.00409173	0.00390368	0.00888196	0.00174122	0.00222775	0.0015435	0.00055662	-0.000233588	-0.00225646	-0.000782013	-2.18172e-05	-0.000619274	-0.000165079	0.000334719	1.46056e-05	0.000135612	0.000559511	-0.00032366	0.000137053	-2.29418e-05
MR0251_TraceCoords	G31	0.0196586	-0.00596105	-0.01269	-0.00547638	-0.00959595	0.00646723	0.00469915	-0.00168326	0.00151323	5.54186e-05	0.000310509	-0.00107499	0.00147887	0.000986963	-0.000254476	0.000757224	0.000159525	0.000899335	-0.000239419	0.000336856	-3.36775e-05	0.000231227	0.000106977	-6.32281e-06
MR0252_TraceCoords	G31	-0.0069688	0.0315433	0.00659281	0.0104896	-0.00345949	-0.00160195	-0.00359513	0.00132162	-0.00316902	-0.00109725	0.00200226	-0.00172372	-0.00266735	0.0015197	0.000424703	0.000643222	0.000167761	0.00116625	-0.000730825	-8.35158e-05	-0.000243215	-0.000342679	-8.89799e-05	1.61554e-05
MR0254_TraceCoords	G31	-0.0445364	0.00143689	0.0159039	0.00544723	0.000273612	0.00347713	-0.00148001	-0.000579381	-0.00146066	-0.00272464	0.00425851	-0.000118709	-0.00122346	0.000578268	-0.00110829	3.07156e-05	-7.73649e-05	-0.000317748	0.000491066	0.000501846	-0.000222828	4.70125e-05	-0.000124574	2.67954e-05
MR0256_TraceCoords	G31	-0.0179276	0.025498	-0.00799484	0.0102683	-0.00822106	0.00409874	0.000960894	-0.0031864	0.000732704	0.0037274	0.0031439	0.000719912	0.000240024	9.39248e-05	-0.000710658	-0.000347268	0.000686112	-0.000560141	-0.000184863	-0.000534815	-4.3641e-05	-0.000296005	-8.64083e-05	-5.76109e-06
MR0257_TraceCoords	G31	-0.0343353	0.0371176	-0.000274204	0.00716339	-0.00343369	-0.00438485	-0.00393157	0.00217191	-0.000415854	0.000229611	0.000631007	-0.000878934	0.000442567	-0.000506366	0.000236618	0.00120343	0.000208907	0.000550991	-0.000161848	0.000428312	4.45952e-05	0.000114749	-0.000117479	2.20671e-05
MR0258_TraceCoords	G31	-0.0622315	0.0223884	-0.0147879	-0.0129494	-0.00505086	0.00896783	0.00340306	-0.00473646	-0.00245769	-7.45233e-05	-0.00440674	0.000103511	0.000354918	0.0012825	0.000718458	-3.84561e-05	-0.00014447	-0.000284157	0.000244972	0.000518232	0.000469481	0.000201101	-0.000212696	-1.24983e-05
MR0261A_TraceCoords	G31	-0.0772472	-0.00448957	-0.0182872	0.00289306	-0.00454925	-0.00586917	0.00817807	0.00646682	-0.000740854	0.00334488	-0.00632102	-0.000247488	0.00204924	-0.00188619	0.00337068	-0.000330472	0.000360553	-0.00010936	-4.46956e-05	0.00046404	-8.83859e-05	-0.000216234	-0.000263159	1.26308e-06
MR0263_TraceCoords	G31	-0.0459385	-0.0044372	0.00629303	-0.00788352	-0.00170697	-0.00654615	0.00864542	0.000376419	0.00416954	-0.00370229	0.000508241	0.00282641	0.0030376	0.000953818	-0.00160282	-0.00128373	0.00131417	-0.000648429	-0.000387352	-0.000630948	-2.26265e-05	0.000425453	0.000304984	1.22793e-05
MR0264_TraceCoords	G31	-0.0120035	0.0205142	0.00768206	0.00797275	-0.0041139	-0.00115448	0.00862054	-0.00400804	0.0014935	0.00226168	0.00443377	-0.00188929	0.00036069	-0.000664711	0.000406485	0.000310949	-5.64328e-05	-0.000396426	-7.96114e-05	-0.000292242	0.000143411	-0.000642393	-0.000326259	2.05094e-05
MR0265_TraceCoords	G31	-0.0759212	0.0134886	-0.00593021	-0.0164728	8.75898e-05	0.004278	-0.00253237	0.0017231	-0.00139761	0.00172642	-0.000901084	-0.00228937	0.000507623	0.000389303	-0.000486991	-0.00123988	-7.48388e-05	-0.000394945	0.000182392	0.000122116	0.000161919	-6.87915e-05	0.000132692	2.0243e-05
MR0267_TraceCoords	G31	-0.0322572	0.0449189	0.0132986	0.00732767	0.00108806	0.0014924	-0.00743459	0.000608259	0.000163986	0.000200827	-0.000974727	-0.00166489	-0.000880622	0.00129161	-0.000740463	0.000677446	-0.000122308	0.00128275	-0.000299551	0.000182907	-0.000616599	0.000122096	9.17554e-05	9.85739e-06
MR0269_TraceCoords	G31	0.0302845	0.0112743	0.00732017	-0.00339612	-0.00176175	-0.00388443	0.000210995	-0.000626032	-0.00397049	-0.00444633	-0.00122375	-9.0464e-05	0.00202694	-0.00120567	0.000473783	0.00010707	-0.000669124	0.000270202	-0.000469	-2.88221e-05	-0.000100055	-9.48031e-05	-8.78774e-05	1.63999e-05
MR0271_TraceCoords	G31	-0.0608131	0.0208622	0.00994175	-0.00953886	0.00246802	-0.00866056	0.00228273	0.00384089	0.000120082	-0.00199002	0.000223436	0.000750478	-0.00154035	0.000396993	-0.00167931	0.000130451	-0.00030951	-0.000188327	0.000177074	0.000266993	0.000168623	0.000365858	0.000269341	-2.24571e-05
MR0272_TraceCoords	G31	0.0485262	0.00110788	0.00439712	-0.000619228	-0.0020433	0.00202666	0.00502753	0.00255171	-0.000113123	-0.000202329	-0.0012794	-0.000456917	-0.00223239	-0.0011874	-0.00108535	2.80232e-06	-0.000397031	0.000816859	-4.07122e-05	-0.00065339	0.000352014	-0.00126279	-0.000362982	-9.06179e-06
MR0274_TraceCoords	G31	0.00538844	0.0303538	-0.00898925	0.00428963	-0.00747083	0.000162845	-0.00308077	-0.000184584	0.000506688	-0.00105791	-0.00162623	0.00249191	-0.000523299	-0.000497769	-0.00125418	0.000192956	0.000381261	-0.000126777	0.000196976	-0.000135215	-1.20746e-06	-0.000266453	0.000125388	-3.52277e-06
MR0275_TraceCoords	G31	0.0229761	0.0347861	-0.00345478	-0.000712758	-0.00449454	0.00161973	-0.00454695	0.00269361	6.41743e-05	-0.00360822	0.000901344	0.00134	0.000908636	-0.000657204	-0.000936582	-0.000556971	-0.000236837	0.000180167	9.36349e-05	0.000115662	-0.000133464	0.000225937	-0.000123381	3.7104e-06
MR0276_TraceCoords	G31	-0.0187503	-0.017278	0.00435429	-0.00433488	-0.00374655	0.0006475	-0.00186839	0.00227282	0.000724522	-0.00188981	0.000243304	0.000126849	0.00081805	-0.000450898	0.00194806	-0.000377016	-0.000268902	0.000121317	-0.000125332	-0.000400341	-4.79523e-05	-1.88394e-05	-6.25477e-05	1.00589e-07
MR0277_TraceCoords	G31	-0.00633983	-0.0131879	0.00955067	-0.00957915	-0.00239628	0.00164776	-0.000524363	0.00169028	-0.00220979	-1.20197e-05	-0.000533434	0.000310729	0.000605839	0.000341031	0.000480665	-0.000937008	0.000243138	0.000711623	0.000390271	0.000102563	-0.00015313	0.000269808	0.000110375	2.43052e-05
MR0279A_TraceCoords	G31	-0.0797997	-0.00423818	-0.0124492	-0.00992109	-0.00268262	0.00998206	0.00218887	-0.00277511	0.000995463	-0.00110975	-5.75164e-05	-0.000352304	0.00062095	0.00123605	-5.01843e-05	8.24239e-05	-0.000439026	0.000201329	-0.000361776	0.000387011	0.000538268	0.000235025	-0.00023036	-1.0921e-05
MR0281_TraceCoords	G31	0.0299551	-0.0179006	0.00347995	-0.00865239	-0.00197937	-0.00405989	-0.00441071	-0.00309939	0.00171089	0.000541242	-0.000422182	-0.000493074	-0.000870363	0.000305405	0.00138652	0.000677543	0.000348779	-0.00015691	-2.7723e-05	-3.08443e-05	0.000119566	4.4655e-05	-0.00023135	5.66831e-06
MR0283_TraceCoords	G31	-0.00865156	-0.0316266	-0.0116859	-0.00496655	-0.00886263	0.00504484	0.00597699	-0.00538152	-0.00169995	-0.00184991	0.000130809	-0.00201487	0.00352392	0.0017633	-0.000846667	0.000783214	0.000605325	0.000730776	2.25565e-05	0.000261905	-0.000289739	0.000407233	5.72605e-05	2.09236e-06
MR0286_TraceCoords	G31	-0.140904	-0.018239	-0.00950131	0.0107095	0.0151289	0.00391611	-0.0132882	0.0100721	0.0033148	-0.00138135	1.37772e-05	0.000410181	0.00138728	-0.00218538	0.000670947	-0.000203552	-0.00280161	0.00086831	-0.00172457	0.000262811	-1.13518e-05	-0.000263823	-0.000229821	-3.0735e-05
MR0288_TraceCoords	G31	-0.0456157	-0.025617	-0.0169169	0.00078701	-0.0087445	0.00706617	0.00260711	-2.43089e-05	0.000321161	-0.00353864	-0.000197507	-0.00153377	0.00373074	-0.00017942	-0.00145347	0.000746003	0.000291629	0.000548675	-0.00062662	0.000315781	-0.000122197	-0.000105236	0.000474769	-4.2558e-06
MR0292_TraceCoords	G31	-0.0784788	0.00358134	-0.0151943	-0.00259218	-0.003844	0.0156961	-0.00224998	0.00151765	0.00120394	-0.00360937	-6.81728e-05	0.000690032	0.00037397	-0.000165691	0.000648983	-3.64162e-05	-0.000975866	-0.000723627	-0.000454018	1.56061e-05	0.000336107	7.42217e-05	0.000150065	-2.39224e-05
MR0293_TraceCoords	G31	0.0786231	0.00678895	0.0014586	0.00669039	0.00160886	0.00551179	0.00238938	0.00239249	0.00223493	0.00201258	0.00207961	-0.000980271	0.000199488	-0.000626509	0.00176262	-0.00135889	5.27989e-05	0.000314368	0.000482882	-1.68174e-06	0.000185397	-2.13065e-05	9.66167e-05	1.57038e-05
MR0294_TraceCoords	G31	0.012753	0.00525087	0.00132893	-0.00239639	-0.00586502	0.000532404	0.00913266	0.001379	0.00180839	0.000291287	0.00168278	0.000297498	-0.00299991	-0.000215188	-0.00117908	0.00039148	-0.00127263	-5.45056e-05	1.79078e-05	0.000265848	0.000119879	-0.000364479	-0.000105106	-4.47754e-06
MR0301_TraceCoords	G31	-0.068796	-0.0175172	-0.00195058	-0.00784877	-0.000240494	-0.011386	0.00732523	0.00337075	0.00195487	0.00168943	0.000863106	0.00337778	7.91401e-05	0.00150325	-0.00130684	-0.000363645	4.73988e-05	-0.000777916	0.000369422	0.000833205	-0.000413408	-0.000107518	-0.000239619	-4.58065e-05
MR0302_TraceCoords	G31	0.0680541	0.00303354	0.00411522	0.00924642	0.00120758	-0.000806014	-0.00566682	0.000761474	0.000204863	-0.000569833	-0.000786438	-0.00139006	-0.000123832	-1.9108e-06	0.000408487	-0.000902986	2.00809e-05	0.000142728	0.000173955	3.59326e-05	6.65136e-05	5.75485e-06	-5.03317e-05	-5.51713e-06
MR0303_TraceCoords	G31	0.0314284	0.00731003	0.0184601	0.00864282	0.00109893	0.00112132	-0.00307417	-0.00410669	-0.00348597	-0.00062051	0.000270693	-0.00110103	0.000148841	-0.00100756	0.000348603	-0.00120959	-0.000370074	0.000297913	-0.000654777	-0.000128786	0.000149225	-0.000167674	-0.000140024	-3.10397e-06
MR0305_TraceCoords	G31	-0.0164719	0.0475008	-0.000340199	0.00692974	-0.00334503	-0.00582831	-0.00327094	0.00378129	-0.00523409	-0.00293992	-5.88368e-05	-0.000260714	-0.000930473	0.000757991	-0.000804181	0.00123486	0.000324724	0.00118932	-0.000562914	0.000605184	0.000242611	0.000295088	-0.000284169	-3.78366e-06
MR0306_TraceCoords	G31	0.0687043	-0.00516377	0.00690243	-0.00236046	0.0030929	-0.00550903	-0.00123153	-0.00186841	0.00156828	-0.00293632	-0.000416021	-0.000634712	0.000364267	-0.00154177	-5.72205e-06	0.000556235	-0.00015741	-0.000246379	0.000129158	0.000630068	-0.000105756	-4.3356e-05	0.000159299	-2.9241e-05
MR0310_TraceCoords	G31	-0.0352092	-0.0135498	-0.00104128	-0.00537573	-0.00398121	-0.0100418	0.00264816	0.000949856	-0.0037154	0.00212129	0.00018813	-0.00052883	0.0011725	-0.000781614	0.000167453	0.000138455	0.000584642	-0.000180965	0.000437886	0.000482026	9.9266e-06	-0.000151216	0.00013598	-1.13602e-06
MR0311_TraceCoords	G31	-0.0698025	-0.0153941	-0.00144964	-0.00525528	-0.000569119	0.012558	-0.00809899	0.00318774	0.000481887	0.000714998	0.000613979	-0.000395573	0.00104572	0.000169447	0.00146027	-0.000479107	-0.00128628	0.000226374	-0.000130363	-0.000206441	0.000421961	5.88408e-05	3.55219e-05	-2.43824e-05
MR0313_TraceCoords	G31	0.0167273	-0.0215987	0.0129732	0.000712684	-0.00128948	-0.00114632	0.00142368	-0.00259836	0.000137534	0.00254776	0.000844437	-0.00129304	-0.000288754	0.00134071	0.000264143	-0.000139234	-7.37831e-05	-1.49306e-06	0.000308422	0.000107298	4.39805e-05	-8.51386e-05	0.000177693	-1.90215e-05
MR0314_TraceCoords	G31	-0.111194	-0.00338305	0.00301726	-0.00118329	0.00843825	0.00799287	-0.00272956	0.00145266	-0.000261427	0.00146959	-0.00237734	0.000400477	0.00249756	0.000149319	0.000691518	-0.000456354	-0.00120098	0.000501469	0.000170942	-0.000140966	0.000293252	0.000285497	0.000140142	-1.09638e-05
MR0315_TraceCoords	G31	0.0345915	0.0106622	-0.00206178	-0.00765714	-0.0039584	-0.0026907	-0.00106595	0.00128671	0.00150557	-0.00270697	-0.000887697	-0.000986948	-0.000839185	-0.000277353	0.00162014	4.67047e-05	-0.00108472	0.000203003	0.000643951	0.000153886	-0.000373636	0.000263251	0.000209764	-1.78195e-05
MR0318_TraceCoords	G31	0.0168445	-0.00280081	0.00611816	-0.00597553	-0.00307585	-0.00451833	0.00122397	-0.00239818	-0.000530727	0.000251604	0.00087952	-6.4162e-05	-0.00168261	-1.41531e-05	-3.071e-05	1.91874e-05	-0.000206857	8.00979e-05	0.000114388	6.56249e-05	0.00010858	-5.11665e-05	7.79905e-05	-9.7012e-06
MR0319_TraceCoords	G31	0.0480068	0.00413576	0.00425589	0.00918698	-0.0013918	-0.000685812	-0.00742639	-0.00379638	0.000844347	0.00319949	-0.000499199	-0.00049406	-0.000867752	0.000344788	0.000972869	-0.000473882	0.000222806	-0.000462498	-0.000286144	0.000242777	0.000117387	-0.00015965	8.29691e-05	-9.52287e-06
MR0325_TraceCoords	G31	-0.152546	-0.00709784	9.0413e-05	0.00589898	0.0208763	0.00847691	-0.00626208	0.0013998	-0.000608921	0.00333463	0.00224293	0.00259868	0.00216253	-0.00116823	-0.000159939	0.00101923	-0.0019882	0.000459264	0.000237837	0.000226467	0.000352651	-0.00045435	0.000139454	-6.00149e-06
MR0326_TraceCoords	G31	-0.040012	-0.0139812	0.0112393	0.000669784	-0.000897823	0.00148807	-0.0009875	-0.0043084	-0.00218208	-0.00141013	0.00146933	0.000874298	-0.000657896	0.00142189	0.000990889	0.000136584	-0.00104781	-0.000581721	0.00069436	0.000433158	-0.000614001	0.000365999	-0.000178259	-7.72275e-08
MR0330_TraceCoords	G31	0.102255	0.00286357	-0.000358705	0.00854667	0.00732453	-0.00237213	-0.00389183	-0.00290902	0.000322574	0.00208156	0.00131378	-0.00201038	0.000864096	0.000643714	-0.000703716	-0.00147243	7.94449e-05	-0.00107394	-0.000250263	0.000284686	0.00031307	0.000598752	4.96335e-05	1.24236e-05
MR0337_TraceCoords	G31	-0.040687	-0.0114916	-0.00339998	-0.00377964	-0.00553017	0.00484696	0.00293469	-0.00363122	-0.0035748	-0.000278071	-0.00168628	0.000460361	-0.00288379	0.000862244	-0.0015936	-0.000423677	-0.000304701	-0.000355651	-0.000153068	0.000213226	3.11082e-05	0.000591495	0.000138744	-8.37888e-06
MR0341_TraceCoords	G31	0.0740138	0.00559085	-0.00455135	0.00733068	-0.00041529	-0.000771427	-0.0021688	-0.00259867	-0.000712765	0.00160651	-0.00309712	0.00102686	0.000498821	0.00080466	0.000672404	-0.000537842	-3.57176e-05	-0.00021709	-0.000308652	-7.06882e-05	7.20798e-05	0.000229586	-0.000143193	-8.5701e-07
MR0342_TraceCoords	G31	0.00100707	-0.0040258	0.00493553	-0.00668588	-0.00339928	-0.000782634	-0.00480624	-0.00480184	-0.00336541	-0.00159845	-0.00108106	-2.11587e-05	0.000115056	-0.00128306	0.000152182	-0.00033601	0.000287386	-1.03142e-05	0.000258366	-0.000630622	-0.000344797	-0.000120806	-0.000180569	8.98679e-06
MR0345_TraceCoords	G31	-0.0749202	0.0145754	0.010955	-0.00878694	0.00404103	0.00141699	0.0011522	0.00166742	-0.00131355	0.00453009	0.00115554	-0.000919103	-0.000227913	0.000843517	0.000346148	0.000148406	6.105e-05	-0.000277229	0.000215664	-6.55914e-06	-0.000172608	-0.000166113	-6.15918e-05	-6.89662e-06
MR0347_TraceCoords	G31	-0.0669243	-0.0123363	0.0105385	-0.000496804	0.00207043	-0.00469891	0.00273807	0.0023202	0.0021558	0.00120021	-0.000847284	0.00209932	-0.000143918	0.00102641	0.000376273	-0.000686396	0.000607848	-0.000254491	-9.91325e-05	-8.84599e-05	-0.000208989	0.000261658	0.000163701	-3.08033e-05
MR0351_TraceCoords	G31	0.0178871	-0.00657654	0.0122188	-0.0011224	-0.00155548	-0.00578029	0.00347635	-0.00179832	0.00264475	0.0021011	0.00192694	-0.000833786	-0.000508439	-0.000283382	-0.000965642	0.000446875	-0.000246672	-0.000351395	9.45793e-06	0.000219128	0.000169459	4.31127e-05	-7.15587e-05	-4.24574e-06
MR0353_TraceCoords	G31	-0.0174738	-0.0134629	-0.00043663	-0.000137983	-0.00571058	-0.00114525	-0.00162124	0.000848746	0.00304658	-0.000606315	0.00131265	-0.00104141	-0.0014528	-0.000468962	-0.000683866	0.000273053	0.000130318	-6.24713e-05	5.39128e-05	-9.37101e-05	-1.33865e-05	-3.17604e-05	0.00013938	-3.68176e-06
MR0356_TraceCoords	G31	-0.0504238	0.0158226	0.0181327	-0.00621008	0.00208126	0.00976533	0.0026327	0.00195914	-0.00218148	0.000414079	-0.00183562	-0.000215946	-0.00056226	0.000864196	-0.000909098	-0.000404647	-0.000502236	0.000263839	0.000137566	-0.000174762	-5.62041e-05	2.70604e-05	-0.000144761	-9.91073e-06
MR0357_TraceCoords	G31	0.0677475	-0.00206132	0.0134603	-0.0060257	0.00447989	0.00613197	0.00107742	-0.00269673	-0.00024761	-0.00153126	-0.00143384	-5.92839e-05	-0.00293679	-0.00141136	0.000170452	-0.000188431	0.000788015	0.000376907	-0.000312365	0.000479064	0.000242903	-0.000509929	-0.000109458	4.08954e-06
MR0358_TraceCoords	G31	-0.132011	-0.0316976	-0.00614906	-0.00770713	0.0161835	-0.00528909	-0.0158395	-0.00139137	-0.00201565	-0.000271356	0.00290987	0.00245338	0.00100689	0.000522267	-0.000185497	-0.00373037	-0.00187212	0.00173981	0.00137503	0.000549909	-0.000392081	-0.000468573	-0.000429433	5.83673e-06
MR0361_TraceCoords	G31	-0.0569752	-0.0178987	-0.0166183	-0.00815211	-0.00534784	-0.00994024	0.00234484	0.00114451	-0.00469196	-0.000109546	0.00277044	-0.00196046	0.0012772	-0.00128511	0.000211588	-3.99133e-06	0.000312811	-0.00058827	0.000169496	0.000777211	-0.000491761	-0.000445077	-0.000144688	-2.03052e-05
MR0362_TraceCoords	G31	-0.0468508	-0.0208398	-0.0124044	-0.00300267	-0.00755962	0.00923552	0.00284169	-0.000984267	-0.00305927	-0.000556799	0.00134885	-0.0016446	-0.000502664	0.00176046	-0.000508143	0.000436271	0.000263356	9.5602e-05	-3.78639e-05	0.000268449	-8.89503e-05	-6.6547e-05	0.000206332	6.12147e-06
MR0364_TraceCoords	G31	-0.0436848	0.00825065	-0.00466348	-0.0131836	-0.00270456	-0.0124117	-0.00396166	-0.00489072	-0.0037165	0.00160639	-0.000181562	-0.000490389	-0.00107597	-0.00095447	-0.000244415	-0.000470051	-0.000172719	-0.000167385	0.000452086	0.000165046	-0.000130795	-0.000273251	0.000157116	6.52712e-06
MR0367_TraceCoords	G31	-0.00439517	0.00398963	0.0146456	0.00145091	-0.00228784	-8.24832e-05	0.00994457	0.00143671	-0.00305963	0.00332963	0.00117931	-0.000559126	-0.00160871	-0.000636783	0.000672184	9.34106e-05	0.000109217	0.000175032	-0.000115417	-4.34834e-05	0.000350108	-2.96265e-05	0.000101171	-6.05885e-06
MR0368_TraceCoords	G31	0.0852104	-0.00556467	-0.0115643	-0.000407804	-0.000373008	0.00525282	0.000635408	9.13851e-05	0.0017232	0.00119309	0.000265392	-0.00026598	0.000868667	0.000231107	9.35719e-06	-0.000151737	0.000491333	9.22278e-05	0.000118643	0.00018625	7.91505e-05	0.000414344	7.02349e-05	-4.83494e-06
MR0369_TraceCoords	G31	0.115159	0.0103823	-0.0073044	0.00287602	0.00905884	0.00056257	-0.000858723	-0.00454999	1.2068e-05	0.00215504	0.00237683	0.000735804	-0.000725715	0.000567086	0.000538597	-0.0019627	-0.000331392	-0.000845739	-0.000958334	-0.000134377	6.86005e-05	0.000190598	0.000324166	1.83373e-06
MR0372_TraceCoords	G31	-0.0436275	-0.0386614	0.0113483	-0.000998736	0.000798761	0.00310587	0.000939723	0.00691992	-0.000453252	0.00240643	0.00146242	0.0015152	0.00134832	0.00104863	-0.00200246	-0.000455893	-0.000238749	-0.000548231	0.000212267	0.000305213	-8.01671e-06	0.000243187	0.000309615	-1.3164e-05
MR0373_TraceCoords	G31	-0.081483	0.00104916	-0.00154814	-0.0038485	0.000809237	-0.00176733	0.00363915	6.20496e-05	3.18527e-05	-0.000348246	-0.00054725	0.000304961	-0.00273502	0.000447087	0.000216059	-5.83915e-05	-0.00017513	-0.000725449	0.00014333	0.000100138	-0.000188323	0.000253316	-0.000122781	-6.54061e-06
MR0375A_TraceCoords	G31	-0.0406964	0.00278601	0.00425461	0.00252826	-0.00285745	-0.000621756	-0.00660729	-0.00153382	0.00103996	-0.000444352	-0.000166095	-0.000834314	0.00226921	-0.000866192	0.000226858	0.000313719	-0.000358135	1.10101e-05	0.000145886	-1.86411e-05	0.00015836	-0.000234568	0.000120637	-4.13001e-06
MR0375B_TraceCoords	G31	0.0225344	-0.015184	0.000927857	-0.00568469	-0.00412828	-0.000831812	-0.00183031	-0.00297324	0.0012024	-0.000670095	-0.000443369	-0.00101783	0.000314348	7.51746e-05	0.00104759	4.68398e-05	-0.000130302	-3.3896e-05	-0.000376813	0.000109109	-0.000293894	-5.61878e-05	-4.09355e-05	-2.28321e-06
MR0376_TraceCoords	G31	-0.127444	0.0237586	0.0238899	0.00246706	0.0212532	-0.00742668	-0.00841332	0.00505148	-0.000462043	-0.00360617	-0.000199296	-0.00123705	0.00162125	0.00335237	-0.00280184	0.00110757	0.000966069	0.00252405	-0.00124015	0.000606371	0.00063201	0.000922126	-0.000236	1.03877e-05
MR0377_TraceCoords	G31	-0.0662233	0.0413962	0.0126928	-0.0056194	0.00438559	-0.00233253	0.00941369	-0.000436324	0.000331135	-0.00205549	0.00119468	-0.00222938	-0.00153732	0.00196469	0.00156023	0.00104829	-0.000519374	-0.000488171	0.000117586	0.000403345	-0.000592642	0.000343842	-9.03499e-05	-3.37029e-06
MR0382_TraceCoords	G31	-0.127735	0.0102597	-0.0100704	0.00130406	0.00971863	0.00302816	-0.00257905	0.00239514	4.0339e-05	0.00262855	0.000753563	-0.00196668	-0.000257927	-0.00126709	-0.000494807	-0.00017351	-0.000160817	-0.000186174	-0.000535047	-2.35878e-05	3.97638e-05	-0.000221269	-6.67445e-05	4.34081e-06
MR0384A_TraceCoords	G31	-0.00166962	0.0164809	-0.00263785	0.00864007	-0.0066232	-0.0019883	-0.00480659	-0.000148446	0.00038964	0.00090107	-4.27502e-05	-0.000596525	0.00121835	-0.00088653	-0.00105871	-9.07663e-05	9.81236e-05	-0.000151322	3.94047e-05	-0.000152763	3.05462e-05	0.00021272	7.35474e-06	1.40593e-05
MR0384B_TraceCoords	G31	-0.135584	0.0104288	-0.00481063	0.00569109	0.0129462	-0.00156909	0.00987017	0.00300416	-0.000767805	-0.00187972	-0.00125593	0.00091357	-0.00255092	-0.000537108	0.00194145	0.000752841	0.000974311	-0.00103415	-0.000529558	0.000499748	-0.000374316	0.000301308	-5.65792e-05	-1.05975e-06
MR0387_TraceCoords	G31	-0.0382674	-0.00809602	0.021902	-0.00427026	0.00275567	0.00160826	-0.00292415	-0.00237606	0.000360426	-0.00246624	0.00183362	0.00194064	-0.000750877	0.00101878	-0.000433837	-0.000344562	-2.5316e-05	1.10772e-05	0.000348705	6.51264e-05	0.000117272	5.3852e-05	2.07357e-05	-1.46275e-05
MR0388_TraceCoords	G31	-0.0185948	0.0239186	0.000330502	0.000502329	-0.00525456	-0.0016838	0.00418875	-0.00325989	-0.000188928	0.00109137	0.0029794	-0.0014509	0.000309071	-0.00039718	7.29031e-05	0.000175637	-0.000464376	-0.000385618	0.000368587	-2.18982e-05	-0.000209592	-3.40067e-05	-4.15828e-05	9.56638e-07
MR0389_TraceCoords	G31	-0.023897	0.00746149	0.0216378	-0.00745854	0.000723472	0.00728539	0.0129856	0.00889519	-0.00284941	0.00291002	0.00185442	-0.00107499	8.99047e-05	-0.000255145	-0.000871923	-0.00114549	0.000534794	0.000167472	-0.000341592	-0.000773125	-0.000331711	-0.000301342	-0.00038495	-6.11609e-06
MR0390_TraceCoords	G31	0.0187529	0.0238447	-0.00767158	0.0128464	-0.00716543	-0.00561217	-0.00341518	0.0016445	-0.0017414	-0.00195593	0.000942951	0.00126165	-0.00114769	0.000241855	-0.000214986	0.000288999	0.000117732	0.000241937	-0.000207837	9.94067e-05	0.000270693	-2.08619e-07	-0.000187388	-3.43113e-06
MR0392_TraceCoords	G31	0.11326	0.00459449	-0.0115322	0.000254478	0.00676389	0.00422819	0.000323015	0.000167345	0.000946075	-0.00186601	-0.00165346	0.00237536	0.00287953	-0.000660031	-0.00127725	0.000462035	0.000384744	-0.000170029	9.29147e-06	0.000226638	-0.000769447	-1.74174e-05	-0.000215736	-1.13623e-05
MR0395_TraceCoords	G31	0.0701643	0.00393722	-0.0108775	0.0158835	-0.00422141	0.00792172	0.0046006	-0.00208972	0.000526501	-0.000945751	0.00365075	0.00226126	0.00177501	0.000351417	5.37814e-05	-0.00217379	0.000314946	-0.000241614	-0.00010058	0.000240333	4.85027e-05	-8.72619e-05	0.000105553	1.5765e-05
MR0401_TraceCoords	G31	-0.0671992	-0.00179561	-0.00848506	-0.00260732	-0.00371695	0.00317367	0.000936115	0.00461915	-0.000844083	0.0029114	-0.000394208	-0.00183465	3.58905e-05	-0.000743821	-0.00110764	-0.000266175	-0.000256148	-0.000822074	-0.000460048	0.000158649	-0.000291134	-0.000174467	-3.33933e-05	1.32576e-06
MR0403_TraceCoords	G31	0.0665476	0.0275944	-0.000184599	0.00611451	0.000226965	0.00386378	-0.00357909	0.0017154	0.00354592	0.000835614	0.00170857	0.00134633	0.00144333	0.000460056	0.000788722	-0.00119607	7.13706e-05	0.000486314	0.000202156	0.000341094	5.74895e-05	0.00028902	5.41968e-06	-4.50937e-06
MR0404_TraceCoords	G31	-0.112881	-0.0148647	-0.000292	-0.00732482	0.0100754	-0.00910838	-0.00301886	0.00265731	-0.00217538	0.00110524	0.00190364	0.000767685	0.00153193	0.000609975	0.00119235	-0.00204943	0.000414334	0.000197816	0.000204013	0.000513867	-0.000246644	-0.000357673	-2.07735e-05	-7.80977e-06
MR0407_TraceCoords	G31	-0.099922	-0.0141342	0.00542569	0.00851558	0.00611411	-0.00466057	0.00483513	0.00195083	-0.00122134	0.000613358	-0.000122314	0.00187668	0.00072546	0.00045541	0.000467981	0.000462733	0.000676	0.000427295	-0.000497251	0.000135338	-0.000650167	0.000313772	0.000280188	-3.12582e-06
MR0409_TraceCoords	G31	0.0378268	-0.00460529	0.00727371	-0.00310329	-0.00174192	-0.00058007	0.00201272	-9.93329e-05	-0.000309728	-0.00019603	-1.6513e-05	-0.000675936	-0.00116613	-0.000795968	-0.000489773	-0.0003209	-2.9198e-05	0.000480461	-1.63028e-05	-8.04328e-05	0.00027218	-0.000424608	-0.000134778	5.67386e-06
MR0410_TraceCoords	G31	-0.0239122	0.000539122	-0.00455771	-0.0109284	-0.00604203	-4.86116e-05	-0.000487105	0.0049827	0.00121321	-0.000890242	-0.00362971	-0.00141828	-0.00112659	-0.000180858	-0.00215332	-0.000773919	-0.000648468	-0.000361736	2.85265e-05	-6.77113e-05	-0.000218597	-2.34953e-05	5.20397e-05	-1.05998e-05
MR0411_TraceCoords	G31	-0.0132302	-0.020869	0.00907259	0.00306828	-0.00250064	0.00410714	-0.0062316	0.000576035	-0.00243186	0.000652477	-0.000723828	0.00101342	-0.000125905	-0.00111835	0.000547582	0.00117649	0.000545242	-0.000781864	0.000903313	0.000599975	-0.000284386	-5.11633e-05	-5.19136e-05	4.74962e-06
MR0414_TraceCoords	G31	0.0449066	0.0124262	0.0200221	0.000303249	0.00251097	0.0144972	0.00783622	0.00719681	0.00412291	-0.00414974	0.00186655	0.000521099	-0.0044356	-0.00264349	0.00114219	-0.00129266	0.00108445	-6.99479e-06	0.00080151	0.000474338	-2.15267e-05	-0.000454976	5.71894e-05	3.86673e-06
MR0416_TraceCoords	G31	0.106993	0.0113043	-0.0131959	0.00243894	0.00477154	0.00016119	0.00155528	-0.000146705	-0.00166217	-0.002416	-0.000573748	0.0035255	0.00125062	-0.000116569	-0.000978175	-0.000267138	-0.000269333	-7.08261e-06	-0.000238683	0.000278769	-0.000154705	-0.000195024	-5.02672e-05	-1.87512e-06
MR0420_TraceCoords	G31	-0.160692	0.00294963	-0.0269879	-0.00503795	0.0172914	0.00555965	-0.000851063	0.00318864	-0.00496567	-0.0093902	0.000674172	-0.0045838	0.003394	-0.00165777	-0.00109643	-0.00178626	-0.000205091	-0.000547762	-6.78667e-05	0.000180766	0.000585705	-0.000196407	0.000488447	-1.20571e-05
MR0421_TraceCoords	G31	-0.0796738	-0.000966214	-0.00285564	0.0123604	-0.000729581	-0.000358438	1.16117e-05	0.00199778	-5.1447e-05	0.00339158	-0.00236269	-9.80247e-05	8.86065e-05	-0.00227693	-0.000469874	-7.77149e-05	3.32186e-05	0.000451941	-1.35823e-05	-0.000304102	-0.000100972	0.000378833	0.000376081	6.46585e-06
MR0422_TraceCoords	G31	0.0585226	0.015804	0.00766022	0.00110529	0.000661468	0.00061197	0.00587862	0.00267916	0.00235656	-0.000735996	-0.00276805	0.000573583	0.00110364	-0.00199237	3.48546e-05	-0.000750819	-0.000901301	0.0010075	0.000232873	-0.000180029	-0.000179267	4.47801e-05	-4.65028e-05	1.05839e-05
MR0424_TraceCoords	G31	-0.112354	0.0208908	0.0109232	0.00759439	0.0108576	0.0071562	0.000956888	0.00342503	-0.00164801	0.00266865	0.000951698	-0.00166076	0.000158461	0.000198539	-0.000327139	0.00147931	-0.000225514	-0.000182947	-2.1669e-05	-0.000158135	-0.000400866	0.000296009	-0.000193446	1.68147e-05
MR0426_TraceCoords	G31	-0.0401976	0.00621615	0.0154663	0.00810874	0.00077776	-0.00876155	-0.00605748	-0.00273389	0.00232686	-0.000394004	-0.000406768	-0.000983892	0.000647163	0.000394759	0.000101663	0.000597527	-0.00060658	0.000218792	8.1191e-05	0.000202191	3.68992e-05	0.000258902	7.97685e-05	4.37076e-06
MR0429_TraceCoords	G31	0.0469529	-0.00379186	0.0133826	-0.00372278	0.00286502	-0.00590411	-0.00517618	-0.00731249	0.00213784	-0.00605406	0.000388839	-0.00109124	-0.00133912	-0.00195934	0.00156014	-0.000352742	0.000954993	-0.00128642	0.000426613	0.000909795	0.000134317	-0.000399146	0.000318303	7.03428e-06
MR0430_TraceCoords	G31	0.0729904	0.00932337	-0.016669	0.00583059	-0.00388518	-0.00255372	-0.000246006	0.000852009	0.0018905	0.00124597	6.63384e-05	0.00127914	-0.000819477	0.00130297	-0.000664709	-0.000323085	-0.000366507	-0.000494698	0.000534523	-0.000147612	-8.34752e-05	-0.000110211	0.000185385	-1.16267e-05
MR0431_TraceCoords	G31	0.0287698	-0.00548003	0.00547777	0.00142744	-0.0030076	-0.0023827	-0.000411252	-0.00258391	-0.000643028	-0.000170967	0.00173362	-0.000554044	0.00225535	-0.000486448	0.00197762	2.77439e-05	-0.000285716	-4.90338e-05	-0.000332753	1.81135e-06	0.000334554	-0.000115842	9.74667e-05	1.73842e-05
MR0434_TraceCoords	G31	-0.0224701	-0.0287838	0.0216003	-0.00190194	0.00283929	-0.00568723	-0.00180936	0.00192103	0.000367751	0.0009091	5.37659e-06	0.00344977	-0.000357622	0.00149577	0.000698083	-0.000342943	-7.49364e-05	8.35584e-05	0.00063477	-0.000265114	-6.70645e-05	0.000263566	0.000152728	4.93119e-06
MR0435_TraceCoords	G31	-0.0732382	-0.000704408	-0.012089	-0.000642769	-0.00308286	-0.00951319	0.00220512	0.0028123	0.00388583	0.00143644	-0.00166752	-0.00114199	-0.00150428	-0.00131085	-0.0010899	-0.000330622	1.56808e-05	-0.000244886	-0.00107257	8.14502e-06	-0.0003275	0.00029662	-8.34717e-05	1.67376e-05
MR0437_TraceCoords	G31	-0.0451978	-0.00324479	0.0027996	-0.0025277	-0.00312573	0.010059	-0.00289449	-0.00100422	-0.00202641	-0.0022119	-0.00351578	0.00195811	-0.000859462	-6.63505e-05	0.000680312	-0.000725136	-0.00107208	-0.000738226	-7.31971e-05	1.11666e-05	0.000493927	-6.2951e-05	0.000376803	-3.4325e-05
MR0438_TraceCoords	G31	-0.0224402	0.0328774	-0.000564796	-0.00611229	-0.00436962	0.00398771	0.000548303	0.00101451	-0.00204704	-0.000389111	-0.00115514	-0.000256748	-0.00115147	0.000152346	-0.000943252	-9.61034e-05	-0.000542036	-0.000397621	0.000266544	-0.000230271	-0.000365576	0.000303151	-8.77185e-05	-1.40197e-05
MR0439_TraceCoords	G31	0.0792884	-0.010789	0.00563915	0.00131245	0.00400466	0.000623622	0.000427029	-0.00378859	0.00146488	-0.00204654	-0.00125007	-0.00183307	-0.000210627	-0.00151445	0.000253497	-0.00074027	-0.000152889	-1.79666e-05	-9.41065e-05	0.000236123	-0.000807885	7.69262e-05	4.72364e-05	-1.64075e-06
MR0442_TraceCoords	G31	0.0418391	0.00716462	-0.00391263	0.00531128	-0.00472508	0.00120522	-0.00330567	-5.48173e-05	0.00257319	0.00161469	0.000269331	-7.59796e-06	0.0013617	-0.0013683	0.000861921	-5.89064e-05	0.000251655	-0.000625182	0.000670558	-4.6006e-05	0.000317614	9.24359e-06	0.000206593	-9.57716e-06
MR0443_TraceCoords	G31	-0.012054	0.00469052	0.00879753	0.00727095	-0.00405979	0.00706755	-0.000783439	0.000608352	0.000179559	-0.000684017	0.0032856	0.000273914	-0.00435481	-0.000110546	-0.00114247	-3.658e-05	5.92214e-05	-0.00084205	-0.00025497	-0.000162985	6.55758e-05	0.0002346	0.000296688	-1.18458e-05
MR0445_TraceCoords	G31	-0.0176976	0.00746983	-0.00296903	0.00389362	-0.0069321	-0.00890754	0.0103272	0.00118616	-0.000294774	-0.00122094	0.0029351	-0.0010585	-0.000531802	-0.0010808	0.00173502	0.000349739	-0.000349385	0.000487617	0.000117472	3.99463e-06	-0.000132835	-0.000102046	-0.000521118	-6.77701e-06
MR0447_TraceCoords	G31	0.0162284	-0.0119283	0.00756918	0.00273263	-0.00310693	-0.00424012	0.00108389	0.000619735	-0.00224086	0.00142191	0.00134808	-0.0014545	0.00161773	-0.00174329	-0.00113869	-0.000433702	-0.000159682	-0.000142534	0.000337953	-0.000605717	-0.000110761	0.000597429	-2.0249e-05	1.98636e-05
MR0448_TraceCoords	G31	0.00859726	0.0319164	-0.00386864	-0.00296265	-0.00565279	0.0033708	-0.00157441	0.000601265	-0.00490854	-0.00255895	0.00184414	0.000559803	-0.00115237	0.00109336	-0.000171653	-0.000527521	0.000366015	-0.000279131	-0.000349952	-0.000586015	5.735e-05	-0.000210288	0.000132129	-2.11009e-05
MR0449_TraceCoords	G31	-0.00935634	0.0234501	-0.0163713	0.00748143	-0.010214	0.0032204	-0.00212015	-0.000432242	0.000143152	0.000978751	0.00102882	0.00290686	-0.00127989	-3.99948e-05	-0.000103411	-0.00049555	0.000514498	-0.00059519	-0.000227878	-0.000133867	-0.00018529	-0.00021423	1.29396e-05	-2.64522e-06
MR0450_TraceCoords	G31	-0.0536866	-0.00445399	-0.000398722	-0.00771456	-0.00294432	-0.00586401	0.00676606	0.00168243	0.00321689	-0.0025508	0.00401365	-0.00086277	0.000678923	0.00176033	0.000312744	-0.000358864	0.000304914	-2.01849e-05	0.000133944	-3.12802e-05	-0.000331352	-0.000114019	-6.37235e-05	-3.06841e-05
MR0452_TraceCoords	G31	-0.0685701	-0.00144436	0.00585608	-0.00645772	0.00162745	-0.00690404	-7.21959e-05	0.00276181	0.00492673	0.000301385	0.00150891	-0.000202065	0.00306439	-0.000318427	0.000385069	-0.000717177	0.000176515	-0.000196471	-0.000494523	-0.000511625	0.00030376	-0.000342271	-2.14715e-05	-1.23486e-05
MR0457_TraceCoords	G31	-0.0872672	0.00907268	-0.00561823	-0.0121162	0.00113809	0.00595751	0.00297128	-0.00425803	0.00200898	0.00424846	0.000964739	-0.00160503	0.00178898	0.00159761	-0.00109283	-0.000258879	8.8745e-05	-0.000722379	-0.000369614	6.24458e-05	0.000306639	-0.000222906	-0.00013297	-1.95343e-05
MR0460_TraceCoords	G31	0.0258142	-0.0289937	-0.0238098	-0.00530447	-0.0109954	0.00110696	0.00409858	-0.0034225	-0.000440567	0.000703736	0.00128839	-0.0039284	0.000793815	0.0032109	-0.0012054	0.00119918	0.00057564	0.00171526	-0.000330981	-1.44904e-05	-0.000199812	0.000369787	0.000132489	-1.18225e-05
MR0465_TraceCoords	G31	0.0352887	0.0348919	0.000641915	0.00745019	-0.00267543	-0.00124442	-0.00581748	0.00249645	-0.00189098	-0.000568334	-0.00107857	0.001777	-0.00106634	0.00102785	0.00015566	5.56196e-05	3.68607e-05	0.000456341	-0.000701088	0.000190141	2.78134e-05	0.000112546	2.13733e-05	-1.44941e-05
MR0466_TraceCoords	G31	-0.0624806	-0.0103012	0.00647031	0.00727744	0.000354551	-0.00346872	-0.00617577	-0.00444229	-0.000386592	-0.00232043	0.000159305	0.00110075	0.000116884	-0.000466877	-2.45469e-05	0.000403336	-0.000454181	0.000231976	0.000424732	-1.88518e-06	3.85463e-05	0.000231976	-3.43619e-05	-1.11107e-05
MR0467_TraceCoords	G31	-0.164246	-0.00383614	-0.0428624	-0.0185091	0.020338	-0.0188276	-0.0102872	-0.00919459	7.25405e-05	0.00308289	-0.00190048	-0.00234744	-0.00429691	-0.00488594	0.000400072	-0.00675472	0.00226441	0.00316514	0.000993743	-0.000316402	0.000457878	-0.00036882	9.56903e-05	-1.55849e-05
MR0470_TraceCoords	G31	-0.0277287	0.0205346	0.00112439	-0.00142788	-0.00412767	-0.00807327	0.0023555	0.00159069	0.00485506	-0.00476424	-0.00178437	0.00231197	0.000413017	0.00072004	0.000705306	-6.79113e-05	0.000147705	-0.000313026	-0.000668154	-0.000290763	-0.000281536	-3.93141e-05	0.000362647	3.25897e-05
MR0472_TraceCoords	G31	0.0455439	0.019733	0.00558585	-0.00264528	-0.00115341	0.0016546	0.00291133	-0.00098587	-0.000598338	-0.00170803	0.000144056	-0.000735146	-9.84127e-05	-0.00118939	-0.00036272	-0.00145352	-0.000695716	0.000884585	-0.000257111	-0.00023957	-0.00033032	1.23763e-05	-0.000241202	4.1816e-06
MR0474_TraceCoords	G31	-0.050459	0.0139138	0.00908102	-0.00441528	-0.000734622	-0.00144502	0.00730893	-0.00195495	0.00144794	-0.00279938	0.00239434	-3.64748e-05	0.000901687	0.00041944	-0.000507469	9.26393e-05	-0.00031343	-0.000424244	0.000322197	-0.000223089	-0.00018964	0.000176104	-0.000301773	-1.20183e-05
MR0476_TraceCoords	G31	0.0839707	-0.00600889	-0.000402674	0.00442438	0.00293041	0.00372005	-0.00337689	-0.00289609	0.00203484	0.000511411	-0.00155257	0.000776698	-0.000384456	-0.000533873	0.00137124	0.000141245	0.000128801	-0.000474931	-0.000435559	0.000424009	-9.68585e-05	0.000174221	-4.61891e-06	-1.28229e-07
MR0479_TraceCoords	G31	-0.0398048	2.35867e-05	0.00195882	-0.000218028	-0.00358415	-0.00828356	0.000731267	-0.0025801	0.00590334	0.000392296	0.00141898	-0.00124902	0.000370264	7.06088e-05	-0.00076812	1.25299e-05	-7.71509e-05	8.6149e-05	-0.000427086	-0.000177785	0.00013361	-0.00045071	-0.000106124	-2.68711e-05
MR0480_TraceCoords	G31	-0.0341165	-0.0179099	0.0091169	-0.019367	-0.000276472	0.0107813	-0.00114911	0.0113029	-0.00868637	-0.000113524	0.00112435	-0.00309157	0.00282363	0.00133417	-5.36686e-06	-0.00218081	-0.000907579	-0.000398245	-0.000113271	-0.000257273	-0.0008519	-0.000247477	0.000308318	1.49636e-05
MR0483_TraceCoords	G31	-0.00896234	0.00389113	0.0121646	-8.64303e-05	-0.00193648	-0.00882483	0.00358321	0.000837655	-0.00231824	-0.000471187	-0.00136118	0.000833512	-0.00245076	-0.000199411	-0.000542647	0.000454177	-0.000532174	-8.48594e-05	-0.000568988	7.45863e-05	-1.61804e-05	-0.000157327	2.21303e-05	-5.01401e-06
MR0485_TraceCoords	G31	0.0704303	0.00867988	-0.00416415	-0.00410899	0.000463803	0.00010951	-0.00686345	-0.000494283	-0.000514582	-0.000250784	-0.000249704	0.00141163	0.000164421	-0.000913521	0.00176156	0.000144086	0.00080531	-0.000349503	0.000674448	0.000199483	5.60696e-05	-0.000133535	-7.39118e-06	-7.2892e-06
MR0489_TraceCoords	G31	0.0256205	0.018766	0.00419381	-0.00970185	-0.00252617	0.0015547	-0.00135571	-0.00104871	-0.000278728	0.000185309	-0.002726	0.000313437	0.00042574	-0.000688131	0.000112338	0.00021965	-0.000860198	0.000157481	-0.000324767	-2.94808e-05	0.000155172	-0.000187524	-1.71776e-05	9.31619e-06
MR0491_TraceCoords	G31	-0.0754437	-0.00211302	0.00587648	-0.00199969	0.00255489	0.00214901	-0.00851079	0.000538034	-0.00124621	-0.000680463	-0.00070163	0.0012514	-0.000419034	3.60879e-05	0.000112886	-0.000105945	-0.000765182	5.15326e-05	0.000606284	5.29971e-06	0.000368873	-0.000176108	4.63003e-05	1.4177e-05
MR0492_TraceCoords	G31	-0.0879788	0.022889	-0.00295943	-0.00556044	0.00323733	-0.00248711	-0.00385224	-0.00229561	-0.00647596	0.00358604	-0.00147025	-0.00164881	0.000647009	-0.000828052	-0.00107007	-0.000505799	0.00027267	1.67964e-05	0.000656681	-5.36133e-05	0.000106927	2.85491e-06	-3.46673e-05	2.29436e-05
MR0495_TraceCoords	G31	0.0710199	-0.00341752	-0.000167461	0.0163502	-1.32569e-05	0.000469993	-0.00367535	0.00406727	-0.00350792	-0.00270778	-0.00117205	-0.00143656	-0.00229599	-0.000521003	0.00113597	-0.00149676	0.000881901	0.000564039	0.000349513	-0.00111651	0.000122371	0.000318693	-8.97422e-05	-2.06726e-05
MR0501_TraceCoords	G31	0.0562259	0.00168861	-0.00581861	0.00116108	-0.00387305	0.0064919	-0.000865106	-0.000444187	-0.000605834	0.00222589	0.00127178	-0.000310479	0.00182357	-0.000323082	6.75528e-05	-0.000674782	0.000396925	-0.000262523	-0.000170525	-2.89813e-05	-4.63367e-05	-7.93401e-05	3.7948e-05	3.75925e-06
MR0503_TraceCoords	G31	-0.0825778	-0.0401758	-0.00115249	0.011747	0.00239046	0.0030845	-0.0035513	0.0023865	0.00311635	-0.00272671	-0.000717406	0.00192604	0.000656857	4.73634e-05	-4.40731e-05	0.000658391	-0.00113248	-0.000319465	-0.000452868	-0.000282554	-9.33309e-05	-0.000230211	0.000165676	1.76579e-05
MR0506_TraceCoords	G31	0.00574813	0.009427	-0.00229533	-0.00756643	-0.00533522	-0.00699981	-0.00266666	0.00202084	0.0014283	-0.000480458	-0.0016772	-0.00186172	-0.000981873	-6.86003e-05	-0.00110051	4.87573e-05	-0.000409942	-0.000337087	2.24168e-05	-7.9574e-05	0.00028956	-0.000102288	-8.94885e-06	1.64604e-05
MR0507_TraceCoords	G31	0.0121506	0.0203712	-0.0170324	0.00927304	-0.0109359	0.00208423	0.00645761	0.00225045	-0.00428508	0.00120889	-0.000442866	0.00281816	0.00171284	-0.000834397	-0.000275236	-0.000359461	0.000397182	-0.000298787	0.000412868	-0.000391862	-0.000157166	0.000209307	6.35395e-05	-5.20053e-06
MR0509_TraceCoords	G31	0.0348242	0.00835814	0.0152056	-0.00510873	0.000644231	0.00307973	0.00284415	0.00256573	-0.000466809	0.000379399	-0.000869967	-0.000228867	-0.000613074	-0.00207764	-0.000990629	-0.000216872	-0.000358702	0.000141316	-0.000451098	-0.000616718	4.5555e-05	-0.000409383	-0.000349591	-3.02168e-06
MR0510_TraceCoords	G31	0.0217292	-0.00097921	0.00956399	0.00177467	-0.0025447	-0.00442078	0.00313073	0.00123449	-0.00212893	-0.00134654	-0.000324982	-0.0010194	0.00123588	-0.00114102	-9.51004e-05	9.58356e-05	-0.000391969	0.000334469	-0.000439867	-0.000206873	0.000137112	4.43019e-05	-0.000114757	-4.34452e-06
MR0512_TraceCoords	G31	0.0426228	0.0220406	-0.0157039	0.0059242	-0.00694538	-0.00701687	-0.00268751	0.00359114	2.13696e-05	0.00293492	0.000281688	0.000829424	-0.000103098	0.000314644	-0.000212391	-0.000291058	-0.000653997	-1.42549e-05	-4.80707e-06	-0.000617665	0.000499439	-0.000890909	-0.000299528	-2.33519e-05
MR0514_TraceCoords	G31	-0.0196469	-0.0121524	0.0172452	-0.00247002	0.000131153	-0.00418852	0.000162445	-0.000440226	0.0012952	0.000989517	0.000433287	0.000518592	0.000457284	0.000647613	-2.21177e-05	-0.0005982	-0.000110914	-0.000147883	0.000324046	6.54092e-06	-0.000283121	3.26359e-05	7.142e-05	-1.29205e-05
MR0515_TraceCoords	G31	0.0109251	-0.00118124	0.0179159	0.00304057	-0.000488136	0.00172823	0.00127107	-0.00058475	-0.00155395	-5.25633e-06	0.000701822	-0.00138634	-0.00338758	-0.00102215	0.000838395	-0.000961863	-0.000132346	0.00026237	9.76695e-05	-0.000474754	-0.000217288	6.36404e-05	-0.000367762	1.66106e-05
MR0516A_TraceCoords	G31	0.0216335	-0.0240583	0.00135387	-0.00430596	-0.00446725	-0.00274584	0.00708613	-0.0042909	0.000513319	-0.00214931	-0.000156843	-4.96878e-05	0.00145802	0.000228307	-0.00042245	0.000549324	0.000558764	0.000662671	-0.000144316	9.92208e-05	8.77641e-05	0.000206277	0.000334395	-8.72144e-06
MR0523_TraceCoords	G31	0.0550332	0.0232667	-0.00831557	0.00848966	-0.00363962	-0.00354588	-0.00572029	0.000462182	-0.00126043	-5.32339e-05	-0.000676642	0.00162393	0.000533427	0.0016188	-0.000491654	-0.00115151	0.000427501	-0.000223856	-0.000342382	-0.000100556	4.62385e-05	-0.000175601	-2.40533e-05	-2.23601e-05
MR0524_TraceCoords	G31	0.0803824	0.0045106	-0.0047955	0.0136269	0.000564577	-0.000175202	-0.00458934	-0.0011727	0.00259005	0.00263174	-0.00193696	0.000878146	0.000717365	0.00170147	-0.000900403	-0.00136915	-3.18337e-05	-0.00117037	8.04353e-05	3.86776e-05	0.000142614	-0.000107789	-0.000236572	-1.0906e-05
MR0525_TraceCoords	G31	-0.0334246	0.0576726	0.0246381	0.0153206	0.00615157	-0.00755365	-0.00488175	-0.00106882	-0.000810436	0.00499629	-0.0042498	-0.00568547	-6.45143e-05	0.00424161	-0.0003158	0.0033505	0.000807949	0.00402762	-0.000551331	0.000707808	-0.00115174	-0.000240134	0.0013899	-6.03612e-06
MR0527_TraceCoords	G31	-0.0297407	-0.0338016	-0.00117309	0.00309252	-0.00489657	0.00269292	0.000822297	0.00215547	-0.00263433	-0.000197637	-0.00120371	-0.000724667	0.00267186	0.000310624	0.000470951	0.000481541	7.60942e-05	0.000121156	0.000321467	-0.000173739	0.000185578	8.92426e-05	0.000285882	-7.74432e-06
MR0528_TraceCoords	G31	0.0208828	0.00252442	0.0067938	0.0181732	-0.00410875	0.000306759	-0.00362328	5.6484e-05	0.00543674	0.00313469	0.00182957	-0.00382956	-0.000245026	0.000373123	-0.00147343	-0.000652178	-4.05136e-05	-0.000725776	-3.68792e-05	0.000124359	8.37871e-05	-0.000295638	-0.000145796	1.65909e-05
MR0529_TraceCoords	G31	-0.0610621	-0.00502423	0.0126005	0.00174321	0.00222925	-0.002602	-0.00569273	-0.00229936	0.00119911	0.00101262	0.00147858	0.000651378	-2.65039e-05	0.00025141	0.0021162	-0.000125038	-0.00049355	0.000575837	0.00030915	-0.000315621	0.000146459	-0.000116075	-0.000122743	9.71155e-06
MR0532_TraceCoords	G31	0.0634852	-0.00402818	0.00264812	-0.0051042	0.000562783	-0.00385307	0.00217989	0.00227676	-0.00105659	-0.000472248	-0.00331551	-0.000482768	-0.000352994	-0.000479295	0.00102899	0.00107687	-0.000612052	0.000149694	-8.30635e-05	-0.000315952	1.27507e-06	-0.00016252	4.94725e-05	-8.96419e-06
MR0533_TraceCoords	G31	0.0554369	0.000411137	0.0198318	-0.00171989	0.00370652	0.00274172	0.0117405	0.00445985	-0.000789006	-0.001695	-0.000689303	-0.000273654	-0.00298927	-0.00140678	-0.000356244	-0.00152513	-0.000721006	0.00128302	-9.68957e-05	-0.00011609	0.000225849	-0.00069836	3.42646e-05	-6.17818e-06
MR0534_TraceCoords	G31	-0.0359662	0.0188627	0.00562943	-0.0076509	-0.00189231	0.00238203	-0.00623993	-0.00335359	0.00443637	-0.00065629	1.86154e-05	-0.00105339	-0.000361762	0.000212076	-0.000145144	4.59936e-05	-1.84168e-05	0.000154553	0.000467653	-0.000246263	-2.85558e-05	7.12412e-05	0.000109531	2.34895e-07
MR0536_TraceCoords	G31	0.0131232	0.0238241	-0.00560285	0.00785882	-0.00684787	-0.00107531	-0.00234263	-0.00118439	0.00135381	0.000895219	0.0014093	0.000658149	-3.2403e-05	-0.00119508	-0.00101257	-0.000747992	-0.000223279	-6.43757e-05	-0.000166894	-0.000431354	-0.000209721	0.000220719	-0.000199406	4.71097e-06
MR0539_TraceCoords	G31	-0.0257441	-0.013123	-0.0068827	-0.00141711	-0.00700372	-0.00476838	0.00233574	0.00293159	-0.00154273	0.00134675	-0.000182454	-0.00184361	-0.00236366	0.000191331	0.000450476	-0.000303593	5.8408e-05	-0.00036021	-0.000365067	-0.000550752	0.000191286	-0.000315577	-9.07965e-05	1.55647e-05
MR0540_TraceCoords	G31	0.0117476	-0.0276491	-0.00278637	-0.00113194	-0.00613262	0.000576028	0.00222745	-0.00385274	0.000858501	0.000990544	-0.0024817	-0.000674424	0.00090464	0.000784098	-0.00102994	0.000926534	0.000524598	0.000391622	-9.34071e-05	0.000279824	8.44884e-06	0.000246621	0.000116545	8.04493e-06
MR0542_TraceCoords	G31	0.00533013	-0.0275449	-0.00927404	0.0057012	-0.008607	-0.00044284	0.00582502	-0.000557551	-0.00191704	0.000902677	-0.000247851	-0.0029037	0.0024194	-0.000148112	0.000470877	0.000134479	-0.000243178	6.19013e-05	0.000636129	-6.81949e-05	-0.000275653	0.000471757	0.000331535	8.58432e-06
MR0543_TraceCoords	G31	0.117764	0.00800769	-0.0125273	0.0101307	0.00753886	-0.00221727	-0.000999954	0.00545974	-0.000185141	-0.000160443	-0.00318393	0.00168949	-0.000908751	0.00228605	-0.000963949	-0.000601573	-8.91773e-05	-0.00024014	0.000933888	-0.000656842	7.48489e-05	-0.00019487	-0.00070526	-3.93097e-06
MR0545_TraceCoords	G31	-0.0152466	-0.000930118	0.0109111	0.0063223	-0.00329809	-0.00331659	0.00375215	0.00253247	0.00183959	-0.00272678	-0.00225251	0.000195058	-0.000776172	-5.831e-05	0.000187115	0.000656523	-0.000504179	8.49134e-05	-2.26715e-07	-0.000151854	-2.40387e-05	7.84564e-05	9.00728e-05	-1.50687e-05
MR0546_TraceCoords	G31	-0.0837374	-0.0195606	-0.0140834	0.00107064	-0.00281345	0.0140591	0.000319784	-0.00140834	-0.00191505	-0.000866008	0.00102281	-0.000676211	0.000949484	0.00120784	0.000574869	0.00030282	-0.00085085	0.000313679	-0.000280254	0.000607598	1.47239e-05	-3.2078e-06	0.000268042	1.91158e-06
MR0548_TraceCoords	G31	-0.0390505	0.00145446	0.0130928	0.0032073	-0.00131374	0.00571902	0.00164617	-0.0063682	-0.00118133	0.0024559	-0.000563134	0.000898076	-0.00160798	0.000714941	7.60347e-05	0.000207067	-0.000437352	0.000301735	0.000232445	-3.5336e-05	-2.3226e-05	0.000162665	-2.41117e-05	1.1863e-05
MR0550_TraceCoords	G31	-0.0795774	-0.0158194	-0.000457399	0.00266022	0.000513179	0.0034597	-0.00171978	-0.00052815	0.00363027	-0.00201732	0.00138892	0.000805108	0.00195583	0.000328042	4.14462e-05	0.000458997	-0.000186898	0.000120271	-0.000704805	-0.000565807	0.000312231	3.77998e-05	-8.7507e-05	1.85847e-05
MR0551_TraceCoords	G31	0.00602926	0.023556	-0.0073086	0.00578253	-0.00802258	0.00178245	0.00049838	0.00415836	-0.00149225	0.00066337	0.00083939	0.000626939	0.000992261	-0.000144834	0.000390637	0.000297455	-0.000264656	0.000151889	0.000120871	2.30941e-05	6.00202e-06	-2.54695e-05	-9.30956e-05	5.79568e-06
MR0554_TraceCoords	G31	0.0335644	-0.00606508	0.0155638	-0.00328674	0.000449524	0.0032496	0.000915627	0.000233897	-0.000414925	-0.00150194	-0.00346929	0.000297117	-0.00124888	-0.000175117	0.000548911	-0.000477238	-0.000222515	0.000298443	-0.00020083	-0.000312761	-0.000205086	-0.000375156	-0.000389665	1.73088e-06
MR0556_TraceCoords	G31	-0.0350018	0.00205766	-0.00585731	-0.00985697	-0.00637349	0.00992938	6.7712e-05	-0.00231987	0.000350052	0.00154112	-0.00115191	7.54697e-05	-0.000158023	0.000133528	-0.000934264	0.000725389	0.000250643	-0.000600514	-7.34541e-05	0.000149124	-1.16249e-05	0.00038776	-0.000222117	7.45153e-06
MR0557_TraceCoords	G31	0.0597151	0.0128802	0.000563608	0.00896685	-0.00175754	0.00496681	-0.000196649	0.00447376	0.00177116	0.00358716	-0.0009606	0.0013909	-0.00191937	-0.000582008	-7.4765e-05	-2.4982e-05	9.10246e-05	0.000293311	0.000397622	-0.000286745	0.000117478	6.10276e-06	-0.000147716	2.3559e-06
MR0558_TraceCoords	G31	0.0422106	0.0304019	-0.0141358	0.00339257	-0.00584558	-0.00421376	-0.00759059	0.0053203	3.80316e-05	-0.0022378	0.00191118	0.00164665	-7.6862e-05	0.000891239	0.000127133	0.000263482	0.000594334	0.000242205	0.000165253	0.000191852	5.48221e-05	0.000269153	0.000129635	2.31301e-05
MR0562_TraceCoords	G31	0.0296004	0.00234701	0.0150625	-0.00477182	0.000434576	0.00260314	-0.0042961	0.00391464	-0.000279633	-0.000952068	0.000249548	-0.00100421	-0.001072	-0.000745082	-0.000589711	-7.21685e-05	0.00053098	0.000150358	0.00022539	-7.74889e-05	7.2865e-05	-1.78315e-05	-0.000242693	-1.68211e-05
MR0565_TraceCoords	G31	-0.0451619	-0.0278625	-0.0126884	-0.00490535	-0.00521461	-0.0071464	-0.00696571	0.00516406	-0.0011063	-0.00642882	-0.00179727	-0.00273839	0.00255419	0.00010868	-0.000711722	-0.000684436	0.000302238	-0.000113385	-0.000510074	-6.41761e-05	0.000296912	-0.000455898	-0.000193462	-2.54782e-05
MR0566_TraceCoords	G31	0.0446064	0.0069803	-0.00281994	-0.000629836	-0.00453858	0.00459683	0.00187351	0.00338408	-0.00146367	-0.00180666	0.00130836	-7.01177e-05	-0.00134525	0.000428329	0.0014682	-0.00042096	-0.000161369	0.000267028	0.000114009	-0.000220348	-5.00145e-05	-3.71447e-05	0.000117217	1.71053e-05
MR0567_TraceCoords	G31	0.101662	-0.0015762	-0.00302213	0.00752823	0.00639154	0.00196484	-0.00745345	-0.000418232	0.00213831	-0.000730124	-0.00193154	-0.000299041	-0.00154084	0.00200144	1.04642e-05	-0.000627477	0.000548686	-0.0014245	-0.000422949	0.000820164	-0.000226488	-0.00102431	-0.000468381	-2.4453e-05
MR0571_TraceCoords	G31	0.0167051	-0.00313859	0.0161145	0.00924697	-0.000547567	-0.000283046	-0.00649737	-0.000464838	-1.40405e-05	-0.00203735	-5.69184e-05	-0.00096766	0.000155888	-0.00135479	-0.00159005	0.00043408	0.000578029	-0.000579508	0.000384739	0.00026679	-7.22414e-05	0.000192779	-3.86693e-05	1.03924e-05
MR0572_TraceCoords	G31	0.0735438	0.0116803	-0.00747589	0.00517704	-0.00106388	0.000531111	-0.00276887	-0.000325508	0.000954532	0.0021069	-0.00193651	0.00201665	0.000215856	-2.3247e-05	-0.000577876	-0.000530204	0.000547323	-0.000610741	0.000402254	0.000118582	7.74362e-05	4.83626e-05	-4.55228e-05	1.14483e-05
MR0573_TraceCoords	G31	-0.0189696	0.0108697	0.00719181	0.000730505	-0.00264111	-0.00402722	-0.00715894	-0.00732535	0.00397297	0.000209358	0.00129899	-0.0013125	-0.00333613	0.000714278	0.000362369	-0.000832933	-0.000439144	0.000174098	0.000199978	-0.00030132	-5.87808e-05	0.000225958	0.000155567	5.27606e-06
MR0575_TraceCoords	G31	0.0283166	-0.00360069	-0.00777638	0.0167893	-0.00812296	0.00184749	0.00117389	-0.00221043	-0.000694122	-0.000218597	0.00143026	0.000885701	0.000935163	-0.000839296	-0.000556163	-9.35193e-05	0.000335223	-0.000388225	-8.17547e-05	-0.000171824	0.000210542	8.76872e-05	0.000310325	-2.80503e-06
MR0576_TraceCoords	G31	-0.0408731	0.00996481	0.0132092	-0.00212555	-0.000628798	0.00841191	-0.000730385	0.00466483	-0.000898526	0.00116953	0.000162323	-0.00134471	0.000301359	-0.00034878	-0.000474974	0.00010466	-0.000323778	-0.000319311	0.000177159	-2.44775e-05	-0.000215623	0.000277753	-9.61519e-05	1.0209e-05
MR0577_TraceCoords	G31	-0.0936935	-0.0164478	-0.00443972	0.000220561	0.00266501	0.00180187	-0.00109884	0.00026714	-0.00324111	0.00370793	0.000673565	-0.000167198	0.000992997	0.00040396	0.000308192	-0.000645043	-0.000458066	-0.000473395	0.000494775	0.000264402	2.53898e-05	-2.94649e-05	-0.000127465	2.26456e-06
MR0578_TraceCoords	G31	-0.0201153	-0.00347956	-0.00898021	-0.00119115	-0.00831135	-0.00405819	0.00357769	0.00411066	0.00136961	-0.000124759	-0.00116871	-0.00133326	0.000324684	-0.000529692	0.000480579	0.00081396	-0.000113993	-0.000208435	0.000260049	-0.000182519	5.4807e-05	-0.000113681	-7.76587e-05	6.90978e-06
MR0579_TraceCoords	G31	-0.000517746	0.0167055	0.00688422	0.00322287	-0.00359112	0.00349775	-0.00558746	-0.00225966	-0.00178227	-0.000725014	0.000868257	-0.00018788	0.00148041	-0.000887902	0.0011051	-0.000203253	3.66016e-06	0.000143837	0.00024893	-8.83164e-05	0.000192697	-0.000306608	-0.000132122	3.4123e-06
MR0580_TraceCoords	G31	0.0390769	-0.00486686	-0.0208935	-0.00238679	-0.0102257	0.00869787	0.00181331	0.00735945	-0.000685325	0.00141005	-0.000672576	0.000823141	0.00142209	0.00160082	0.000777177	0.000252258	0.000449049	0.000785721	0.000439768	-0.000211589	-9.66933e-06	-0.000225001	0.000124783	2.12714e-05
MR0581_TraceCoords	G31	-0.0858693	0.021087	0.00428237	-1.00258e-05	0.0035832	-0.000155035	0.00172244	-0.00331679	0.00146996	5.90997e-05	0.00101876	0.000118763	-0.000852778	0.000201965	-0.00026876	0.000949001	-5.60271e-05	-0.000325233	0.000183281	-0.000227173	-0.000222677	-6.51749e-05	-5.97857e-05	-1.54947e-05
MR0582_TraceCoords	G31	0.0280626	-0.00769241	0.00424906	-0.00107168	-0.00299679	0.00150688	-0.00290661	-0.00371613	-0.00726636	0.00242535	0.00245134	-0.000156242	0.00108346	-0.000967948	0.000951534	0.000186065	0.000304617	-0.000549911	-7.59825e-05	-5.47661e-05	0.000196773	-0.000207349	0.000120216	-8.3613e-06
MR0583_TraceCoords	G31	-0.0445162	0.00102019	0.0151836	-0.0136175	0.0015593	-0.00484399	0.0106999	0.00525868	-0.000340214	0.00357617	0.00303385	0.00242918	0.00302621	-0.000280779	0.000252007	-0.000471812	0.00148695	-0.000684873	0.000432896	0.00019525	-0.000136772	-8.5495e-05	-0.000113951	-1.63415e-05
MR0585_TraceCoords	G31	-0.0269814	-0.0259124	0.0129585	0.00354439	-0.000361493	-0.0062384	-0.00210298	0.000849458	-0.00163289	-0.00122318	-0.0015926	0.0020891	0.00175524	0.000446251	-6.91447e-05	-0.000244774	0.000189398	-0.000225087	0.000207246	-0.000344477	-3.10348e-05	0.000193985	0.000104983	-2.43377e-05
MR0588_TraceCoords	G31	0.00739378	0.0443317	-0.00210516	0.00379091	-0.00452349	0.00481961	-0.00493819	0.0059664	0.000905083	-0.00226449	0.00129041	0.000988144	-0.000633279	0.000870791	-0.000704997	-0.000533558	0.000430303	0.000361409	-0.000294391	0.000121125	6.1761e-05	0.000159731	0.000105275	-9.58698e-06
MR0590_TraceCoords	G31	-0.064876	0.00911794	-0.00258101	-0.00978145	-0.00227774	0.0152614	0.000411635	0.00515805	0.00395553	-0.00446693	-0.000718979	-0.00135693	0.000329458	0.000213752	-0.00266769	-0.00042804	-0.000250538	-0.001378	-0.000944512	-0.000279509	0.000239344	0.000194065	0.000439928	6.60793e-06
MR0593_TraceCoords	G31	-0.0467958	0.00875115	-0.00502746	-0.0119899	-0.00426581	0.00324678	-0.00102505	-0.00345467	0.00117426	-0.000160763	-0.00147425	-0.000100684	-0.00140172	-6.64963e-05	0.000444901	-0.000355131	0.000393545	-0.000403537	0.000208439	0.000149075	0.000347238	0.000134959	0.00018915	7.50117e-06
MR0594_TraceCoords	G31	0.0661943	0.0180714	0.004225	0.00622532	0.00195014	-0.00365374	-0.00811945	0.000919859	0.000867859	-0.00205839	0.00150898	-0.00082963	-0.00147293	-0.000113499	2.93596e-05	-0.000452919	0.000130774	-4.24838e-05	-0.00017234	0.000501162	-2.34726e-05	0.000375895	2.76341e-05	1.90635e-05
MR0602_TraceCoords	G31	0.0103179	0.0214896	0.00830747	0.0157714	-0.00365337	0.00165393	-0.00311365	0.000150884	-0.000951541	-0.00299802	0.000264435	-0.00048	-0.000527558	0.000570144	0.00113135	-0.000154378	-0.000608094	0.000363974	-0.000555719	0.000194907	-4.81854e-05	0.000309636	5.22407e-05	4.18407e-06
MR0603_TraceCoords	G31	0.018165	0.0427867	-0.00415855	0.00892821	-0.00499672	-0.00377571	0.000167704	0.00275424	-0.00252273	0.00208424	0.000778448	0.000214274	0.000700917	0.00104485	0.00122027	0.000189223	-2.71239e-05	0.000705307	-3.8932e-05	0.000285481	-0.00037988	7.05036e-05	0.000143387	-4.62384e-06
MR0608_TraceCoords	G31	-0.107784	0.00281182	-0.00713338	0.00243478	0.0054872	-0.00799921	-0.0021423	-0.00323324	0.00120351	0.00128306	-0.000550251	-0.000115846	-0.000196024	-0.00126814	-0.000625883	-6.03704e-05	0.000772074	0.000201745	0.000235481	-0.000174277	0.000220771	-3.21388e-05	-5.67084e-05	-4.51689e-06
MR0609_TraceCoords	G31	-0.043903	-0.0125983	0.00433106	-0.00707277	-0.00170622	-0.0049131	-0.00196025	0.000990836	0.00345816	0.00322531	0.00148641	-0.000235442	-9.9813e-05	0.000127902	-0.000458287	-0.00041865	0.000235611	-0.00023515	8.98622e-06	7.48849e-05	-6.4239e-05	-0.00015145	9.15244e-06	-9.12805e-06
MR0610_TraceCoords	G31	0.00436113	0.0286306	0.00254861	0.0106343	-0.00524817	0.00218575	0.000911391	-0.00095319	0.000325614	0.000237436	-0.000967074	0.00143258	-0.00117934	-9.29544e-05	-0.00188563	0.000426749	0.000123928	2.92774e-05	-0.000116262	-5.3987e-05	-4.74603e-05	-0.000145311	0.000122554	6.17994e-06
MR0612_TraceCoords	G31	0.0447789	0.0124862	-0.00427383	-0.0277448	-0.00236724	0.00492446	0.0111844	0.00822307	-0.00454917	0.00375289	4.97226e-05	-0.00153081	-0.000860327	-1.27563e-05	0.000454104	0.000633216	-0.00158668	0.000707745	-0.000133364	-0.000289757	8.32636e-05	8.29597e-05	-8.78834e-05	-2.63888e-05
MR0613_TraceCoords	G31	0.186423	0.0145317	-0.0267682	-0.00318635	0.0309799	0.000753185	0.00609624	0.00258826	-0.00017223	-0.00167861	0.00270051	0.00668296	0.00215764	0.00141819	-0.00140405	-0.000646984	-0.00137809	0.00120177	-0.000177188	0.000414719	-0.000478293	1.58533e-05	-6.99991e-05	-1.39996e-05
MR0615_TraceCoords	G31	-0.0432894	-0.000191977	0.00614048	-0.00375093	-0.00161034	-0.0101442	0.00321585	0.00166997	-0.00117993	0.00298124	0.000434471	-0.000555479	6.41957e-05	-0.000484066	-0.000541592	-3.12272e-05	-4.92146e-05	-0.000298408	-4.47066e-05	5.42117e-05	-0.000280483	-7.73045e-05	0.000111452	8.35612e-06
MR0620_TraceCoords	G31	-0.000847732	-0.00834897	0.00844041	0.00565088	-0.00366074	0.000138243	-0.00239348	0.000128545	-0.00110425	-0.00301641	-0.0013545	0.000215827	-0.00012626	-0.000784568	0.000571498	0.000131532	-0.000322563	-5.25765e-05	2.64643e-05	-0.00010276	0.000160115	-5.78361e-06	-8.23929e-05	-2.73672e-05
MR0621_TraceCoords	G31	-0.0980634	-0.0255941	-0.00363101	0.00263989	0.00455487	0.00171415	-0.00499902	0.00270996	-0.000312594	0.00195053	0.0011256	0.00200944	-0.00226578	-1.29556e-05	-0.00251958	-0.000328451	-0.000779227	-0.000542362	0.000484164	0.000563906	-7.78048e-05	4.06491e-05	0.000174724	2.32958e-06
MR0626_TraceCoords	G31	0.0327613	0.00443862	0.0139415	0.00497162	-0.00157217	0.012118	0.00730744	-0.00138957	0.0048131	2.20412e-06	0.00117419	9.50697e-05	-0.00287034	-0.000533616	0.000747974	-0.000729732	-2.94843e-05	0.000361132	0.000105721	0.000472729	0.000261703	-0.000193996	2.8606e-05	-6.17843e-06
MR0630_TraceCoords	G31	0.0814463	0.0191289	-0.00412674	0.00747372	0.00155254	-0.00189303	-0.00190274	4.76218e-05	0.0035895	-0.00129242	0.00126178	0.000666714	-0.000884899	0.000666377	-0.0011126	-0.00129518	-0.000681072	-0.000136629	-0.000199171	0.000489425	-6.54192e-06	-0.000286193	0.000115672	-4.3001e-06
MR0631_TraceCoords	G31	-0.0521119	-0.0190694	0.00167281	0.00204622	-0.00218481	0.000636735	-0.00441434	-0.00442343	0.00249988	0.000626507	-0.000376747	0.00113616	-0.00103164	2.6416e-05	0.000556403	0.000392798	-0.000116553	-5.71454e-05	0.000188824	-0.000189658	0.000215392	-0.000152144	-3.46238e-05	2.07378e-05
MR0635_TraceCoords	G31	-0.0177675	-0.0350302	0.0164374	0.00808485	0.000418959	-0.00275985	-0.00100329	0.00140935	0.000777319	-0.00166539	-0.000989289	0.00293749	0.00186368	9.8523e-06	-0.00158055	0.000368172	0.00025725	-0.000151673	0.000220947	9.44805e-05	7.07204e-06	-9.33178e-05	-1.43662e-05	-9.53426e-06
MR0637_TraceCoords	G31	-0.0654175	0.0261384	0.0260259	0.0177659	0.00574632	0.00612501	0.00888436	0.00243129	-0.00308079	-0.000947833	0.00248947	-0.00264378	0.00133383	-0.000327653	0.0034494	0.00105025	0.000142379	0.000737056	0.000146403	-0.000176996	0.000147209	0.000675389	-0.000105675	9.84945e-06
MR0638_TraceCoords	G31	-0.0656395	0.013248	-0.0187145	0.00421964	-0.00690139	0.00614612	0.00118697	0.0031585	-0.000860427	0.00541165	-0.00155923	0.000847133	-0.000997031	-0.00139565	-0.0019547	0.000155629	0.000579835	-0.000858407	-0.00066861	-0.000134968	-0.000160823	0.000239278	0.000201555	2.78654e-05
MR0642_TraceCoords	G31	-0.047038	0.0144632	0.0224198	-0.00547346	0.00363892	0.00440549	-0.00108653	0.00457481	-0.00160432	0.00208157	-0.00027672	-0.000807127	-0.00178374	0.000466161	-0.00109633	3.99691e-05	0.000270227	0.000230349	0.000216493	-9.87664e-05	-5.60942e-05	-1.18935e-05	0.0001232	1.42292e-05
MR0646_TraceCoords	G31	-0.0591194	0.023386	0.00587106	0.00130491	-7.50286e-05	-0.00594438	0.00172252	0.000820456	0.00244596	-0.00231959	-0.00111357	-0.00106156	-0.00113801	0.00129343	0.00156957	0.000428328	-0.000333276	0.000187101	-0.000147589	-0.000128604	-2.81684e-05	-0.000141522	0.000100199	2.19931e-05
MR0647_TraceCoords	G31	-0.1934	0.00940203	-0.0243308	0.0025631	0.0320278	-0.00499289	0.0117254	0.00213817	-0.00254216	0.00128471	-0.00321934	-0.00142078	-0.00126499	-0.00336131	0.000564311	-0.00173127	0.00209999	-0.00110729	-3.29733e-05	0.00145847	0.00026346	-0.000611485	0.000521997	-2.8441e-05
MR0648_TraceCoords	G31	0.0186005	-0.0177345	0.0134977	0.00283937	-0.000591453	-0.0106988	0.00162226	-0.000190185	-0.000913472	-0.00305629	-0.00234448	8.95163e-05	0.00117365	8.03203e-05	-0.00108948	-0.000264105	0.000403033	-7.47819e-05	-0.000146097	-0.000436279	-1.61356e-05	0.000173962	9.5582e-06	1.3977e-05
MR0649_TraceCoords	G31	-0.00648928	0.0116821	0.0109857	0.0056029	-0.00284347	0.00456368	-0.00479574	-0.00143424	0.00155364	0.00100186	0.00193036	-0.001061	0.00114695	-0.000842755	-0.000992706	0.000273713	4.1303e-05	-0.000480364	5.12682e-05	-0.000117036	0.00034482	-0.000309016	6.01809e-07	2.99107e-06
MR0653_TraceCoords	G31	0.00951819	0.0207933	-0.00835698	0.013616	-0.0078523	-0.00682057	-0.00258327	-0.000454428	-0.001341	0.00237301	-0.00190656	0.000367118	-0.000403146	0.000756417	-0.000683441	9.30559e-06	-0.000316469	-0.000513296	-0.000159825	-0.000118671	-5.69991e-05	-0.000166706	-7.4388e-05	-8.78926e-07
MR0654_TraceCoords	G31	-0.0394537	0.0220385	-0.00567823	0.0163185	-0.00632312	-0.00390888	0.0023479	0.000338293	-0.00140375	0.00212102	0.000784276	-0.000278091	-0.00160406	0.000169351	0.00153879	0.00142561	-0.000256488	-0.000893129	-0.000241196	0.000866926	-0.000184591	-6.40148e-05	-0.000205735	4.05402e-06
MR0655_TraceCoords	G31	0.0619294	0.0208307	-0.00548207	0.00738087	-0.00243988	-0.00337295	-4.89034e-05	-0.00114072	-0.00262533	-0.000951354	-0.00200733	7.27889e-05	0.00215016	0.00113733	-0.000246322	-0.00040019	-0.000517817	0.000293446	0.000254843	6.57847e-05	-0.000611152	0.000231169	0.000338372	2.32903e-06
MR0656_TraceCoords	G31	0.0086434	0.00452931	-0.000483156	-0.0115414	-0.00518301	-0.00483804	0.00593425	-0.000283585	0.00112148	-0.00130814	0.00203655	-0.000398173	0.000101531	-0.000530423	-0.000474164	0.000359704	-0.00102392	2.59603e-05	0.000278735	-0.000118528	-6.51492e-05	-6.63656e-05	0.00010836	-4.60304e-06
MR0658_TraceCoords	G31	-0.0226715	-0.0149406	-0.000762255	-0.00233552	-0.00584514	0.00686284	0.000111979	-0.00207845	-0.00132235	6.5224e-06	-0.00136404	0.00063169	-0.000562181	-1.66328e-05	8.35038e-05	-4.07043e-05	-0.000107113	-0.00026789	-4.2366e-05	0.000181489	4.99714e-07	-8.37289e-05	-0.000185824	9.64179e-06
MR0660_TraceCoords	G31	0.172661	-0.000623507	-0.0287228	-0.00333166	0.0248716	-0.00681575	-0.00215263	0.00115321	0.00153322	0.00160598	-0.00177772	0.00258742	-0.000718809	0.00437396	-0.000529555	0.00237273	-0.00131339	-0.00190296	0.000293495	-0.000631487	-0.000103165	-0.000245043	-0.000467779	-4.17738e-06
MR0661_TraceCoords	G31	0.0529279	0.0111988	-0.00206544	0.0216092	-0.00373531	-0.00121877	0.000258314	0.0033683	-0.0024435	-0.00244316	0.000693589	0.00101606	-0.00250884	0.000529953	-0.00110157	-0.000920348	0.000211206	-0.000268311	-0.000236694	-6.23031e-05	-0.000175463	0.000311548	6.79035e-05	5.87871e-06
MR0667_TraceCoords	G31	0.0864384	0.0111058	-0.0130257	0.000854849	0.000482444	-0.000953472	-0.00544124	0.00525579	0.0028362	0.000818656	0.000562244	0.000602983	-0.00111092	0.000887335	0.0010823	-0.000195414	0.000216934	-0.000172539	0.000779437	-0.000421184	-8.36252e-05	0.000283097	-7.35344e-05	-1.09391e-06
MR0668_TraceCoords	G31	-0.00143426	-0.00864087	0.0106036	0.0032225	-0.00344099	-0.00104683	0.00469066	0.00254108	-2.05757e-05	0.00163108	-0.00330268	0.000466868	-0.000240243	0.000204814	-0.000126941	0.000295845	-0.000332181	0.000141428	-1.73349e-05	-0.000235709	0.000259656	-9.24716e-05	-0.000100853	2.20856e-06
MR0670_TraceCoords	G31	-0.0413958	0.019376	0.0118502	-0.0029616	-0.000137437	0.00298845	-0.00353224	-0.00463818	0.00140929	-0.000825742	-0.00231859	-0.000357518	-0.0024533	0.00131677	-0.000687789	-0.000444901	-0.000838714	0.000125281	3.90636e-06	-9.46902e-05	-0.000234314	2.03443e-05	2.42293e-05	-3.31327e-06
MR0673_TraceCoords	G31	-0.0801483	-0.00206455	-0.00157808	-0.00357055	-0.000182792	0.0140735	0.00125773	0.00110172	-8.48533e-05	-0.00420628	-0.00235153	0.000220994	0.00134215	0.000806379	-0.00196123	0.000147389	-0.00134139	-0.00106175	-0.000386143	-1.02643e-05	0.000467768	1.88035e-05	0.000179617	-2.75469e-05
MR0675_TraceCoords	G31	0.0213272	0.0124483	0.00993066	-0.00720403	-0.00170566	0.00133374	0.00179388	-0.00260799	-0.00375465	0.00121162	-0.000266968	-0.000391371	0.000157178	-0.000504554	-3.11808e-05	-0.000202547	-0.000559771	0.000150363	-0.000128891	-7.67212e-05	-0.000229505	0.000149375	-7.11542e-05	3.5725e-07
MR0676_TraceCoords	G31	-0.11079	-0.00542173	-0.00493853	0.00319623	0.00610101	0.00486902	-0.00244612	0.0093116	0.00277931	-0.00134604	0.00363416	-0.00141647	-0.0010006	-0.000969294	-0.000812453	0.000301945	-0.000526059	-0.0009612	-0.000948024	0.000191984	-0.000176938	8.16653e-05	4.31223e-05	-1.52299e-05
MR0677_TraceCoords	G31	0.0721206	-0.000835541	0.00700215	0.0143671	0.00238259	-6.45172e-05	-0.00442738	0.0022123	-0.00207059	-0.000360435	-0.00206318	-0.00152224	-0.0010181	0.000879584	0.000302069	-0.000517966	2.68831e-05	-0.000333574	-1.28217e-05	-4.0495e-05	0.000253387	3.50577e-05	-0.000109236	2.93393e-06
MR0679_TraceCoords	G31	-0.120947	0.00440198	-0.00512863	-0.000349123	0.00819202	0.00360557	0.00771038	0.00426541	-0.00228562	-0.00146573	0.00326109	-0.00229536	0.00178845	-0.000309228	-0.00201076	0.000258377	0.000867937	-0.00107741	-0.000732836	0.000149048	-0.000370291	0.000405405	-0.000201704	1.14257e-05
MR0682_TraceCoords	G31	-0.122431	0.0477053	-0.0158867	-0.00467206	0.00947895	0.000380777	0.000739449	-0.00295579	0.00565184	0.00280478	-0.000843743	-0.00333941	0.000405032	0.000416982	-0.000985845	0.000714964	0.00071849	0.0002222	6.38904e-05	-0.000557247	-0.000375455	-0.000610765	0.000204581	2.40267e-06
MR0683_TraceCoords	G31	0.0349474	0.0115151	0.000612136	0.00885541	-0.00469052	0.00439729	-0.00125991	-0.00249263	0.00277058	-0.00032153	0.00177212	0.000975403	-0.000103576	-0.000474765	-0.000739137	-0.000529006	0.000498993	-0.000261976	3.46878e-05	0.000284004	1.36085e-05	0.000147745	4.01048e-05	-6.94409e-06
MR0684_TraceCoords	G31	-0.0576957	-0.00620397	-0.0176814	-0.0164814	-0.00621724	0.00351724	0.00132634	0.00173102	-0.00143785	0.000613909	0.000172576	-0.00228648	-7.74785e-05	0.000841085	-0.000361555	-0.00035277	9.78967e-05	-0.000605602	-0.000414349	0.000507296	-0.000162286	-0.000152064	0.00017693	2.65749e-06
MR0686_TraceCoords	G31	0.00974694	0.0201247	0.00838382	-0.00777668	-0.00180478	-0.00638134	0.000482742	-0.00166232	-0.000399369	0.000970623	-2.11039e-05	-0.000230509	0.0007871	-0.000713761	-3.27781e-05	0.000482659	-0.000392879	0.000270439	2.56042e-05	-0.000175482	0.000104917	2.73959e-05	0.000203958	3.03463e-05
MR0688_TraceCoords	G31	0.0251063	0.0142287	0.00444994	0.00546209	-0.0040911	0.000142645	0.00124089	-0.0023653	0.00542246	-0.00139193	0.000389093	-0.00114882	-0.00113331	8.31528e-05	-0.000158878	-0.000570462	-0.00112992	0.000135435	-0.000141457	-5.29032e-05	-0.000332739	-0.000134031	-4.38389e-05	-1.43515e-05
MR0689_TraceCoords	G31	-0.0249053	-0.00378722	0.0155284	0.00441881	-0.000485121	-0.00401916	-0.00283879	-0.00635077	0.00299972	-0.0026262	-0.00145919	0.000911953	-0.00176678	-0.000287646	4.10726e-05	0.000470866	0.000189343	-9.17395e-05	1.62738e-05	0.000125307	-0.000181958	-7.23891e-05	0.000100237	-7.57748e-06
MR0695_TraceCoords	G31	-0.103265	0.0242395	0.0062073	0.000627902	0.00889252	-0.00333641	-0.00666846	4.86559e-05	0.00435551	-0.00247017	0.000515969	-0.00151208	-0.000480926	-0.000402052	-0.00067054	0.000803371	0.000544515	0.000584662	-1.53153e-05	-6.4786e-05	0.000600727	0.000218705	0.000195041	2.02441e-05
MR0701_TraceCoords	G31	-0.0466618	0.0304821	0.00504468	0.00764772	-0.00219275	0.00348488	0.000897046	0.00242792	-0.00102228	0.000740761	0.00301797	-0.00169808	0.000115205	0.000155196	0.00123119	0.000864318	0.000416105	6.00314e-05	-0.000299289	-0.000276012	-0.000191637	-6.89131e-05	2.28209e-05	-2.03902e-05
MR0702_TraceCoords	G31	-0.0189663	-0.040392	0.00640109	0.000123322	-0.00210864	0.00293647	-0.00282592	6.95221e-05	0.00262468	-0.000892632	0.000336244	0.000339175	0.00101377	0.000276863	0.000138914	0.000108556	0.000871454	0.000505672	0.000491924	0.000243889	0.000325846	0.000144027	0.000285886	5.45588e-06
MR0706_TraceCoords	G31	0.0386491	0.021717	-0.00508152	0.00242083	-0.00481076	0.00013106	-0.0025842	-0.00343623	0.00229834	0.00233849	0.00223171	0.000242256	0.000521171	-6.17981e-05	0.000435517	-0.000947264	-0.00021735	0.000317667	-6.80565e-05	-0.000276271	7.97707e-05	0.00022739	0.000374286	-4.21744e-06
MR0709_TraceCoords	G31	0.0187359	-0.0110005	0.0175008	-0.00115736	0.000401689	-0.00527953	0.00287115	-0.00359901	0.00186789	0.000511155	0.00044838	-0.000196008	0.00215875	-0.000309728	0.000365651	-0.000593786	-5.36968e-05	-0.000116387	-0.000203775	2.73617e-05	1.26551e-05	0.000123265	0.000135466	5.65881e-06
MR0711_TraceCoords	G31	-0.0608878	-0.00145669	-0.0121388	-0.00761079	-0.00596161	0.0122726	0.00106619	-0.00310976	0.00379756	0.00131719	-0.000918134	-0.00108546	8.07668e-06	0.00173776	0.000821538	0.000645548	-4.40323e-05	0.000317688	-0.00036876	0.000205157	0.000353612	0.000415761	-9.63718e-05	-8.23811e-06
MR0712_TraceCoords	G31	0.0913654	0.00191567	-0.0193197	0.0200588	-0.00153968	-0.00569247	0.00385213	0.00275788	-0.00588796	0.00233351	-0.00088856	0.000562813	-0.00092471	0.00313198	0.00318223	-0.0012226	0.000125809	0.000269353	9.14749e-05	-0.000727333	0.000232547	-3.7253e-05	0.000192483	1.87892e-06
MR0713_TraceCoords	G31	-0.00488806	-0.0140433	0.00412699	0.0020914	-0.00438092	0.00171231	-0.00487713	-0.00626077	0.000806846	-0.00228407	0.000153919	-0.000914705	0.0023434	-0.00033818	0.00149705	-0.000191035	-0.000432774	-0.000211417	-0.000121669	-3.80677e-07	-0.000208637	-0.000341835	7.72831e-05	-3.53138e-06
MR0714_TraceCoords	G31	-0.0188163	0.00725852	0.00531924	0.00479032	-0.00483332	0.00297046	0.000558503	-0.0053231	0.000760524	-0.000745256	0.00171949	-0.000994879	0.000131786	0.000330373	9.87466e-05	-0.000102676	-0.000343912	0.000134964	-6.64816e-05	9.51756e-05	-0.000155413	-0.000236593	-0.000127333	-7.50875e-07
MR0715_TraceCoords	G31	-0.0133653	-0.0213493	0.00505674	2.26487e-05	-0.00396646	0.000520932	-0.00125955	-0.00481204	0.000718144	-0.00203023	0.00125815	0.000493054	-0.000752274	0.000677724	-0.000842375	-0.000338952	-0.000498302	0.000170963	6.16023e-05	0.000245016	-0.000221957	-8.16571e-05	3.63922e-05	-1.00063e-05
MR0716_TraceCoords	G31	0.111367	-0.00257643	-0.00712429	-0.00709803	0.00808181	0.0026438	0.000936239	-0.00443995	0.00133256	0.000976934	0.000806788	-0.000145114	-6.9642e-05	7.45674e-05	0.000293993	0.000930226	0.000344585	0.000382141	-0.00100334	0.000959225	4.01946e-05	0.0002763	-0.000322591	-1.07992e-05
MR0720_TraceCoords	G31	-0.158788	-0.0133624	0.00246895	0.00883258	0.0237117	-0.0010944	0.00240359	0.00467406	0.00160235	0.000657679	-0.000131374	0.00412218	-0.00217695	0.000239889	-0.000126827	0.00100885	0.000926525	-0.000637991	-0.000567785	0.000524577	-0.000483977	0.000362325	0.000400276	1.12673e-05
MR0721_TraceCoords	G31	0.0632159	0.017929	-2.34127e-05	0.00130708	0.000281951	-0.000131693	-0.00898475	0.00239058	-0.000431486	0.000337305	0.00061158	-0.00153798	-0.000116482	0.00113465	0.00205639	-0.000698068	-0.000241425	6.47879e-05	-0.000348863	-7.0056e-05	-0.000442953	0.000178611	0.000462536	-1.91545e-06
MR0726A_TraceCoords	G31	-0.0280743	0.0207991	-0.00175425	0.00414965	-0.00534338	-0.000479038	-0.00415671	0.000612637	-0.00168035	0.000886655	-0.00101315	0.00012706	-0.00109476	-0.000695909	-0.00046491	0.000903613	2.82735e-05	-9.90264e-05	-8.56783e-05	-3.87655e-05	-0.000326315	0.00025014	0.000126057	3.59195e-06
MR0727_TraceCoords	G31	0.00692346	-0.0257963	0.00824683	-0.00297343	-0.00253985	0.0041498	-0.00339723	0.000815269	0.000688164	-0.00014789	0.000757057	-0.000707145	0.00178713	-0.000532163	-0.000949082	0.00042027	0.000455785	-0.000141332	0.000196892	3.34296e-05	-5.99864e-05	-0.000148974	-1.47412e-05	4.28616e-07
MR0728_TraceCoords	G31	-0.12713	0.0354585	-0.014845	-0.00562215	0.00989935	-0.00282936	0.00897102	0.000522111	0.000216768	-0.00338364	-0.000441681	-0.00226885	-0.00210152	0.0002513	0.00170127	0.000645333	0.000433702	-0.00126484	0.000444905	0.000274279	-8.7167e-05	0.000370191	-9.50498e-05	1.86498e-06
MR0731_TraceCoords	G31	-0.0123076	-0.0131039	0.00296776	-0.00547506	-0.00441179	-0.00423482	0.00188816	0.0014469	3.07145e-05	0.000136309	-0.00316798	-7.10121e-05	0.00169506	0.000159419	0.00080375	-0.00020426	0.000263361	-0.000483737	-0.000441368	-0.000166346	2.79967e-05	2.22491e-05	-8.24599e-05	1.83028e-05
MR0732_TraceCoords	G31	0.0496169	-0.0139765	0.00706774	-0.00366505	0.000454727	-0.00853714	0.000613117	-5.74962e-05	0.000914726	3.4596e-05	-0.00161566	0.00104411	-0.000338666	0.000757545	1.84795e-06	0.000725204	0.000234594	-0.000363297	-0.000358775	-0.000142574	0.000125859	-0.000214782	-8.42678e-05	-1.28288e-05
MR0733_TraceCoords	G31	-0.0308747	0.0280709	-0.000755764	0.00589523	-0.00469689	-0.00114265	-0.0013535	-0.00209452	0.00348663	0.000599293	0.00278401	-0.000384407	-0.000999745	-0.000654871	0.000535259	0.000502485	-0.000235917	8.69928e-05	6.09411e-05	-3.56751e-05	1.51313e-05	-0.000160568	-0.000202258	-1.05926e-05
MR0738_TraceCoords	G31	0.130123	0.00438019	-0.0144852	-0.00078717	0.0112972	0.00388067	-0.000397542	-0.00184145	-0.00338156	0.000990371	0.0029007	0.00337258	0.000970098	0.00165807	-0.00106309	-0.00115806	0.00147673	-0.000103506	-0.00117642	-0.000576256	-0.000306203	5.87842e-05	0.000429555	-9.61434e-06
MR0743_TraceCoords	G31	0.0597423	0.0109369	0.00792205	0.0022332	0.000823204	0.00215212	0.00217013	-0.0011443	0.0014419	0.00035319	-0.00174683	0.000221368	-0.00109301	-0.00081401	-0.000728359	-0.00101968	-0.000574718	0.000703612	7.1247e-05	-0.000257266	-0.000374675	6.93238e-05	-0.000286062	-4.66933e-06
MR0745_TraceCoords	G31	-0.0437523	0.00928282	0.00901827	0.00432417	-0.00246288	0.00326966	0.00645892	0.00605246	0.000364295	-0.000854266	-0.002784	-0.000318817	-0.000344448	-0.000375485	-0.00117167	0.0005171	-0.000493217	-0.000467386	-0.000606707	-0.000181468	-6.01638e-05	-5.37768e-06	7.28025e-05	2.58798e-09
MR0747_TraceCoords	G31	0.113294	-0.0169619	-0.0155625	0.0171503	0.00475721	-0.00138066	0.00616672	0.0022864	1.50296e-05	0.00241856	0.00150579	-0.00234396	-0.00128327	0.0021778	-0.000178212	-0.000861133	-0.000183919	2.81207e-05	0.000351012	-0.000129252	0.000628016	0.000123508	0.000252655	2.36508e-05
MR0750_TraceCoords	G31	-0.0987399	0.0139345	-0.0117671	-0.00202749	0.0016189	0.00632251	-0.00131705	0.00250862	0.002606	0.000520408	-0.00284508	-0.000615047	-0.00104053	-0.000880543	0.000536623	-0.0004178	-0.000388956	-0.000413818	-0.00012653	3.6537e-05	7.1425e-05	0.000231377	0.000155194	7.65473e-06
MR0751_TraceCoords	G31	-0.106067	0.0183102	-0.0181914	-0.00389859	0.00172552	0.0103485	0.000914292	-0.00203972	-1.09426e-05	0.000321742	-0.00324848	-0.000397234	-0.000459095	-0.000326416	-0.000605738	-0.000262908	-0.000217551	-0.000926382	4.22761e-05	3.80151e-05	0.00040541	0.000353921	0.000288433	-1.18492e-05
MR0752_TraceCoords	G31	-0.00496209	-0.0504637	0.00924155	0.00239113	-0.000272839	0.00486978	-0.00581739	0.000940895	0.00220004	0.00128006	-7.41856e-05	0.00155176	0.000924241	0.000941306	0.000270592	0.00081341	-0.000151357	0.000156894	0.000695765	0.00038964	8.73174e-05	-0.00015853	-4.98813e-05	-2.63519e-06
MR0754_TraceCoords	G31	-0.0094833	-0.00594518	-0.00923969	-0.0144075	-0.00753857	0.00431716	-0.0027585	-0.0029854	0.00319844	-0.000210211	-0.000748559	-0.000620399	0.000601409	0.000711548	0.000180643	7.19422e-05	0.000246712	0.000303809	-0.000218443	-0.000107821	0.000170357	0.000124149	-0.000208271	4.46188e-06
MR0755_TraceCoords	G31	-0.0075712	-0.00860136	0.023165	0.00591293	0.00141969	-0.00200489	-0.00217131	-0.00332086	-0.000855649	-0.00136742	-0.00341649	0.00171372	-0.000785677	-0.000441146	-0.000599991	0.000212673	-4.06582e-05	-0.000157636	0.000536018	0.000182713	-0.000110648	-0.000181674	-0.000120314	-8.17859e-06
MR0758_TraceCoords	G31	0.0189538	0.00107555	0.00661676	-0.00594056	-0.00288887	-0.00145207	1.66181e-05	-0.000104342	0.000662479	-0.00171088	0.000548374	-0.000315773	0.000632361	-0.00126461	0.000824805	-5.40458e-06	-0.000176058	-1.01365e-06	0.000356387	0.000106636	0.000361298	-0.000241762	-7.01699e-05	-9.23538e-06
MR0760_TraceCoords	G31	0.00551145	-0.00223519	-0.00641664	-0.0113684	-0.00624722	-0.00460615	-0.0035488	-0.00243734	0.00593476	-0.00316982	-0.000276594	-0.000596169	2.14651e-05	-0.00028181	0.000584938	-9.17244e-05	-0.000117026	-2.43961e-05	3.70155e-06	-0.000371064	-0.000257266	-2.31391e-05	5.00427e-05	7.55566e-06
MR0763_TraceCoords	G31	0.1219	0.00831669	-0.00693479	0.0074144	0.0106328	-0.00081177	-0.00151134	0.00139883	-0.00317218	-0.000247445	0.00171696	-0.000762878	0.00281613	0.000858959	0.000187823	-0.00144042	-6.99856e-05	-0.000110768	-0.000629038	1.28862e-05	4.90718e-05	0.000429354	0.000223984	-5.998e-06
MR0765_TraceCoords	G31	0.0566575	0.0205752	-0.00101067	-0.00580522	-0.00176622	0.0101254	0.00357253	-0.000166865	-2.56964e-05	-0.00315012	0.000473109	0.00183749	-0.000994599	-0.00123346	-0.000111585	-0.0009915	7.93909e-05	0.000659094	5.47861e-05	3.83827e-06	-0.000128529	-4.22087e-05	-6.62766e-05	-1.75392e-05
MR0767_TraceCoords	G31	0.0645568	7.32858e-05	-0.00327738	-0.00423759	-0.000816484	-0.00793133	0.00242795	0.00253023	0.000242845	-0.00446243	-0.00168372	0.000333797	0.00220927	-0.000754906	0.000293599	0.00174815	-0.00139055	-0.000281101	0.000246039	0.000150708	-0.000160782	-0.000211014	9.92089e-05	1.61341e-05
MR0768_TraceCoords	G31	0.0611493	0.0100606	0.0114651	0.00262223	0.00180127	0.00462173	0.00442146	0.00111334	0.000804817	-0.000639604	0.00168983	-0.00197621	-0.00095147	-0.00127724	-0.00163677	-0.000777049	3.14829e-05	0.000247226	-1.35088e-05	9.22657e-05	-0.000120396	-0.000199198	-0.000229016	6.6404e-06
MR0769_TraceCoords	G31	0.0542479	0.0251491	-0.0439894	0.0221132	-0.0116794	-0.0167653	0.00343112	0.00661449	-0.00510697	-0.000417994	-0.00289399	0.00925001	-5.65203e-05	0.00342576	0.00052163	0.000626885	0.000474836	-0.000510543	0.00180273	-0.000297177	-0.000407879	-1.81195e-05	-1.9332e-05	-3.29319e-06
MR0770_TraceCoords	G31	0.00668379	0.0417325	-0.00910159	0.00693982	-0.00624717	-0.0045274	-0.00496789	0.00397473	-0.00194844	-0.000614896	7.63755e-05	0.00231555	-0.000541201	0.000195165	0.000154996	0.000736381	0.000874604	0.000391469	-0.000165628	0.000445705	0.000184346	0.000152409	0.000193981	5.0965e-07
MR0771_TraceCoords	G31	0.0508766	0.00711311	0.013412	0.00376036	0.00168467	0.000143369	-0.00220063	-0.000350793	-0.00171178	-0.00174821	-0.00179029	-0.000734357	-0.000776682	-0.00104261	8.92721e-05	-0.000458548	-0.000529614	0.000122041	4.63932e-05	-8.55616e-06	-0.000117614	0.000220834	-9.07029e-05	-1.09106e-06
MR0773_TraceCoords	G31	0.00587285	0.0123709	0.0162656	0.0028278	-0.000984495	-0.000187208	-0.00210031	0.00267461	0.00351029	0.000250311	-0.000381033	-0.000878424	-0.00181359	-0.000214853	-0.000547909	0.000367163	-0.00106104	0.000973242	0.000428148	-0.000152253	-0.000377764	-8.77918e-05	0.000558497	9.90618e-06
MR0778_TraceCoords	G31	0.0681229	0.0202062	-0.00174736	0.0042435	-0.0002457	0.00124192	-0.00253129	-2.02084e-05	0.0010437	0.000197166	-0.0020325	0.0010722	0.000729755	0.000663438	0.000778485	-0.000156922	-0.000293537	0.000377954	-2.34507e-05	0.000393437	-0.000255702	8.15723e-05	6.82384e-05	2.86406e-06
MR0781_TraceCoords	G31	-0.0754098	0.00770324	-0.0128705	0.00166963	-0.00410487	0.00239463	0.00725327	0.00449932	0.00102988	-0.00354052	0.000127785	0.000172187	-0.00110544	-0.000801017	0.000778244	0.00104123	0.000223753	-0.00130573	-0.000163836	0.000145905	-0.000128317	0.000135529	-4.75924e-05	2.73113e-05
MR0783_TraceCoords	G31	-0.070486	-0.0236924	0.0043511	0.00733261	0.000255546	0.00216955	0.00459732	0.00230887	-0.000681793	0.00230876	0.00157389	0.00131321	-5.54516e-05	-0.000293104	0.000669625	0.000723121	0.000109717	-0.000225925	4.56075e-05	0.000236702	-0.000106064	1.15034e-05	2.61289e-06	-4.90769e-06
MR0784_TraceCoords	G31	0.0787823	0.0143196	-0.00163509	0.00950516	0.000421612	0.00957561	0.0038723	0.00697258	0.000709229	0.00118299	0.00175727	0.00257634	-0.000718535	-0.000379961	-0.000683596	-0.00161796	0.000986874	0.000499724	0.000363932	-0.000361757	0.000276057	-0.000231774	-0.000236792	-1.80516e-06
MR0787_TraceCoords	G31	-0.0844479	-0.00111139	-0.0137176	-0.00234488	-0.00179517	-0.00298368	-0.00048307	-0.000115476	0.00300691	-0.001165	-0.000121402	-0.00167423	0.000311101	-0.000481853	-0.000539943	0.000124105	0.000223918	-0.000222702	-0.000494022	-8.37973e-05	-7.87304e-05	0.000156544	-3.75935e-05	6.80262e-06
MR0788_TraceCoords	G31	0.148967	0.00146992	-0.016176	0.000174668	0.018298	-0.00303192	-0.00412547	-0.000541138	0.000383916	-0.00138398	-0.000707919	0.0017699	0.00106716	0.000736145	0.000656045	0.000451759	-0.000223791	-0.0012058	0.00016355	9.345e-05	-0.000359001	0.000217766	0.000263945	9.5494e-06
MR0790_TraceCoords	G31	0.106101	0.0049194	-0.0115908	0.00812627	0.00467148	-0.00115118	-0.00471776	0.00338192	0.000841927	0.000835804	0.00201703	-0.000114322	-0.001796	0.0027962	0.000669545	-0.00141709	0.0010109	0.0010172	0.000460626	-0.000288024	0.000379555	-4.48062e-05	0.000301948	-1.45521e-05
MR0793_TraceCoords	G31	0.096118	0.0187742	-0.0130334	0.0126767	0.00189454	-0.00179237	-0.00245462	0.00644102	0.00244555	-0.00200047	0.000609139	0.00274209	-0.00126556	0.00253141	-0.000437803	-0.00164592	-0.000213458	0.000589535	0.000580832	0.000579183	0.00010839	-0.000324024	-0.000117907	-9.64218e-06
MR0795_TraceCoords	G31	-0.12967	0.0382097	-0.00847755	0.00305818	0.0112943	0.0123813	0.00471328	-0.000292351	0.000867545	-0.0016107	0.00026558	-0.00172145	6.2644e-05	0.000927603	0.00181185	0.00145733	-0.000581987	-0.00144316	0.000551181	-0.000531997	-0.000114203	0.000469886	-0.000305869	1.74855e-05
MR0802_TraceCoords	G31	-0.0613039	0.000711141	0.0140959	0.00223456	0.00224104	0.00502639	-0.00501772	-0.00286803	-0.00446298	-0.00052312	-0.000908233	0.00163112	-0.000407301	0.000561044	0.00194301	0.000536626	-0.000973515	0.000238178	0.000370021	0.000300113	0.000116968	-0.000221633	-3.42547e-05	1.12248e-05
MR0805_TraceCoords	G31	-0.0453877	-0.0144215	0.000961676	-0.000726358	-0.00395612	0.00603636	0.00170848	-0.00034808	-0.000390946	0.00174465	-0.00222162	0.000593725	0.000809411	-2.21177e-05	0.000653852	8.19252e-05	-0.000398305	-0.000386544	0.00022376	0.000308324	0.000246447	7.82537e-05	0.000172485	2.12845e-06
MR0808_TraceCoords	G31	-0.0826046	0.0113506	0.00959693	-0.00338122	0.00523127	-0.00826193	-0.00142174	0.00250248	-0.001198	0.00291776	0.0007269	-0.000275386	-0.000902222	0.00164598	-0.000721814	-0.000659535	0.000191065	-0.000240734	-0.000164197	0.000351831	-0.00045716	0.000221821	-8.78319e-05	-1.59037e-05
MR0810_TraceCoords	G31	-0.0413079	0.00592491	-0.0158806	-0.0103929	-0.00843312	0.0123753	0.000622574	0.00545816	0.00222771	0.00168221	-0.00369506	-0.000757499	0.00180989	-0.000913838	-0.00152481	-0.000534456	-0.000604464	-0.000419767	-0.000926393	0.000350531	-0.000466001	-0.000285911	-3.22977e-05	1.67213e-05
MR0811_TraceCoords	G31	0.00428941	0.00692638	0.00883939	0.000311741	-0.00338204	-0.00305298	0.00160176	0.00126888	-0.00240436	-0.000319915	0.000906348	-0.00136613	-0.000939681	8.42432e-05	-0.000291608	0.000392247	-0.0003829	5.74691e-05	-0.000108463	-0.000135702	9.12976e-07	0.000170593	-6.37688e-05	-3.81832e-06
MR0817_TraceCoords	G31	0.0508473	-0.00963303	0.00401033	0.00524812	-0.00267465	0.00567582	0.00882624	-0.00372088	-0.00119493	-0.000325327	-0.00214262	3.73206e-05	-0.00190403	0.000838039	0.000603109	-0.000271662	-0.000424616	0.00107287	-0.000530374	0.000680905	-8.32153e-05	4.52494e-05	3.43768e-05	-2.21999e-05
MR0818_TraceCoords	G31	0.0846219	-0.00981199	0.00274724	0.0178208	0.00313488	0.00566948	-0.000615727	0.00108228	0.00347805	-0.00439698	0.00301755	-0.00244498	-0.00156819	-0.00186674	0.000137084	-0.00120973	0.00206377	-0.000359064	0.000788069	0.000432324	0.000575275	-0.000185491	0.000174302	6.70372e-06
MR0820_TraceCoords	G31	0.0177198	-0.00815726	0.0217813	0.00386457	0.000438713	0.00627568	0.00597095	0.00380245	-0.000488752	0.000138925	0.000312983	-0.0005602	-0.00197795	-0.00106927	0.0013296	-0.00111987	0.0004717	0.000942529	2.72182e-05	-0.00066569	0.000503203	0.000177973	0.000171387	-8.20186e-06
MR0821_TraceCoords	G31	-0.133254	-0.0108707	0.00147139	0.00313411	0.0138735	0.00792464	0.00322647	-0.00210452	-0.00177655	0.000916059	0.00045254	0.00196256	0.00230628	0.000531118	-0.000165888	-6.0972e-05	2.75245e-05	-0.000180985	0.000149664	-0.000323208	0.000612736	-0.000248844	-5.04388e-05	1.56094e-05
MR0823_TraceCoords	G31	0.0964928	0.0245227	-0.00662013	0.000466855	0.00465531	0.00194856	0.000564748	0.000459303	0.000388331	0.000217327	0.00279723	0.0026319	-0.000463047	9.56747e-05	-0.000462852	-0.0015137	-0.00042552	0.00021932	1.07935e-05	8.70848e-05	-0.00013223	-0.000172354	0.000258331	1.20547e-05
MR0827_TraceCoords	G31	-0.0640779	0.0429252	-0.000571767	0.0198199	-0.00134078	0.00449364	0.00583433	0.00134908	-0.00202142	0.00798624	4.45798e-05	0.00022578	0.00042398	0.000204903	0.00132949	0.00279716	0.00147393	-0.000145606	0.000140174	-0.000240233	-0.000254595	-0.000949603	0.000381739	-2.23994e-05
MR0828_TraceCoords	G31	-0.031802	-0.004213	-0.000315788	0.00761493	-0.00627828	0.00148683	0.00612869	0.00631784	0.00237159	-0.00162703	0.00117978	-9.93597e-05	-0.00144304	-0.000806511	0.000500223	0.00128918	-0.000240292	-0.000654546	-0.000435456	0.000135777	-7.27379e-05	-0.000135992	-5.5799e-05	3.73202e-06
MR0829_TraceCoords	G31	0.0534457	0.0280848	-0.00427538	-0.00151402	-0.00257259	0.000724416	0.00228839	-0.00194813	-0.00276422	0.0017824	0.00221415	0.000218951	0.00110022	0.000234867	0.000593856	-0.000794305	-0.000374795	0.000484331	-0.000419743	-0.000341254	-9.83474e-05	-0.000111761	0.00024342	-4.57263e-06
MR0835_TraceCoords	G31	-0.0457842	0.0157526	-0.000728045	-0.00576659	-0.00359167	-0.00365804	0.0047136	0.00625916	0.00225729	-0.000306514	-0.00266406	0.000109585	0.00149069	-0.00081173	-0.000845287	-5.35272e-05	-0.00035873	-0.000293871	-0.000315078	0.000154925	-0.000324177	-0.000129545	6.1262e-05	8.71432e-06
MR0836_TraceCoords	G31	-0.10041	0.0151149	0.000650274	0.006843	0.00453637	0.00645378	0.000499345	0.000759687	0.00145433	0.000686736	0.000454949	-0.000544801	0.00154458	-0.000359737	-0.000173351	0.00117973	-0.000306012	-0.000155369	-0.000144266	-0.000332822	-6.02164e-05	0.000103245	1.86606e-05	5.85267e-06
MR0838_TraceCoords	G31	-0.0774394	0.0067943	-0.00465522	-0.00475064	-0.00128954	0.0066699	0.00471696	-0.00375352	-0.00275597	0.000970524	-0.00211257	-0.000525911	0.000152894	0.0011344	4.07034e-05	0.000177151	-0.000380291	-0.000717065	0.00024969	0.000325742	5.72267e-05	0.000137927	1.42862e-05	-1.20333e-05
MR0839_TraceCoords	G31	0.132216	-0.00609611	-0.0086251	0.00866184	0.0133384	-0.000996389	-0.000127058	-0.000634901	-0.000809548	0.00388861	-0.00275399	-0.00111088	-0.000469262	0.00166712	-0.000444415	-0.000799592	-0.000121153	-0.00143532	0.000365082	-0.000434266	0.000438862	8.73497e-05	-0.000597606	6.18787e-06
MR0842_TraceCoords	G31	-0.0806082	0.005226	-0.000513328	-0.00266796	0.00039829	0.0103987	-0.000319362	-0.005723	0.00361644	-0.0017625	-0.000868475	0.000663212	0.000439609	0.000931793	-0.000471485	0.000145198	-0.000657459	-0.000293837	4.626e-05	-0.00043349	0.000390868	-3.68128e-05	-0.000231453	3.44811e-06
MR0844_TraceCoords	G31	-0.0260363	-0.0256056	0.0159956	-9.1025e-05	1.55296e-05	0.00540468	-0.000975299	0.00106268	0.000463183	0.000889721	-0.00261232	0.00254559	0.00179929	-0.000104652	0.000774123	0.000419184	-5.42215e-05	-0.000197764	0.000106089	-4.28011e-05	0.000158333	0.00033373	-1.74052e-05	-9.83446e-06
MR0850_TraceCoords	G31	0.0261137	0.0162622	-0.00907982	0.00189822	-0.00766019	0.00551677	2.61749e-05	-0.000270814	-0.000580955	-0.00144986	-0.000401477	0.00298437	-0.00114448	0.000225377	0.00104266	-0.000184198	6.395e-05	-0.000173445	0.000253931	-0.000261131	-0.000115124	-0.00054524	-4.21337e-05	9.70908e-06
MR0851_TraceCoords	G31	0.00894445	-0.000450904	0.0156175	-0.00891995	-0.000366079	0.00833378	-0.00391043	0.0010504	-0.00204482	0.00054323	0.00118028	1.62765e-05	-0.00110401	-0.000473344	0.000570093	-7.11026e-05	0.000196209	-7.54464e-05	0.000230097	-0.000127793	5.5625e-05	-1.05108e-05	5.41824e-05	1.37863e-06
MR0853_TraceCoords	G31	0.0121144	0.00210181	0.00892746	0.00148411	-0.00341455	-0.0061495	0.00850319	-6.01151e-05	0.000783108	0.000802238	-0.000341863	-0.000152143	0.00197729	-0.00102519	-0.00108994	0.000100638	-0.00036809	7.272e-05	-3.99734e-05	6.9305e-05	5.40447e-07	-0.000322601	-3.50322e-05	-1.47688e-05
MR0857_TraceCoords	G31	-0.051053	-0.0167321	-0.00389208	0.00231604	-0.00489167	0.00580945	0.00153846	-0.00184655	-0.000302537	0.00187112	0.000838161	0.000308366	0.00125089	-0.000695505	-0.000609072	0.000671684	0.00031163	-5.85443e-05	0.000225187	0.000446888	0.000200363	-0.000185242	-7.29339e-05	9.62953e-06
MR0860_TraceCoords	G31	-0.0793497	0.0225567	-0.0140386	-0.000961731	-0.0030331	0.00862745	0.00284001	0.00228548	-0.00203337	-0.00141654	0.00100499	-0.00140108	-0.00317153	0.00107777	0.000429008	0.000161056	-0.000131273	-0.00160902	-0.000112885	3.65576e-05	2.8214e-05	0.000182477	6.27264e-05	-2.23978e-05
MR0861_TraceCoords	G31	-0.0190704	0.00920461	-0.000459249	-0.00901628	-0.00489309	-0.00505084	0.00244902	0.00264844	-0.000515189	0.00354554	0.00207995	-0.0011213	0.000790578	-0.000485821	0.0015191	0.000233451	0.000169907	-3.08508e-05	-0.000203436	-0.000157727	-8.74459e-05	-8.87015e-05	9.32189e-05	2.48926e-05
MR0863_TraceCoords	G31	-0.0527118	-0.00274852	0.00950541	-0.00400661	-0.000618535	0.00639746	0.0021372	0.00533254	-0.00278898	0.00324592	0.00125844	-0.000158313	-0.000356887	0.000575595	-0.000443325	-0.000161449	0.000264326	-0.000624022	7.85732e-05	-0.000138805	1.21472e-05	-0.00011247	7.10817e-05	-1.20265e-05
MR0865_TraceCoords	G31	-0.0609079	0.00221198	0.0107534	-0.0108788	0.00285258	-0.0134926	0.00482317	0.000479309	-0.00170746	-0.00240026	0.00192364	0.00384965	0.00116905	0.00273434	0.00233245	-0.00156622	0.00138733	-0.000409849	-0.00136526	-0.000582176	2.03653e-05	-0.000288965	-2.84983e-05	2.55814e-05
MR0866_TraceCoords	G31	-0.0221484	0.014393	0.0140071	-0.000946996	-0.00033086	-0.0081789	-0.00344786	0.00114558	-0.00146041	0.000851741	0.00109228	-0.00164604	-0.00113765	0.000832401	-0.000440137	0.00046806	-0.00030255	-0.000157498	-0.000198017	0.000289637	1.75659e-05	-0.000160648	0.00010459	-6.89437e-06
MR0867_TraceCoords	G31	-0.0578194	-0.0339638	-0.00583213	-0.00102619	-0.00312086	0.0100709	-0.00551457	0.000121608	-0.00141709	-0.00182641	0.00209116	-0.00014715	0.000582547	0.00167245	0.000276541	0.000648643	-0.000765268	0.00052978	-6.48435e-05	0.000506783	0.000145399	-0.000228909	0.000101203	2.61593e-06
MR0869_TraceCoords	G31	-0.0668898	-0.0101148	-0.00214284	-0.00273853	-0.00217589	0.00873732	0.000459312	-0.00265485	-0.00179826	-0.00107143	0.000837103	0.000981681	-0.00178038	0.000487241	-0.00157657	0.000235213	-0.000323109	-0.000414425	-0.000119752	0.000454594	-2.72633e-05	9.72278e-05	0.00012453	3.43344e-06
MR0873_TraceCoords	G31	0.0268826	-0.00539351	0.0207657	-0.00229583	0.00202179	-0.000264652	-0.00156409	-0.00278225	0.000803012	-2.54811e-05	-0.00284156	-0.0001256	-0.000194502	-0.000360475	0.000290686	-0.000896991	-0.000180588	0.00025376	0.000187139	-0.000289006	-0.000385134	0.000454138	6.07036e-05	-5.60762e-06
MR0874_TraceCoords	G31	-0.0480287	-0.00201207	0.00471246	-0.00667836	-0.00196219	0.00436636	-0.00296953	-0.00123935	0.00038454	-0.00525272	0.000644618	-0.000289272	0.00214485	-8.30783e-05	-0.000356176	0.000125478	0.000179247	-0.00025024	-0.000136748	7.28406e-05	0.000497535	-6.04191e-05	6.65496e-05	-8.01609e-06
MR0876_TraceCoords	G31	-0.0211883	-0.0202418	-0.0044387	-0.0148839	-0.00555442	0.00825499	-0.00296772	-0.00287946	-0.000842695	0.00189004	-0.000866943	0.000173506	-0.000579996	0.00121668	-0.00186495	-0.000428514	0.000167266	0.000264208	-0.000180213	0.000610116	5.3082e-05	7.34301e-05	1.03742e-05	1.07736e-05
MR0878_TraceCoords	G31	0.0794731	-0.0141132	-0.001715	0.0144048	0.000245993	0.00726959	0.00606443	0.00158035	0.00123859	-0.00250223	0.00302052	-0.00153519	-0.002392	-0.000486296	0.000174703	-0.00142842	0.000961016	0.000253805	9.27801e-05	0.000161267	0.00029194	-0.000583178	0.000401802	-1.77728e-05
MR0880_TraceCoords	G31	-0.118093	-0.0214696	-0.00377423	0.00575801	0.00857459	0.0075619	-0.000737282	0.00467399	-0.003681	0.00329732	0.00223214	0.000561978	0.00192649	-0.0007894	0.000370387	4.73053e-05	-0.00082139	-0.000232634	-1.48258e-05	0.000691553	3.08986e-05	-0.000303412	-0.000157114	4.82664e-06
MR0881_TraceCoords	G31	-0.0449415	-0.00773378	0.0174187	0.00431477	0.000346737	0.000977437	0.0100823	0.00274249	0.000457382	0.000445211	0.00133606	0.00113503	0.000284173	0.000181247	0.000816869	0.000225339	0.000262904	-0.000592223	-0.000254837	-5.55317e-05	2.51578e-06	0.000270456	1.76971e-05	7.66534e-06
MR0885_TraceCoords	G31	-0.103064	-0.0108623	-0.00229487	0.0072287	0.00444316	0.0121614	-0.00309961	0.0042025	0.000815664	-0.00123692	0.00247994	0.000774507	0.00131335	-0.00118575	-0.00145411	0.00118018	-0.00108475	-0.000728569	-0.000361919	0.000367926	2.0797e-05	-0.000159802	0.000222435	7.31308e-06
MR0887_TraceCoords	G31	0.0123239	-0.00416601	0.00930517	0.000602511	-0.00317652	0.00168529	-9.32923e-05	0.00176585	0.000202731	-0.00215272	0.0010782	-0.000175867	-0.000998101	-0.000207083	-0.000597674	-0.000225576	0.0001279	-0.000268283	0.00015522	-0.000125646	-0.00022556	-9.0535e-06	2.17742e-05	9.97283e-08
MR0889_TraceCoords	G31	0.0895452	-0.0122212	-0.00583424	0.0134133	0.00218743	0.00294261	-0.00348593	-0.000980956	0.0016846	-0.000965834	-0.00353785	-0.000192066	0.00104144	-0.000680182	-0.00220141	3.32901e-05	0.00170697	-0.00151825	0.000582265	0.000169283	-5.64714e-05	0.00019215	-0.000489089	-1.15983e-05
MR0890_TraceCoords	G31	-0.0613757	-0.0106999	-0.00249524	-0.00276615	-0.00292443	0.00360613	0.00170896	-0.00162108	-0.0010624	-0.000579819	-0.00349501	0.00137996	-0.00105931	0.000178318	-0.000636763	3.46353e-06	-0.000500755	-0.000141107	-9.04882e-05	0.000198189	0.000281494	0.000387774	0.000129702	-8.75202e-06
MR0901_TraceCoords	G31	-0.0472004	-0.00825617	0.0199065	-0.00396844	0.00220683	0.00729092	-0.0010446	0.00407309	0.000303214	0.00136235	-0.00186057	0.000618906	0.00221218	0.000957728	-6.74496e-05	7.00267e-05	-1.88948e-05	0.000382009	0.00040166	6.65531e-05	-5.14503e-05	0.000342527	0.000211643	-2.65135e-06
MR0902_TraceCoords	G31	0.0520456	0.00384321	0.0110713	0.00767433	8.74497e-05	0.010477	0.000143785	0.00291995	-0.000344493	-0.00307094	-0.000988956	0.000734062	-9.40486e-05	-0.00182899	-0.000808832	-0.000978912	0.000933627	0.000112411	0.000141548	4.94432e-05	-0.00026593	-0.0002075	-0.000365697	-1.41554e-05
MR0903_TraceCoords	G31	0.00481646	-0.000770198	0.0114478	-0.00487136	-0.00197351	-0.0017214	-0.00144529	-0.00191166	-0.00242527	-0.00188766	-0.000945569	-0.000684902	0.00156848	-0.00048661	-0.00144715	-2.01105e-05	0.000295057	-0.000100265	-0.000131213	-8.36551e-05	9.79163e-05	-0.000229955	-7.73054e-05	4.81512e-06
MR0904_TraceCoords	G31	0.072264	-0.0125023	0.0110324	-0.000325039	0.00475125	-0.00827488	0.00393023	-0.000713181	-0.000829923	-0.00139633	-0.00127897	-0.00125655	-0.00290291	0.000165267	-0.000305262	0.000295436	-0.000765105	4.28488e-05	7.398e-05	3.88224e-05	0.00011687	-0.000343005	5.94725e-06	-6.89396e-06
MR0905_TraceCoords	G31	0.0366251	-0.020914	0.0215912	0.000428794	0.00287255	-0.0048422	0.010097	0.00366255	-0.000288418	-0.00192788	-0.00207193	0.00200931	-0.00177544	0.000668881	-0.000286012	-0.00133781	0.000749169	0.000341722	-0.000429417	-0.000544095	0.00033533	-0.000246824	5.97915e-05	-1.44656e-06
MR0906_TraceCoords	G31	0.0424207	0.0232875	0.001578	0.00215139	-0.00191672	-0.00259172	-0.00592969	-0.00137335	-0.00206809	-0.000640419	-0.00111553	0.000592662	0.00105218	-0.000334925	0.000243168	0.000349169	0.000188763	0.00011484	7.087e-05	0.000216125	-0.000201169	6.81053e-05	0.000117883	-1.3389e-06
MR0907_TraceCoords	G31	0.0287513	-0.0199873	0.00470678	-0.00525855	-0.00307818	0.000575386	0.00361098	-0.00464099	-0.000615058	-0.00327723	0.000912196	-0.000733982	-0.000590089	0.000849902	-0.000417764	0.000556834	0.000488071	0.000516116	-0.0001217	9.95395e-05	-0.000171211	-0.000130556	0.00027573	3.39989e-06
MR0908_TraceCoords	G31	-0.0724951	-0.0223889	-0.0108312	-0.00384579	-0.00224671	-0.00539385	0.00099646	-0.0021745	-0.000869124	-0.00479533	-0.000863165	0.0014289	-0.00124504	-1.61178e-06	-0.00121503	-0.000405974	0.000486185	-0.000383074	0.000275651	-0.000252318	-9.29142e-05	0.000353511	0.000388113	-1.08709e-05
MR0910_TraceCoords	G31	-0.112069	-0.00072554	0.00432335	0.00688067	0.0084194	0.0057063	0.00209096	0.00399771	-0.00340193	0.00146549	-0.000976399	0.000772306	0.000303943	-0.000671192	0.00105909	0.000812438	-0.000493953	-0.00017982	-0.000150126	0.000200938	0.000488728	0.000149837	0.000149484	9.722e-07
MR0911_TraceCoords	G31	-0.109716	0.0170738	0.0127283	0.0111326	0.0100345	0.00455735	0.0147897	0.000724404	-0.00437266	-0.000318264	0.00227192	-0.00100283	-0.000912294	0.000753932	0.00258463	0.00149572	0.00038086	-0.00178381	0.000338949	0.000448386	-1.61746e-05	0.00049942	-0.000345824	-8.61701e-06
MR0912_TraceCoords	G31	-0.0133281	0.0100988	0.00545446	0.00679022	-0.00549914	0.00120059	0.00740633	-0.000781801	0.00328687	-0.00372554	-0.00075701	-0.000263813	-0.00069821	0.000461573	-0.000173482	0.000571654	-0.000555376	-5.22281e-05	-0.000241107	0.000220177	-0.000212369	0.000182448	-0.00022051	-5.99804e-06
MR0913_TraceCoords	G31	0.025243	-0.00316562	0.00776386	0.00823793	-0.00407832	0.00182089	0.00825182	0.00116422	0.00281691	-0.00151975	0.0016309	-0.000791947	0.00033267	-0.000700949	0.0010864	0.000149762	-7.817e-05	0.000400572	0.000195339	0.000138134	0.000138198	-0.000179997	0.00019651	1.07506e-05
MR0914_TraceCoords	G31	-0.0963294	-0.0063011	-0.0017032	0.00342113	0.00403516	-0.00760921	0.00133826	0.000875651	-0.00427595	0.00155268	0.000609017	0.000705485	-0.000886607	-0.000196933	-0.00127602	-1.97872e-05	0.000464975	-0.00071933	3.51648e-05	0.00054353	-0.000282598	0.000124071	8.50769e-05	-8.41046e-06
MR0915_TraceCoords	G31	-0.140994	0.00801884	-0.0150253	0.0071965	0.0117129	0.00826978	-0.00151172	-0.00444364	0.00118662	-0.00203688	0.00354808	-0.00129184	0.000893532	-0.000847901	-0.00109105	0.00126417	-0.000102482	0.000459902	-0.00028437	-0.000512703	0.000198295	2.7013e-06	-3.9773e-05	-1.79041e-05
MR0916_TraceCoords	G31	0.0802608	0.0134738	-0.00549763	0.00747608	0.000286064	0.00201285	-0.000280052	0.00117633	-0.0017301	-0.00200516	0.00119721	0.000662478	-0.000412419	0.000887109	0.000150227	-0.00171807	9.89964e-05	0.0003276	-0.000221171	-0.000196101	-0.000123112	-0.00032907	-9.36042e-05	-1.29374e-06
MR0917_TraceCoords	G31	0.0328875	0.0215294	-0.00418414	0.00753132	-0.00563177	0.00145113	-0.00165388	-0.0001867	-0.00154632	0.00250066	-0.000823947	0.0013313	0.000495528	0.000202872	-0.000591719	-0.000869936	0.00035475	-3.6876e-06	-0.000191747	-0.000246342	1.89697e-05	-3.84042e-05	6.31272e-05	-9.98995e-06
MR0919_TraceCoords	G31	-0.0197523	0.00507143	0.00379002	-0.00244389	-0.00421994	-0.00915905	0.00563779	0.00299832	0.0044981	-0.00194051	-0.00112583	0.00159306	0.000346991	-0.00037443	-0.000158215	-3.62679e-05	-0.000132745	-0.000232447	-4.19892e-05	0.000511467	1.0912e-05	-0.00032322	2.7368e-05	4.09832e-06
MR0920_TraceCoords	G31	-0.110268	0.0390111	0.0205017	-0.00556711	0.0164751	0.000785595	-0.0052923	-0.00237582	-0.000583802	7.47439e-05	0.000431605	-0.00264783	-0.00120392	0.00411261	0.000264593	0.000389335	1.02078e-05	0.000900558	0.000512416	-0.000135003	-0.000252256	6.5989e-06	0.000251813	2.9884e-05
MR0922_TraceCoords	G31	0.0325442	-0.000688168	0.00909961	0.00183661	-0.00149678	-0.00459053	-0.00192309	-0.000404452	-0.00274282	-0.000734657	0.00130868	-0.00106528	0.000287786	-0.000194674	-0.000270304	0.000352862	-0.000435112	2.26277e-05	-8.55093e-05	-4.25513e-05	0.000238291	3.04844e-05	-0.000181313	1.88924e-05
MR0924_TraceCoords	G31	-0.00148151	0.0041074	0.0184739	-0.0105994	0.000751091	-0.00701105	0.00519286	-0.000250997	-0.00103007	-0.00153004	-0.00122595	0.00189026	0.000211846	0.00145142	0.000672492	-0.000669531	0.000373979	-0.000266641	-0.000839708	-0.000137043	6.30733e-05	-0.000152108	0.000103166	2.5557e-05
MR0926_TraceCoords	G31	0.0464128	0.0051697	0.0118446	-0.000314763	0.000991719	-0.00155906	-0.00166712	-0.00275086	-0.00424834	-0.000351561	-0.000415212	-0.000521011	-0.00103528	-0.00059525	-0.000171234	-4.27472e-05	-2.56387e-05	-0.000138758	-0.000609665	-0.000217325	0.000268247	-0.000247029	-7.96038e-05	-2.62313e-06
MR0930_TraceCoords	G31	-0.0881066	0.0103338	0.00354396	0.0063554	0.00282954	0.000386892	0.00274428	0.00455007	-0.002446	0.000619669	0.000472083	-0.00137154	-0.00180753	1.69363e-05	-0.000120313	0.0011736	0.000210128	-0.000516265	-5.72424e-05	0.000281332	0.000154239	0.000147722	7.3321e-05	-1.46709e-06
MR0931_TraceCoords	G31	-0.030638	-0.0112945	0.0102838	-0.00621107	-0.00144271	0.00193018	-0.00287678	-0.000220972	0.000204588	0.00117216	-0.00306973	0.000682743	0.00169981	8.38178e-05	-0.000214744	-0.000468522	-0.00019963	1.30688e-05	0.000159059	-2.85508e-05	-0.000173917	3.96933e-05	7.95178e-08	5.77437e-06
MR0934_TraceCoords	G31	-0.072366	-0.0494072	-0.0169982	0.00841682	-0.00252559	-0.00346842	0.00203932	0.00179365	-0.00261884	-0.00130302	-0.000766756	0.000371032	0.000956902	-0.000538876	-0.000175799	-0.000149321	0.000200055	0.000366078	-0.000302404	-0.00038415	-0.000481941	4.30804e-05	6.00644e-05	1.09717e-05
MR0935_TraceCoords	G31	-0.00650837	0.028351	0.0199807	0.0104098	0.000764959	0.0049592	-0.00694064	-0.00421119	-0.000420737	0.00371677	0.00159156	-0.000345136	-0.00177907	0.00168145	1.70214e-05	-0.000403525	0.000747568	0.000588614	-0.000173959	-0.000370281	-4.87725e-05	-0.000471252	0.000214691	-1.08147e-05
MR0938_TraceCoords	G31	-0.00357658	0.0160592	-0.0153209	0.00695504	-0.0102349	0.00282377	-0.00180659	0.000982969	0.00165325	0.00349357	0.00256571	0.00171597	2.75197e-05	-0.000325285	0.000701681	0.000758255	0.000310962	-0.0016526	-0.00028054	-0.000412428	7.47525e-05	8.20725e-05	-0.000202136	4.27753e-06
MR0942_TraceCoords	G31	-0.161146	-0.0135718	-0.0286247	0.000728694	0.017439	0.00357197	-0.00659939	-0.00216686	-0.000410082	0.00135147	0.000586837	-0.00139773	0.00162192	-0.0023978	0.000376155	-0.00200884	-0.00069602	0.00125855	-0.000344932	0.00041947	0.000175451	-0.000675458	-3.62131e-05	-6.1164e-06
MR0944_TraceCoords	G31	0.0321933	-0.0134861	0.0193749	-0.00263746	0.00227178	0.00179976	-0.00286829	-0.00197288	0.00354993	-0.000166097	0.000937383	8.73068e-05	0.00068283	-0.00127405	-0.000476771	0.00012952	0.000260799	-0.000625494	0.000111665	0.000513885	-0.000108575	-2.93303e-05	0.000147297	2.04461e-05
MR0945_TraceCoords	G31	0.123522	-0.0172333	-0.0147558	0.00947905	0.00881156	0.00232402	-0.00245378	0.00127297	0.00280638	-0.000937071	-0.00231382	-0.000188647	-0.001943	0.00212689	1.35015e-05	0.000380668	0.00146981	-0.000754377	0.000956212	0.000259421	-0.000230926	-0.000152623	-0.000212347	2.71501e-06
MR0951_TraceCoords	G31	0.0923559	0.0180294	0.00300708	0.00286737	0.00678858	0.00241842	-0.00636312	0.00265209	0.00180937	-0.00289732	-0.0039849	0.00322232	-0.000586318	-0.00130608	0.00147628	0.000917333	9.98445e-05	-0.000422211	8.70674e-05	0.000696377	-0.000875654	-0.000151996	7.97116e-06	-6.91275e-06
MR0953_TraceCoords	G31	0.0706813	0.00892749	0.017056	-0.00483143	0.00656983	-0.00125936	0.00378848	-0.00197388	-0.000225342	0.000414215	-0.00139092	0.000442712	0.00118014	-0.00136314	0.000359558	-0.00118969	0.000220444	-6.14422e-05	-0.00123964	-0.00051453	0.000106802	-0.000670357	-0.000302407	2.91164e-05
MR0954_TraceCoords	G31	-0.00593287	0.0570704	-0.00313535	0.0064445	-0.00287298	-0.00669278	-0.00484572	0.002306	-0.00349659	-0.000727106	0.000513678	0.000328929	0.000869592	0.00104734	-0.000540313	0.000832498	0.000372286	0.00110566	-0.000403817	0.000472075	0.000285118	5.20725e-05	-0.00028079	5.14572e-06
MR0955_TraceCoords	G31	0.0896687	0.0132137	0.000920437	0.00566245	0.00508116	-0.00206499	-0.00609674	0.00146532	-0.00193854	0.000963153	-0.00304125	9.31927e-06	-0.000952257	0.00125345	0.000358492	-0.000937993	0.000250349	-8.00079e-05	-0.00018092	0.000247767	-0.000750004	0.00108585	-2.54248e-05	2.77963e-06
MR0958_TraceCoords	G31	0.0136543	-0.0137343	0.00509428	0.00795614	-0.00447262	-0.00448716	0.00452041	0.00179591	-0.000144142	-0.00124437	0.00188912	-0.00155627	0.000632516	-0.0023278	-0.00138486	0.000342238	-0.000145556	-0.000343228	0.000362129	-0.000541792	0.000298152	0.000196259	0.00046705	-2.29903e-06
MR0960_TraceCoords	G31	0.0367924	0.0236266	0.00595547	0.00885529	-0.00188474	0.000711057	-0.00522843	-0.000119322	0.00710253	0.00120074	-0.00136333	-0.00100723	0.00128589	-0.000369404	-0.00154055	-3.19829e-05	0.000471843	-0.000777718	-0.000315601	0.000919171	0.000229623	-0.000107959	-0.000383039	-1.15796e-05
MR0961_TraceCoords	G31	-0.0293132	-0.0224681	-0.000324381	-0.0125566	-0.00367994	0.00189078	-0.00291339	-6.9094e-05	-0.00113963	-0.00156407	-3.05762e-05	0.00152017	-0.000541857	0.00064935	-0.00123397	2.47781e-05	0.000553717	-9.4395e-05	-4.55229e-05	-0.000152084	0.000499559	-0.000184994	0.000251301	2.34536e-05
MR0964_TraceCoords	G31	-0.0459735	-0.0227316	0.00471275	-0.00129735	-0.00170692	0.00109283	-0.0031111	-0.00278069	-0.00397774	0.00259084	-0.000703886	0.00156663	0.000241035	0.000866284	-0.00104036	0.000165222	6.49005e-05	5.5287e-05	0.000414413	0.000372806	1.51657e-05	-0.000122426	-0.000103902	-1.28009e-05
MR0965_TraceCoords	G31	0.0615505	0.0195994	-0.0016337	0.00420194	-0.00133259	-0.000110441	-0.000453393	-0.000842642	-0.00208276	0.000356925	-0.000607814	0.000784874	0.000114959	0.00026486	-0.00099569	-0.000991616	-0.000504908	0.000302469	-0.000182732	-9.45208e-05	-0.000252256	-0.00012511	-5.47756e-05	2.65964e-06
MR0966_TraceCoords	G31	0.0370383	0.0422182	-0.00654515	0.00231691	-0.00436801	0.00227122	0.00209804	0.00691628	-0.00341153	-0.00222363	0.00234029	0.00162225	0.000221693	0.000962582	0.00108252	-0.000563748	-0.000395531	0.000553414	0.000141246	0.000264621	0.000183809	0.00016356	-0.000302695	-1.43417e-05
MR0967_TraceCoords	G31	-0.106284	0.0160677	0.0130809	-0.00626402	0.0109117	0.00175917	0.00377498	0.00370963	-0.00229889	-0.00141987	0.00155995	-0.000638752	-0.00075818	0.0025937	-0.000324118	-0.000749874	0.000291368	-0.00127791	-9.08514e-05	0.000115306	-8.43843e-05	0.000485108	3.05081e-05	1.99318e-05
MR0968_TraceCoords	G31	0.0673397	-0.0136366	-0.000234984	-0.00798425	0.00062287	-0.00220277	0.00307171	-0.00522209	0.00346257	-0.00189241	-1.43299e-05	-0.000718582	-0.000681325	0.000349264	-0.000529186	7.32367e-05	-0.000644729	3.84754e-05	-3.39123e-05	0.000567674	-0.000435757	-0.000176941	-0.000144878	-5.44447e-06
MR0970_TraceCoords	G31	0.0499026	0.0112491	0.00425832	0.0169575	-0.00205886	-5.61517e-05	-0.00267218	0.00277332	0.00119128	0.00109065	-0.00310858	-0.000602618	-0.00155263	0.000716502	-0.0012828	-0.000914744	-0.000450772	-0.000182568	0.000137542	8.69372e-05	2.64733e-05	-0.000252484	-0.00012373	8.88015e-06
MR0971_TraceCoords	G31	-0.0279429	-0.00513092	0.0214698	-0.00176818	0.0023148	-0.00103364	-0.00819991	0.000468261	-0.00116797	0.00232774	0.0016647	0.000778584	-0.00110995	0.000932102	-0.00030374	-0.000211213	-0.000755369	7.19391e-05	0.000923807	0.000436999	0.000186811	0.000100123	0.000164376	1.84558e-05
MR0974_TraceCoords	G31	-0.0184171	-0.0322635	-0.00131325	0.00501938	-0.00461102	-0.00680062	-0.00298163	-0.00132558	-0.002281	-0.00129098	-0.00131134	-0.000558466	-0.000250289	0.000350818	0.00114501	3.50514e-05	3.40911e-06	-4.81659e-05	0.000495888	-0.000385044	-0.000134364	7.75113e-05	-6.94244e-05	-2.1138e-05
MR0975_TraceCoords	G31	-0.0266776	0.00178085	-0.000434582	-0.00832379	-0.00569358	0.00660965	0.00519402	0.0015987	-0.00294526	0.000231407	-0.000318412	-0.000987905	-0.00110753	0.000535935	-0.00112784	-0.000746885	-5.7719e-05	-0.000720512	-0.000404393	-0.000292574	-3.00335e-05	5.85371e-05	-0.000218589	2.19353e-05
MR0977_TraceCoords	G31	0.048617	-0.00328464	-0.00175846	0.0142246	-0.00408706	-0.000435309	-0.00272113	0.00180491	-0.00136498	-8.39155e-05	-0.000625889	-0.00123285	0.00038585	0.000942558	0.000490736	1.00426e-05	0.000265388	-0.000270415	0.000208942	-0.000276682	0.000108414	5.74211e-05	-0.000155911	-2.39623e-05
MR0980_TraceCoords	G31	-0.0348865	-0.0117972	0.0164415	-0.0047963	0.00069999	-0.00181468	0.00314399	0.00193582	-0.00191066	0.000611601	-0.000176652	0.000920688	0.000598296	-0.00167604	-0.000295176	-0.00068993	0.00178262	-0.000220596	0.0013325	-0.000145659	0.0012299	-0.000282619	0.000600436	-6.80875e-06
MR0982_TraceCoords	G31	0.128849	-0.0232328	-0.00417932	0.0104229	0.0141319	-0.00026562	-0.00229803	0.000657779	0.00167139	2.80561e-06	-0.0024594	-0.00310752	-0.000899804	0.000871605	0.00146637	7.61117e-06	5.69475e-05	-0.000794308	0.000528267	-0.000464098	0.00032258	-6.62084e-05	-0.000195889	-1.26591e-05
MR0984_TraceCoords	G31	-0.0983116	0.00111791	-0.0179556	-0.00563548	-0.000458617	0.0114687	0.00154322	0.00448184	0.00453904	0.00284686	-0.000908683	-0.00220908	0.00090257	-0.000187455	0.00114186	-0.00120759	-0.000893376	-0.000356278	-0.00107795	0.000289866	0.000220626	8.48799e-05	0.000121842	-9.8793e-06
MR0986_TraceCoords	G31	-0.063891	-0.00801766	-0.00964291	-0.00865045	-0.00402106	0.00869115	-0.00401144	0.00542621	-0.00323467	-0.00346613	0.00195572	-0.00393315	0.0010381	0.00119591	-0.00115283	-0.00101544	-0.000272832	-0.000337856	-0.000613458	0.000147938	0.000257905	-0.000311743	0.000192944	-2.60353e-06
MR0988_TraceCoords	G31	-0.000619352	0.0373532	-0.000386685	0.00377492	-0.0037137	-0.0032057	-0.0102215	0.00699895	-0.00983794	-0.00227507	-0.00137616	-0.00112779	-0.000772653	0.00195645	0.000614973	-1.96282e-05	0.000789608	0.000315841	-0.000796591	0.000647443	0.000498555	0.000426255	-0.000450826	1.30435e-05
MR0989_TraceCoords	G31	-0.0680281	0.0106398	0.00621979	0.00158231	0.000269728	-0.00282656	0.009627	-0.000855398	-0.00249874	-0.00281555	0.00085641	-0.000107632	0.0010561	-0.000305423	0.000146024	0.000277204	-0.000323207	-0.000740779	0.000189729	-0.000145041	-0.000238505	0.000217726	-0.000153857	-7.0823e-06
MR0990_TraceCoords	G31	0.0960312	0.00264934	-0.00216552	-0.00126825	0.00498641	0.00266244	0.00354267	-0.00321785	-0.00241165	0.00125255	0.0033694	-0.000455393	-0.00125157	-2.68232e-05	4.08696e-06	-0.000702739	-0.000551465	0.000224722	-0.000899109	3.54154e-05	2.68272e-05	-8.95963e-05	0.000277114	-4.6142e-06
MR0993_TraceCoords	G31	-0.0754585	0.0294688	0.0177085	0.0201039	0.0054884	-0.000191531	-0.00373418	0.00236425	-0.00238701	0.00622489	-0.00681672	-0.00205779	-0.000213715	0.00190236	-0.00170688	0.00280429	3.79875e-05	0.00135992	-0.000414584	0.000324204	-0.000686128	-0.000371566	0.000834046	7.86409e-07
MR0994_TraceCoords	G31	-0.0115674	-0.0179221	0.00876179	-0.00610977	-0.00189996	-0.00285391	-0.00530728	0.00264996	-0.0027222	-0.000551502	-0.00318896	0.000640074	-0.000858765	0.000471642	0.000641232	-0.00019882	0.000250305	-2.15254e-05	0.000633168	-0.000376502	0.000313392	-0.00026743	1.38517e-05	-2.09693e-06
MR1008_TraceCoords	G31	0.0354888	-0.0078499	0.00613949	0.0165703	-0.00312538	0.00141524	-0.00279823	0.000387959	0.000905204	-0.00055418	-0.00138041	-0.000226827	-0.00110785	-0.000954869	-0.00104337	0.000114087	0.000331852	-0.000288416	0.000123065	-3.56155e-05	0.000121677	6.45368e-05	0.000105588	-7.65473e-06
MR1009_TraceCoords	G31	-0.082248	0.00622196	0.0180452	0.0132865	0.00533576	0.00269111	0.0106959	-0.00375791	-0.00233059	0.00147103	0.00233609	0.000734274	0.000199514	0.000559036	0.000808709	0.00136424	0.000173955	-0.00030656	0.000420582	2.76343e-05	7.24892e-05	-0.000197927	9.57775e-05	-1.26934e-05
MR1012_TraceCoords	G31	-0.107894	-0.0115632	-0.000920509	0.00268791	0.00724271	-0.000901266	-0.00503679	-0.00639528	-0.000193231	0.00274925	0.0019222	0.00105897	-0.00106245	-0.000129369	0.000197658	-0.0005597	-0.000306908	0.000685255	0.000551704	0.000169528	-0.000154142	-0.000470186	-0.00037376	9.89082e-06
MR1014_TraceCoords	G31	-0.0567086	0.00981394	0.0185793	-0.00374484	0.0026894	0.00301225	0.00921292	0.00175055	-0.00510461	0.000683994	-0.00166302	0.00065661	-0.000859352	5.57576e-05	-0.00181762	-0.0011061	-0.000162593	-0.000245635	8.63591e-05	-0.000172743	-0.000128825	0.000229328	0.000127504	-8.0443e-06
MR1016_TraceCoords	G31	0.0202583	-0.0113149	0.00667321	-0.0117522	-0.00168807	-0.00182538	-0.00450818	-0.00195604	-0.00205191	0.00247752	0.00013775	0.000328011	-0.000250187	0.000391462	-2.03824e-05	0.000253143	5.03695e-05	-0.000378762	0.000169251	0.00020464	-0.000142893	3.2461e-05	-3.97076e-05	-1.31817e-05
MR1017_TraceCoords	G31	-0.012119	-0.00503595	0.0135337	-0.00185719	-0.0022412	-0.00431667	0.0121155	0.00418178	-0.00150114	-0.000539092	0.000704542	0.00180624	-0.00166145	0.000416275	-0.000866981	-4.96656e-05	-1.46604e-05	-0.000402388	-0.000206199	-0.000219893	-3.82945e-05	0.000169628	4.13633e-05	-7.2102e-06
MR1020_TraceCoords	G31	-0.0734346	0.000202392	-0.00555441	-0.00292246	-0.00205219	0.00826831	-0.00265339	1.0375e-05	0.000629406	0.00112	-0.00185628	0.000192815	-0.0015249	0.000648149	0.000166947	7.36874e-05	-0.000628648	2.94824e-05	-0.000159534	-5.20682e-05	-3.03234e-05	0.00033737	0.000118639	1.26405e-05
MR1022_TraceCoords	G31	0.067946	0.0115501	0.00239908	0.0101356	0.000482016	0.004017	-0.00246597	-0.00282235	0.00328891	0.00169025	-0.00194248	0.000458053	0.00410881	-0.00127785	0.000648972	-0.000578731	-0.000319521	-0.0010554	4.79409e-07	-0.000436204	-0.00025306	0.000953071	-0.000259278	-1.13814e-05
MR1024_TraceCoords	G31	0.0144864	0.0211817	0.000575687	0.00292937	-0.00439318	-0.00256165	-0.00695929	0.000688004	-0.00386677	0.000931153	-0.00127697	0.000479731	0.000887169	-0.000539522	0.000384039	0.000253297	6.06267e-05	-8.9293e-05	0.000119434	8.70987e-05	-1.51113e-05	7.65634e-05	2.60603e-05	-9.75804e-07
MR1028_TraceCoords	G31	0.0180833	0.0126068	-0.00341716	0.00215578	-0.00664254	-0.00175861	0.00359307	-0.000472812	6.10132e-06	-0.00115812	-0.000314663	-7.78573e-05	-0.000885809	-0.000281913	0.000270011	-0.000142795	-0.000952396	-0.000187585	4.54199e-05	7.93644e-05	-0.000166522	7.5454e-05	-4.12627e-05	4.76574e-06
MR1031_TraceCoords	G31	-0.0604296	0.000372654	0.0010872	-0.00295903	-0.00164855	-0.000787	-0.00122498	0.000541625	-0.00226836	0.00133546	0.000356111	-0.000927702	-0.00190755	0.00041035	-0.000621101	-0.000171774	-0.000170445	-0.000487018	0.000279609	9.76417e-06	9.01019e-06	0.000171567	7.07709e-05	3.22193e-06
MR1032_TraceCoords	G31	-0.039424	0.0152137	0.0138707	0.0188584	-0.00186207	0.00533659	0.00565287	0.00266812	0.00261918	0.000111278	0.00117628	-0.000785665	-0.000171216	-0.000644692	0.000546573	0.000909786	-0.000133646	4.09837e-05	-0.000523782	-0.000245435	2.40182e-05	0.000157084	0.000236108	7.01652e-07
MR1033_TraceCoords	G31	0.03506	0.0213605	-0.0033984	0.00841538	-0.00469201	-0.00106093	-0.00518681	0.00118837	0.000999153	0.00125414	-0.00190479	0.00271837	-0.00133809	-0.000223342	0.000298073	0.000870748	0.000534958	-0.000606623	-0.000133793	0.000537544	-0.000160055	6.71884e-05	-0.000182401	1.40841e-05
MR1037_TraceCoords	G31	0.0740186	-0.00784443	0.00255996	-0.00319779	0.00249268	-0.000412248	-0.00262009	0.00109846	0.00265978	-0.000823694	-0.00081884	-0.00154287	0.00146889	-0.00132512	0.0015165	0.000661771	8.43089e-05	-0.000179889	0.000256029	0.000273274	0.000174594	4.94173e-05	9.47668e-05	2.1256e-06
MR1038_TraceCoords	G31	0.0483892	0.0158632	0.00170147	0.00240289	-0.00163822	0.00158589	-0.00732159	6.97227e-05	-0.00173118	-0.000356287	-0.000737684	0.000202767	0.000870931	-0.00042337	-0.000229902	-0.000531702	0.000511849	-0.00052943	-9.248e-05	-0.000136934	6.85004e-05	6.90006e-05	-0.000191137	-5.6872e-06
MR1041_TraceCoords	G31	-0.0058764	0.00158321	0.00886303	-0.00317097	-0.00308795	-0.000853109	-0.000339496	0.000198248	-0.00298635	-0.00167195	-0.0014853	6.3591e-05	0.000316755	-0.000464172	0.000318814	8.72559e-05	-0.000254174	-0.000202494	0.000366957	-3.51699e-05	-4.63803e-06	-9.81868e-05	1.97314e-05	1.2904e-05
MR1047_TraceCoords	G31	-0.0437443	0.0171513	0.00448188	-0.00483075	-0.00231741	-0.00566675	0.00938301	-0.00117202	-0.000386623	0.00049929	-0.0019836	0.00208246	0.000227906	0.000116619	0.000107365	0.000202358	-0.000541885	-0.00058718	0.000321494	0.000206125	-0.000112089	-0.000101819	0.000134267	-1.4346e-05
MR1049_TraceCoords	G31	0.0446831	0.0140602	-0.0028665	0.00563998	-0.00369176	-0.00244551	-0.00560113	-0.000338142	0.00206943	-0.00215516	0.000582477	-0.00041911	0.000164999	-4.77963e-05	-0.000442736	-0.000308573	9.0524e-05	-0.000517651	0.000205297	0.000435451	-8.13785e-05	8.94053e-05	3.93596e-05	-9.41509e-06
MR1051_TraceCoords	G31	-0.0601761	0.0403845	0.00801769	-0.00500476	0.0027216	-0.00360635	-0.00226724	-0.00477635	0.00133565	0.000755467	0.00056361	-0.00223345	0.000994849	0.00120572	-0.00117191	0.000983079	0.00039035	-0.000106184	0.000465231	-0.000284194	-3.73045e-05	-0.000364549	-3.04992e-05	1.10992e-05
MR1055_TraceCoords	G31	0.00283856	-0.00752233	0.000217323	0.00374827	-0.00615132	4.00288e-05	-0.000806302	-0.000278725	0.00467607	-0.000964394	-0.0022957	0.00113253	-0.000438032	-0.00012887	0.00242124	0.000588095	-0.00054689	0.000230893	0.000112302	-3.72295e-05	0.000364394	-4.61412e-05	4.45056e-05	-1.2032e-05
MR1057_TraceCoords	G31	-0.0221889	-0.0286971	0.00514619	-0.00529071	-0.00271683	-0.00173313	-0.000660664	0.00180203	0.000696304	0.00154561	-0.000698615	0.000478806	-0.000657179	0.00105561	0.000183502	-0.000648823	-0.000125937	4.52109e-05	3.70055e-05	0.000254851	1.62769e-05	-0.00012355	-1.58366e-05	-1.4134e-05
MR1058_TraceCoords	G31	-0.0130613	0.0462956	-0.0018592	0.00348082	-0.00371097	-0.00255186	-0.00655998	-0.00153608	0.00161303	-0.0013959	-3.02412e-05	0.000674346	-0.000942838	0.000834044	-0.00240904	0.000318873	0.00103157	0.000489512	0.000168307	-2.8985e-05	-0.00015179	9.7359e-05	0.000241646	3.82608e-06
MR1059_TraceCoords	G31	0.0782533	0.0200287	-0.00533002	-0.00218208	0.00153244	-0.00264767	-0.00286281	0.00125128	-0.00249078	-0.0013347	0.00147646	0.000762861	0.00121456	-0.00130592	-0.00106502	-0.00012245	0.000167576	7.84934e-05	-3.35441e-05	-2.5838e-05	0.000163198	-9.08368e-05	-7.16077e-05	7.31559e-06
MR1060_TraceCoords	G31	0.0932691	0.0098694	-0.00490901	0.00780355	0.00426585	0.00154811	-0.011249	0.0038088	0.00318548	0.00011698	-0.00259309	0.00121789	0.00184519	0.000778543	-0.000319305	0.00022235	0.000908477	-0.00147359	0.000686679	3.65212e-05	-0.000206071	-4.3119e-06	-0.000527358	8.27067e-06
MR1065_TraceCoords	G31	-0.0550502	-0.00794576	-0.00190987	-0.00117596	-0.00431625	0.00455738	0.0084728	-0.00128183	0.00056348	0.000381529	-0.000594979	0.00077656	-9.12046e-05	7.47511e-05	-0.000238921	0.000325275	0.000224254	-0.000286134	-4.02505e-05	-2.28435e-06	0.000141411	0.000148049	0.000141478	6.19067e-06
MR1066_TraceCoords	G31	-0.239121	0.0492339	-0.0190368	-0.0135509	0.0629736	0.00487459	0.00915253	-0.000886162	-0.000919589	-0.0020508	-0.00110735	-0.00692208	-0.00222282	0.00417057	0.000256918	-0.00240512	0.00141694	-0.00103651	0.00153501	0.000222603	3.62528e-05	0.00121767	0.000199907	-1.97789e-05
MR1069_TraceCoords	G31	-0.139897	0.00215259	-0.0048537	-0.00182173	0.0160622	-0.00610453	-0.00405891	-0.00105975	-0.00301469	0.000450994	-0.0021138	0.00165759	0.0020787	-0.000492592	0.000965899	-0.00153189	0.00115068	0.000440889	0.000198267	0.000693324	0.000143943	0.000126325	0.000174721	2.1497e-05
MR1071_TraceCoords	G31	-0.112962	0.0227815	-0.00959321	-0.00639461	0.00710984	-0.00676912	0.00355708	-0.004932	-0.00129236	-0.0012184	0.000520672	-0.000623967	-0.00165151	-0.000939394	-0.000954428	0.000134033	0.00122855	-0.000655251	0.000429997	-0.000129911	0.000161126	1.95416e-05	0.000188945	-8.77234e-07
MR1073_TraceCoords	G31	0.0989706	-0.00389937	-0.036283	-0.00201061	-0.00245297	0.000842032	-0.00594628	-0.00196927	0.000311072	-0.000714629	0.00398379	0.00354689	0.000345495	0.00485045	0.000598533	-0.000190833	0.0018467	-0.000123653	-0.000379335	-0.000529199	-8.59941e-05	-0.000138216	0.000238423	9.66032e-06
MR1077_TraceCoords	G31	0.00802687	0.0309157	0.0149018	0.0135475	-0.00145671	0.00889657	-0.00111687	-0.000582122	0.00292932	0.0061844	0.00226771	-0.00213663	0.00228256	0.000706012	-0.00165242	0.000317714	0.000364386	-0.000213237	-1.26474e-05	-0.000941944	-4.80049e-05	-0.00102398	-0.000113795	1.06513e-05
MR1078_TraceCoords	G31	0.00378427	-0.00719278	0.00970184	0.00896831	-0.00364039	-0.00142967	0.0010239	-0.000464096	-0.00504484	-0.000711234	-0.00214337	-0.000893439	0.00046724	-0.000517597	0.000806688	0.000260698	-0.000128873	0.00049672	3.14636e-05	-0.000180622	1.95382e-05	0.000256462	0.000165927	1.39851e-05
MR1079_TraceCoords	G31	-0.031485	-0.00836328	0.00604303	0.00601292	-0.00409349	-0.000450001	0.00370503	-0.000795481	0.000384549	-8.47747e-05	-0.00143527	0.000244911	-0.000942942	-0.000160963	0.000503053	0.000511885	3.90245e-05	0.000113831	-2.66387e-05	-3.50293e-06	8.55148e-05	0.0002121	0.00012475	-2.73902e-06
MR1081_TraceCoords	G31	-0.0929424	-0.0141841	-0.0112261	-0.00696658	0.00134791	0.0105836	-0.0086433	-0.000191915	-0.00320266	-0.00287837	0.0024853	-0.000832087	0.00368939	0.0001436	-0.000116873	-0.000904895	-0.00104429	0.00017519	-0.000354567	0.000222205	0.000650231	-0.000537233	-0.000169527	9.04219e-06
MR1083_TraceCoords	G31	-0.0305939	0.00698563	0.0111692	0.00135613	-0.00249498	0.00269425	0.00456684	0.000299214	9.51273e-05	0.00289773	-0.000317134	-0.000215343	-0.000561975	0.000111409	0.000912688	0.000468866	-0.000434006	8.27953e-05	9.54793e-05	9.77213e-05	5.11937e-05	9.42506e-05	2.61707e-05	-8.45221e-06
MR1084_TraceCoords	G31	0.0640001	0.0193403	-0.00863414	-0.0112943	-0.00165761	-0.000139747	-0.000244856	0.00479709	-0.00148486	0.0041982	0.000509676	-6.7214e-05	-0.00052532	-0.000186732	-0.00156684	-0.000314536	-6.7618e-05	0.000597705	0.000385071	0.000161205	0.000241024	-0.000300918	-5.5477e-05	-1.16139e-05
MR1089_TraceCoords	G31	-0.0575821	-0.0159923	0.0167547	0.0111364	0.00263994	-0.00415887	-0.00271814	0.00161387	0.000854155	0.00139715	0.000841114	0.00100973	0.000854601	-0.000228387	0.000347289	0.000265093	-0.000305482	0.000297975	0.000197162	6.64563e-05	-0.000111834	8.6324e-05	0.000194933	1.47743e-05
MR1092_TraceCoords	G31	-0.042259	-0.010599	0.00607972	0.00325116	-0.00293869	0.00032301	0.00575637	-0.00374449	-0.00749708	0.000374205	2.2214e-06	0.00230719	-0.00136136	0.000807106	-0.000964655	-0.000182373	-0.000183313	-0.000253946	0.000555261	0.000153536	-0.000151066	0.000430678	-0.000214135	-2.20503e-05
MR1093_TraceCoords	G31	0.0535174	-0.0109321	0.0022045	-0.0118808	-0.000384266	-0.00485021	0.00462421	-0.00217793	0.000507744	0.00132271	0.000345024	-8.74816e-05	-0.000325846	-1.84354e-05	0.000766178	0.00115392	-0.000584232	0.000121431	-0.000119724	0.000431324	8.90795e-05	-0.000154626	3.62867e-05	-5.0734e-06
MR1094_TraceCoords	G31	0.0142426	-0.021855	0.0147121	0.000560001	-0.000779775	-0.000144116	0.0013624	0.00116152	0.000256257	0.00108694	-0.000345975	0.000369441	0.000640906	-0.00010407	-0.000406185	-0.000409493	0.000273428	-0.000131843	5.8614e-05	-0.000160895	0.000166835	-4.47873e-05	-9.80108e-06	5.64451e-06
MR1095_TraceCoords	G31	-0.00149207	0.0255346	-0.000666027	0.00656545	-0.00598798	0.00357986	-0.00385521	-0.00296145	0.00243989	0.00126045	-5.14612e-05	-0.000416019	0.00112187	0.000863232	5.1394e-05	-0.000433427	-0.000266798	4.55819e-05	-0.000118694	-6.13977e-05	6.89182e-05	-0.000152063	0.0001082	-6.76727e-07
MR1106_TraceCoords	G31	-0.0220902	-0.0115699	0.00199122	-0.0077977	-0.0055171	0.00818964	0.00596309	-0.00118047	-0.00278918	-0.00132595	9.05546e-05	-0.00136551	-0.00253273	0.00281071	-0.000798645	-0.000284422	-0.00033251	0.000339833	-0.000735603	0.000411398	-5.66518e-05	-0.000195947	6.84976e-05	7.47149e-06
MR1109_TraceCoords	G31	0.00677495	-0.01791	0.0109971	-0.00390655	-0.0024583	0.00822619	-0.000599909	0.000980935	0.0037969	-0.000315258	-0.000293835	0.000554007	-0.000278091	-0.000295272	0.000771135	0.000461114	0.000453107	0.000363401	0.00038768	0.000148793	0.000210608	-0.000151103	8.09768e-05	-9.22289e-06
MR1110_TraceCoords	G31	0.0590992	-0.0111294	-0.000565386	0.018838	-0.00338544	0.00827372	0.00768526	0.00160441	0.00235774	-0.00119573	0.00311199	-0.00170453	-0.00185103	-0.000444682	-9.3158e-05	-0.00105721	0.000108119	-0.000134923	0.000232949	0.000142019	0.000421204	-0.000150332	0.000377024	8.59595e-06
MR1111_TraceCoords	G31	0.0497654	-0.00330093	0.0155768	-0.0147096	0.00452929	-0.00973355	-0.000810539	-0.00145228	0.00639662	-0.000701045	0.000175119	0.000485601	0.00103334	-0.000264799	0.00107797	-3.86329e-05	0.000446858	-0.000600243	-0.000336383	-0.000120902	8.95052e-05	-0.000149324	0.00023862	6.57649e-06
MR1112_TraceCoords	G31	-0.0822254	-0.00573037	-0.00114327	-0.00448698	0.00167075	-0.00503684	-0.000189092	0.00151427	-0.000565631	-0.000926986	-0.00247433	0.00111813	-0.0013602	4.31922e-05	-0.000414015	-0.000593804	-0.000152802	-0.000305772	-0.000233251	-7.9763e-05	-0.000158097	0.000186788	5.52305e-05	-6.78812e-06
MR1114_TraceCoords	G31	0.0175196	0.0401981	-0.00892081	0.00136548	-0.00592192	-0.00250125	-0.00264469	0.00149921	-0.00299505	-0.000900841	0.000796773	0.00195788	-0.000541872	0.000975118	0.000647769	-0.000100157	-2.64531e-05	0.00043264	8.69171e-05	-3.85035e-05	-8.44996e-05	8.56766e-05	-3.09167e-05	1.16745e-06
MR1115_TraceCoords	G31	-0.0974176	-0.0195195	0.00316402	0.0113054	0.00573574	-0.00316043	0.000703733	0.0069833	-0.0058361	0.00686535	0.00535623	-0.000590679	0.000407746	-0.00174934	0.00164676	0.000353621	0.000647502	9.11343e-06	0.000726636	0.00101687	-0.000719443	0.000110833	-0.00038677	8.53591e-06
MR1121A_TraceCoords	G31	0.00826217	0.00535093	0.0089409	-0.00928236	-0.00170608	-0.00933428	0.000582294	0.000487628	-0.00139611	0.00424626	-0.00070666	-0.000886797	-0.000310547	-9.64285e-05	-0.000630816	0.000269781	-0.000765848	-0.00055053	-0.000346636	5.69621e-05	8.56395e-05	-0.000106226	0.000115777	-3.79733e-06
MR1122_TraceCoords	G31	-0.0334071	0.0208358	-0.0109693	0.00342488	-0.00750886	-0.00619637	0.00240285	0.00569859	0.0012923	-0.00593271	0.000198452	0.00172853	0.0011336	0.000374206	0.00130261	-0.000145112	0.000697867	-0.000577883	-0.000610921	-0.000298834	0.000307032	-0.00033562	-7.75475e-05	5.76813e-05
MR1123_TraceCoords	G31	0.0538898	-0.0114145	-0.00473711	0.0289532	-0.0051648	0.000801604	0.00866622	0.00122464	0.000152012	0.00540142	-0.00155756	-0.00154731	0.00168856	-1.17342e-05	0.000703524	-0.00106242	4.07774e-05	-3.55156e-05	0.000561172	-0.00030686	0.00112157	0.000562771	0.000288032	2.03774e-05
MR1125_TraceCoords	G31	-0.0174118	0.0428015	0.00592253	0.00678184	-0.00221557	0.00291821	-0.00758261	0.00324851	-0.00308033	-0.00535393	0.00190291	-0.00147073	0.00309096	0.000367783	-0.00129594	0.000360138	0.00107082	0.000980718	-0.000368692	0.000591273	0.000666322	0.000498868	-0.000795665	-8.23835e-07
MR1128_TraceCoords	G31	-0.0415292	0.0350642	0.00912534	0.00393924	-0.000588987	-0.00118878	-0.00126155	-0.00019728	0.00432769	0.00124092	-0.00481132	-0.0002948	0.00125174	0.000750495	0.000206382	0.0011503	-0.000548816	0.00105427	0.000146303	0.000299124	-0.000452166	-0.000352789	0.00054076	-7.76837e-06
MR1130_TraceCoords	G31	0.0310782	-0.0100192	0.0247442	-0.00357538	0.00391991	-0.000649036	-0.000461433	0.00424411	-0.00234981	0.0026597	0.00441977	-0.000546032	-0.00263616	-0.00027333	-0.0011222	-0.0003131	-7.04079e-05	0.000342691	0.000490661	0.000188365	0.000108074	-4.59854e-05	1.52972e-05	7.16991e-07
MR1131B_TraceCoords	G31	-0.087063	-0.0187907	-0.0137911	-0.00317884	-0.00149752	0.00897171	-0.00125134	9.07882e-05	-0.00223131	-0.00235788	-0.000542803	-0.000868478	0.00211752	0.000506231	-0.000812489	-0.000230499	-0.000431792	0.000211917	-0.000171384	0.000182478	0.00019723	0.000196261	0.000198837	1.67399e-05
MR1133_TraceCoords	G31	-0.130603	-0.000468583	-0.0138735	-0.00270195	0.00977228	-0.00146845	0.00158501	0.00523486	-0.00207863	0.000141671	0.00197561	-0.00275197	0.000114807	-0.000974751	-0.000746719	-0.00144882	0.000440183	-0.000538734	-0.000668988	0.000223298	-0.000279009	0.000198105	0.000230439	1.57548e-05
MR1136_TraceCoords	G31	-0.0234435	0.0214594	0.0119205	-0.007595	-0.00106777	0.00507835	0.000272617	0.00819047	-0.00325953	0.00180491	-0.00104196	-0.00228525	0.000825451	-0.00110903	-0.000115211	-0.000564119	-4.73097e-05	-5.64159e-05	-0.000188737	-0.000649217	-2.25562e-05	0.000120403	-0.000155525	2.80627e-05
MR1138_TraceCoords	G31	-0.0282057	0.0112808	0.018591	-0.0111696	0.00176337	0.0045989	-0.00612865	0.00339244	-0.000844691	0.00181902	-0.0016715	-9.2496e-05	0.00110571	-0.000326433	-0.00152318	-0.000228364	-0.00030099	7.19494e-05	0.000621977	6.5866e-07	-0.000556591	0.000245505	6.21361e-05	-1.31377e-05
MR1139_TraceCoords	G31	-0.0523431	0.00823637	-0.00248091	-0.00450843	-0.00325765	-0.00609364	0.00170143	-0.00253486	-3.73265e-05	-0.000398189	-0.00193444	-0.000233978	0.000273638	-0.00076123	0.00100486	0.00015872	0.000133814	-2.99748e-05	0.000328024	0.000101451	0.000131173	-0.000158979	3.01774e-05	-1.39495e-05
MR1140_TraceCoords	G31	0.0976434	-0.00184902	-0.00578597	0.0106957	0.00415595	0.00400343	-0.00602675	0.00155475	0.0025374	0.000500442	-0.00141538	0.000514751	8.2706e-06	0.000637755	0.000868453	-0.000512454	0.00123136	-0.00100256	0.000509759	0.00030747	0.000245584	1.43316e-05	-0.000172598	1.24019e-05
MR1142_TraceCoords	G31	-0.0302228	0.0231844	0.00162326	-0.0191176	-0.00254023	0.0135323	-0.00289662	0.000130469	-0.00329452	-0.000579535	-0.00293749	-4.17509e-05	0.000622916	1.93014e-05	0.00137882	-0.000674982	-0.000335647	-0.000730097	0.000250505	-0.000108898	-3.53833e-05	0.000283082	0.000181246	-7.14159e-06
MR1143_TraceCoords	G31	-0.0352892	0.023647	0.00863845	0.00552426	-0.00264404	0.00679858	0.00120354	-0.00051211	0.00215107	-0.00168218	0.00222701	-0.000967544	0.000484741	0.000197332	0.001668	4.90996e-05	-0.000288808	0.000448008	0.000387332	-0.000188175	0.000172295	-0.000180046	0.000286875	-1.7939e-05
MR1145_TraceCoords	G31	-0.0698581	0.0202818	0.0112609	0.0103508	0.00192839	0.00415351	0.00178583	-0.00399154	0.00131998	0.000506551	0.0024724	-0.000986596	-0.00199511	0.000756161	6.9191e-06	0.00166087	4.26807e-05	-0.000454861	2.61546e-05	-0.000201164	-0.000426708	-0.000210003	-0.000316304	1.0458e-05
MR1146_TraceCoords	G31	-0.00216814	0.015076	0.0169076	0.0153684	-0.00108753	-0.00107811	-0.00524185	-0.000623096	0.000760654	0.000866257	-0.0033164	-0.000787574	-0.00150179	0.000423051	0.000490506	0.000897267	-0.000213038	0.000723073	-0.000398474	0.000474987	-0.00015707	-0.000144799	0.000278443	-1.30255e-06
MR1147_TraceCoords	G31	-0.0160061	0.0323766	0.0112585	0.00578465	-0.000779239	-0.00328413	-0.00844027	-0.00270905	-0.00109888	-0.000662882	-0.00160763	-0.000206265	0.00101877	7.27571e-05	-0.000331892	0.00104468	-0.000300517	0.000483266	-0.000199236	0.000171714	7.12906e-05	-0.000164385	3.79657e-05	-5.59213e-06
MR1148_TraceCoords	G31	-0.0402379	-0.0105795	-0.000321678	0.00219204	-0.00507338	-0.00101804	0.00669025	0.00545521	0.00341622	0.000352659	-0.00077138	0.000326741	0.00131508	-0.000587096	0.000622399	1.75016e-05	-7.10269e-05	-0.000410286	-0.000662419	-0.000202746	0.000167048	-0.000180419	6.46848e-05	1.41943e-07
MR1149_TraceCoords	G31	-0.0123223	-0.00433205	-0.00415301	-0.00888042	-0.00761369	0.0128413	0.00426004	-0.00348791	-0.00261543	0.000531337	-0.00188705	0.000162711	0.00101923	0.00130901	-0.000268642	-3.21752e-05	-0.000191327	0.000557538	-0.00038929	0.000516919	0.000280173	3.63288e-05	-0.000160849	-9.50857e-06
MR1150_TraceCoords	G31	-0.0857482	0.0260141	-0.000881924	-0.00416352	0.00257421	-0.00062286	0.002883	0.000895494	0.00146258	-0.000753695	-0.000699529	-0.0003737	0.000860929	-0.000517574	-0.000247632	0.000535601	-0.000277955	-0.000287809	2.1366e-06	-0.000292727	0.00027208	-6.43638e-05	8.2572e-05	5.03496e-06
MR1152_TraceCoords	G31	0.152657	-0.0115091	-0.0251193	0.00143172	0.0159902	0.00191493	0.00246956	-0.000724925	-0.00154655	0.00301128	-0.000498268	0.00179175	-0.000659866	0.00364291	-0.000682819	0.00087556	0.000748128	0.000480798	-0.000469061	-0.000179504	0.000322977	0.000369242	-0.000344283	1.75177e-05
MR1153_TraceCoords	G31	-0.00363513	0.0615483	0.0041245	0.0100467	-0.000887684	0.000180708	-0.00523763	-0.000772337	-0.00196632	0.00120214	-0.00169552	0.00172569	-0.00011627	0.00339904	7.63628e-05	0.000152701	0.000598213	0.00150814	-0.000528106	0.000427843	-0.00063263	-3.8609e-05	0.000502274	-2.31591e-06
MR1154_TraceCoords	G31	-0.0167475	0.000391587	0.0109202	-0.00290815	-0.00199923	-0.00240758	-0.0029868	0.00216802	0.000581719	-0.000533157	-0.00165154	-0.00039223	0.000420071	-0.000995997	-0.000112899	-1.70318e-05	0.000327103	-0.000195796	0.000233323	-0.000214807	0.000130278	0.000203702	8.47735e-05	1.46672e-05
MR1155_TraceCoords	G31	-0.0310328	0.0103451	0.000403189	0.0105657	-0.0056911	-0.00581433	0.00677327	0.00140436	0.0023512	0.000698642	0.00045582	-0.000550841	0.00213255	-0.00141333	0.00174877	0.000736553	-0.000180546	0.000186344	4.71925e-05	0.000163472	-0.000191998	-6.67311e-05	-0.000156842	7.16791e-06
MR1156_TraceCoords	G31	0.0103043	0.00266597	0.00905068	0.00407728	-0.00401174	0.0011088	0.00618462	-0.000114064	-0.000666526	-0.000938949	-0.00194743	-6.46307e-06	-0.000435514	-0.000266293	0.000255487	-9.10105e-05	-0.000526108	0.00029303	-0.000194969	-6.23983e-05	0.000193759	-0.000227672	-1.61772e-05	-6.96512e-06
MR1157_TraceCoords	G31	-0.0380701	-0.00788145	0.0135475	-0.000691099	-0.000393738	0.00036676	-0.000801052	0.00321141	0.00160417	-0.00290956	-0.00416382	0.00216012	0.00370807	-8.10501e-06	0.000344274	-0.000619798	0.000516753	-0.000310244	-0.000651626	-0.000604986	0.000491346	-0.000191942	0.000125123	1.75669e-05
MR1160_TraceCoords	G31	-0.00154948	0.00741255	-0.00163873	0.0134858	-0.00751827	0.00333567	-0.000148473	0.000439123	0.00309745	0.000436114	0.000639343	5.38549e-05	-0.000633164	-0.000195245	-0.00072074	0.000697056	0.000204311	-0.00091785	0.00022966	-0.000104944	0.000140614	-0.000186446	-0.000134199	1.0801e-05
MR1162_TraceCoords	G31	0.0744209	0.000143531	-0.00559275	0.00762835	-0.00113507	0.00309433	0.00138314	-0.000345087	-0.000604774	0.00203026	0.00111947	-0.000163912	0.000345565	-0.000673091	0.00174499	-0.000176205	0.00067539	-0.000191582	0.000264835	0.000301203	0.000304858	0.000183386	0.0001128	6.54995e-06
MR1164_TraceCoords	G31	0.015782	-0.0140483	0.0246308	-0.00190016	0.00182745	0.0041699	0.00772805	0.0035129	0.00306996	0.000535672	-0.0013007	0.00127679	0.000452067	-1.73086e-06	0.000186869	-0.000968367	0.000678166	0.000315101	-0.00015851	-0.000418432	0.000147786	-0.000196001	4.64625e-05	6.95521e-06
MR1169_TraceCoords	G31	-0.0578716	-0.00688701	-0.00487595	0.000427924	-0.00382058	-0.00709651	0.0039896	0.00346898	0.00117098	0.00215513	0.00143761	-0.00142052	-0.00116987	-0.000338108	-0.000807881	0.000353839	0.000389556	-0.000663272	-0.000320922	0.000247755	-0.000329459	-2.47597e-05	8.41269e-05	-2.31367e-06
MR1171_TraceCoords	G31	0.115877	0.000227953	0.0103933	0.000452336	0.0145804	0.00499293	-0.00208868	-0.0014496	-0.000382589	-0.000880594	0.000861582	-0.000985902	-0.00124589	-0.000396705	-3.20007e-05	-0.00141558	0.00117909	-0.000605722	-0.000865797	0.000273358	-0.000172351	-0.000168477	-0.000261522	-2.00007e-05
MR1172_TraceCoords	G31	-0.0559965	-0.0111779	0.00130931	-0.00294571	-0.00176045	-0.00341965	0.000340099	-0.00158917	-0.00427171	0.00172197	-0.000573745	0.00111242	-0.00312545	0.000332657	-0.000731573	-8.18054e-05	0.000142397	-0.000640789	-6.40577e-05	0.000251432	1.856e-05	-5.63153e-05	-0.000163085	3.0928e-06
MR1174_TraceCoords	G31	0.0784069	0.0153022	0.00125555	-0.00576675	0.00382763	-0.00131441	-0.00488351	0.00030612	-0.0029131	0.00169391	0.000380774	0.00205142	0.000306248	-0.000501995	-0.000661908	-4.09266e-05	0.000743675	-0.000752546	-0.000970459	-0.000689492	0.000436385	-0.000152624	-0.000232958	-3.39246e-05
MR1175_TraceCoords	G31	-0.0756761	0.00630764	0.00235624	0.0038722	0.000627089	-0.00357459	0.00179773	0.00206838	-0.00299202	-0.00291488	-3.98083e-05	-8.74331e-05	-0.00184288	2.54586e-05	0.000304352	0.000737713	-2.02475e-05	-0.000588686	-0.000287314	3.79552e-06	2.44545e-05	0.000263308	-0.000108855	3.22273e-05
MR1176_TraceCoords	G31	-0.1131	0.0189443	-0.00263293	-0.00229009	0.00774514	-0.00412714	0.00866219	-0.000535367	0.000922955	-0.00193119	-0.00291139	0.000888379	-5.2138e-05	0.00152743	0.000411701	0.000192002	0.000185683	-0.000750555	-0.000244024	1.79652e-05	-0.000179406	-0.000428408	8.18081e-05	-1.32101e-05
MR1177_TraceCoords	G31	-0.033326	0.0243059	0.0012842	-0.00235599	-0.00454428	0.0026627	0.0068473	0.000214081	0.00132175	-0.00340965	0.000931861	-0.000923674	-0.000322464	0.000120036	0.000489423	3.86033e-05	-0.000604095	-0.000365965	0.000258384	-0.000214614	-0.000188861	0.000317508	-0.000155095	1.00494e-06
MR1178_TraceCoords	G31	-0.00598931	-0.013764	0.0139364	-0.00874021	-0.000374859	0.000172762	-0.00616238	0.00384651	-0.000700413	0.000913526	0.000787264	-0.000528573	0.00276954	-0.000555001	-0.000108876	3.81708e-05	-0.000214605	-2.86277e-06	0.000406422	-0.000190412	-0.000135862	-8.08386e-06	9.23918e-05	1.8391e-05
MR1179_TraceCoords	G31	-0.0182921	0.0226499	-0.0214541	-3.04786e-05	-0.0106557	-0.00507656	0.00313966	0.00301489	-0.0020456	-0.00311229	5.80363e-05	0.0004485	0.000343954	-0.000908142	0.00192521	0.000431546	-0.000269492	-0.00014934	0.000736695	0.000166074	2.36747e-05	-0.000116817	-2.48152e-05	5.04432e-06
MR1180_TraceCoords	G31	-0.11418	-0.0115568	-0.0122386	0.00670969	0.00451819	0.00952652	-0.000382405	0.00239444	0.00392959	-0.000280952	0.000289644	0.000697069	0.000860763	-0.00145559	-0.000399476	0.00109633	-0.000903821	-0.000924181	-0.000984672	7.99606e-05	0.000212467	-0.000152292	0.000218415	1.07782e-05
MR1184_TraceCoords	G31	0.0608949	0.00012756	0.00212369	-0.00423708	-0.000198335	-0.00275656	0.00429186	-0.00351282	-0.00116719	0.000539328	0.000497098	-0.000752793	-0.00188324	-0.000704106	-0.000101602	-0.000446102	-0.000626562	0.000371877	-0.000430119	-0.000380199	7.80295e-05	-6.2832e-05	-2.28775e-05	-8.17969e-06
MR1185_TraceCoords	G31	0.101103	0.0117533	-0.0107616	0.00103868	0.00417371	0.000181545	-0.00160066	0.00158465	-9.69279e-05	0.00187572	0.00211272	0.000995813	0.000334721	-8.72639e-05	-0.000388818	-0.000366438	0.000732212	0.00013021	0.000278454	-0.000228016	0.000538054	0.000419794	0.000317017	-5.43413e-06
MR1186_TraceCoords	G31	-0.011661	-0.00922522	-0.00596836	-0.00431898	-0.00777463	0.00676634	-0.000805947	-0.0019052	0.00244387	-0.00189578	-0.00141386	-0.000101524	0.00108876	0.000291423	0.00120686	0.00028633	-4.98729e-05	0.000260341	9.69813e-05	0.00010422	-6.1376e-05	0.000134058	-6.45224e-05	2.84335e-06
MR1189_TraceCoords	G31	-0.0112839	0.0380633	0.0108656	0.0120485	-0.00116899	-0.00304353	-0.007615	-0.00232812	0.00109784	0.00190418	-0.000762761	-0.00165967	1.1228e-05	0.00112537	-7.94412e-05	0.000548208	4.17205e-05	0.00138869	-0.00057736	0.000146953	-0.000185092	-1.19712e-05	0.000267196	-1.45662e-05
MR1190_TraceCoords	G31	-0.0636548	-0.0104677	-0.0152301	-0.000659286	-0.00551786	-0.00177923	-0.00252768	-0.00420399	0.00464571	-0.00228797	0.000975462	-0.000422949	-0.000292285	-0.000614174	0.000693923	-0.000281782	1.40046e-05	0.000632264	-0.000353867	-0.000482919	-3.45342e-05	0.000137692	-0.000195065	-4.81281e-06
MR1191_TraceCoords	G31	-0.0321117	-0.03213	0.00933527	0.00301061	-0.00132939	-0.00390057	0.00221764	0.000947516	0.00199808	0.00205204	-0.000206772	0.00103959	0.00343695	-4.9725e-05	0.000167874	-0.000177525	0.000932933	0.000260185	-8.78825e-05	-9.6567e-05	0.000368757	6.42963e-05	0.000124595	-4.70821e-06
MR1192_TraceCoords	G31	0.0669107	0.000743864	0.0152242	-0.0094819	0.00522031	-0.00508176	0.00961157	-0.00164953	0.0005659	0.000771155	0.000570302	0.000778453	-0.000489053	-0.000572163	-0.00160413	0.000131956	-0.00166118	0.000394879	-0.000205032	0.000103998	-5.5571e-05	-0.000198008	-2.41506e-05	3.84081e-06
MR1195_TraceCoords	G31	0.0169286	0.00122181	0.0115375	-0.00702909	-0.00203304	0.0126898	-0.000683912	-7.03207e-05	0.00124723	-0.00107135	0.000763756	0.000381829	-0.00107238	-0.00086475	0.000494997	0.00048357	0.000534963	-0.000146497	0.000165141	0.000176152	-1.82752e-05	1.89862e-05	-5.47453e-05	6.77915e-06
MR1201_TraceCoords	G31	-0.0365823	-0.0145461	0.0133202	0.0121463	-0.00137319	0.00582713	-0.00237486	-0.00138756	-0.00187335	8.50724e-05	0.000642831	0.000764881	6.49404e-06	-0.00014115	0.000266921	0.000495321	-0.000493341	1.17987e-05	0.000352238	-9.74811e-06	0.00022407	-1.14784e-05	-4.24029e-05	2.01487e-06
MR1202_TraceCoords	G31	0.0273228	0.0313643	0.00879601	0.00333371	-0.00103736	-0.00272698	-0.00249466	0.00243438	-0.000991566	0.000619692	0.000782745	-0.00127028	0.000590151	-0.000568119	-0.000319477	1.72516e-05	-0.0003536	0.000563692	-0.000129593	0.000291308	-0.000212024	0.00033769	2.33443e-05	-1.21742e-05
MR1204_TraceCoords	G31	0.0215711	0.0195446	0.00499553	0.0157905	-0.00452417	0.00444729	0.00119611	0.000111315	-0.00244569	-0.00250638	0.000714208	6.41585e-05	-0.00166	0.000383349	0.000628512	-0.00199925	0.000200054	-0.000326883	-0.00104925	0.000400811	-9.78814e-05	-4.54926e-05	-0.000261214	-9.82979e-07
MR1207_TraceCoords	G31	0.0861926	0.00224803	-0.00836002	0.00125345	0.000658451	0.00423866	0.00111184	0.00283284	-0.00170477	-0.00177516	0.00234459	0.000866747	0.00030108	4.31903e-05	0.000508676	-0.000308136	0.000193184	0.00042536	0.000449982	-8.35453e-05	-6.32948e-06	-0.000143711	0.000279235	-2.46826e-06
MR1208_TraceCoords	G31	-0.0788999	0.0356299	-0.00158404	0.0101654	0.00142954	0.00121846	-0.00702259	0.00231841	-0.00183392	-0.0024734	-0.000292793	-0.000627472	-0.00151842	-0.000816865	-0.00010527	0.000999003	0.000782128	0.000949072	8.18041e-05	0.000181574	0.000163786	0.000242562	0.000230933	1.20892e-05
MR1210_TraceCoords	G31	-0.051929	-0.014037	-0.00712513	-0.00385021	-0.00485223	0.00615484	-0.00469001	0.00124055	-0.00124717	-0.000966713	0.00177861	-0.000282717	0.000495498	0.000160193	0.000459847	0.000193539	-0.00036167	-0.00013651	0.00013857	0.000211401	0.000194268	-0.000247088	4.291e-05	1.13624e-05
MR1212_TraceCoords	G31	-0.0134992	0.0138161	0.00241525	-0.00452021	-0.00449238	-0.00449436	4.39628e-06	-0.000394108	0.00178212	0.00205784	-0.0001026	-0.00103083	-0.000327941	-0.00045004	-0.000447985	0.00050793	-0.000319005	7.713e-05	0.000124483	-2.30083e-05	-6.89694e-05	-0.000394032	1.26492e-05	-4.67184e-06
MR1213_TraceCoords	G31	-0.000317707	0.00617855	0.00549254	-0.00335253	-0.00452183	0.0046591	0.00195467	-0.00265589	-0.00197519	-2.3897e-05	0.00259803	-0.000577461	-0.00100964	-0.000280602	0.00144099	-2.75255e-06	1.83431e-05	9.17964e-05	0.000371162	3.25916e-05	0.000139742	-9.50332e-05	-5.02273e-05	5.98827e-06
MR1217_TraceCoords	G31	0.0125358	-0.0103662	0.0045838	0.00182692	-0.00462332	-0.00589501	0.00700248	0.000265807	0.001425	-0.00161256	0.00092186	0.000524939	-6.79224e-05	0.00049135	0.00086741	0.00031653	-0.000706467	-0.000134216	5.29821e-05	7.81311e-05	0.000121762	-4.91693e-05	0.000277765	3.31464e-06
MR1220A_TraceCoords	G31	-0.109569	-0.0221529	0.00196013	0.0137756	0.00855364	0.00249737	-0.00773132	0.00794865	-0.00344433	-0.000725455	0.00127791	0.0019793	-8.41278e-05	-0.0011497	0.000650549	0.00143643	-0.00134653	-0.000271851	2.08676e-05	0.000644467	3.68448e-05	1.74828e-05	-0.000190564	9.74431e-06
MR1221_TraceCoords	G31	0.0864867	0.00268112	0.00639421	0.00751421	0.00623311	0.00533134	-0.00801622	0.000248437	0.00328918	-0.00377645	-0.00318166	0.00254449	0.00100995	-0.00405004	-0.000793071	0.000300528	0.00233738	-0.00219781	0.000407318	0.00141167	-0.000786449	-0.00023149	-0.000302792	-1.67145e-05
MR1223_TraceCoords	G31	0.0690373	0.00406422	0.00131513	0.00417433	0.000672204	0.000641497	-0.00264826	-0.00344606	-0.00212597	-0.00143796	0.000384563	0.000150021	-0.00128258	-0.000418262	-0.000882773	-0.00117623	2.54139e-05	-0.000242685	-0.000453857	-0.000177815	-1.68063e-06	-0.000103219	-5.40339e-05	2.44566e-06
MR1224_TraceCoords	G31	0.00832252	0.0222249	0.0017693	0.0104407	-0.00488969	-0.00235068	-0.00628681	-0.002957	0.00424182	0.00207049	-0.000985363	-0.00134756	0.000304213	0.000630194	-0.00220828	-0.000633866	-7.56414e-05	-0.000482365	0.000145055	-2.59174e-05	5.93919e-06	-0.000232694	-0.00010828	3.97145e-06
MR1225_TraceCoords	G31	-0.0239245	-0.00254569	0.0080142	-0.0014918	-0.00299474	-0.00559105	0.00320085	0.00314458	0.00261621	-0.000312564	-0.000518744	0.00151923	5.64197e-05	0.00104662	0.000607657	-0.000624858	0.0010437	-0.000614572	-0.0010598	-0.000627846	0.000353251	-0.000383673	8.34912e-05	3.30664e-05
MR1226_TraceCoords	G31	0.0416227	0.000708199	0.00667612	0.00172305	-0.00189575	-0.00246151	0.00433263	-0.00369609	-0.00262509	0.00146687	-0.00188703	-0.00052874	-0.000175603	-0.000998173	-0.000444404	-0.000903639	-0.000406857	0.00109306	1.85904e-05	0.000377685	-0.000317957	0.000356527	0.000446213	1.16361e-05
MR1227_TraceCoords	G31	0.0414761	0.0167415	-0.000951591	0.0168328	-0.00414955	-0.00513208	-0.000202427	0.00179335	0.00167588	0.00359467	0.00146198	-0.00172596	0.00168093	-0.000213155	-0.00100094	-0.000329457	-0.000621259	-0.000951223	1.3167e-05	0.00022416	0.000501734	0.000115269	-1.82463e-05	-8.36255e-06
MR1228_TraceCoords	G31	0.0301236	0.0229807	0.000719525	0.00374158	-0.00453319	0.00982534	3.268e-06	0.000631211	-0.000306732	-0.00232313	0.000420118	0.00173054	0.000241293	-0.000730032	-0.00189838	-0.00079274	0.000565896	-0.000903407	-0.000449744	-0.0004639	-0.000513022	-0.000104576	-0.000332047	-1.58682e-05
MR1231_TraceCoords	G31	-0.039159	-0.0131801	-0.00795332	-0.00811221	-0.00589829	0.00173183	-0.00324935	-0.00084263	4.40875e-05	-0.000319036	-0.000514254	-0.000823333	-0.000541612	-0.000136498	-0.000833769	-0.000181878	0.000437795	-0.000248572	0.000110202	0.000235827	0.000227827	-0.000121888	0.000133001	1.48095e-06
MR1232_TraceCoords	G31	0.0097419	0.00898157	-0.00261699	0.00123579	-0.00715929	-0.00301653	0.00938769	-0.00180987	0.00112643	-0.00490352	0.000195956	-0.000307769	0.000503702	-0.000614685	-0.000253644	-0.000435461	-0.000891169	0.0004338	0.000167538	0.000298163	-0.000242783	9.58581e-05	-0.000122287	-8.95312e-06
MR1233B_TraceCoords	G31	0.05632	0.012379	0.0130262	0.00388224	0.00261158	0.00551683	-0.00688358	-0.00276815	-0.00164181	0.00188973	-0.00129465	0.000425352	0.000466065	-0.000580622	0.000626582	-2.30976e-05	0.000478635	-0.000181144	-0.000337756	-0.000211339	-6.42323e-05	-0.000101946	-8.36991e-05	-1.27121e-05
MR1235A_TraceCoords	G31	-0.0555007	0.0152334	0.0126836	-0.000247752	0.00105779	0.000216308	0.00158624	-0.00384612	0.000171223	-0.000793035	0.00148693	-0.000386037	-0.00096255	0.000451133	-1.65549e-05	8.2515e-05	0.000157401	-9.22412e-05	0.00015837	-0.000583059	6.46804e-05	-0.000215295	5.80249e-05	1.33628e-05
MR1236_TraceCoords	G31	0.0488134	0.0059425	-0.0012426	0.00854856	-0.00305088	-0.00501628	-0.00305548	-0.00111646	0.00165394	0.0014176	-2.37317e-05	-0.00104431	2.61512e-05	-0.000598906	-0.00144176	-0.00040052	-0.000468515	-0.000698957	7.23142e-05	0.000253222	9.79861e-06	0.000210141	3.60144e-05	7.41884e-06
MR1240_TraceCoords	G31	-0.0420639	-0.0188714	0.00670833	0.000780916	-0.000447303	-0.0109051	-0.00784159	0.000166819	-0.00377029	-0.0005511	0.00331797	0.00069268	-0.00202	0.000611434	-0.00152059	-0.00054682	-0.000270509	4.46489e-05	0.00105182	0.000199532	-0.00035283	0.000269388	-0.000148322	7.6093e-07
MR1242_TraceCoords	G31	-0.0243077	0.0273982	-0.000111016	-0.00429344	-0.00492767	0.00166285	0.00444347	0.00186756	-0.00102569	-0.00320804	0.000135079	-0.000437261	-0.000814628	-8.94817e-05	0.00030383	-0.000279358	-0.000790055	0.00035504	0.000330263	-8.89542e-05	-0.000171473	1.39996e-05	-0.000204442	2.96456e-06
MR1243_TraceCoords	G31	-0.153289	0.0188547	-0.00410902	-0.00235933	0.0203571	0.00506494	-0.00298552	-0.00193676	0.00336353	0.000417924	0.00112633	-0.00131486	6.96812e-05	-5.54709e-05	-0.00251562	-0.000421895	0.000159218	0.000226628	0.000177081	-0.000826979	0.000225147	5.82179e-05	0.00037742	-3.97261e-06
MR1245_TraceCoords	G31	0.0265497	0.00110323	-0.00275969	-0.00330038	-0.00563743	-0.00152095	0.0011413	0.001166	0.00343003	0.000496817	-0.00170206	-0.000725189	0.000249307	-0.00106463	-0.000266779	0.00014418	-0.000182935	0.00020446	0.000408767	1.99949e-05	0.000231163	-0.000186601	-0.000110371	7.71914e-06
MR1246_TraceCoords	G31	-0.121864	0.00116999	-0.000708132	0.00088123	0.0106809	-0.00321238	-0.00171535	0.00187627	0.00305135	-0.00652365	0.000227845	0.00175383	0.000501477	0.00165782	0.000855695	-0.0014654	0.00119637	6.37318e-05	-0.00141151	-0.00100275	0.000970014	0.000327906	0.000159062	1.14502e-05
MR1247_TraceCoords	G31	-0.0390339	-0.0237662	0.00888844	0.0118316	-0.00159289	-0.00133671	-0.00340453	0.00324913	0.000561839	0.00251552	0.00139216	0.000378365	0.00171449	-0.000875614	-0.000189635	0.00093749	-0.000301957	-0.000247208	0.000378121	-4.60036e-05	6.69633e-05	9.50654e-05	0.000296588	2.5418e-06
MR1248_TraceCoords	G31	-0.0261204	0.0190229	0.0103705	-0.00793429	-0.000462032	-0.0123406	-0.000319289	-0.000473593	-0.000932131	-0.00142807	0.000462471	-0.00135558	-0.00109429	0.000447459	-0.000536598	0.00050075	-1.03135e-05	0.000349646	-9.53692e-05	-0.00010113	0.000277825	0.000103543	0.000158855	9.47075e-06
MR1249_TraceCoords	G31	-0.0652192	-0.00618479	0.00893976	-0.00821537	0.00171117	0.00142534	0.00159289	0.00735698	-0.000208178	0.00355598	0.00219499	-0.000403686	-0.00350886	0.000918524	-4.12702e-05	-0.000537722	-0.000231107	-0.00101583	-0.000389725	0.000190656	-0.00050387	0.000302567	-8.49203e-05	-4.82616e-07
MR1251_TraceCoords	G31	0.0910029	0.000531399	-0.00183877	0.00650456	0.00303643	0.0114011	0.00079689	0.00604691	-0.00141044	-0.00103787	-0.000573309	0.000959077	-0.00177701	-0.000743715	0.000602112	-0.000851343	0.0017928	0.00063058	0.0003918	-0.000131904	-2.45344e-05	-0.000278301	-6.6135e-05	9.84596e-06
MR1252_TraceCoords	G31	-0.0477519	0.0472771	-0.00376979	0.00698533	-0.00162079	-0.00828197	-0.0083067	0.00524166	-0.000717768	0.00390765	-0.004415	-0.00211706	-0.000722752	0.000418246	-0.000700746	0.00144998	0.000676644	0.00127398	-0.00036439	0.000629304	-0.000182134	5.724e-05	0.00074361	-9.0287e-06
MR1253_TraceCoords	G31	-0.180831	0.0488072	-0.00945473	0.00865332	0.0320845	0.0146343	-0.0064565	-0.00784282	-6.19937e-05	-0.00149132	0.000872609	-0.000468801	0.0019886	0.00173832	-0.00141441	0.00307444	-0.000206047	0.000435878	0.00195628	-0.00124755	0.00122479	-0.000965964	-0.000230657	7.59053e-06
MR1254_TraceCoords	G31	-0.00817631	0.0209929	-0.00377345	0.00399881	-0.00660321	0.000959847	-0.00372701	-0.00366764	-0.000937355	0.00420701	-0.00337818	0.00134482	0.00106855	2.58906e-05	0.000229854	0.000772951	0.000214546	-0.000328905	2.27175e-05	1.7693e-05	-0.000148954	-0.000199927	4.57907e-05	3.24118e-06
MR1260_TraceCoords	G31	0.0998905	0.0233501	-0.0103562	0.000705268	0.00520603	-0.00180802	-0.00562101	-0.00072419	-0.00119167	-0.0012547	0.000985098	0.00275919	0.000995458	0.000386513	0.00103682	-0.00118793	0.000157002	-0.000341784	-0.000193542	0.000129032	-0.000279931	9.42491e-05	0.00016654	8.74892e-07
MR1261_TraceCoords	G31	0.0994556	-0.0033568	-0.00640318	-0.00117456	0.00444797	0.00441119	0.0033329	-0.00423322	0.000975468	0.000560257	0.00150978	0.00027437	-0.0001587	-0.000359731	-0.000726082	-0.000251868	0.000128515	-0.000123349	-0.000427385	0.000256189	-7.48458e-06	5.5254e-05	0.000213033	2.42146e-05
MR1265_TraceCoords	G31	-0.027196	0.0119711	0.00737117	0.00580552	-0.00402723	-0.00162049	0.0137175	-0.000373188	0.0030699	0.00303909	0.00490193	-0.00215989	0.00260401	-0.000812285	0.00299609	2.10326e-05	-0.000175701	-0.000641811	5.06214e-06	-0.000271426	0.000164859	3.92432e-05	-9.93525e-05	1.06627e-05
MR1266_TraceCoords	G31	-0.0900182	0.0047143	-0.00327805	-0.00435641	0.00154998	0.00609559	0.00347098	0.00591268	0.000218096	-0.000532957	-0.000160536	-0.00113522	0.000174958	-0.000557063	-0.00266729	-0.000572191	0.000443434	-0.000708713	-0.000842262	-0.000166814	0.000428684	3.23328e-05	0.000491182	1.38605e-05
MR1267_TraceCoords	G31	0.00802445	-0.0285947	0.0158397	0.00283153	-0.000196666	-0.00262597	0.00196553	-0.000146406	-0.00262331	0.000787852	0.00110794	0.00206244	-0.000924929	0.000293789	-0.001251	5.10607e-05	0.000574823	-5.82729e-05	0.00110297	0.000194734	-3.80585e-05	0.000262403	0.000223567	-1.55889e-05
MR1268_TraceCoords	G31	-0.0914091	0.0294789	0.00509257	-0.0176166	0.00731815	0.00364101	-0.00287627	0.00384699	0.00300397	0.000613487	-0.0033248	-0.00208125	-0.00149982	0.00128005	0.000689	-0.00163998	-0.0004812	-0.000271055	-3.20344e-05	2.35347e-05	0.00024271	0.000200629	0.000550921	-1.44959e-05
MR1269_TraceCoords	G31	-0.0538482	-0.00925101	-0.00418336	-0.00692813	-0.00383069	-5.97125e-05	0.000501563	-0.00120359	-0.00428504	-0.00446993	0.00134625	-0.001008	-8.58888e-05	0.000757387	-0.000845593	-0.000278567	0.000518909	-0.000117124	0.000107668	-9.87112e-05	0.000236601	0.00046723	-0.000238494	4.19759e-06
MR1271_TraceCoords	G31	0.0989041	0.00413825	-0.00958489	0.0066679	0.00407623	-0.00341524	-0.00609311	-5.06299e-05	0.00146356	0.00147066	0.000567249	-0.000404715	0.00038272	0.00138779	0.00065174	-0.000517106	1.53107e-05	-0.000946595	-1.40201e-05	0.000145779	0.000277321	0.000427714	4.08655e-05	-3.57319e-06
MR1274_TraceCoords	G31	0.0168402	0.000444438	0.000617835	-0.00393356	-0.00390352	-0.00376111	-0.00943684	-0.00330365	-0.000262755	0.000801534	0.00103112	-0.00133842	0.00104782	-0.000881308	-0.0014241	-0.000330292	0.000159761	-0.000733304	4.67843e-05	0.000175853	2.60848e-05	-0.000116292	0.000177449	9.47546e-06
MR1276_TraceCoords	G31	-0.00926934	0.00178655	0.0156254	-0.0013561	-0.000944087	-0.00500781	0.00129923	-0.00151361	0.000405365	-0.0010254	0.000913077	0.0015043	-0.000860056	0.000559028	-0.000514414	0.000245523	-0.000165059	-0.000147726	1.84443e-05	0.000133508	-0.000176247	-0.000107777	1.91088e-05	-1.98276e-05
MR1279_TraceCoords	G31	0.0408008	-0.00560846	-0.000386561	-0.019894	-0.00179338	-0.00919698	0.00876638	0.00455799	-0.00266459	0.00291332	-0.00100274	0.000257114	0.00223588	-0.000986619	-0.0015598	0.000509963	-0.00144745	0.00027864	1.5451e-05	-0.000354505	0.000137667	-0.000108024	2.09962e-05	1.51288e-06
MR1281_TraceCoords	G31	-0.0921192	-0.0106943	-0.016359	0.0001277	-0.00157937	0.000306055	0.00610982	-0.00425293	0.000208744	-0.00231106	5.1009e-05	-0.000222644	0.000810754	-0.000773157	-0.000255058	9.48188e-05	0.00061869	7.62706e-05	-0.000128506	7.582e-06	-1.58206e-05	0.00036888	9.44523e-05	-2.13415e-06
MR1282_TraceCoords	G31	-0.17777	0.00421184	-0.0324173	-0.00495078	0.0245134	-0.00729928	-0.00417454	-0.00162578	-0.00246816	0.000482331	-0.00011547	-0.00249209	-0.00192977	-0.00300525	-0.000341661	-0.00308719	0.0011548	0.000888155	0.00059159	0.000410877	2.12147e-05	-0.000197602	-0.000148798	-2.34701e-05
MR1284_TraceCoords	G31	0.0514677	-0.0374526	0.0054119	0.00410748	0.000617793	-0.00645696	0.0037443	-0.00191007	-0.000490523	-0.00116435	-6.08014e-05	-0.00175882	-0.000239716	0.000785848	-0.00031993	-0.000156674	0.000311969	3.92772e-05	7.83421e-05	-0.000255594	-4.72648e-05	-4.09966e-05	0.000245365	-1.71921e-05
MR1286_TraceCoords	G31	-0.0535457	-0.0136635	-0.0490843	-0.00252619	-0.0125187	-0.0101969	-0.00561018	3.76329e-05	0.00208223	-0.00176864	-1.84776e-05	-0.00398443	-0.0034356	-0.000730068	-0.000303489	-0.00201618	9.07316e-05	0.000283517	-0.000805591	-0.000568871	-0.00104998	-0.000281967	-1.1525e-05	8.61749e-06
MR1289_TraceCoords	G31	-0.051062	0.0274978	0.000349754	-0.00507709	-0.00222805	-0.000167944	0.00412533	-0.00336004	-0.00187603	-0.00242919	0.00164278	-0.00127516	-0.000392105	-0.000498683	0.000463945	-0.000227831	-5.19611e-06	-0.000452705	0.000457037	-0.00034069	-0.000214189	0.000275231	-0.000371244	3.29455e-06
MR1290_TraceCoords	G31	0.18871	-0.00983003	-0.0226377	-0.00507411	0.0336396	0.000109314	0.00156897	-0.000896177	-0.000120298	-0.00226113	0.000629614	0.00239988	-0.00013913	0.00109754	0.000346979	0.00247562	-0.000716297	-0.000825892	-0.000807368	0.000304262	-0.000354978	-0.000203472	0.000369431	-1.36044e-05
MR1292_TraceCoords	G31	0.0145063	-0.0219739	-0.00369454	-0.00967144	-0.00595182	0.00257164	0.00154844	0.00193777	-0.00143037	0.000257297	-0.00117984	-0.00189534	0.00010011	0.000817917	-0.0019033	0.000401986	0.000306771	-4.05638e-05	0.000172698	-0.000117274	-0.000159567	-0.000180867	0.000190126	2.47671e-06
MR1293_TraceCoords	G31	-0.0361125	0.0519277	-0.00309336	0.00983345	-0.00314611	-0.000224685	0.00154007	-0.00847015	-0.0018285	0.00370797	0.000359799	0.00132258	0.00169181	0.000982397	-0.000442006	0.000622654	0.00100179	0.000142235	0.000220067	-0.000123542	-0.00024484	-0.000349439	0.000248381	-9.68661e-06
MR1303_TraceCoords	G31	-0.142024	-0.0058404	-0.0134388	0.00196704	0.0127853	0.00928654	7.03066e-05	-0.0028736	-0.00113244	0.00210852	-0.00285392	0.000454446	0.000287431	-0.00051281	-0.00142137	-0.000597145	-0.000840433	5.98619e-06	-0.000321584	0.000272749	0.000504941	-0.000226539	0.000159099	5.64388e-06
MR1304A_TraceCoords	G31	-0.0791211	0.0121556	-0.0150997	-0.00698002	-0.00235618	-0.00794917	0.00477521	0.0017368	-0.000787679	-0.000921352	-0.00137999	-0.000899788	0.000516906	-0.00154442	-9.02183e-05	0.000225704	0.000365271	-0.000531658	0.000326981	0.000272919	0.000335165	-2.84792e-05	0.000299493	1.52379e-06
MR1304B_TraceCoords	G31	-0.10764	-0.0044892	-0.00214504	0.00879571	0.00557214	-0.00483159	0.00782099	0.000522755	0.00208916	-0.00157744	0.00115974	0.00178983	-0.00381913	8.32497e-05	0.00142168	0.00117781	0.001429	-0.000553707	-0.000650586	-0.000560819	8.83996e-05	9.05976e-05	-0.000121397	3.098e-05
MR1305_TraceCoords	G31	-0.00257483	-0.0328571	-0.00804345	0.0108324	-0.00785145	0.000852933	-0.000684777	0.000622575	-0.0022861	-0.0022915	0.00187193	-0.00229387	0.0014544	-9.72074e-05	0.00160088	0.000930667	0.000394306	0.000243103	0.000242195	-0.000261943	2.57882e-05	-0.000251687	0.000234181	5.06408e-06
MR1306_TraceCoords	G31	0.00235113	-0.0173019	0.000884707	-0.0140904	-0.00520472	0.00553662	0.00541919	-0.00127911	-0.00186802	-0.000495671	-0.00190717	-0.000617152	0.002343	0.00135619	-0.000666482	0.000109177	0.000503891	0.000193318	-0.000177324	3.20483e-05	2.24046e-05	0.000151702	-0.000241033	-4.96954e-08
MR1307_TraceCoords	G31	-0.184321	-0.0118264	-0.0225272	0.016005	0.0274108	0.00236199	0.00268607	-0.000693478	-0.00207668	8.3117e-05	-0.000997125	0.00185267	-0.000449881	-0.00331464	0.00219215	0.00107904	0.000105743	0.000108902	-0.000384689	0.00046887	0.000270532	-0.00016276	-0.000214172	5.25473e-07
MR1309_TraceCoords	G31	-0.00326613	-0.0136686	-0.00513413	-0.00237745	-0.00702626	-0.00322571	-0.000113364	-0.0003208	0.00245546	-8.71921e-05	-0.00149942	-0.00066981	0.00176338	-0.000725426	0.000211331	0.000221306	1.96265e-05	9.22026e-05	-0.000199729	0.00012283	0.000293057	-0.000240406	-1.66053e-05	2.80515e-06
MR1310_TraceCoords	G31	0.0976841	0.00428646	0.017159	-0.000160874	0.0130684	0.000667984	-0.00529114	-0.00658882	-0.00346916	-0.00169861	0.002733	-0.000951289	0.00123203	-0.00260228	0.000236195	-0.000561536	-0.0002898	-0.00167723	-0.00127256	0.00102994	-0.00087666	0.000651935	0.000469902	2.75809e-06
MR1311_TraceCoords	G31	-0.0265557	0.00575131	-0.00233458	-0.00986448	-0.00598991	0.00882877	0.00348112	-0.00616269	0.000528187	-0.00248901	-0.000724901	0.000496728	0.000528414	0.000636829	0.00188876	-0.000202367	-0.000130502	-8.94014e-05	0.000321948	0.000178869	0.000183037	0.00024423	-0.000230766	-2.59926e-05
MR1313_TraceCoords	G31	-0.00371517	-0.00300286	0.00554847	-0.000575398	-0.00581648	0.0133859	0.0104007	-0.00521176	0.0042656	-0.000949421	0.00181946	-0.000306167	-0.00405204	0.00145581	0.000538671	-0.000206316	0.000118543	-6.8524e-05	-0.000352031	0.000444143	0.000413919	0.000466618	-0.000249025	-1.35886e-05
MR1317_TraceCoords	G31	-0.110021	0.0122603	-0.0280717	-0.0148441	0.00147736	0.00694889	0.000106463	-0.00239348	0.00222064	0.00260344	-0.00323677	-0.00226757	0.000727096	-0.000408738	-0.00125322	-0.00254411	7.12664e-05	-9.90476e-05	-0.000581256	0.000663637	0.000525654	-0.000502255	8.77053e-05	8.47982e-06
MR1318_TraceCoords	G31	0.0729541	0.020861	0.00231093	0.00527243	0.00252401	-0.00172997	-0.00539336	-0.00194234	-0.00223305	0.00388001	0.000317566	0.000644659	-0.00108406	0.000750136	0.00155097	-0.00065157	-0.000217189	-0.000132649	-0.00073101	-0.000236579	0.000234722	0.00023347	0.000165622	5.97842e-06
MR1320_TraceCoords	G31	-0.0115595	0.00767733	0.0169102	-0.0108325	-0.000107098	0.00316453	0.00441694	0.00265695	-0.00522167	0.00533031	-0.000689274	-0.000795635	-0.000433704	-0.000323304	0.000315861	-0.000805803	-0.000216809	0.00011284	-0.000227094	-0.000406447	0.000104623	-0.000212245	-0.000141736	1.86379e-05
MR1321_TraceCoords	G31	0.010355	-0.00902006	0.00885494	-0.00580176	-0.00315774	0.00358867	0.00372356	0.00532231	0.00508392	0.00154276	0.00139018	-0.000228162	-0.000991444	-0.00126441	-0.00056801	0.000918362	0.000306084	-0.000208808	0.000693174	0.000219636	9.93559e-05	4.48393e-05	0.000122485	9.52494e-06
MR1322_TraceCoords	G31	0.0676409	-0.0290888	-0.000517234	-2.16368e-05	0.00134066	-0.0029969	-0.00471379	0.00162337	0.00296618	0.000112138	0.000612301	-0.00350832	-0.000909373	0.000152683	6.33397e-05	0.000422813	0.000588914	-0.000523783	0.000467227	-9.23577e-05	0.000340242	-0.00030042	-0.000163668	-2.75368e-06
MR1323_TraceCoords	G31	-0.0962293	-0.0256022	0.0118552	0.0102162	0.00786114	0.00619426	-0.00236295	0.00207803	-0.0013421	0.000617322	0.000827202	0.00404929	0.000147697	0.000277113	-0.00117843	0.00063299	-0.0012914	-6.39939e-05	0.000590386	0.000259739	4.99893e-05	-8.93213e-05	-2.24022e-07	2.57184e-06
MR1324_TraceCoords	G31	0.0321232	0.0113025	0.00510918	0.00965523	-0.00343148	0.00154361	-0.00218369	0.00445434	0.00565639	-0.000534973	-0.000158821	0.00112154	-0.00109625	-0.000611753	-0.00171795	0.000355616	0.000536128	-0.000675371	0.000191469	0.000172286	-0.00022741	-3.33243e-05	-8.61175e-05	-2.46492e-05
MR1325_TraceCoords	G31	0.0131803	0.0146003	-0.0129083	-0.010229	-0.00828223	0.00693202	-0.00104515	0.00438482	-0.00272225	-0.0018685	-0.00156153	0.000438037	-0.000111112	-0.000855427	6.20565e-05	-0.000965059	-0.000401264	-0.00064819	8.05936e-05	-1.19373e-05	7.29958e-05	-0.000140752	0.000571661	-1.74806e-05
MR1327_TraceCoords	G31	-0.0103252	0.0190041	0.000417958	0.0142422	-0.00552524	-0.00666777	-0.00643106	-1.13777e-05	-9.28427e-06	-0.00307949	-0.00313578	-0.000781805	-0.000269817	0.000343883	0.000781032	0.000544763	-0.000473755	0.0007634	-2.1779e-05	0.000151084	-5.90922e-05	0.000531623	8.03276e-05	3.7687e-06
MR1332_TraceCoords	G31	-0.0457405	0.0116646	-0.00819642	-0.0102048	-0.00438777	-0.00360558	-0.00469943	-0.00399429	-0.00354109	0.0021273	1.23526e-05	-0.000641016	-2.67283e-06	-0.000540142	0.00240129	8.29608e-06	9.07661e-05	-0.000207103	0.000353013	0.000284498	0.000173951	-0.000143702	-1.75527e-05	-1.24552e-06
MR1333_TraceCoords	G31	-0.0243792	0.00263629	0.00739185	0.0103856	-0.00459437	0.00587701	0.0019515	0.000900487	-0.00191452	-0.0016571	-7.77004e-05	0.00064946	-0.00259966	0.000227049	0.000234278	0.00052966	-0.000212868	-2.60949e-05	0.000233871	-5.26139e-06	-3.77092e-05	0.000187709	-0.000181161	1.07057e-05
MR1334_TraceCoords	G31	0.0071022	-0.016553	-0.00043413	0.0010949	-0.00580002	-0.00342217	0.002351	0.0111243	0.0042274	0.00442055	0.000531402	-0.00378489	0.00183554	-0.00104033	-0.000731678	-0.000452547	-0.000782289	-6.72289e-05	6.68779e-05	-8.43879e-05	3.39223e-05	-0.000150153	4.17441e-05	-5.0248e-06
MR1335A_TraceCoords	G31	0.0247755	0.0156534	0.015651	-0.00380862	-0.000242002	0.00896442	0.00218692	-0.00122665	-0.00426069	-0.000469652	0.000456568	-0.000662928	-0.000612787	-0.000341594	-0.000303984	-0.0011482	0.000174869	0.000348091	-4.29003e-05	-0.000377136	0.000103223	-0.000263774	-0.000366553	-5.1097e-06
MR1339_TraceCoords	G31	-0.0625061	0.00680974	0.00175747	-0.00267492	-0.00107041	-0.000467097	-0.0015019	-0.00239356	-0.00236156	0.000766233	0.000726336	-0.000710893	0.00061904	-0.000428505	-0.000560491	-0.000194165	0.000114784	-0.000340022	0.00042413	-8.55843e-06	-0.000168051	-6.6255e-05	-7.99787e-05	-7.79343e-06
MR1340_TraceCoords	G31	-0.016293	0.0116736	0.00275207	-0.000181391	-0.00503334	-0.00820013	0.00928978	0.00289844	0.00381445	-0.00433364	4.19651e-05	0.00177827	-0.000298541	-9.71518e-05	0.000198365	0.000381853	-0.0010046	-5.40004e-05	-0.000417749	-0.000247426	-0.000140953	-6.63694e-05	-2.69789e-05	7.37869e-06
MR1341_TraceCoords	G31	0.00211514	-0.0189404	0.0109332	-0.00303732	-0.00210988	0.00480541	-0.00229215	-3.28876e-05	-0.000998163	0.00343792	0.00201663	0.00081788	-0.00179536	-0.000937847	-0.00045346	0.000386772	0.000918563	0.000231765	0.000789157	0.000168495	0.000319218	0.000124246	0.000177813	1.39319e-05
MR1343_TraceCoords	G31	-0.0876514	0.0214791	0.0238088	0.0158232	0.00871938	0.0098157	0.00282373	-0.00357886	0.000303848	9.02136e-05	0.00203056	-0.000436314	0.000874988	0.00156111	5.91191e-05	0.00174368	-0.000582813	0.000198296	-4.41279e-05	-0.000901602	-0.000292174	-2.76689e-05	-0.000104809	-2.82915e-05
MR1344_TraceCoords	G31	-0.0213958	0.00771777	0.005151	-0.00339621	-0.00336998	-0.0062789	-0.000472022	-0.00160222	0.000312881	0.00171692	-9.20606e-05	-0.00108468	0.000108021	-0.000959413	0.00166408	0.000143786	-0.0001563	0.000227666	9.38045e-05	-0.000258969	-0.000154817	0.000291129	0.000129859	-6.6584e-06
MR1345_TraceCoords	G31	-0.00547589	0.000505073	0.0046639	-0.00182016	-0.00441737	-0.00697671	0.00550205	-0.00232279	-0.000589697	0.00192683	0.000366156	0.000334907	-0.0012593	-0.000382906	0.000317009	0.000492252	-0.000307863	-0.000224034	-0.000467557	2.95664e-05	-4.55071e-05	-9.69633e-05	-4.09494e-05	-5.86947e-06
MR1352_TraceCoords	G31	-0.0781537	0.0219942	0.00184413	-0.00798975	0.00208796	-0.00593083	0.00881195	-0.00115617	0.00136951	-0.00352895	0.00245206	-0.000759141	-0.000255857	-0.000231474	-2.08499e-05	-0.000527686	0.000529202	-0.000504069	0.000606489	-0.000784917	0.000236246	0.000774302	3.31772e-05	1.24849e-06
MR1354_TraceCoords	G31	0.072206	0.00476624	0.00239087	0.0100876	0.000885787	0.0028904	-0.000359446	-0.00254604	0.00211875	0.00105568	-0.00363148	0.000106385	0.00181933	-0.00112356	-0.00101214	-0.000948068	-0.000326143	-0.000682663	-0.000229555	-0.000625337	-0.000247139	0.000692883	-0.000405532	-8.75814e-07
MR1356_TraceCoords	G31	-0.0320675	-0.0211372	0.00346409	-0.00472705	-0.00236232	-0.00437281	-0.00570984	0.00257116	0.00296787	0.000528657	0.00140051	0.000557288	9.50595e-07	-0.000203249	0.00016639	0.000270328	2.63058e-05	-0.000984775	-0.000575444	-0.000189299	-2.26984e-05	-0.000147234	0.000249053	-3.96181e-06
MR1357_TraceCoords	G31	0.00392185	0.0328742	-0.0084193	0.00831134	-0.00763503	0.00336794	-0.00219947	0.000870822	-0.000723948	0.0011224	0.0015876	0.00232023	0.00175473	8.2948e-05	-0.000194152	-0.000424025	0.000698797	-0.000533628	-0.000176846	-0.00019979	-0.000251147	-3.98702e-05	-5.22415e-05	8.96493e-06
MR1358_TraceCoords	G31	-0.0261609	0.0450308	0.00145303	0.00889558	-0.00322539	0.00117251	-0.00260662	0.00266537	0.00404479	0.00142095	0.00145364	0.000441555	-0.000871196	0.000166678	-0.000714652	0.00165986	-4.88281e-06	2.83483e-05	-0.000252569	0.00020501	-0.000343532	3.39337e-05	0.000326335	-9.46224e-06
MR1360_TraceCoords	G31	-0.0347822	0.0262836	-0.0059452	0.00758453	-0.00648233	0.00167267	0.000972965	0.000249629	0.00158319	0.00171746	0.000343651	0.000548956	-0.000926778	-0.000765243	-0.000780984	0.00125683	-2.00872e-05	-0.000619155	-0.000323476	2.04281e-06	-0.00022376	8.33048e-05	0.000117858	-1.015e-06
MR1361_TraceCoords	G31	-0.0560919	0.0135974	0.0008774	-0.0180605	-0.00156953	0.0171953	0.00013411	0.00497329	-0.000803265	0.000193319	0.000199034	-0.00264105	0.00224146	0.000904846	-0.000334699	-0.00141486	-0.00096431	-0.000140457	-0.000400864	-0.000192934	-9.52481e-05	0.000197744	-0.000284295	-2.6874e-07
MR1362_TraceCoords	G31	-0.137377	-0.0288461	-0.00311381	0.0175514	0.0152634	-0.00454504	0.00112783	0.0053142	0.000492418	0.00241156	0.0013579	0.00223807	0.00122617	-0.00199921	0.000391228	0.000548412	0.000208683	1.13618e-05	-0.00119451	0.000333636	-0.00039546	-0.00022447	-0.000217126	1.33174e-05
MR1363_TraceCoords	G31	-0.0635429	-0.0239913	-0.0224315	-0.00808921	-0.00721617	0.00879529	0.000280005	-0.00465319	0.00347355	0.000455334	-0.000966969	-0.00105522	-0.00113125	0.00163041	0.000867791	-0.000151552	0.000128307	0.00134581	-0.000562921	0.000474693	0.000364851	0.000626728	-0.000144396	-1.89413e-05
MR1365_TraceCoords	G31	-0.0792494	0.0190819	0.00445752	-0.00592792	0.00352717	-0.00973361	0.00223778	-0.00083456	-0.00366116	-0.003224	-0.000371978	-0.000465479	0.000616515	0.000192327	0.0010444	6.30884e-06	0.000776733	-0.000308612	0.00028277	0.000218752	0.000296386	0.000134061	-9.05766e-05	1.22987e-05
MR1368_TraceCoords	G31	0.0104007	0.00047479	0.0153964	-0.00364261	-0.00076167	0.00267644	-0.00100688	-0.00541999	0.000986985	-0.00440194	0.0016292	-0.000166597	0.000525454	-0.000834147	-6.52054e-05	-0.000875336	-0.000140263	0.000102043	-0.000148325	1.83204e-05	-3.82925e-05	-0.000283665	-0.000267336	-2.09584e-05
MR1369_TraceCoords	G31	-0.0826987	0.032271	-0.00755005	0.00288841	0.000652465	-0.00496061	0.0019366	-0.00546538	0.00188542	0.000505114	0.00378348	-0.00106291	-0.000451764	-0.00113958	-0.000261376	0.0014264	0.00128346	-0.000833875	0.000613777	-0.000500933	-0.000328623	-8.95392e-05	-0.000236219	-2.55499e-05
MR1370_TraceCoords	G31	0.0348375	-0.0104748	0.0106666	-0.00300146	-7.02219e-05	0.00804659	-0.00931503	-0.00323629	-0.0020049	0.000364026	-0.000229441	0.00133013	0.00116279	-0.000841644	0.0015441	0.000529231	-8.13972e-06	-0.000359109	-2.61835e-05	6.00315e-05	-0.000104502	-0.000276956	-0.000131135	1.55553e-05
MR1372_TraceCoords	G31	-0.0250145	-0.0157588	0.0146848	-0.00272002	-0.000637894	-0.0032136	0.00279603	0.0052078	-0.00186278	0.00194614	0.000381369	0.000354487	0.00189662	0.000361145	0.00037368	-0.000638136	0.000533199	8.2714e-05	-0.000100093	-0.000476838	0.000267106	0.000101775	9.77493e-05	-2.60368e-06
MR1375_TraceCoords	G31	0.128043	-0.0172086	-0.0153317	0.00249502	0.010966	-0.00158494	-0.00541515	-0.000819789	-0.00211768	-0.0023857	-0.00102213	-0.00223116	0.00151222	0.00278064	0.000494455	0.00188349	0.000847957	-0.00114928	-7.8143e-05	-0.000365869	-0.000862907	-0.000435384	0.000146859	2.24225e-06
MR1376_TraceCoords	G31	0.0739348	0.0142932	-0.00543493	0.00306671	-0.000830725	0.00423094	0.00171562	0.00278601	-0.000970601	-0.00018982	0.000248535	0.00162102	-0.00264033	0.000824129	0.00131035	-0.00116981	-0.000164053	0.000409682	0.000134115	-0.000411885	0.000240653	-0.000403388	-4.74104e-05	-6.88757e-06
MR1377_TraceCoords	G31	-0.00956497	-0.017574	0.00307927	-0.0138985	-0.00356436	0.00733244	-0.00626089	0.00172745	-0.000734289	-0.00208398	0.00263595	-0.000927458	-0.000389457	0.000747605	6.13051e-05	-0.000253263	0.000414992	7.36621e-05	2.36722e-05	-6.58049e-05	0.000252115	-4.49917e-05	2.21099e-05	-7.07258e-06
MR1378_TraceCoords	G31	-0.0759937	0.00375943	-0.00311593	-0.00217448	0.000706387	-0.0158339	0.000419136	0.000195815	-0.001274	-0.000335437	-0.00171632	0.000354215	-0.000715901	-0.000554538	0.000591805	0.000155424	0.000668427	3.63472e-05	-0.000244066	0.000249584	0.0001265	2.68976e-05	1.23713e-06	7.23342e-06
MR1380_TraceCoords	G31	0.0198393	0.0143123	0.00922258	0.00549872	-0.00248658	0.000787576	-0.00418975	0.0015059	0.00418714	2.14509e-05	-0.00176292	-0.000705635	0.00269464	-0.00187959	-0.0019193	0.00118812	-1.15015e-05	-0.000485056	-4.62514e-05	0.000295519	-0.000146994	-5.63013e-05	-0.00021796	-2.07735e-05
MR1381_TraceCoords	G31	-0.0549366	0.0492297	-0.0201672	-0.00421858	-0.00402286	-0.00270367	-0.010179	0.00329208	-0.0028531	-0.000322374	0.000374513	-0.00163413	0.000412667	-0.000161498	-0.00107348	-0.00114095	0.00145677	7.31132e-05	-6.09344e-05	7.3713e-05	0.000684982	0.000144009	0.000237458	-3.34607e-06
MR1382_TraceCoords	G31	-0.0526831	0.0243291	0.0147691	0.00228187	0.00116843	0.00566682	0.00268311	0.00014096	3.04065e-06	-0.00328854	0.00109771	-0.000753087	0.00184439	0.00111144	0.000667856	3.36912e-05	-0.000264778	-0.000421657	-0.000162393	-0.000552613	7.99147e-05	-0.000151553	-0.000377813	-7.06183e-07
MR1384_TraceCoords	G31	0.0766875	0.0114147	0.0150352	-0.00533996	0.0073788	0.00288528	-0.00266834	-0.00292659	0.00162331	0.000499939	-0.00121513	0.000115827	0.0010518	-0.00257282	-1.19971e-05	-9.07589e-06	9.43258e-05	-9.12812e-05	-0.000261276	0.000347569	-0.000600632	5.01704e-05	-0.000269428	1.6161e-05
MR1385_TraceCoords	G31	0.0656979	0.0151047	0.00332814	0.00759382	0.000614517	0.00108464	-0.00195527	-0.00194129	0.000903504	-0.000736554	-0.0048339	0.00180738	-0.00116133	-0.000230437	-0.000493205	-0.00030054	-2.4353e-06	-7.37e-05	9.64419e-05	0.000521676	-0.000490193	-0.000306873	7.20559e-05	-8.6934e-06
MR1386_TraceCoords	G31	-0.140895	0.00782067	-0.020417	-0.00215056	0.0108913	0.00758478	0.0010296	-0.00129205	0.00549857	0.000681118	-0.000999391	-0.00091968	0.000679558	-0.000965348	0.000195005	0.000276247	-0.000296644	7.4585e-06	-0.000763965	3.98297e-05	0.000322742	0.000102627	0.000150075	-2.78094e-05
MR1388_TraceCoords	G31	0.0617591	-0.00994493	0.0048704	0.000648676	0.000446071	-0.00297182	0.00364581	-0.000247737	0.000262989	-0.00239696	0.000761759	-0.00143392	-0.000205753	-0.000896015	-0.000534329	-0.000244322	-0.000590709	0.000158095	-0.000238822	-0.000161394	0.00013183	-0.0001739	2.41192e-05	1.47595e-05
MR1389_TraceCoords	G31	0.0288384	-0.0230807	0.00484848	-0.00247125	-0.00270289	-0.00574069	0.00510219	0.00133123	0.000128945	-0.00149785	-0.000393276	-0.00064997	0.000713363	0.000344956	0.000943086	0.000267752	-1.92801e-05	0.000107682	0.00022321	0.000107006	0.000320632	0.000121813	0.000113319	-1.3748e-05
MR1391_TraceCoords	G31	-0.0140612	-0.040519	-0.00628197	-0.0135953	-0.00329083	-0.0045275	-0.0116229	0.00156401	0.000752751	-0.00131558	0.000638643	-0.00012659	-0.00509805	0.00246765	-0.000933817	-0.00010146	0.000145891	-0.000140986	0.000875686	-6.31323e-05	-0.000125648	-0.000383876	0.00017845	1.30455e-05
MR1402_TraceCoords	G31	-0.0769294	-0.0217702	-0.0227952	0.0163649	-0.00433844	-0.00874499	-0.00854068	0.00284646	-0.00240204	0.000787797	-0.00213024	-0.00191419	-0.000119179	-0.00211755	0.000230513	-0.000162386	-0.000276894	-0.000221292	-0.000376357	-6.62356e-05	-9.03624e-05	-0.000240175	-0.000233039	-1.10685e-05
MR1404B_TraceCoords	G31	0.00890422	0.0358036	-0.00325105	0.0100669	-0.00635545	0.00298509	0.00282116	0.0021437	-0.000127087	0.00226548	-0.000132532	0.00155403	0.00132668	-0.000761895	-0.00097165	-0.000363434	9.09453e-05	0.000315093	-0.000144671	-1.02833e-05	-0.000410025	-0.000203677	-1.51352e-05	4.99502e-06
MR1407_TraceCoords	G31	0.116627	0.00427933	-0.00782491	0.00384774	0.00857724	0.00122955	0.00302489	0.00205156	0.00158621	0.00114657	0.001027	-0.000561005	0.000163678	9.35994e-05	0.00166063	-0.0014124	-0.00071329	9.18647e-05	0.000308641	0.000357604	0.000433029	-0.000163785	5.75345e-05	-3.95553e-06
MR1410_TraceCoords	G31	0.019035	-0.00942372	0.0111333	-0.00351738	-0.0020345	0.0062887	-0.000720237	-0.00238425	0.00146108	0.00170621	0.00211791	-0.000852375	0.000701113	0.000323601	0.00113628	-0.000135081	-9.81273e-05	-0.000124328	0.000203676	-9.34395e-05	0.000184995	-6.85918e-05	-0.000213798	-9.19005e-06
MR1411_TraceCoords	G31	-0.0164177	-0.0160563	0.0102955	-0.00155449	-0.00250484	-0.000765762	0.00170239	-0.00348744	-0.00101298	-0.00160453	-0.000730592	0.000539988	-0.00234774	0.000558813	-0.00100221	-0.00095673	-0.000148856	0.000240509	6.44594e-05	-0.000159297	-0.000150306	-6.22509e-05	-9.38538e-05	-1.332e-05
MR1412_TraceCoords	G31	0.0780236	0.00549621	0.0154579	0.00745261	0.00663265	0.000834921	0.000151288	-0.00393715	0.000585031	0.00225831	3.24899e-05	-0.00333379	0.000946472	-0.00141585	0.000315184	-0.00228108	-0.000763703	-0.000347618	-0.00027517	0.000327823	0.000125863	-3.27382e-05	0.000103452	-7.12808e-06
MR1413_TraceCoords	G31	0.0116229	-0.000342435	0.00560202	0.0015348	-0.00411796	0.00242123	-0.00374157	-0.00107006	-0.00102682	0.00141173	-0.00270534	8.43683e-05	0.000748021	-0.000628817	-0.0001835	-2.20563e-05	-0.000249529	4.01807e-05	0.000281326	-5.15651e-05	-3.93248e-05	-8.53385e-05	-0.000111358	2.34996e-07
MR1415_TraceCoords	G31	0.0181486	0.02953	-0.00204369	0.0134421	-0.0050433	-0.00824987	-0.00825307	0.00259263	-0.00164246	-0.00511252	0.00434273	-0.0024948	0.00114823	0.00106969	-0.00329327	0.000945123	0.000939044	0.00114089	-0.00105777	0.000511943	0.000841171	0.000510002	-0.000653877	1.3636e-05
MR1416_TraceCoords	G31	-0.0393275	0.00751311	-0.0163132	0.00347687	-0.00974128	0.00337506	0.00410993	-0.0066927	0.0024845	-0.00159689	0.0043503	-0.0015668	0.0029824	1.93146e-06	0.000340302	0.000473074	0.000519466	2.8571e-05	8.38459e-05	-0.000231179	-0.000298312	-0.00027953	-0.000127532	1.29008e-06
MR1420_TraceCoords	G31	-0.0718861	0.00665711	-0.0384754	-0.0122008	-0.00971549	0.00451781	0.00988139	-0.00346532	0.000997067	0.000660426	7.99053e-05	-0.00124948	-0.000864431	0.00032557	-0.00147051	-0.000196693	0.000432332	-0.000100276	-0.000640345	0.00131895	8.98109e-06	3.62728e-05	0.000239635	5.93553e-06
MR1422_TraceCoords	G31	0.0291759	0.00714791	0.00756386	0.00999827	-0.00362425	-0.0013794	0.00771934	0.000762643	0.00231857	0.00136681	0.00217561	-0.00196339	0.000578011	-0.000329678	0.000697688	-0.000135924	-0.000450213	7.15987e-06	9.94418e-05	8.78581e-05	0.000207317	0.00010758	0.00012732	2.98243e-05
MR1423_TraceCoords	G31	0.0073574	-0.00297611	0.00430303	-0.00399999	-0.00380547	0.00415361	-0.00785668	0.000913647	-0.00297372	0.00210195	0.000442169	5.42003e-05	-0.000544354	-0.000181739	-0.000584966	0.000745315	-4.13306e-05	-0.00124766	0.000107646	-0.000387751	0.000207596	-0.000262217	-0.000225494	-3.05182e-06
MR1426_TraceCoords	G31	-0.0121992	-0.00196716	0.00391669	-0.00507911	-0.00482725	0.00547004	-0.000166448	-0.00183324	-0.00066198	0.00181948	-6.90089e-05	-0.000443849	-0.000103	-4.90043e-06	0.000328459	-6.37528e-05	-0.000136013	3.6178e-05	0.000402052	-8.59303e-06	-0.000162899	2.76894e-05	9.93338e-05	3.93305e-06
MR1428_TraceCoords	G31	0.0467232	-0.00664909	0.0171857	3.96975e-05	0.00290355	-0.00417961	0.00101747	-0.00580478	0.000909003	-0.00126871	-0.00182803	0.000494986	-0.00136818	-0.00168408	-0.000752919	-0.00120343	-0.000448142	0.000400243	-0.000324241	-0.000302276	-0.00062893	0.000422828	-0.000121465	-2.83909e-05
MR1429_TraceCoords	G31	-0.0159245	0.0206519	-0.00673306	-0.00633468	-0.00789538	0.014627	0.00445463	-0.00244374	-0.000913077	3.63506e-05	1.12015e-05	0.000929623	-0.00134882	0.0009733	-0.00117433	-0.000319574	0.000443616	-0.000350589	-0.000275828	-3.56489e-05	-8.83508e-05	-4.72549e-06	-0.000237806	1.48177e-05
MR1431_TraceCoords	G31	-0.0485252	0.023379	0.0032968	-0.000462411	-0.0023841	0.00358112	4.5294e-05	-0.00201556	0.00285857	-0.00144966	5.83808e-05	-0.000948292	7.01919e-05	0.000460731	-0.000863849	0.000187532	-0.000510106	-0.000780178	0.000173975	0.000384601	-0.000205562	0.000112048	-0.000113531	-1.31784e-05
MR1432_TraceCoords	G31	-0.00587324	0.00459277	0.0223393	0.00635397	-0.000432423	0.00210423	0.0134156	0.00361618	-0.000927063	-0.00371722	0.00111224	-0.00065886	-0.00160162	0.00027768	0.000572892	-0.00056192	-0.000520805	0.000281604	-0.000159972	2.88864e-05	0.000333615	-0.000305419	-5.46277e-05	-1.45468e-05
MR1433_TraceCoords	G31	0.0636044	-0.0107092	0.00808976	-0.00675939	0.00268828	0.00199189	-0.00156149	-0.00371965	-0.00197456	0.00120255	-0.00103474	0.00104227	0.00031755	-0.000704773	0.00112946	0.000655207	0.000103419	-0.000286857	-0.000715905	-5.36826e-05	-1.22789e-05	3.3591e-05	-8.69875e-05	-2.21169e-05
MR1434_TraceCoords	G31	0.0233502	-0.0256615	0.00886537	-0.00224734	-0.00178936	0.000132041	0.00125137	0.000658411	-0.00116817	0.00038142	-0.0009393	-0.000736859	0.000294551	-0.000499551	-0.000549767	-1.32028e-05	0.00106249	0.000128752	0.000677588	-0.000236855	0.000504715	-0.000244107	0.000236944	4.57349e-06
MR1435_TraceCoords	G31	-0.0338295	0.0177076	0.0138822	0.00283489	-0.00062262	0.000940088	-0.00171329	-9.32424e-05	0.000463597	-0.0011642	0.000350657	0.000179499	-0.000140282	7.55128e-05	0.000447449	0.000491785	-0.000498089	0.000199014	0.000251584	0.000165446	-2.72817e-06	-3.43784e-05	-5.87752e-05	-2.76076e-05
MR1437_TraceCoords	G31	-0.131196	0.00579154	0.0122049	-0.00235368	0.0177564	-0.00309959	0.000337714	0.00231391	-0.00360141	0.0024266	0.00130893	0.00214355	0.00284405	0.00201002	0.000398927	-0.000945455	0.00119871	-0.0001429	0.000153286	0.000404167	0.000170391	-0.000138898	-0.000176709	1.08402e-05
MR1439_TraceCoords	G31	-0.0844578	0.0113438	0.0107041	0.00328891	0.0047295	-0.00287318	0.00313096	0.000392936	-0.00319153	-0.000421086	0.00349227	-0.000923529	0.000439537	-0.000104114	-0.00113767	0.000608578	0.000139828	-0.00019358	0.000671968	0.000196764	-0.000156842	0.00030186	-7.85525e-05	1.86453e-07
MR1440_TraceCoords	G31	-0.0620619	-0.0122013	0.010168	-0.00843679	0.00240269	-0.00262882	-0.000493905	0.000255569	-0.00428145	0.00789051	-0.000568153	0.00159457	-0.00101734	0.00100202	0.0015882	-0.000312226	-0.00043293	-0.000186175	0.000159065	0.000638943	-0.000320112	-0.000423276	-0.000277357	1.30561e-05
MR1442_TraceCoords	G31	0.00680124	0.0194502	0.00189091	-0.000982184	-0.00486547	-0.00068264	0.000893471	-0.00122613	-0.0014701	0.00205884	-0.00141574	-0.000540294	0.00112271	-0.00100055	-0.000856428	-0.000578808	-0.000369724	1.69456e-05	-0.000126256	2.62991e-05	3.28548e-05	-0.000414492	0.000217714	1.04236e-06
MR1444_TraceCoords	G31	-0.0566487	0.0582357	0.00716114	0.0128565	0.00237589	-0.000352913	0.00061444	-0.00632483	0.00125271	0.00411187	-0.00281074	-0.00211337	0.000518309	0.00286241	-0.000268001	0.00213947	0.000279954	0.000936445	0.000128273	1.54476e-05	-0.000865795	-0.000815512	0.000453315	-5.29699e-06
MR1446_TraceCoords	G31	-0.0456028	-0.0328492	0.0115685	0.0017365	0.000479364	0.00146237	-0.000167456	-0.00166443	0.00170141	0.000548557	-0.000739277	0.00315693	0.000303966	0.0013351	-4.93028e-05	0.000223166	-0.000481139	0.000188114	0.000191871	0.00022661	0.000110661	0.000172359	-9.00644e-05	-9.43969e-06
MR1448_TraceCoords	G31	0.00476929	0.0191059	0.00077938	-0.00711356	-0.00452544	-0.00119878	-0.00203705	-0.000691384	-0.00541948	0.00075949	0.00034377	-0.00131292	0.000622612	-0.000375993	-0.000161815	5.87783e-05	7.73659e-05	0.000166924	-0.000228137	-3.92037e-05	0.000219174	4.2288e-05	-7.49332e-06	2.80765e-06
MR1449_TraceCoords	G31	-0.0924505	-0.0232412	-0.00510686	0.000512295	0.00205519	0.00423303	0.000865546	0.00206987	-0.00306425	-0.0014701	0.00283049	-0.000143461	0.0011482	-1.46772e-05	-0.00188055	-0.000413585	0.000426025	-0.000144938	0.000310176	0.000159864	4.16065e-05	1.79771e-05	0.000358702	-2.8352e-06
MR1450_TraceCoords	G31	0.0481994	0.015224	0.014626	-0.0195479	0.00412858	-0.00668405	0.00754725	0.000671595	-0.00136747	0.00142002	0.0035229	0.00209486	0.0016687	-0.00183076	-0.000183657	0.000892997	-0.00161368	0.000162516	-0.000682369	-0.000283443	0.000233619	-2.81221e-05	9.93792e-05	-1.23277e-06
MR1451_TraceCoords	G31	-0.0593056	0.0421629	-0.00142617	0.0129526	-0.00124001	-0.00119015	-0.00397254	0.00694408	-0.00970356	-0.00291694	-0.00341687	-0.0008885	0.000182002	0.000978644	0.000428135	0.00164516	0.0008256	0.00121163	-0.000489514	0.00114233	0.0001367	0.000687653	0.000305277	-3.29526e-06
MR1457_TraceCoords	G31	0.00882519	0.00370114	0.0201341	-0.00556761	0.000360384	0.00668345	0.00176504	0.00333533	-0.00097696	0.00314548	4.935e-05	-0.0021026	-0.00115563	-0.000230014	-0.000554173	-0.00101575	4.06048e-05	0.00019936	0.000258583	-0.000331277	0.00013833	7.23618e-05	-7.11099e-06	1.12552e-05
MR1458_TraceCoords	G31	-0.0902167	0.0486754	0.00761379	0.00273965	0.00785129	-0.0111569	0.0116948	-0.00305123	0.00382191	-0.00109148	-0.000560702	0.000753635	0.00415494	0.00216031	0.00153143	0.00137043	0.00199135	7.93716e-05	-0.000188137	-0.000415394	0.000105638	-0.00103741	-0.000247981	2.63376e-05
MR1459_TraceCoords	G31	-0.0990576	-0.0171334	0.0089668	-0.0048664	0.00836643	0.00951235	-0.00618218	0.00885231	-0.00112551	-0.00223885	-0.000160335	0.000896088	0.00102694	0.00149419	0.000261407	-0.00138984	-0.00201891	-0.000559834	-0.000144574	0.000112167	0.000296553	-0.000112035	0.000424195	4.35157e-06
MR1461_TraceCoords	G31	-0.0230512	-0.000102893	0.000497177	-0.00771506	-0.00442757	-0.00647949	0.00122829	-0.00234483	-0.00354851	0.00226552	-0.000184107	-0.000318758	8.78223e-05	-0.000626493	-0.0019606	-0.00050862	-0.000332632	-0.000343393	-7.27076e-05	4.11952e-05	-0.00023322	-0.000109466	-0.000147752	-1.03908e-05
MR1462_TraceCoords	G31	-0.0582461	0.0483751	0.00427474	0.00730552	0.000773556	0.000195557	-0.000369617	-0.00341457	-0.000344901	0.00104067	-0.00046461	-0.00168	0.000113373	0.00137594	-1.93818e-05	0.00135885	0.000239519	0.000761183	-2.18748e-05	-0.000144584	-0.000371371	-0.000485705	-3.53352e-05	-6.59318e-06
MR1463B_TraceCoords	G31	-0.0392021	-0.0148857	0.0209103	-0.0023688	0.00275988	0.0029863	-0.00643783	0.00148097	0.00278894	-0.000501443	-0.00338251	0.00236219	0.00261321	0.00033784	-0.000113746	0.000129796	-3.01119e-05	-8.21618e-05	0.000126698	-9.91223e-05	3.50366e-06	-0.000292695	0.000142947	-2.17025e-05
MR1465A_TraceCoords	G31	-0.0570317	-0.00205709	0.00906778	0.00658145	-0.000590651	-0.00603903	0.00818288	0.00549197	-0.00138973	0.00161756	0.000529023	0.000568924	-0.00151641	-0.000195688	-8.95065e-05	0.00059991	0.000596618	-0.000452579	-0.000419488	0.000165055	-3.0279e-05	0.0001477	-0.000109059	9.33887e-06
MR1465B_TraceCoords	G31	-0.126132	0.0116477	-0.00233547	-0.00638152	0.0123559	-0.00126018	-0.00205008	-0.00345585	-0.0017886	-0.0012315	-0.001137	0.000214674	-0.000843931	0.00017312	0.0011365	-0.0011887	-0.000273688	0.000111903	0.00075138	-8.29385e-05	0.000172157	0.000157671	9.36694e-05	9.25865e-06
MR1466_TraceCoords	G31	-0.021414	-0.00678002	0.00662378	-0.000329015	-0.00351083	-0.00431277	0.00113413	-0.00300246	-0.00198652	-0.00129934	-0.00190883	0.00122862	0.000694406	0.000141129	-6.38594e-05	-0.000200106	0.000343267	-5.58234e-05	-3.53084e-05	-9.47018e-05	0.000149527	0.000172849	-2.56451e-05	1.92735e-05
MR1467_TraceCoords	G31	-0.102125	0.0202185	0.017222	-0.00721319	0.0117142	-0.00823527	0.0116567	0.00117458	0.00109534	-0.0031763	-0.00090021	0.00246219	0.00104733	0.00344291	0.00132625	-0.00136036	0.00067032	-0.000333791	-0.000334989	-0.000468958	-0.00018666	0.000280249	5.89343e-05	-2.24441e-05
MR1469_TraceCoords	G31	-0.0333481	0.00638679	0.00850891	-0.00385209	-0.00235836	0.00442139	-0.000521611	-0.00255584	-0.00205932	-0.00080887	-0.000722318	0.000567553	0.000110395	0.000114471	0.000141807	-0.000322208	-4.50718e-05	-0.000372716	0.00026599	6.27057e-05	-5.12945e-05	-0.000143694	-5.09852e-05	7.26981e-06
MR1470_TraceCoords	G31	-0.0807639	0.021385	0.00772606	-0.00678154	0.00417901	0.0105213	-0.0012332	-0.00247372	-0.00376837	-0.000239181	-0.00104904	0.00057533	-0.00126718	0.000137914	-0.000949531	-0.000419775	-0.000738124	-0.000645452	0.000467373	-0.000103222	0.0006931	-0.000898894	-2.08513e-05	7.70591e-06
MR1471_TraceCoords	G31	-0.0793558	-0.0142662	0.00263174	-0.000755995	0.00212491	-0.00680083	0.00107074	0.00323296	0.000600355	-1.34876e-05	0.00261817	0.000661213	-0.000273751	0.000501359	-0.000544414	-0.000300191	0.000284514	-0.000534773	-0.00032088	-6.78376e-05	-0.000402221	0.000303971	7.35679e-05	-2.74063e-06
MR1472_TraceCoords	G31	-0.0524075	-0.0050494	-0.00558449	-0.0190817	-0.00282475	0.00816095	-0.00803782	0.00255201	0.00139331	0.00219167	0.00194061	-0.00275627	-0.000250274	0.00092312	0.000824986	-0.00183135	-0.000698256	0.000169034	-0.000332222	1.36757e-05	-0.000317671	0.000343693	-8.0694e-05	2.03182e-05
MR1474_TraceCoords	G31	-0.0734906	0.0172901	0.0060533	-0.00923099	0.00253543	-0.00253756	0.00330809	0.00156922	0.00101562	0.00263268	-0.000969739	-0.00038145	-0.0010772	0.000144061	0.000478052	-0.000496167	-0.00021796	-4.89086e-05	0.000214737	0.000130538	-0.000376843	9.23125e-05	-3.09026e-05	-7.25794e-06
MR1475_TraceCoords	G31	0.034804	0.0207091	-0.00696306	0.017104	-0.00757739	0.00416855	0.0088849	0.00364427	0.00511969	0.00246217	0.000759303	0.00399623	-0.00107634	0.000381856	-0.000295855	0.000198848	-0.000516518	0.000109723	0.000509546	0.000584254	-0.000302306	-0.000461701	-0.000120283	3.11948e-05
MR1476_TraceCoords	G31	0.0317386	0.0182684	0.00324565	0.00420269	-0.00285574	0.0024629	-0.00931714	1.05021e-05	-0.00128142	0.000893459	-0.00103087	0.000564424	0.00227978	-0.000407509	-0.00012631	0.000106569	0.000677199	-0.000237171	-0.000390728	-0.000100636	0.000237512	7.49034e-05	-0.000253464	-3.66492e-05
MR1477_TraceCoords	G31	-0.0891321	-0.019577	-0.0235345	0.00426978	-0.0028055	-0.00621695	-0.000445695	-0.00356766	0.00206038	0.00154575	-0.000945077	-0.000489322	-0.00119666	-0.00146259	-0.000162181	-5.56231e-05	0.000369399	0.00034477	-0.000297789	-0.00010987	-0.000218853	-7.59999e-05	-0.000164495	3.62386e-06
MR1478_TraceCoords	G31	0.121744	-0.0039034	-0.0110714	0.00502165	0.00850012	0.00659735	0.00241234	0.00490476	0.000965499	-0.000716125	0.000382682	0.000200941	0.0012678	0.000604055	-0.000544233	-0.000508617	0.000908749	0.000760523	0.00110777	5.41147e-05	8.29874e-06	-0.000385194	-0.000147736	8.08391e-06
MR1484_TraceCoords	G31	0.0895857	-0.000294871	-0.00237453	0.0107136	0.00382583	-0.00925195	-0.00193188	0.0014946	0.00199857	0.00197992	-0.000501239	-0.00362276	-8.32174e-05	0.000535902	-0.00144	-0.000558954	-0.00127423	-0.00150486	0.000277978	4.49556e-05	0.000613918	0.000389053	-0.000347205	2.78816e-05
MR0001_TraceCoords	G33	0.057617	-0.00742655	0.00758556	0.00599123	0.00081928	-0.000860064	-0.00341779	-0.00272605	-0.00188422	1.20586e-05	-0.000484984	-0.00176744	0.000413223	-0.000441329	0.00111545	-0.000104251	0.000113047	-0.000440659	6.10193e-05	0.000152408	-4.59645e-05	-4.13351e-05	0.000409664	-7.39802e-06
MR0003_TraceCoords	G33	0.0583167	-0.0081436	-0.0011344	-0.00286198	-0.00216319	0.00191229	0.00448895	0.00244261	0.0017788	-0.00201087	-0.000773729	-0.000112088	-0.000512225	-0.000744161	-0.000638662	0.000403757	-7.06655e-05	0.0004319	0.000562481	0.000138565	-1.01418e-05	-1.98099e-05	-2.14763e-05	-4.87747e-06
MR0004_TraceCoords	G33	0.0280939	0.0189341	-0.00214304	-0.00487934	-0.00473601	-0.00635305	0.00572305	0.00611403	0.0008061	-0.00132659	0.00124276	-0.000321916	-0.000920912	-0.00104205	-0.00118606	0.000594277	-0.00112421	0.000218067	0.000131345	8.48147e-05	0.000221761	-0.000190782	-0.000207481	1.35768e-05
MR0005_TraceCoords	G33	0.0491041	-0.0239169	0.00513688	-0.00078533	-0.000263865	-0.00122395	-0.00250119	-0.000616589	-0.00087341	0.000684403	0.00158366	-0.00162995	-0.000876008	0.000406963	0.000719488	0.000258532	0.000309067	-8.25859e-05	3.41218e-05	-0.000275895	-0.000146665	-0.000108992	2.11686e-05	-2.15864e-05
MR0006_TraceCoords	G33	-0.0199173	0.00735967	-0.000796622	-0.000579387	-0.0065551	0.0106308	0.00043594	0.00107472	-0.000848247	-0.000869189	-0.00135106	-0.000242063	-0.000130719	-0.000230911	-0.000638424	-0.000737993	-0.000189027	-0.000299594	-0.000201378	-0.000419606	-0.000295976	-0.000176942	-0.000284666	6.61469e-06
MR0007_TraceCoords	G33	-0.000471517	-0.030142	-0.00466024	-0.0142874	-0.00405288	-0.00587717	-0.00576794	-0.0070375	-0.00116189	0.00310876	-0.00135233	0.000440524	0.000796068	0.00068771	0.000529127	0.000364367	-8.71473e-05	0.000143486	0.000167921	0.000633051	-0.000358519	0.000318355	-9.89414e-05	1.2625e-05
MR0008_TraceCoords	G33	0.0653211	0.00471178	-0.00742835	0.00470889	-0.00421247	0.00811313	0.0116386	-0.000389722	-0.00306521	0.000185583	0.000409752	0.000344383	-0.00127662	0.00091069	0.000703254	-0.00107665	-0.000321228	0.00129656	-0.000193371	-7.25156e-05	-0.000106971	-0.000152847	0.00022374	3.32647e-06
MR0009_TraceCoords	G33	-0.00802999	-0.000956174	-0.0220084	0.000765234	-0.0107859	-0.00990735	-0.00518049	0.000454203	-0.00130174	-0.00395695	0.00195991	-0.00314027	0.00104743	-0.000487719	-0.000484794	6.32445e-05	0.000227857	-0.000320358	3.99428e-05	-0.000192026	-0.000302506	-0.000258245	-0.000171787	6.46281e-06
MR0010_TraceCoords	G33	0.00633836	0.0393169	0.0149142	-0.0117099	0.00294996	-0.0156051	-0.0027756	-0.000469051	-0.000274553	-0.00456639	-0.00155362	-0.000281322	0.000494146	-0.000128359	-2.02249e-05	0.00141399	-0.000586672	0.00116074	6.71718e-06	0.000775064	7.08677e-06	0.000151218	0.000296066	1.42458e-05
MR0011_TraceCoords	G33	-0.00392586	-0.0172924	0.0117658	-0.010197	-0.00170461	0.00360713	0.00066369	0.00182302	0.000133106	0.00331761	0.00215547	0.000245042	-0.00201699	0.00137481	0.000686833	0.000369669	0.000216809	0.000201503	0.000594789	0.000274607	1.92512e-05	0.000128935	5.04098e-05	-2.84082e-06
MR0013_TraceCoords	G33	0.020054	0.0274394	0.0173234	0.00193476	0.000699494	0.00623024	-0.00249094	-0.00450106	0.000561057	0.00175623	-0.000855057	-0.000890698	0.0022662	-0.000618468	-4.57507e-05	-0.000634627	-0.00015996	0.000307536	1.70924e-05	-0.000261302	-0.000374515	-0.000232611	2.14405e-05	-4.32725e-06
MR0015_TraceCoords	G33	0.0183235	0.0132321	-0.00880298	0.00487257	-0.00810709	-0.00176105	0.0031805	-0.00293465	-0.00391162	0.00113703	0.0017438	0.000805209	0.000613062	-0.000548959	3.98743e-05	-0.00025318	8.81727e-05	-0.000163969	-0.00031052	-0.000266916	0.00019654	-0.000206333	-0.000120886	-1.64343e-05
MR0016_TraceCoords	G33	-0.00275916	0.0247425	-0.00896754	0.00474835	-0.00820348	0.00152565	-0.000519833	-0.00291466	-0.00025585	0.000125532	0.00158851	0.00112615	-0.00033953	0.00052884	0.00152997	-0.000324018	2.93223e-05	-0.0002289	0.000140115	0.000110469	-0.0001383	-7.63277e-05	-1.73151e-05	1.38942e-05
MR0018_TraceCoords	G33	0.0396801	0.0150663	-0.00753565	-0.00573927	-0.0050152	0.00497276	-0.00672586	0.0025271	0.000331802	0.00215228	0.000174993	0.000945474	-0.000525862	0.000308486	0.000544647	0.000127842	0.000520556	-0.000360699	0.000179833	-0.000714729	0.000146407	0.000237079	8.17423e-05	-6.87932e-06
MR0020_TraceCoords	G33	0.00234793	0.00709998	0.0026372	-0.00944066	-0.00364124	-0.00865676	-0.00179856	-0.00161836	-0.000456154	0.000502829	-0.000380305	-0.000159561	-0.0011432	-0.0006447	-0.000795375	0.000184275	-0.00042109	8.93175e-05	4.93632e-05	2.96681e-05	7.85815e-05	4.26514e-06	9.73486e-05	-4.05051e-06
MR0022_TraceCoords	G33	0.107418	-0.0105587	0.00760165	-0.000456723	0.0113448	0.00163287	0.00119455	0.00103399	-0.00396119	-0.000536261	-0.0034367	-0.00181535	-0.00182456	-0.00119452	-0.00113994	-0.000565185	0.000182699	-0.000273963	-0.000423112	-0.000204821	-0.00015766	-0.000246	-0.000298005	-9.52867e-06
MR0024_TraceCoords	G33	-0.0150535	-0.0151654	-0.0040004	0.000521396	-0.00693918	-0.00700118	0.00581202	0.00141521	0.00341158	0.000277457	-0.00252796	0.000129858	0.000419654	9.16118e-05	-0.000685166	0.000112797	-2.79358e-05	-0.000195396	-0.000373218	-0.000269945	-3.23761e-05	-8.60028e-06	-5.19119e-05	2.25694e-06
MR0025_TraceCoords	G33	-0.0626642	-0.00484269	-0.0110374	-0.00621294	-0.00405604	-0.00618291	0.00240176	-0.000759757	-0.00496821	0.00472969	-0.00025536	-0.000659726	-0.000984223	-0.000422955	-0.000792729	-3.9304e-05	-0.000123138	-0.000648242	0.000527072	0.000315095	-0.000231598	2.6441e-05	-1.28487e-05	2.3505e-06
MR0028_TraceCoords	G33	-0.0773723	-0.0051361	0.0101544	-0.00843478	0.00425873	-0.000996464	0.000213446	-0.0023268	-0.00156893	0.00354391	0.00372443	0.000988681	-0.000409742	0.00135688	9.85863e-05	-0.000346998	-0.000107776	-0.000263975	0.000657692	5.83225e-05	-0.000367819	-4.95279e-06	-0.000107407	6.78351e-06
MR0030_TraceCoords	G33	-0.0368325	0.0171519	-0.0148111	-0.0257726	-0.0055388	-0.00444877	0.00193114	-0.000396571	0.00106	-0.000499497	-0.00253381	0.00045186	0.00118449	-1.9411e-05	0.000701066	-0.000740203	-0.000203184	-0.00033787	-4.63412e-05	8.52357e-05	0.000435911	-6.4053e-05	0.000190273	9.66777e-06
MR0031_TraceCoords	G33	0.0635245	0.00727138	-0.00214603	0.00103607	-0.00144439	0.00790638	-0.00250883	-0.00518821	0.00150369	0.000484758	0.00236503	0.000872643	0.00105795	0.000228163	0.00143888	-0.000733945	0.000317203	-0.000312926	-0.000227249	0.000343525	-0.000220728	0.000133605	0.000111749	9.34279e-06
MR0033_TraceCoords	G33	0.0681364	-0.00711836	0.0111534	0.00031867	0.00379647	0.00197911	-0.00254141	-0.00175979	-0.00313406	0.00198384	0.000531629	-0.000674509	-0.00170737	-8.71358e-05	-0.000425359	-0.000460295	9.60858e-05	-0.000464745	-0.000122669	-0.000112555	0.00026352	-1.64623e-05	-0.000109606	2.21905e-06
MR0034_TraceCoords	G33	-0.0372533	-0.00356037	0.00514869	-0.00757349	-0.00203031	-0.010364	0.00176454	-0.00168308	0.00108701	-0.00128617	0.00137034	0.000482573	-0.000604451	0.000110567	-0.000283868	-0.000462683	2.48113e-05	-1.47128e-05	2.38237e-05	-8.63715e-05	-7.95288e-05	0.000225685	-7.69481e-05	-2.43945e-05
MR0035_TraceCoords	G33	-0.00222175	0.00801799	0.0179564	0.00192597	-0.000785995	0.00120297	0.000795136	0.00249635	-0.00100656	-0.00237804	0.000750299	-0.000209687	-0.000795769	-0.000331663	-0.000333119	0.000169351	-0.000327854	0.000315709	0.00024781	0.000111137	-0.000116122	0.000265644	-9.66038e-06	-1.81376e-05
MR0036_TraceCoords	G33	-0.0519861	0.0175208	0.00994345	-0.00610516	0.000486131	0.00708011	-0.00444542	-0.00232535	0.000980571	0.00100496	-0.00158823	-0.000383488	-0.00129326	0.00125465	0.000245512	-0.000396066	-0.0010384	-0.000680951	0.000115095	-0.000474237	3.62751e-05	9.80925e-05	-5.60038e-05	1.25547e-05
MR0038_TraceCoords	G33	-0.0768953	0.0583784	0.0221	-0.00928105	0.0123032	0.00306604	-0.00575142	-0.00520435	0.00252866	0.00042259	-0.00385082	-0.00281319	0.00462122	0.00241546	-0.00365849	0.00135526	0.000468115	0.00114467	0.000776886	-0.000661673	-0.000669597	-0.000687896	0.000322723	-3.18624e-06
MR0040_TraceCoords	G33	0.091127	0.0171577	-0.0208089	-0.00245984	0.000628232	-0.00872865	-0.00547099	0.000951912	-0.00233576	-0.00234163	0.00166493	0.00092163	0.00330062	0.000677128	0.00014697	0.000270789	-0.000191137	-0.000498129	0.000163378	0.000128233	-0.000195201	0.000138119	-1.55164e-05	4.03095e-06
MR0041_TraceCoords	G33	0.0946558	0.0148148	0.0122106	0.00652982	0.00993736	0.00140698	-0.00724524	0.0018754	-0.00119452	-0.0048873	0.00292913	-0.00263557	0.00140703	-0.00122863	0.000663745	-0.00124413	0.000421935	5.15226e-05	-0.000675218	0.00109037	-8.23998e-05	0.000444458	-0.000119684	-1.91651e-06
MR0044_TraceCoords	G33	0.0376769	0.00283038	0.00344761	0.0104035	-0.00394717	0.00126509	0.00214051	0.000118515	-0.00490721	0.000367998	-0.000278279	-0.000674203	-0.000236888	-0.000113844	0.000261344	-0.000134345	0.000130967	0.000241724	-2.52836e-05	-0.000154763	-2.81099e-05	-0.000139511	0.000276687	-1.66631e-06
MR0045_TraceCoords	G33	0.00605992	-0.00166015	0.00162292	-0.0130403	-0.00387971	-0.00452692	-0.00125122	0.0014091	-0.00122263	0.000299199	-0.00165828	2.58984e-05	-0.000311869	-0.000498839	-0.000106932	1.03297e-05	0.000221446	-0.000525642	-9.53732e-05	-0.000311722	-2.15994e-06	-0.000244963	4.12834e-05	-2.01296e-05
MR0047_TraceCoords	G33	-0.0220393	-0.000910135	0.00764613	0.000953172	-0.00261936	-0.00613813	-0.00411149	-0.00419449	-0.00288879	0.00246228	0.0024884	-0.000509096	0.00159498	-0.000588704	-0.0020457	0.000260432	3.36673e-05	-0.000749271	0.000233156	0.000118327	3.74567e-05	6.09229e-05	-6.45003e-05	9.15492e-07
MR0048_TraceCoords	G33	0.139795	0.0177104	-0.00762563	-0.0240691	0.0196402	0.00121595	0.00277677	0.00761294	0.00318757	0.00122792	0.00254107	0.00256462	-0.00105269	-0.00303079	0.00101012	0.00198321	-0.00154718	0.00191958	0.000833458	-0.000693939	0.000200933	0.000338765	8.04586e-05	1.33293e-06
MR0050_TraceCoords	G33	0.0985393	-0.00296054	-0.00811231	-0.00169816	0.00417222	0.00795237	-0.00498883	0.000198186	-0.000766131	-0.00199271	0.000523676	0.00209246	-0.000963212	0.000984906	0.000694021	-0.000328768	0.00181196	-9.71634e-05	-3.71568e-05	-4.91668e-05	-0.000357846	-9.54113e-05	0.000227206	4.806e-06
MR0052_TraceCoords	G33	0.0662669	-0.0157129	0.00354906	0.00439118	0.00167667	-0.0127871	0.0010314	0.000873306	-0.000744085	-0.00448988	0.00259594	-0.00379248	0.000524603	0.000197833	0.00161892	0.000408019	-0.000867635	-3.49456e-05	-0.000272975	0.00028125	0.000105781	-0.000233103	0.000220142	6.69755e-06
MR0053_TraceCoords	G33	-0.0307262	0.00312545	0.00496101	-0.00555702	-0.00348493	0.000101486	0.00281858	-0.00224901	-0.00238927	-0.00358289	0.00390939	-0.00149167	-0.00166181	0.000951985	0.00147249	-0.00014453	-0.000686002	-0.000683145	0.000191233	0.000166314	-0.000173925	0.000215515	6.38879e-05	1.2258e-05
MR0055_TraceCoords	G33	-0.0287936	-0.00891577	0.00301055	-0.00402206	-0.00412507	-0.0073309	0.00950599	0.00094966	-0.00165039	0.00230817	-0.00289587	0.00128728	0.00265212	-0.000591484	0.00130596	0.000285076	0.000600872	-0.000354752	-8.30474e-05	0.000163113	0.000196044	3.83449e-05	4.70513e-05	-4.40554e-06
MR0056_TraceCoords	G33	0.00117504	0.0321994	0.000409503	-0.0011375	-0.00460668	-0.00496722	0.00422605	-0.000472694	0.000573747	0.00388619	0.00111666	-0.00110662	0.00106097	-0.000624808	-8.70818e-05	0.000441313	-0.000500467	0.000120368	0.000134312	-0.000111047	6.19132e-05	-0.000237539	1.69632e-05	-9.018e-06
MR0059_TraceCoords	G33	-0.106346	0.0216774	-0.000435606	-0.000770226	0.0067643	6.96632e-05	0.00232096	-0.00111408	0.000663278	-0.00249883	-0.000124772	-0.00071454	-0.000789032	0.000163267	-0.00018707	0.000621227	1.30863e-05	-0.000534575	0.000130419	-0.000210257	-2.79812e-05	0.000266709	-0.000268321	-1.0581e-05
MR0061_TraceCoords	G33	0.0464593	0.0203638	-0.00464317	-0.0046011	-0.00286821	-0.00160022	-0.00582253	-0.000629527	-0.00120702	0.00262488	0.00185272	0.000501192	-0.000398266	-6.33849e-05	-7.27697e-05	-0.000511281	-0.000333825	-0.000274209	-9.8667e-05	-0.000459246	0.000122742	0.000111414	-9.86264e-05	1.17209e-05
MR0063_TraceCoords	G33	0.144662	-0.00791526	-0.00314716	0.00839455	0.0192786	0.00149335	9.26626e-05	0.00321181	0.000133867	-0.00156502	-0.000282509	-0.00106411	0.000665045	-0.000928929	7.3144e-05	-0.000197284	0.000558925	-0.000617974	0.000413459	0.000491959	6.93359e-07	-3.89667e-05	-0.000146024	8.96899e-06
MR0065_TraceCoords	G33	0.00840521	-0.0127878	0.000545814	-0.000751844	-0.00550852	0.0064159	-0.00481449	-0.000294642	-0.00287884	-0.00382674	-4.1639e-05	-0.000355475	0.00122621	-3.36609e-05	0.000851208	0.000361946	-6.99604e-05	-0.000299204	0.000178355	-0.000149597	-0.000103756	-0.000200896	1.51775e-05	-1.20224e-05
MR0066_TraceCoords	G33	0.0511879	-0.026407	0.00177811	-0.00830805	-0.000166628	0.00901346	-0.00776116	-0.00118948	0.000277218	-0.00367721	-0.00240937	0.000867426	-0.000928014	0.000191127	0.00217632	0.00198535	0.000852435	-0.000711846	-0.000354319	0.000173038	-8.01026e-05	-0.000186123	-0.000436575	-1.8602e-05
MR0067_TraceCoords	G33	0.0264938	0.0215742	0.00271583	-0.00298687	-0.00214344	-0.0109316	-0.00224575	-0.00677746	0.00407129	-0.000960891	0.00456544	-0.00242896	-0.00163633	-0.00065006	0.000351297	-0.000689193	-0.000775206	-0.000120614	4.69209e-06	0.000102167	-6.95828e-05	0.000248731	-0.000247322	1.65349e-05
MR0068_TraceCoords	G33	0.130759	-0.020425	0.000160429	0.00890602	0.0156533	-0.000804847	0.00184102	0.00572917	0.00287463	-0.00212842	-0.00057568	-0.00456211	4.39289e-05	-0.000460679	0.000317426	-9.29226e-05	0.000519505	-0.000376918	0.00135008	0.000230209	0.000275919	-0.000184366	-0.000157684	1.3761e-05
MR0069_TraceCoords	G33	0.156679	-0.0193936	-0.0306481	0.0091444	0.0146155	0.0059088	0.0134435	0.00710843	-0.00403423	-0.00504733	-0.00147873	-0.00022151	0.00115089	0.00500666	-0.00065872	8.96563e-05	0.000655418	0.00306688	0.00154594	-0.00107589	-0.000810706	-0.000711353	0.000501551	7.47201e-06
MR0070_TraceCoords	G33	0.0341754	-0.00661287	-0.00182841	-0.0137858	-0.00336832	-0.00307119	-0.00167097	-0.00162072	0.000870001	-0.000123836	-0.00198699	-0.000713089	0.00140232	-8.3571e-05	0.000570942	0.000801871	0.000151189	-0.000247277	-3.00029e-05	0.00021821	7.65811e-05	0.000114146	-6.4848e-05	-4.86975e-06
MR0073_TraceCoords	G33	0.109056	-0.0588446	-0.0182834	0.0121091	0.00595751	0.00409212	0.00713399	-0.00211671	0.00462238	0.000221654	-0.00134098	-0.00642931	0.000189787	0.00393559	0.000433675	0.00161077	0.00124282	0.00201019	0.000175206	0.000564363	0.000571783	0.000577674	0.000300035	8.82387e-06
MR0078_TraceCoords	G33	0.125265	-0.0026542	-0.0301422	-0.0201085	0.0072396	-0.00256181	0.0058494	0.000889939	0.00337502	-0.00273948	0.000442029	0.00213434	0.00281428	0.000903377	-0.00176321	0.00268591	-0.00171113	0.00172885	0.00076971	0.000525705	-0.000746975	-0.000191543	-2.14307e-05	1.10155e-05
MR0079B_TraceCoords	G33	0.0479651	-0.004576	-0.0134793	0.00346071	-0.00697824	0.00117014	-0.00150864	0.00270074	-0.000185708	0.00149032	0.000647774	-0.000221884	0.00125232	-9.32457e-05	0.000418092	0.000293483	0.000731142	0.000144022	0.000418287	-0.000151184	5.85337e-05	1.04021e-05	7.79176e-05	-4.46004e-06
MR0081_TraceCoords	G33	0.0234988	-0.00318996	0.0037078	-0.00661638	-0.00312125	-0.00564481	0.000497098	-0.00324332	-0.000152313	-0.0012027	0.00120028	-0.00167042	0.00113401	-0.000425783	0.00132103	-0.000433424	-0.00063997	-0.000411569	-1.48412e-05	4.41408e-05	-0.000122409	0.000152738	0.000230302	-6.48092e-06
MR0082_TraceCoords	G33	-0.108212	-0.0264105	-0.00899028	0.00315786	0.00581752	-0.00419528	-0.00271234	-0.00243599	-0.0020286	0.00247799	-0.000986458	0.00145718	-0.000322464	-0.000527427	-0.000615562	-0.00127778	-0.000279313	0.000180296	0.000412387	0.000156405	-0.000209086	-0.000198	-8.36272e-05	1.05086e-05
MR0085_TraceCoords	G33	0.0430713	0.00470966	0.00942004	-0.00424724	1.9185e-05	0.00185368	-0.000357711	-0.00147015	0.00469346	0.00058213	0.000474521	0.000544178	-0.00218331	-0.00267516	0.00120523	0.001326	0.000882772	-0.000766201	4.84286e-05	0.000978889	-0.00026278	-0.000131135	-0.000208108	1.96042e-05
MR0086_TraceCoords	G33	-0.00745026	0.00263062	-0.0131487	-0.00315315	-0.0106621	0.0103152	0.00499984	-0.00305774	0.0044491	-0.00104026	0.00263785	-0.000439051	-0.000255769	0.000977219	-0.00144228	0.000790276	0.000502981	0.000264164	-0.000347231	0.000589142	3.20834e-06	0.000312822	-8.38804e-05	-1.1902e-05
MR0088_TraceCoords	G33	-0.00886889	0.0441762	-0.010625	-0.0011813	-0.00649063	-0.00504947	0.00443218	-0.00176545	-0.000203014	0.00111111	0.00187261	0.000767803	0.000806593	-0.000305649	0.000738251	0.000856794	-0.000470761	-6.62058e-05	0.000618779	0.00015481	0.000115304	-0.0003329	-0.000205962	2.13473e-05
MR0089_TraceCoords	G33	-0.100999	-0.0319863	-0.029191	0.00638661	-0.00194597	0.00570809	0.00322518	0.00220385	0.00175808	-0.00200782	0.00135789	-0.00144697	0.000324079	-0.00081479	0.000186691	0.000297962	-0.00042422	7.80454e-05	-0.00128766	7.08448e-05	-0.000525973	-0.000299911	3.87104e-05	1.576e-05
MR0090_TraceCoords	G33	-0.076143	0.00766731	0.00617325	-0.0027659	0.00265383	0.00418697	-0.00779348	-0.00078756	-0.00115417	0.00274692	0.00177742	0.000329054	-0.00218711	0.000830016	-0.000376929	-0.000321904	-0.000620222	0.000190972	0.000715498	-0.000109368	-0.000156653	0.000169585	-4.69311e-05	1.22998e-05
MR0091_TraceCoords	G33	0.131115	0.0100347	-0.0120514	-0.0014736	0.0128031	0.0021825	-0.00191044	-0.0032783	0.00177087	0.000502708	0.00405231	0.00211452	-0.000175717	0.000733363	0.000268138	-0.00100756	0.000390316	-0.000256049	-0.00072489	0.000692394	0.000183526	0.000157978	0.000306465	1.72152e-05
MR0092_TraceCoords	G33	0.0826135	0.0406638	-0.0119349	-0.0175051	0.00343721	-0.000815784	0.00206098	0.00298446	-0.0050329	-0.00184584	0.00433203	0.00443694	-0.000248672	-0.00173406	-7.7785e-05	0.000276201	-0.000541871	0.000622169	-0.000389848	-0.000514956	0.000352507	-0.000369767	-0.00014866	1.38563e-05
MR0093_TraceCoords	G33	0.0560518	-0.0291844	0.00174487	0.0024061	-0.000472371	-0.00232976	-0.000544355	0.00095911	-0.00228445	-0.0039941	0.00114309	-0.0025632	-0.000349585	5.50887e-05	-0.000852224	0.000937729	0.000857847	-6.39568e-05	0.000376606	-0.000152371	0.000171425	-0.00039409	0.000149992	4.30862e-06
MR0094_TraceCoords	G33	0.0115563	-0.0109671	0.00115034	-0.0162035	-0.00313648	0.00191584	-0.00873634	0.00271272	0.000371572	0.00207661	0.000615687	-0.0018972	0.000345219	-0.000383411	0.00226304	0.000181104	-9.04672e-05	-0.000118782	0.000234962	-0.000526196	-0.000201471	0.000159026	5.43515e-05	-6.34114e-06
MR0102_TraceCoords	G33	0.0601816	-0.0209253	0.00621643	-0.00166512	0.000948964	0.00391877	0.000802051	-0.000277966	-0.00262562	0.00175129	-0.000959116	-0.00080134	0.000612726	-0.000822688	-5.54622e-05	0.000514987	0.000597148	0.000435922	8.54546e-05	-0.000206281	5.61315e-05	0.000217464	-1.55735e-05	1.51318e-05
MR0105_TraceCoords	G33	-0.0277847	-0.0150876	0.00263393	-0.00363142	-0.00462998	0.0140224	-0.00369439	0.0037285	0.00118595	0.000837489	-0.00163589	-2.83461e-05	-0.000437335	0.000614009	7.98017e-05	0.000241945	-0.000443732	-4.86108e-05	0.000205099	0.000113402	0.000226203	-0.000172363	0.000122107	-2.55746e-06
MR0106_TraceCoords	G33	0.0327483	0.0224701	-0.00434298	0.00337149	-0.00527718	-0.00685561	0.00332337	0.00645456	0.00185565	-0.00207515	0.00056018	0.000605352	-0.00192725	-0.000337264	-0.000345013	0.000649604	-0.0010877	0.000540382	0.000436208	0.000240226	-2.67981e-06	9.28814e-05	-0.000162971	-2.48541e-06
MR0107_TraceCoords	G33	-0.0188118	0.0110536	-0.0160261	-0.00125885	-0.00985024	-0.0012809	-0.000898432	0.000185955	0.00202926	-0.00193998	0.00102162	-6.00442e-05	-0.000418929	-0.000640886	-0.00101146	0.000141309	0.000219518	-0.000195541	0.000204711	-0.000100465	-3.52792e-05	8.00282e-05	0.000184403	-9.14248e-06
MR0108_TraceCoords	G33	0.0829014	0.0206202	-0.0111804	-0.00421279	0.00199402	-0.00698877	-0.00774325	-0.00475395	-0.000300674	0.00128377	0.00184663	0.00140608	0.00106447	0.000162094	0.000302683	3.36869e-05	-0.000474652	-0.00101017	-0.000384557	1.58027e-05	0.000104715	0.000191789	0.000361824	9.62523e-06
MR0109_TraceCoords	G33	-0.0576848	-0.0253964	0.004767	-0.00749182	-0.000497781	-0.00216745	0.0102521	0.00429182	0.00222788	-0.000851312	-0.00324852	0.00429046	0.000859728	0.00318661	0.00024582	-0.00170046	0.000778601	-0.000572187	-0.00111031	0.000101261	0.000221157	7.90507e-05	6.08058e-05	1.17457e-05
MR0110A_TraceCoords	G33	0.0263685	-0.0117839	0.00726166	-0.00515024	-0.00173875	-0.0112439	0.00557026	0.00194676	-0.00129898	0.00419687	0.00255669	0.00116889	0.00093866	0.000237731	-0.000426838	0.000336746	-0.000115785	-0.000523635	0.000511582	9.9416e-05	0.000112666	-7.815e-05	1.91642e-05	-3.50051e-05
MR0112_TraceCoords	G33	0.108997	0.000211612	-0.0155253	-0.00141877	0.00463706	0.00282876	0.0020381	-0.00146757	-0.00374191	0.00201555	0.00281339	0.00211529	0.00175174	0.000578552	0.000420001	-8.99217e-06	0.000150486	-0.000177497	-0.000775785	-0.000190349	6.5894e-05	0.000259605	0.000470232	-1.38332e-05
MR0115_TraceCoords	G33	0.0158935	-0.0157094	0.00670488	0.00481395	-0.00422383	0.00348354	0.00449525	-0.00303658	0.000749622	-0.000173248	0.00165018	-0.000269512	-0.00260017	-0.000601087	6.80872e-05	3.18151e-05	0.000677421	0.000315787	0.000237403	0.000149443	0.000341648	2.23163e-05	3.01737e-05	-3.56032e-06
MR0118B_TraceCoords	G33	0.0823902	0.00986707	-0.00509313	0.00407134	0.000993481	0.00329144	-0.00146433	0.00412647	0.00055837	0.0037509	-0.00124624	-0.000296121	-0.000540039	8.14749e-05	-0.000793164	-0.00161684	0.000310098	0.00029547	-9.27539e-05	-0.000548502	-5.01533e-05	3.44283e-06	-0.000313112	-1.50341e-05
MR0119_TraceCoords	G33	-0.00298241	-0.00487991	0.0108459	-0.00479241	-0.00222963	0.00444605	-0.00563958	0.00115523	0.00245881	0.000699004	0.000241799	0.000192692	-0.000919601	-0.000348731	-0.00052891	0.000188975	9.72269e-05	-0.000292984	0.000367496	0.00016117	-7.42188e-05	-2.34028e-05	5.10932e-05	2.4043e-06
MR0120_TraceCoords	G33	0.0154988	0.0207544	0.00468937	-0.0143762	-0.0022856	-0.00159965	6.54439e-05	0.000353479	-0.0026073	-0.00205386	-0.000172868	-0.000241036	0.00122385	-0.00106553	-0.000440436	-0.000232086	-0.00012494	7.6642e-06	3.10205e-05	-0.000190398	5.67655e-05	-7.16485e-05	-8.50341e-05	2.28201e-05
MR0122_TraceCoords	G33	-0.0950161	0.0258005	-0.0130559	-0.00644492	0.00306923	-0.0154158	-9.90052e-05	-0.00164776	-0.000791823	0.00381139	-0.00208933	-0.00121812	0.000149385	-0.00178069	-0.000926394	-3.88727e-05	0.00167487	8.09186e-05	-5.35297e-05	0.000463196	0.000412433	-0.000643226	0.000245873	1.96585e-05
MR0123_TraceCoords	G33	0.0318713	0.0247041	0.00417347	-0.00890585	-0.001726	0.000103891	-0.00139365	0.000167631	0.00180985	-0.000152002	-0.00119686	4.73648e-05	0.000210127	-0.00118455	0.000636989	0.000152882	-0.00027387	0.000333946	-4.59007e-05	-9.18948e-05	-0.00013015	0.000281242	-5.74047e-05	-2.37322e-05
MR0124_TraceCoords	G33	-0.199069	0.0511238	-0.0148564	-0.0214562	0.04207	0.00507506	0.0100054	-0.00560798	0.00068572	-0.00360909	-0.00205854	-0.00597946	0.00038215	0.00480754	0.00101504	-0.00296908	0.000715762	-0.00169902	0.00224544	-0.000860185	0.000476462	0.000703328	-0.000366248	-1.11863e-05
MR0125_TraceCoords	G33	0.0818379	0.0026346	0.0103974	0.00895875	0.00608077	-0.00780911	-0.00275538	0.00429292	0.000187896	-0.00130021	-0.00217568	-0.00263971	-0.00175298	-0.00052559	0.00014122	0.000517718	-0.000625369	0.000256206	0.000327528	0.00036391	0.000367393	0.00016222	2.65377e-05	1.05877e-05
MR0126_TraceCoords	G33	0.0405368	-0.0285538	0.0197997	0.00019728	0.00355917	-0.00615592	0.00379908	0.00326687	0.00412258	0.00304122	-0.000100203	0.000600309	-0.00114893	0.00100237	-0.000631769	-1.30684e-05	0.000140689	-5.11352e-05	0.000563219	0.000230749	0.00026792	-0.00011778	0.000226209	-2.08687e-05
MR0130_TraceCoords	G33	-0.0263629	-0.0638199	0.0108697	0.0334608	0.00247389	-0.0138951	0.0112956	-0.000317925	0.00175106	-0.00111249	0.000417248	0.00605806	-0.000875897	-0.00172939	-0.00197164	0.00174543	-0.000422489	-0.000262961	-0.000821665	-0.00102657	0.000128735	0.00145374	0.000611168	-1.69996e-05
MR0131_TraceCoords	G33	0.0413366	-0.0057088	0.00828988	-0.00428335	-0.000464584	-0.00446709	-0.000806506	-0.000470665	0.000525337	-0.00270952	-0.00232176	-4.48039e-05	-0.000292283	-0.000492255	9.08855e-05	0.000219869	-3.47449e-05	7.07536e-05	0.00021265	0.000278898	-4.68674e-05	9.88092e-05	-9.89307e-05	-2.04511e-05
MR0132_TraceCoords	G33	-0.0131347	-0.0192534	0.000569199	-0.0103521	-0.0048632	0.00629491	-0.00125402	0.00162688	-0.00339553	-0.00149674	-0.000334466	-0.000156494	0.00106238	0.000134494	-0.000386986	0.000154219	-0.000109063	-0.000159332	0.000389286	0.000149167	-0.000329627	0.000132092	8.07446e-05	1.19068e-06
MR0133_TraceCoords	G33	-0.0149074	0.00962161	0.00138609	-0.0108025	-0.00471479	0.00381229	-0.000700649	0.00126956	-0.00160679	0.000817705	-0.0019257	-0.000166377	-0.00133298	-9.58495e-06	-2.93125e-05	-2.30889e-05	-0.000429072	-0.000198407	-9.05904e-05	-2.92152e-05	-0.0001212	4.75205e-05	-1.28243e-05	1.20577e-05
MR0135_TraceCoords	G33	0.0500506	-0.0357336	0.00367272	0.00225801	-0.000267857	2.5188e-06	-0.00122523	-0.00176721	-0.000481055	-0.00243091	0.00149302	-0.00157378	6.27142e-05	0.000602194	0.000418293	0.000638769	0.000422343	0.000355729	8.81864e-05	4.78989e-05	1.03572e-05	-0.00016277	0.000251812	-1.28425e-05
MR0137_TraceCoords	G33	0.0903362	0.00871479	-0.0110456	0.00762734	0.00188902	-0.00811114	-0.00578039	0.00335223	-0.000845935	-0.00168722	0.00388578	-0.00140937	0.00187115	0.00141159	0.00071243	-0.000298881	-0.000298108	-0.000545125	0.000110355	8.90175e-06	0.00040452	0.000417813	-0.000119208	1.42425e-05
MR0138_TraceCoords	G33	0.0761455	0.0120022	0.0103625	-0.00222921	0.00530907	0.00153372	-0.0022205	0.00171646	-0.00196586	-0.000325626	0.00196287	1.12302e-05	-0.00149963	-0.000952133	0.00101306	-0.000438202	-0.000461315	0.00101773	0.000176504	-0.00061664	-1.89249e-05	-2.19473e-05	0.000478648	-4.35517e-05
MR0140_TraceCoords	G33	-0.00956992	-0.0151071	0.0188004	0.00476	0.000216487	-0.00833921	-9.88833e-05	-0.00036151	0.00313263	-0.000279217	0.00116037	0.00265662	-0.000613133	0.00183133	0.000139162	-0.00200509	0.00163347	0.00103837	-0.000861788	-0.00062227	0.000305802	0.000123253	0.000508363	2.63244e-05
MR0141_TraceCoords	G33	0.040895	0.0264518	-0.00137954	0.0237381	-0.0044627	-0.00386015	0.00349728	0.00189935	-0.00526502	-0.000958481	0.00172703	-0.000369896	0.00264616	3.93677e-05	-0.000476201	-0.00117551	3.37182e-05	0.000583307	-0.000395209	0.000117768	0.000217384	0.000577744	8.45956e-05	3.20839e-06
MR0142_TraceCoords	G33	0.0302719	-0.00429461	0.00545501	-0.00674231	-0.00236445	-0.00144197	-0.000704291	-0.000950751	-0.00129825	0.000234683	-0.00104604	-0.000476769	-0.000115629	-0.00049853	-0.000329492	-0.000156386	-0.000384465	-6.96896e-05	-0.00020183	-0.000183343	-8.66805e-05	-9.96013e-05	1.76301e-06	-1.53214e-05
MR0143_TraceCoords	G33	-0.0683095	-0.0132858	-0.00383735	-0.00124655	-0.00197842	0.00148732	-0.00205801	-0.000188687	-0.00130011	-0.00392746	-0.000845878	6.52843e-06	-0.000776656	-8.61905e-06	-0.00159474	-0.000542965	-0.000143367	-7.60736e-06	-6.70361e-05	-0.000297876	0.000103912	0.000122046	0.000434818	-1.12457e-06
MR0144_TraceCoords	G33	-0.0280847	-0.023894	-0.00201338	0.00228223	-0.00530515	-0.00147921	-0.00306895	0.00203771	0.00113134	-0.000761105	-0.00124394	-0.00107057	-0.00172318	0.00061308	0.000942237	1.06266e-05	-0.000105074	0.000272729	-0.000127012	-4.13521e-05	0.000472147	-9.24447e-06	-0.000221478	-1.4325e-05
MR0145_TraceCoords	G33	0.00235822	0.00700361	-0.00113489	-0.00984598	-0.00598588	0.00230006	0.0028089	0.00123073	0.00252564	-0.00173818	-0.00218225	0.000295129	0.000476634	-0.000824075	-0.000871422	9.67018e-05	-0.000114614	0.000168232	0.000368803	-2.11596e-05	0.000176965	9.50996e-05	8.19194e-05	-7.82335e-06
MR0148_TraceCoords	G33	0.0365728	0.00775058	0.00176156	-0.0150387	-0.0021677	-0.000869528	0.000175565	-0.0032742	-2.14701e-05	-0.000612465	-4.53672e-05	-0.00074511	0.00103349	0.000176901	0.000555588	0.000423089	-0.000342016	-0.000174957	-0.000116936	0.000134803	-0.00028569	7.68528e-05	-0.000144307	-2.7146e-05
MR0151_TraceCoords	G33	-0.0997951	0.0550085	-0.00228926	0.00589117	0.00755859	0.000764805	-0.00395849	0.00103426	0.000360359	0.00269452	-0.0020173	-0.00241254	-0.00293878	0.00156031	0.000267432	0.00232806	0.000833486	0.000903706	-0.000118465	0.000336693	-0.0005837	-0.00017726	0.000632261	3.33825e-07
MR0152_TraceCoords	G33	-0.011697	-0.0143687	-0.00772548	0.0020068	-0.0076461	-0.00670314	-2.79395e-05	-0.000991301	-0.00135443	-0.000124306	2.58389e-05	-0.00151525	-0.000604438	-0.00040877	0.000511714	0.000351844	0.000295882	-0.000154952	0.000209639	-5.76017e-05	9.03506e-06	-0.000250507	-5.59261e-05	-5.6369e-07
MR0153_TraceCoords	G33	0.000548165	-0.0127375	0.0077966	-0.0101647	-0.00252685	-0.00646543	0.00281858	0.00300436	0.000497548	0.00200675	-0.000399837	0.000851359	-0.000293076	0.000892873	0.000624543	-8.94782e-05	-0.000395174	-3.42736e-05	2.1297e-05	4.17679e-05	-0.000193465	6.99915e-05	-0.000119783	-3.30894e-05
MR0155_TraceCoords	G33	0.00534238	0.0134741	-0.00396407	0.0154681	-0.00746899	-0.0118574	0.0181648	-0.00307622	-0.00218881	0.0040457	0.00361922	-0.00148714	0.0023014	-0.0030523	2.74563e-05	0.00161309	-0.000790663	-0.000746591	0.000934958	0.000543519	0.000177113	-0.000398388	6.32285e-05	-2.90698e-06
MR0158_TraceCoords	G33	0.0325599	-0.0135588	-0.00151156	-0.00639863	-0.00515487	0.0146897	0.000532847	-0.000774296	-0.000969843	-0.00190095	0.00331771	-0.00139945	0.00135757	3.65086e-06	0.000623509	0.000105688	0.00100649	0.000560005	9.81644e-05	0.000225451	-0.000456378	-2.82627e-05	0.000105313	7.60411e-06
MR0159_TraceCoords	G33	0.0284933	0.0196543	0.000322534	0.0096786	-0.00542595	0.00468158	0.0030779	0.000546233	-0.000757605	0.000159162	0.000505327	0.000584659	0.0014107	-0.00078936	-0.00115014	-0.000531818	-8.72147e-05	-0.000474158	-0.000385373	-0.00111189	-2.73877e-05	0.000589821	-0.000345701	-1.24713e-06
MR0165_TraceCoords	G33	-0.0432214	0.0321882	0.0116561	-0.0176127	0.00579932	-0.0345159	-0.00274183	0.00797162	-0.000822242	-0.0057223	0.00264005	0.00108333	0.00554798	0.000780709	-0.00231364	0.0013345	0.00137188	0.00201936	-0.000665466	0.00225579	0.00172001	0.000571508	-0.00108792	-3.08941e-05
MR0167_TraceCoords	G33	-0.0699701	0.000730622	-0.000756003	-0.00789556	-9.25536e-05	0.00312736	-0.00522654	0.00328272	-0.00608332	-0.00269447	0.000354848	-0.000931435	4.29372e-05	0.000181953	-0.000340812	-0.00107235	-0.000675769	-0.000615651	4.30966e-05	6.08058e-05	0.000181449	-4.1978e-05	-1.33916e-05	5.26738e-06
MR0171_TraceCoords	G33	0.0512488	0.0119904	0.0187511	0.00102465	0.00404469	0.00370286	-0.00739713	0.00240954	-0.00171734	0.0022586	-0.00422039	-0.000716323	-0.00163779	-0.000739854	2.51688e-05	-7.67634e-05	0.000553721	0.000711891	-0.000145467	-0.000384011	-0.000133056	-7.44597e-05	-0.000132711	-9.89235e-07
MR0179_TraceCoords	G33	0.0285756	-0.0111956	0.00593254	-0.00178868	-0.00291266	-0.000218862	0.00125533	-0.00143608	-0.00071116	0.000212829	0.000371759	-1.13005e-05	-0.00221431	-0.000220741	-0.0013694	3.71676e-05	0.000149752	-0.000204402	4.45804e-05	3.1258e-05	1.40854e-05	-3.02688e-05	-0.000151031	-3.59554e-06
MR0180_TraceCoords	G33	0.0061172	-0.00228217	0.00721008	0.00124574	-0.00436009	0.000501211	0.0036892	0.00096056	0.000129795	0.00141181	-0.00103101	-0.000563779	-0.000501903	0.000250847	0.00127634	0.000511828	-7.00493e-05	0.000180035	0.000153856	-0.000237708	0.000155796	-0.000102506	-4.1319e-05	2.67675e-05
MR0182_TraceCoords	G33	-0.103532	-0.0245333	-0.0114794	0.00160813	0.00282631	0.012067	-0.00215876	0.0026244	-0.00132376	-0.00207772	-0.00108916	0.000788371	-0.00236499	0.000769533	-0.00107231	0.000288531	-0.00107675	-0.000625389	-0.000204299	0.000267689	-6.05319e-05	0.000116269	0.000312819	1.23625e-05
MR0184_TraceCoords	G33	0.104376	0.00225496	-0.0162046	0.00369	0.00256872	0.000894146	0.0036117	0.00116355	0.00226643	0.00277218	0.00145439	0.00078091	0.00196295	0.00111898	3.2874e-05	-0.000487355	-0.000448342	0.000348927	0.000759983	0.000139229	0.000259645	0.000437182	0.00026258	8.70641e-06
MR0188_TraceCoords	G33	-0.017329	-0.0228283	-0.00192984	-0.00891794	-0.00506114	-0.00298617	0.00236928	0.00302533	-0.00137816	0.00625455	0.00293616	9.0822e-05	0.000548592	0.000535626	-0.00061955	0.000549865	-0.000783254	-0.000164741	0.000129227	0.000317845	8.13612e-05	9.65008e-06	-0.000103685	-9.74038e-06
MR0189_TraceCoords	G33	-0.0452798	0.0518918	-0.0190954	-0.00318834	-0.00479413	-0.00593147	-0.00326421	-0.0036571	-0.00188915	0.000958506	0.00209085	0.000804979	0.000732613	-0.00102323	-0.000461846	0.000145405	0.00149459	-8.14691e-06	0.000624309	-0.000432405	0.000376631	-1.19398e-05	0.000272677	-1.08362e-05
MR0191_TraceCoords	G33	-0.058565	-0.0346936	0.0100038	0.00632502	0.000992557	0.00317681	0.00445773	0.0010588	-0.000865124	-0.000457266	0.00209908	0.00272574	0.000179259	0.000904352	-3.94969e-05	0.000115755	-0.000317741	-0.000291023	4.06808e-06	9.22383e-05	-5.45844e-05	0.000231156	-1.02204e-05	-8.35198e-06
MR0192_TraceCoords	G33	0.0756084	-0.0155457	0.00918192	-0.000539719	0.00423699	0.000871698	0.00266468	0.00168359	-0.000473297	-0.00129638	-0.00147281	-0.000591876	-0.000643449	1.97174e-06	-0.000819149	-4.70144e-05	0.000277408	0.000138796	-4.3424e-05	0.000114301	-0.000161689	-0.000599166	-0.000237716	-1.63606e-05
MR0193_TraceCoords	G33	0.0457067	-0.0354273	-0.0142792	0.00334098	-0.00599998	-0.000699769	0.00131904	-0.00377314	0.000378833	-0.000893273	-7.87163e-05	-0.00109028	-0.00199697	0.000458984	0.000755064	0.00172586	0.00100299	-9.25941e-05	-0.000279486	0.000484368	-0.000634777	6.9031e-05	-0.000254141	1.56637e-05
MR0194_TraceCoords	G33	0.0851927	0.00979609	0.00669718	-0.00170062	0.00608472	0.000815668	-0.00185907	-0.00164071	-0.00176756	0.00170981	0.00106327	-0.000993165	-0.000418677	-0.00145413	-0.000917916	-0.00123465	0.000171239	-0.000518806	-0.0003049	-2.32572e-05	0.000142125	-3.53544e-05	0.00016203	-1.25519e-05
MR0203_TraceCoords	G33	0.1166	0.00462879	-0.000362736	0.0100711	0.0104366	0.00453431	0.00141693	-0.00298858	0.00238895	0.00391727	-0.00102883	-0.000104904	0.000496778	7.42375e-05	-0.000262216	-0.00217921	-1.41618e-05	-0.000372581	-0.00014277	0.000233161	0.000100003	0.00029065	0.00012318	-6.82776e-06
MR0207_TraceCoords	G33	-0.0936976	0.0166546	0.0127979	0.00129529	0.00804449	-0.00271628	-0.0035556	-0.00131732	-0.000494325	-0.00470951	-0.000927394	0.000386509	0.000813708	0.000637395	8.78513e-05	0.000125001	0.000180328	0.000504092	-3.89096e-05	-1.30146e-05	0.000437372	0.000267662	-0.000129401	-2.20876e-05
MR0209_TraceCoords	G33	0.00510131	-0.0120476	-0.00207613	-0.0038427	-0.00550268	-0.00634567	0.00103327	-0.00423188	0.00170893	0.000523439	0.00189692	-0.002791	-0.00106191	-0.0011493	0.000936201	-0.00269307	-0.00133984	0.000362617	-0.00105947	-0.000802793	-0.000844903	-3.69291e-05	-0.0005644	-6.59929e-06
MR0210_TraceCoords	G33	0.00581751	-0.0445258	0.00498926	-0.0130502	-0.000594387	-0.000939685	-0.00106915	-0.00798964	-0.00711419	0.000133327	0.000586893	0.00387457	-0.00163625	0.00219398	-0.00218392	5.48923e-05	-0.000308039	0.000392481	-0.00033536	0.000254289	-0.00021455	-0.000474309	-9.94067e-05	3.63225e-05
MR0212_TraceCoords	G33	0.0408492	6.08193e-05	-0.0210133	0.00537489	-0.0098374	-0.00120421	0.00067842	0.00218975	0.000439137	-5.33607e-05	-0.00340877	0.00136623	0.00190685	0.00048116	8.17875e-05	0.000802407	-0.000493293	-0.000131411	0.000536404	-0.000124538	-0.000267357	-2.95445e-05	-6.66933e-05	-7.18916e-06
MR0213_TraceCoords	G33	-0.0191632	-0.029752	0.006166	-0.0115576	-0.000715661	-0.0041132	-0.00902474	-0.00109116	0.00410199	0.000928755	-0.00056622	0.000308887	0.00267731	-6.42795e-08	0.00167403	-0.00109082	0.000108451	-6.18805e-05	-0.000214787	-2.31838e-05	-0.000374606	-1.384e-05	-0.000109462	7.72453e-06
MR0215_TraceCoords	G33	0.0372692	-0.0147255	-0.0161714	0.00624862	-0.00979958	0.00547947	0.00644461	0.000536573	-0.00610299	-0.00212729	0.00317923	-0.00230353	0.00229499	0.00120196	-0.000854606	0.000193159	0.00102212	0.000962427	-0.000131022	-0.000447751	-6.40927e-05	-0.000271148	0.000477565	-1.53089e-05
MR0216_TraceCoords	G33	-0.0378516	-0.0177831	0.00180972	-0.00415874	-0.00390158	0.00858648	-0.00207218	0.00443106	-0.00179695	-0.00188711	0.000416341	-0.00049055	0.000894162	0.000321215	0.000375011	-0.00011802	-0.000202329	-0.000168278	-0.000232497	-3.73447e-05	0.000324688	-0.000195599	0.000131878	4.43465e-06
MR0218_TraceCoords	G33	-0.0321318	-0.0155148	-0.00997089	-0.00329635	-0.00680219	-0.00237519	-0.00404639	0.00465315	-0.00300468	0.000549317	-0.00262046	-0.00159105	0.00158958	0.000132102	0.00220063	-0.000344692	-0.000513731	-0.000414325	1.23993e-05	-0.000260918	0.000159779	-0.000455805	-0.000212107	2.19822e-05
MR0219_TraceCoords	G33	0.0429794	0.0167256	-0.00539182	0.00498947	-0.00520404	0.00637101	-0.00208029	0.00042378	-0.000791094	0.00151599	0.00220759	0.00132136	0.000748819	0.000219855	0.00146726	-0.00125353	0.000498497	-2.25485e-05	-0.000138725	-0.000325674	-1.06788e-05	3.20876e-05	-1.26391e-05	-3.38548e-06
MR0221_TraceCoords	G33	-0.0139311	0.00426624	0.00566261	-0.0129486	-0.00255877	-0.0108515	0.00125441	0.00200844	-0.00109822	0.00180447	0.000426423	0.000287937	-0.00085288	0.000481278	-0.000649572	0.000912101	-0.000857415	0.000211731	0.000313338	-0.000493931	-0.000321274	2.00476e-05	0.000423683	-1.11976e-05
MR0222_TraceCoords	G33	-0.0696506	-0.000403356	-0.0160305	0.00589691	-0.00405755	-0.0093634	-0.009293	0.00256133	-0.00440991	-0.004041	0.000899224	-0.00200414	-0.000889433	-0.00148762	-1.16157e-05	0.000386904	0.000434493	3.44659e-05	-0.000304025	0.000124921	0.000430702	-4.06925e-05	-0.00020402	9.83093e-06
MR0223_TraceCoords	G33	-0.0848581	-0.0373014	0.000194913	0.00398498	0.0040263	-0.000182442	-0.00816276	-0.000851743	0.00188744	-0.000352905	0.00063786	0.00200199	0.00182283	0.000191956	0.00158738	-0.000648227	-0.00114391	0.00086811	-7.55508e-05	0.000139057	4.05857e-05	-0.000450044	-0.000181285	-8.19564e-06
MR0224_TraceCoords	G33	-0.0950876	-0.00536777	-0.0125287	-9.69297e-05	0.000309488	0.00289091	-0.000842948	-0.00380411	-0.000879383	0.000842981	0.00124404	-0.000851152	-0.000186562	-6.06307e-05	-0.000516527	-0.000151765	6.77465e-06	-6.84044e-05	7.19206e-05	-4.19746e-05	-2.87589e-05	5.53177e-05	-0.00017679	-2.9841e-07
MR0225_TraceCoords	G33	-0.0297581	0.000699838	0.00371108	-0.0120555	-0.00361537	0.00515017	0.000928464	0.00439428	-0.0010551	0.00100306	-0.00093186	-0.00104336	0.000625141	0.000138424	0.000749879	-0.000552783	-0.000431584	-0.000112194	-6.83907e-05	-7.58924e-05	0.000204308	0.000238878	0.000170047	-1.2485e-05
MR0226_TraceCoords	G33	-0.00306439	-0.0237194	0.000442655	-0.00804657	-0.00473116	0.00593612	-0.00415594	-0.000144772	0.000589829	0.000637531	-0.000342503	-0.00145556	0.00198326	-0.000128134	0.000530081	-0.000320375	0.000102739	7.93709e-05	-0.000123614	-0.000235062	-0.000160591	0.000228749	-0.000218905	7.11685e-06
MR0230_TraceCoords	G33	0.0367594	-0.012104	-0.0214016	-0.00993346	-0.00977556	0.00508213	0.00233648	-0.006379	0.000294769	-0.00111703	0.00303093	-0.00136484	0.00258163	0.00215526	-3.08344e-05	0.00095745	0.000613113	0.00145011	-0.000584625	0.000782071	-0.000408436	0.000197138	0.000253882	3.00535e-07
MR0231_TraceCoords	G33	0.0559237	0.0366939	0.00329206	-0.00971865	0.001492	0.00325123	-1.45844e-05	0.00280556	0.000735939	-0.00169723	-0.00218081	0.00163111	-0.00210128	-0.000962506	-0.000702897	-0.000694757	-0.000394027	0.000791712	0.000120401	0.000123957	-9.51695e-05	-0.000226037	-0.000200607	-7.44536e-06
MR0232_TraceCoords	G33	0.0399408	-0.0304917	-0.00290694	-0.00455506	-0.00329339	0.00725417	-0.00601776	-0.00169857	0.000850435	-0.00160495	-0.000431533	-0.000554376	-0.00162782	0.000601813	-0.000393794	0.00106295	0.000956102	0.000336849	0.000224356	3.17944e-05	0.000226253	-0.000588975	-2.76258e-05	1.06154e-05
MR0233_TraceCoords	G33	-0.147867	-0.0505265	-0.0108583	0.0198281	0.0191398	0.0020962	-0.00657927	0.000197072	0.00234716	-0.00120087	0.00165723	0.00566663	0.00022829	-0.00178077	0.000481263	0.000916409	-0.0024395	0.00135939	-0.00061304	-0.000438919	0.000155455	9.99036e-06	-0.000181379	-1.86158e-05
MR0237_TraceCoords	G33	0.0517464	-0.0184509	-0.0157036	-0.0115252	-0.00581075	0.0125601	-0.00535425	0.00399971	0.00615249	-0.00174602	0.000227048	-0.00106634	-0.00128978	0.00109202	0.000594303	0.000771697	0.00126424	0.00048651	0.000385339	0.000583241	-0.000497436	3.03434e-05	-5.43543e-05	-2.54732e-06
MR0238_TraceCoords	G33	-0.0123927	0.0206962	0.00863393	0.0181406	-0.00387496	-9.63677e-05	-0.00109287	-0.000243288	0.000837423	0.00220338	0.000343457	-0.00124775	0.0015406	-0.000438615	0.000275475	0.000164187	-0.000329308	0.000361549	-0.000481936	9.80263e-06	-8.64654e-05	2.69739e-06	0.000125226	-2.4002e-05
MR0242_TraceCoords	G33	-0.0828669	-0.0419669	-0.0133021	0.00136471	0.00103577	-0.0140471	-0.000505099	0.00246657	0.0019484	0.00336666	0.00132449	-0.000432732	-0.000896416	-9.96628e-05	0.000192494	-0.00210529	0.000222345	0.000648983	-0.000529069	-0.000322834	-0.000776155	-0.000111923	-0.000350019	-4.40223e-06
MR0246_TraceCoords	G33	-0.0975051	-0.0171188	-0.0099989	-0.00061119	0.00245275	-0.00742435	0.00366027	-0.000583178	-0.00121134	0.00128993	-0.00352488	0.000811613	-0.000835467	-0.000520888	0.00199014	-0.000533108	0.000383346	-4.54651e-06	0.000248369	0.00040598	-0.000141839	-0.000119038	4.50646e-05	-6.46621e-06
MR0250_TraceCoords	G33	-0.0630981	-0.0336136	-0.00623092	0.00561928	-0.00175418	-0.0097695	-0.00225912	-0.000146916	-0.000323359	0.00181486	0.00201606	-0.000917097	9.63572e-06	-0.000172104	-0.000139677	-0.000852798	-0.0002414	0.000374416	3.39359e-05	-9.91144e-05	-0.000709595	-1.51725e-05	-0.000296045	-1.10574e-05
MR0251_TraceCoords	G33	0.0706818	0.0058784	0.00510912	0.00709505	0.00134104	0.00713039	0.00148785	-0.00329602	0.00396347	0.00196606	0.00192595	-0.00170213	0.00338819	-0.00145073	0.00112185	-0.00158624	-0.000299469	-0.00024927	-7.49056e-06	0.000186908	-6.64968e-05	0.000350906	6.45518e-05	7.76554e-06
MR0252_TraceCoords	G33	0.00271011	0.0319324	0.00842253	-0.00553054	-0.00118319	0.000815548	-0.00710418	-0.00287674	-0.00398778	-0.00427656	-0.00116285	0.000929745	-0.00123333	0.000496889	0.000943527	-4.46425e-05	-0.000508358	0.000331705	-0.000181485	0.000253398	-3.33803e-05	-3.22524e-06	-2.04199e-05	-1.15302e-05
MR0254_TraceCoords	G33	-0.139385	0.0309168	-0.00571735	0.0121473	0.0153113	0.00446569	-0.00658729	-0.00238652	-0.00378549	-0.00585927	-0.00152993	0.000569696	-0.000999406	-0.000618336	-0.000252507	0.00196958	0.000174634	0.000345259	0.000406036	4.72912e-05	0.000953362	0.000365824	-7.6389e-06	-1.70453e-05
MR0258_TraceCoords	G33	-0.0324967	-0.0123637	-0.0153586	0.00110769	-0.00953343	-0.00233683	0.00653218	0.00372738	0.00457068	0.000710375	-0.0016322	-0.000370148	0.000550895	-0.00105057	0.00025906	0.00147898	-0.000148303	-0.000502158	-0.000231769	5.26609e-05	-6.28492e-05	5.98683e-05	-6.25046e-05	1.06234e-05
MR0259_TraceCoords	G33	0.0726659	0.00164784	0.0198259	-0.0222792	0.0101566	0.0109876	-0.00669438	0.0034275	-0.00286051	0.000981073	0.00112597	0.000501986	0.000754331	-0.00460002	0.000532053	0.00114087	0.00158419	0.000377651	-0.000641169	-0.000597711	-0.00070401	0.000297208	-0.000300878	1.85843e-05
MR0261A_TraceCoords	G33	-0.0177023	0.0325618	0.00309132	0.00747879	-0.00398753	-0.000344637	-0.00304853	-0.00346965	0.00295222	0.000535005	-0.00139144	0.000777408	-0.000630991	0.000171481	-0.00170353	0.000709451	6.68421e-05	-0.000218782	3.25939e-05	-0.000121301	-0.000272878	-0.000230874	0.000230866	1.47204e-05
MR0263_TraceCoords	G33	-0.0410739	0.00561852	0.00890223	0.00201368	-0.00204057	-0.00590296	0.00734322	-0.00153809	-0.000779733	0.000588303	0.00043625	-0.000453732	-0.000421502	-4.31952e-05	0.000297	2.39839e-05	1.78846e-05	-9.31433e-05	0.000118065	-2.47759e-05	-0.000249491	1.41609e-05	-6.62685e-05	-3.78277e-06
MR0264_TraceCoords	G33	0.0592505	0.0131893	0.00828195	0.00641397	0.001835	-0.00740474	-0.0032983	0.00077923	-0.00455188	-0.000292341	-0.00216317	-0.0014306	0.000673994	-0.000665964	0.00150616	0.000379923	-0.000207225	0.000331699	-0.000220885	0.000311633	0.000154244	0.00033228	3.92797e-05	-4.9736e-06
MR0265_TraceCoords	G33	-0.00754953	-0.0583512	0.00266353	0.00767927	-0.001813	0.0023715	-0.00264013	0.000346685	-0.000346495	0.00154074	0.00225759	-2.57825e-05	0.00159895	0.00138823	0.000763028	0.00092973	-8.20067e-05	0.000710274	0.000458357	0.000103511	0.00017029	-0.000245851	0.000218004	3.90218e-06
MR0267_TraceCoords	G33	-0.109066	0.00329604	0.00702219	0.00884716	0.00844594	0.00745491	-0.0018011	-0.00155136	-2.48509e-05	0.000894655	0.002127	0.0006845	-0.000296234	0.00028309	-0.00010937	0.00142377	-0.000828006	-0.00020904	0.000378654	-0.00010328	-7.71818e-05	0.000154859	4.5397e-05	5.86449e-06
MR0268_TraceCoords	G33	-0.00786544	-0.00705114	-0.00526608	-0.0069301	-0.00771434	0.00776795	0.00230722	0.00219933	-0.00354284	0.00118941	-0.0011358	-0.00107648	-0.00117851	0.00119501	0.000318337	4.68652e-05	-0.000283874	-9.61828e-05	-0.000429651	0.000307072	4.68524e-05	-1.79013e-06	0.000104855	-1.82177e-05
MR0269_TraceCoords	G33	0.00695078	0.00662868	0.00188913	0.00851282	-0.00625371	0.00252493	0.00278813	-0.00552117	0.000885933	-0.000928001	-0.000906962	0.00048442	-0.000798197	-0.000292219	-0.000549775	-0.000717462	-0.000424518	0.000121327	0.000113065	-0.000330997	-9.41739e-05	0.000306588	-8.00998e-05	-1.33778e-06
MR0271_TraceCoords	G33	0.0715874	0.00938572	0.0008915	0.00739594	0.000969679	-0.00236163	-0.00379072	0.0020758	-0.000267132	0.000433406	-0.00148464	-0.000120462	-3.21316e-05	0.000241678	0.000566815	0.000383517	-0.000484873	-0.000209064	-4.55194e-06	9.50559e-05	0.000206841	-0.000195647	-8.0919e-05	-5.66335e-06
MR0272_TraceCoords	G33	0.0488443	-0.021863	0.00356418	-0.0109799	0.000549892	-0.00648237	-0.00316252	-0.00293144	0.000688421	9.87112e-05	-0.00266893	-0.00101887	0.000298573	0.000611215	-0.000145946	0.000843904	-0.000116676	-0.00120973	-0.000159109	-1.04857e-05	-0.000269083	-0.000233375	-0.000293587	1.49931e-05
MR0275_TraceCoords	G33	-0.0502604	0.0330202	-0.0126052	0.00823437	-0.00642948	0.0058607	-0.000372181	-0.00376149	0.00577241	0.00242118	0.00261687	0.00145523	0.000162849	-0.00014182	0.00107622	0.000368266	0.00104831	-0.000350843	0.000161352	-0.000407696	4.5308e-05	-0.000498341	6.97983e-05	-1.50994e-05
MR0276_TraceCoords	G33	-0.00881431	-0.0172821	0.00324592	-0.00325986	-0.00419779	0.000495923	-0.00356736	-0.00395883	-0.00140529	0.00125687	0.00368383	-0.000245974	-0.00173313	0.00074568	-1.54583e-05	-0.000309659	-0.000156828	-0.000168401	0.000497452	0.000303001	-0.000331658	8.24272e-05	-4.92196e-05	-1.42815e-05
MR0277_TraceCoords	G33	0.0093976	-0.00991291	0.00248884	0.00972019	-0.00601141	0.00530285	0.000503576	0.000808357	-0.000141578	0.000540741	-0.00116844	0.000722238	-0.000787915	-0.000904252	0.000602325	0.000654786	2.63649e-05	9.93671e-05	6.88732e-05	0.000143301	0.000324543	-0.000167407	0.000123725	1.72425e-05
MR0279A_TraceCoords	G33	0.0816091	-0.0271907	0.00754481	0.0138513	0.00530718	-0.0017452	0.00257466	-0.00930631	-4.26194e-05	-0.000773831	-0.0028081	-0.00207263	-0.000659183	-0.00068724	-0.00176627	-0.00143748	-0.000219125	-0.000635997	-0.000130871	-6.48489e-06	-0.000147713	1.58216e-05	-0.000153428	-7.98124e-06
MR0280_TraceCoords	G33	0.0767807	0.00491134	-0.00560296	-0.00159225	0.000301924	-0.00446351	0.00151946	-0.000652047	0.00315908	-0.00099683	0.000977322	0.000566182	-0.00135281	-3.92746e-05	-0.00184458	-0.000328643	-0.000553018	0.000116802	0.000299582	0.000415589	0.000127269	-0.0001194	0.000139191	-1.70645e-05
MR0281_TraceCoords	G33	0.0978249	-0.00828392	-0.00447399	-0.00258656	0.00582495	-0.00819862	0.00157952	-0.00398502	0.000888459	-0.000621729	0.000771762	-0.00177808	0.000368689	-0.000807769	-0.00115161	0.000411783	-0.000902603	-0.000606446	-0.000257176	0.000195525	0.000210036	0.000111522	3.1522e-05	7.06067e-06
MR0283_TraceCoords	G33	0.104588	-0.0193978	-0.0023022	-0.00493584	0.00832224	-0.00270999	0.00101458	-0.00358693	-0.00156081	0.000213764	-0.00191886	-0.00144033	0.000115747	-0.000152007	0.000433579	0.00113644	-0.00018136	-0.000275348	-0.000665743	9.12673e-06	1.04517e-05	-0.000100235	9.30297e-05	9.6062e-06
MR0286_TraceCoords	G33	-0.0271427	0.0505674	-0.00817165	0.00598351	-0.00544014	0.00302932	0.00254365	0.004237	-0.00207308	0.000833799	0.00325691	-0.000246119	0.00135333	0.000334804	-0.000893444	3.28918e-05	-0.000296906	-0.000655456	-0.000454606	0.00016287	-0.000181183	-0.000164156	-0.000141078	1.78146e-05
MR0287_TraceCoords	G33	0.0339866	0.0523259	-0.00604821	-0.0255146	0.00128009	-0.0124659	-0.00374659	0.00587763	0.00117091	-0.00413476	0.00278483	0.00107445	0.000940855	-0.00180521	4.04562e-05	0.00164205	-0.00170226	0.00113256	0.00067001	7.75684e-05	0.000816688	0.000417472	9.32678e-05	5.64199e-06
MR0288_TraceCoords	G33	0.116696	-0.00157788	-0.00982213	0.0102702	0.00829897	-0.00207907	-0.00539423	0.00133658	0.00195304	0.00134117	-0.00263251	8.90936e-05	-0.000996928	0.00262487	2.38304e-05	3.80779e-05	0.000500883	-0.00113525	0.000394237	-0.000234015	-8.60341e-05	0.000121721	-0.000325716	4.37332e-08
MR0292_TraceCoords	G33	-0.0205613	-0.00413989	0.00734097	-0.00878266	-0.00264187	-0.00558667	0.00221425	-0.00351785	-0.000581702	-0.0010548	-0.00248551	0.00124604	-0.000609159	0.00095387	0.000493889	-0.000338105	-0.00022965	1.38403e-05	2.18125e-05	-0.000130806	-0.000206932	-7.39438e-05	-7.00165e-05	-5.34941e-06
MR0293_TraceCoords	G33	-0.0693396	-0.0034242	-0.0165206	0.00250697	-0.00524544	-0.009202	0.0075786	0.00150863	0.000541747	0.00255706	-0.000467551	-0.00114243	0.00205198	-0.00267946	0.00118638	0.000510822	0.00062896	-0.000231987	-5.18901e-05	0.000373038	-0.000290646	-0.000374945	-0.000206702	6.17937e-06
MR0294_TraceCoords	G33	0.0274169	-0.0486436	0.0065031	-0.00197024	-0.000290156	0.00325252	-0.00229651	0.00153548	-0.000203772	9.82608e-05	-0.000814213	-0.000772729	0.00131333	0.0013621	0.000867667	0.0011996	0.000918313	0.000448883	9.98447e-05	7.62581e-05	0.000247007	-9.87319e-05	2.98149e-05	2.57192e-05
MR0302_TraceCoords	G33	-0.0765466	0.00872436	-0.0131072	-0.011267	-0.00150159	-0.0109835	0.00101695	0.000354036	0.000454259	0.000106392	-0.000810145	-0.00166258	0.000571998	-0.000739408	-0.000258674	-0.000984383	0.000290342	-0.000338534	-0.000106078	0.00011697	6.84682e-05	-0.000296537	-0.000117799	-2.76704e-06
MR0303_TraceCoords	G33	0.0964406	-0.00514026	-0.00763486	0.00861667	0.003132	-0.00220092	0.00130987	-0.00157298	0.000851005	-0.00312214	-0.00054743	-0.00109456	0.00033704	0.000206051	-0.000603146	-0.000680023	-0.000430688	-1.58893e-05	0.000152084	0.000364352	-0.000186179	0.000135848	-4.32105e-05	-4.11737e-06
MR0306_TraceCoords	G33	0.0236135	-0.00464637	0.0101892	-0.00735557	-0.00157957	0.00423417	-0.000345025	-0.00433258	-0.00356689	0.00154336	0.00114867	0.000486849	-0.000284917	-0.000372699	0.000159057	0.000233598	2.51184e-05	-3.63739e-05	-0.000127466	-0.00024331	0.000132291	-4.06477e-05	-9.3388e-05	1.10284e-05
MR0310_TraceCoords	G33	0.00990487	0.0360612	-0.00476837	0.00505885	-0.00553543	-0.00209377	-0.00642643	0.00532675	0.000827389	-0.00213887	0.00190436	0.000258191	-0.00104999	0.000210736	-0.000362206	0.000235322	0.000201594	0.000511731	-0.000162491	0.000147634	0.000202123	0.000306529	1.3286e-05	-1.34069e-06
MR0311_TraceCoords	G33	0.0893211	0.0116131	-0.00923891	0.0055238	0.000860588	0.00274395	0.00267439	0.00107575	-0.000189614	0.00015388	0.000995142	0.000611517	0.000914636	0.000626877	-0.000492716	-0.00125215	-4.76577e-05	0.000418596	0.000139263	-0.000438367	-5.10239e-05	0.00018836	1.03464e-05	1.14314e-05
MR0313_TraceCoords	G33	0.101128	-0.00191051	-0.0114703	-0.00751196	0.00389527	0.00250166	0.00383525	-0.00185825	-0.00125192	-0.000743154	-0.00254608	0.00148862	0.00262481	-0.000222618	-0.000451824	0.000719609	-0.000144113	0.000583139	-0.000335034	6.24909e-05	-0.000295481	3.47338e-05	-0.000180057	2.15678e-05
MR0314_TraceCoords	G33	0.041465	-0.00481679	0.00846637	-0.0080191	-6.09947e-05	-0.00400978	-0.00124662	0.00148498	0.00210686	-0.00201708	0.00076393	-0.000724274	-0.00101581	-0.000811823	0.000161165	8.40852e-05	0.000545279	0.000211085	-8.79401e-05	-0.000338078	0.000478986	-0.000193636	6.05463e-05	1.19477e-05
MR0315_TraceCoords	G33	0.0398376	0.0354738	0.0144819	0.00456825	0.00296989	-0.00421652	-0.0108403	0.00220495	0.00173459	-0.00186594	0.000284372	-0.00288822	0.00123423	-0.000200459	3.02329e-05	5.10243e-05	8.96869e-05	0.00105499	-0.000358044	0.000729454	3.00766e-05	0.000747138	-9.58935e-05	2.69957e-06
MR0318_TraceCoords	G33	0.0146429	-0.0290337	-0.000301516	-0.0039685	-0.00407306	-0.00268858	-0.00414723	-0.00253615	-0.000224075	0.000494885	-0.000133525	-0.000200621	-0.00139395	0.000971687	-0.000941586	0.000218107	0.000298009	-0.000141856	0.000365331	3.80465e-05	-8.19456e-05	-6.16245e-06	-0.000142653	-5.594e-06
MR0319_TraceCoords	G33	0.0080257	-0.0220558	0.00691462	-0.00120545	-0.00277051	-0.0018989	-0.00279289	-0.00286702	0.00140158	0.00238599	0.00194641	-0.000335572	1.68768e-05	-0.000413876	-0.000447056	-3.9863e-05	-0.00017528	-0.000389673	0.000179644	0.000387055	-9.69049e-05	4.27632e-05	-2.62783e-05	6.01263e-06
MR0325_TraceCoords	G33	0.000248182	0.0187286	0.00378606	0.0135831	-0.00525881	0.000954109	-0.00195151	-0.00245233	-0.00184348	-0.000664566	-0.00247537	0.000878403	-0.000146892	-0.000368922	-0.00010771	-0.000167763	-6.90537e-05	0.000440535	-0.000464648	-0.00022474	1.56609e-05	-0.000258415	-7.32522e-05	-8.11054e-06
MR0330_TraceCoords	G33	0.125121	-0.00165258	-0.020134	-0.00427736	0.00903981	-0.00392161	-0.00261545	0.00309666	0.00280282	-0.00185286	-0.00121533	-0.000669983	-8.907e-05	0.00132835	0.00107231	-8.55401e-05	-0.00108478	0.000191652	0.000560691	-0.000528296	-0.000983069	-0.000124414	-0.000523752	-4.46666e-06
MR0337_TraceCoords	G33	0.0169903	-0.00702672	0.00556393	0.000856646	-0.00471526	-0.00396986	0.00403133	-0.00174561	-0.00119237	0.00246203	0.0001738	-0.00188847	-0.00205375	0.00250229	-0.000804368	0.00190086	0.000891363	0.00240046	-0.00184605	0.00152323	0.00241684	0.00135231	-0.0025579	6.0236e-06
MR0341_TraceCoords	G33	0.00133111	-0.0324791	-0.000468691	0.00992419	-0.00655274	0.00643869	0.0067092	-0.000813819	0.00119315	-0.00347404	-0.000791057	0.00104215	-0.000376879	9.04699e-05	-0.000409203	0.000719995	0.000189378	0.000165238	-8.09811e-05	-0.000119832	2.54376e-05	0.000207554	0.000260054	1.39295e-05
MR0342_TraceCoords	G33	-0.00159021	-0.0235011	-0.00542529	0.0067216	-0.00799351	0.000613813	0.00540261	-0.00410483	0.00148736	0.00126676	-0.00132727	-0.000833741	0.000474286	-0.000121613	8.93338e-05	-2.81403e-05	0.000226135	0.000598117	-0.000107211	-0.000463636	0.000192839	0.000211666	-6.94175e-05	8.10468e-06
MR0345_TraceCoords	G33	-0.0446562	-0.0312964	0.0117311	-0.000593005	0.00149375	-0.00227048	-0.00517686	0.0014663	-0.00295608	0.00239988	-0.00222575	0.00307596	0.000767007	0.00104417	0.00248237	0.000226062	-0.000796476	-0.000253131	-8.54032e-05	-7.13264e-05	0.000450838	-0.000560298	-0.000124578	1.03508e-05
MR0347_TraceCoords	G33	-0.00350465	-0.0238861	0.0133027	-0.00189531	-0.0015665	-0.00533115	0.00779064	0.00420231	0.00458838	0.000625378	7.4076e-05	0.00256408	0.00256274	0.00209176	0.000464869	-0.00121179	0.00105857	-3.19207e-05	-0.000762826	-0.000309538	0.000331029	-0.000207567	0.000313596	-5.3841e-06
MR0348_TraceCoords	G33	0.0251857	0.0263121	-0.00235579	0.00135444	-0.00487192	0.000724297	-0.00264415	-0.00053858	-0.000176785	0.000329792	-0.00279358	0.00114504	0.00156722	-0.000758754	0.000295538	-0.000117391	-7.4339e-05	0.000245101	0.000316662	-4.84311e-05	-7.61939e-05	-4.08299e-05	9.40005e-05	-1.77796e-05
MR0351_TraceCoords	G33	0.0482995	-0.00590738	0.000337206	0.00831608	-0.00330715	-0.00191404	0.00239525	-0.0034805	0.00261966	0.000210556	-0.000706526	-0.000479654	-0.000736114	-0.000276204	0.000513072	-0.000438731	-0.000678565	-3.34419e-05	0.00023517	0.000199294	0.000323225	-7.02182e-05	7.268e-05	8.84977e-06
MR0353_TraceCoords	G33	0.0321997	-0.00841058	0.00646124	-0.00752055	-0.00202103	-0.000245859	0.00020614	0.00159705	0.00386505	-0.000586913	-0.00100067	-0.000338231	0.000479876	-0.000371587	0.000129536	0.000252193	8.51654e-05	-0.000173023	6.63605e-05	0.000132258	9.37005e-05	-0.000112985	-0.000111566	4.58045e-06
MR0356_TraceCoords	G33	0.0386473	-0.0187614	-0.0105977	0.00731648	-0.0073518	0.00409272	-0.00100945	0.00540203	-0.00246287	0.0045313	-0.00295467	-0.00204305	0.00118104	0.000615859	-0.00100193	-0.000113112	0.000302727	8.60646e-05	1.09498e-05	-0.000544233	0.000322882	-0.000176665	-0.000384869	2.56764e-06
MR0357_TraceCoords	G33	-0.0385696	-0.00735031	-0.0111821	-0.00220045	-0.00816756	0.0043207	0.00256359	-0.000127849	0.00204227	-0.000345633	-0.00304091	6.45191e-05	0.000115478	-0.000220383	-0.000640538	0.000501453	-1.81696e-05	0.000128818	-0.000215362	8.60909e-05	0.00017074	0.00023827	9.69712e-05	-7.87809e-07
MR0358_TraceCoords	G33	-0.0468272	-0.0562603	-0.00707876	0.0066002	-0.00257308	0.00213931	-0.00438797	-0.00184017	-0.00203409	-0.00603001	0.00319074	0.000194254	0.00164506	0.00189894	-0.000778189	0.000904077	-0.000279869	0.00125596	0.000144395	-8.11337e-05	-0.000724943	-0.000207797	0.000313476	-8.34814e-06
MR0362_TraceCoords	G33	0.0474298	-0.00273575	0.00779291	-0.00198204	5.574e-05	-0.000598619	-0.00455127	-0.000716973	-0.000324547	0.00130776	0.00321959	-0.00176313	-0.00156343	-0.000526705	0.00062096	-6.68516e-05	-2.1003e-05	-0.000327324	1.88393e-05	0.000185493	0.000190252	9.40867e-05	0.000218116	7.33195e-08
MR0364_TraceCoords	G33	0.0224301	0.00960389	-0.0099354	0.0117879	-0.00809115	-0.00410156	-0.00421939	0.00082567	0.00184623	0.00274664	-0.00117538	0.000415829	-0.000136697	0.000531471	0.000139774	-0.000318458	-0.000259996	-0.000398468	8.36443e-05	8.77906e-06	-3.40072e-05	0.000180293	-0.000109917	-2.40975e-06
MR0367_TraceCoords	G33	0.0293988	0.00690958	0.0188096	0.00415447	0.000862293	0.000320328	0.000585133	-0.00177575	0.00145593	-0.000478152	-0.00153955	-0.000351714	0.000752242	-0.000981737	0.000342708	-0.000343689	0.000107311	0.000516399	-4.02111e-07	9.54745e-05	0.000120967	-0.000389595	7.73783e-05	1.75851e-05
MR0368_TraceCoords	G33	0.0881991	0.00888375	0.00156928	-0.0144112	0.00620456	0.00131282	-0.00286234	0.00485111	0.00406851	0.00138214	-0.000304238	0.000648401	-0.000304578	-0.0022378	-0.000747944	0.00154866	0.000291887	5.08446e-05	0.000572083	0.000230482	-8.73344e-05	0.000348709	-0.0003182	-7.91854e-06
MR0372_TraceCoords	G33	0.140383	-0.0296061	0.00137929	0.00719801	0.0199472	-0.00393426	0.00817235	-0.00165428	-0.0016552	-0.00224173	-0.00159745	-0.0041827	-2.21277e-05	-0.00111228	-0.00226592	-0.00112522	-0.00047026	0.000450314	-5.83694e-05	-0.000281976	3.56443e-05	0.000322438	0.000184748	1.00169e-05
MR0373_TraceCoords	G33	0.0864672	0.021886	-0.0112934	-0.00985788	0.00179131	0.00162462	0.00021262	-0.00118168	-0.00370993	0.00070649	-0.000720176	0.00362827	-0.0011228	0.00118325	8.00709e-06	0.000797116	4.91325e-05	8.72497e-05	-0.000830961	-0.000384465	-7.23299e-05	-0.000355795	-0.000482803	-1.97293e-05
MR0375A_TraceCoords	G33	-0.00774934	-0.0115625	-0.0188031	0.00153667	-0.0111443	-0.000278793	-0.000447599	0.0021028	0.000160928	-0.00309551	0.00263227	-0.00201144	-0.0016385	-0.000342988	-0.00104257	-0.000151863	0.000175476	0.000235554	-0.000211541	-0.000586326	-0.000160807	9.20175e-05	-2.16883e-07	-4.92167e-06
MR0375B_TraceCoords	G33	0.0777225	-0.00755308	-0.00505487	-0.00652257	0.00116398	0.000584273	-0.00294603	0.00067415	-0.00285718	0.00263637	0.00336454	0.000430654	-0.000252792	0.00042087	0.000291293	0.000130524	0.000759797	-0.000109588	-0.000510227	-0.000759934	0.000220814	9.84482e-05	0.000161857	-5.39545e-06
MR0376_TraceCoords	G33	0.049963	-0.000261934	-0.00198076	-0.00205692	-0.00386117	0.00677041	0.00234571	0.00553328	0.00130534	0.00198663	0.000308462	-0.000908019	-0.000305762	-0.000220362	0.00021529	0.000401664	0.000191542	0.000517283	0.000374545	-0.000172522	0.000166289	0.000145156	-3.49649e-05	1.09498e-05
MR0377_TraceCoords	G33	-0.0504393	-0.00769969	0.00965479	0.00309295	-0.000274791	-0.00986507	0.00171586	-0.00151723	0.000714244	0.000832475	-0.00241292	0.000987913	0.000793124	0.000433439	-0.000468447	-9.94605e-05	0.000512643	-1.73462e-05	-0.000120946	-0.000198735	0.000101043	-2.59113e-05	3.07064e-05	-3.2975e-06
MR0378_TraceCoords	G33	0.070186	0.0183736	0.00603687	-0.00826255	0.00384288	-0.00258334	0.000434699	-0.00492308	-0.000949843	-0.000383472	0.000419957	0.000330019	0.00113021	-0.00225638	-0.000131368	0.000251926	-0.000532337	4.81842e-05	-0.000376172	0.000300149	-5.64174e-05	-0.000114617	2.81426e-05	-5.15851e-08
MR0380_TraceCoords	G33	0.0160649	-0.0172223	-0.00470684	0.00311304	-0.00670862	-0.00471913	0.00247628	-0.00249482	6.65001e-05	-0.000102287	-0.000352964	-0.000700336	1.05688e-05	-0.00181559	-0.000368007	7.21629e-05	0.000248765	0.000519475	0.000760832	-0.000883775	0.00027525	0.000888556	0.000598937	-1.35452e-05
MR0382_TraceCoords	G33	-0.074243	0.0205131	-0.00529014	-0.00648836	-0.00032699	-0.00965166	0.00595249	0.000959307	0.000660685	-0.00131348	-0.00162701	0.000362592	0.00115135	-0.00111084	-6.16608e-05	0.000215251	0.000418901	-0.000212702	0.000335707	0.000413237	2.90668e-05	-0.000109005	-2.35563e-05	-3.16351e-06
MR0384A_TraceCoords	G33	-0.039473	-0.0210674	-0.00359756	-0.0063224	-0.0043259	-0.00666218	0.00209264	0.00312298	0.000188807	0.00323764	-7.88558e-05	0.000713684	-0.00152412	0.00101373	0.000240114	8.12004e-05	-0.000722951	-0.000165681	0.000294468	0.000303805	-6.31621e-05	-6.67703e-05	-3.52799e-05	6.38312e-06
MR0384B_TraceCoords	G33	-0.0277911	-0.0130566	0.0186831	-0.00204875	0.00187131	-0.0128823	-0.00225966	0.00119726	0.00498963	0.000804261	-0.000805924	0.00137551	0.00249419	0.00141054	0.00129356	-0.00105608	0.000590552	0.000180401	-0.000609483	-0.000187558	-2.88932e-05	5.22429e-05	0.00013506	-6.50984e-06
MR0387_TraceCoords	G33	-0.00451953	-0.0207621	0.0132507	-0.00399246	-0.000717223	-0.00570819	-0.0013842	-0.00160732	-0.000521882	0.00135167	0.000573386	0.000819193	0.00114794	0.00034793	0.000243797	2.71643e-06	-8.87665e-05	-7.34919e-05	0.000311837	0.000418939	-9.0259e-05	0.000245377	-2.53394e-05	-1.00541e-05
MR0388_TraceCoords	G33	0.048394	-0.0120911	0.00973122	-0.00165969	0.00041064	0.00222802	-0.00155493	-0.000917371	0.00095987	-0.00177476	1.85716e-06	-0.00163341	0.00154914	-0.000674223	0.000639101	-1.40086e-05	0.000196755	-0.000320238	3.04063e-06	-0.000203815	-7.98393e-05	-0.000467877	-0.000250454	-5.90804e-08
MR0389_TraceCoords	G33	0.103044	0.0062518	-0.00479268	0.0184433	0.00582268	-0.00723024	-0.0036661	0.00468868	0.000107691	-0.00290948	-0.00274268	-0.00260629	-0.000751925	0.00271184	0.000606376	-0.000905575	-0.00066844	-0.000106897	0.000337906	0.000590295	-0.000326332	-5.0019e-06	-4.92091e-05	6.44338e-06
MR0390_TraceCoords	G33	-0.0451227	0.0133558	0.0146768	0.00277124	0.000668604	0.00658712	-0.00783127	-0.000642072	0.000737346	0.00184053	-0.00068987	0.000661916	-0.000209395	-9.17668e-05	-0.00033025	0.000725309	-0.000272892	0.000345052	0.000266204	-0.000105059	2.80729e-05	1.60561e-05	0.000121922	6.16623e-06
MR0391_TraceCoords	G33	0.0916398	0.0113607	-0.0119028	-0.00435233	0.00278074	-0.00309314	-0.0071313	0.00244744	-0.00283613	0.0012122	0.000383433	-5.83557e-05	7.66619e-05	0.00106686	0.000429069	0.000257228	-3.35082e-05	-0.00112049	-0.000112638	-0.000780071	0.000127928	0.000188531	7.51291e-05	1.18426e-05
MR0392_TraceCoords	G33	-0.000709772	-0.0213891	-0.00485228	-0.00215976	-0.00738508	0.00586712	0.00143044	-0.000212512	-0.000354316	0.00153018	-0.00200072	-0.000131858	0.00159151	-0.000624869	-0.000786661	0.000965739	0.000703972	0.00022146	3.0208e-05	0.000385875	7.40695e-05	0.000184593	-6.40911e-05	1.45024e-05
MR0395_TraceCoords	G33	-0.0126356	-0.0116138	0.00504141	-0.000220075	-0.00350343	-0.00293975	-0.0067237	-0.00171963	0.000442914	-0.000236062	2.34771e-05	-0.000493791	0.000453039	-0.000848799	0.000848938	-0.000258151	-0.000276506	-0.000137581	5.52945e-05	-0.000311314	-0.000105894	7.30033e-05	-0.00014423	-2.51254e-06
MR0403_TraceCoords	G33	0.0403394	-0.00784449	0.00644379	-0.0021139	-0.00189068	0.00449506	0.0018269	-0.00606593	-0.000533987	-0.00290524	0.000117043	-0.00019076	0.000465004	-0.000828739	6.70824e-05	-0.000685123	-0.000255896	0.000157021	-0.000233836	3.06841e-05	-0.000227583	-0.000203792	-0.000148983	1.52405e-05
MR0404_TraceCoords	G33	-0.0444565	-0.0481101	-0.00339022	0.00249999	-0.00341904	0.00525776	0.00436051	-0.00236528	-0.00237738	0.00255981	-0.0019798	0.0019855	-0.000321356	0.00204443	-0.00179824	0.00108392	0.000310526	0.000624023	0.000325476	0.000513818	0.00013095	0.000596444	-5.24472e-05	1.94841e-05
MR0407_TraceCoords	G33	0.0229833	-0.0103425	0.00610973	-0.000289307	-0.00474902	0.0117518	0.0106832	0.00230049	-0.000260739	0.00534466	0.000287235	-0.000234424	0.000578215	-0.000753958	-0.000554098	-0.000127605	0.0010405	0.00100913	0.000133716	-4.99007e-05	0.000395854	0.000519752	0.000101807	-3.50478e-06
MR0409_TraceCoords	G33	0.133435	-0.0170829	0.00184394	-0.00651612	0.0181024	-0.00186794	0.00378227	0.00223181	0.00189304	-0.00289421	0.00113042	-0.00256264	-0.00254602	-0.00113052	4.72533e-05	0.00130055	-8.10342e-05	0.000163574	0.000491483	0.000714501	-0.00017704	-0.000463062	0.000228806	-4.61961e-06
MR0410_TraceCoords	G33	-0.0500199	-0.0493175	-0.00863987	0.013353	-0.00338598	-0.00263619	-0.0022147	-0.00332217	-0.000954795	0.00177214	0.00306365	-0.000359748	0.000543326	-0.000443391	0.000169845	0.000320724	9.26432e-05	0.000646632	0.00034747	1.86434e-05	2.89831e-06	-9.62981e-05	-0.00013169	8.20815e-06
MR0411_TraceCoords	G33	0.0903925	-0.00207565	0.0016104	3.15675e-06	0.00523568	0.00140113	-0.00130687	-0.00312192	0.00209622	0.00291988	0.000811595	-0.00130991	0.000356722	-0.00101603	0.000942732	-0.000219576	0.000246218	-0.000595897	3.43824e-05	0.000536767	0.000415384	8.41339e-05	0.000179518	1.26205e-06
MR0412_TraceCoords	G33	-0.00296073	0.0043058	0.0178412	0.00112568	-0.000623112	-0.00284298	0.00173894	0.00127063	-0.000876048	0.00224418	0.000236845	-0.00104154	0.000947739	-0.000496228	5.22118e-06	5.45909e-05	-0.000194982	0.000266029	-3.53266e-05	-0.000309996	0.000313118	3.44764e-05	0.000102568	4.68002e-06
MR0416_TraceCoords	G33	0.152087	-0.0115695	-0.0106529	0.0238233	0.0187189	0.00024207	0.0094123	0.00495385	0.00860125	-0.00185994	-0.00265305	0.00189742	0.00240249	0.00236144	0.000981678	-0.00326593	-0.00284326	-4.99654e-05	0.00368274	0.00213637	0.000221588	9.22403e-05	-2.68305e-06	3.11393e-05
MR0420_TraceCoords	G33	-0.104981	-0.0188119	-0.0088608	0.00853411	0.00411769	0.000758038	-0.00566838	-0.00100155	0.00096491	0.00156778	0.00114802	0.00101709	-0.00104936	-0.00108973	-0.000275283	0.000291209	-0.000588329	0.000167916	-6.12178e-05	2.45873e-05	-0.000190492	2.19766e-05	-8.45574e-05	-1.58494e-05
MR0422_TraceCoords	G33	0.0642341	0.0197113	0.00220349	-0.0064794	0.0020038	-0.00890945	-0.00309581	0.000556643	-4.44804e-05	-0.000348811	0.000216465	-0.00123391	0.000304435	-0.000875828	-0.000572437	0.000524506	-0.000975299	0.000117477	-8.15959e-05	0.00027948	0.000159678	5.72542e-05	4.84508e-05	2.01159e-06
MR0424_TraceCoords	G33	-0.0125131	0.0207464	0.0174328	0.0157015	-0.00161085	0.0013913	0.00917618	-0.00179336	0.0018317	0.00525217	0.00337532	-0.00277176	0.00120012	0.000579575	-0.000647868	0.000631495	0.000140035	-0.001028	-0.0001994	4.63252e-05	-0.000399435	-0.000113789	-0.000201049	-2.22123e-06
MR0426_TraceCoords	G33	0.00734364	-0.00995864	0.00838921	-0.00280808	-0.00193349	-0.0122439	-0.00325178	0.000613579	0.00298393	-0.00116626	0.00261112	-0.001995	0.00125162	0.000106379	0.000475614	-0.000628243	7.4712e-05	-0.000225372	-0.000424783	-0.000209294	0.000251679	2.46871e-05	4.92682e-05	2.00285e-05
MR0429_TraceCoords	G33	-0.0427027	-0.0109972	-0.00700016	-0.00355387	-0.00553572	0.00365492	-0.00654798	0.00421752	-0.00218386	-0.000101416	-0.000922333	-0.00182386	0.000724955	-0.0006822	0.000712023	-0.00066491	-0.00035624	0.000110807	0.000225963	-0.000172861	0.000292031	0.000183043	5.70092e-05	-1.64513e-05
MR0430_TraceCoords	G33	0.0714358	0.00439202	-0.00386432	0.00226682	-4.83497e-05	-0.00374261	-0.00326241	0.000445956	-0.00102915	0.00181405	-0.000477862	0.000281674	-0.00226226	0.000730303	0.0013409	0.000771593	-0.000557699	-0.000633113	-0.000114503	-0.000109609	0.000347095	-0.000179552	-1.70251e-05	1.00959e-05
MR0431_TraceCoords	G33	0.00228683	0.010817	0.0175772	-0.00974257	0.000145066	-0.00109211	0.00402911	0.00167549	0.00116318	0.00251956	-0.000870972	0.000168915	0.0018172	-0.000410351	0.000611215	-0.000345721	0.000104549	0.000319092	-5.86484e-05	-0.000310328	-0.000387431	0.000203561	-0.000104948	1.52655e-05
MR0434_TraceCoords	G33	0.096567	0.00175531	-0.00819946	-0.00139424	0.00372129	0.00165741	-0.00233393	-0.000205277	0.00273186	-0.00084589	-0.000545727	-0.000426384	0.000926335	3.34208e-05	0.000155199	-0.000390335	0.000291848	-0.000282079	0.000526512	0.000216451	1.26963e-05	0.000306462	3.37409e-06	1.16867e-07
MR0435_TraceCoords	G33	-0.0222698	-0.0345385	-0.0064214	0.00466326	-0.00561329	-0.011095	0.00127714	-0.00571313	0.000814989	0.00100239	-0.00129309	0.00015474	-0.000142	-0.00066602	-0.000591954	0.000169046	0.000221384	0.000304949	0.000410955	-0.000130642	-0.000194156	0.00033455	0.000235674	8.91794e-06
MR0437_TraceCoords	G33	-0.206839	-0.0376968	-0.0444713	0.0212113	0.0368	-0.011372	0.00258358	-0.00608257	-0.000589431	0.00403142	-0.0012596	0.00323184	-0.00319592	-0.00797569	-0.00029445	-0.000283024	0.00256674	0.0027785	0.000196622	-0.000156005	-0.00050373	0.000413801	-0.000223908	6.07143e-06
MR0438_TraceCoords	G33	-0.0266805	0.0021216	0.00591142	-0.00899199	-0.00272573	-0.00572776	0.00254248	-0.00245745	0.00146325	0.000554185	0.000887764	0.000501741	-8.61089e-05	9.87441e-05	0.000281891	-0.000304721	-0.000148643	-0.00047596	-0.00018925	-0.000143244	5.65483e-05	6.95628e-05	0.000124947	-1.02654e-05
MR0442_TraceCoords	G33	0.0854584	-0.0145985	0.00981107	0.00399497	0.00695113	0.00252238	-0.00408502	-0.00524623	0.00114206	-0.000186659	0.000823607	-0.00185755	-0.00169351	-0.000426478	0.00165125	-0.000456217	0.000256648	-0.000776299	-0.000265981	0.000700233	5.10948e-05	-0.000315121	0.000360032	-1.29384e-06
MR0443_TraceCoords	G33	0.0366714	0.0206657	-0.00838428	0.00534561	-0.00603656	-0.000211722	-0.00351584	-0.00182304	-0.00323464	0.000879284	-0.000852771	0.00151662	0.00131835	0.000319239	0.000589464	-0.000835376	0.000286485	-5.24824e-05	-3.82587e-05	-4.27268e-05	-0.000150705	6.40881e-05	0.000131596	-8.11781e-06
MR0445_TraceCoords	G33	0.0532064	0.0284066	0.000460456	-0.00521439	-0.00145598	0.00976457	0.00548103	0.0102183	-0.00082522	-0.00200886	-0.000597772	0.00115195	-0.0012138	-0.00215976	-0.00151205	-0.00151633	-0.000569844	0.00112139	0.000132816	-0.000373582	-0.000340284	-0.000373305	-0.000559721	-1.83889e-06
MR0446_TraceCoords	G33	0.0414971	-0.0154205	-0.0073563	-0.00706954	-0.00512009	-0.000361921	0.0018516	-0.00363657	0.000923848	0.00114389	0.00093315	-0.00147974	0.00195565	-0.000264883	-0.00101751	0.000955331	4.04281e-05	-0.00037783	0.000153578	0.000460469	-0.000330198	0.000428909	5.46759e-05	9.78282e-08
MR0447_TraceCoords	G33	0.0680667	0.0250186	-0.000489771	-0.012211	0.0031151	-0.00280908	-0.0104869	0.00104875	-0.00178261	0.00244952	0.00235075	0.00112055	-0.00161035	-0.000362609	0.000723406	0.000638511	0.000490683	-0.000261539	-0.000224303	-0.00058353	0.000255186	0.000283694	0.000257084	-9.51936e-06
MR0448_TraceCoords	G33	-0.0100636	-0.0158884	0.00489848	0.00278466	-0.00378048	-0.00693668	-0.00291787	-0.00277138	-0.00254708	-0.000643664	-0.000998488	-0.000291266	-0.00232466	0.0002679	0.000197816	-0.000128095	-0.000430156	0.000325406	-0.000104275	-0.000369975	-0.00033682	3.23051e-06	-0.000258128	9.4126e-06
MR0449_TraceCoords	G33	0.0895746	-0.0133797	-0.00175113	0.0216553	0.00327232	-0.00761491	0.00247187	0.000229806	0.000258409	0.00594535	-0.00556047	-0.00431417	0.000365831	0.00181792	0.00014487	-0.000672689	-0.00104897	-0.000845501	0.000783872	-0.000612498	0.000868206	0.000485501	-0.000187413	-8.34478e-06
MR0450_TraceCoords	G33	0.0350289	-0.0134646	0.00226435	-0.00708947	-0.00204913	-0.0105487	-0.000828753	-0.000758812	0.00190901	-0.00117515	-0.00132894	-0.00100023	0.00235994	-0.000220924	0.000498885	0.000252746	0.000171374	-0.000340583	-0.00011528	-8.02758e-05	0.000185609	-4.97482e-05	6.40517e-05	-3.66159e-06
MR0452_TraceCoords	G33	-0.0648504	0.0335154	0.00338285	-0.0108515	0.00147747	-0.00306669	0.00384254	-1.16123e-05	0.00150309	-0.00335036	-0.00158632	-0.000977621	-0.000335354	0.000522079	0.000207049	-0.000531196	-0.000422661	-0.000205601	0.00032481	5.31583e-05	8.42023e-05	0.000119252	0.000254761	-1.38173e-05
MR0457_TraceCoords	G33	0.000833018	0.00276261	0.0079622	0.00283557	-0.00419724	-0.00239181	0.005132	0.000133623	-0.00160998	-3.86107e-05	-0.000906894	-0.000340084	-0.00070421	-0.000606627	-0.00108111	1.17179e-05	-0.000394619	0.000331305	-0.00030477	-0.000326169	-8.28977e-05	-5.97648e-05	-8.35951e-05	-1.49503e-05
MR0465_TraceCoords	G33	0.0120403	-0.026789	0.00946609	0.00795966	-0.00348967	0.00576762	0.00561442	0.00239481	-0.00129944	-0.00107972	-0.00122848	0.000458497	-0.00209817	0.000726598	-0.00051365	0.000758816	-5.63664e-05	-2.01437e-05	0.000149028	0.000464057	0.000412168	-0.000637564	-0.00023074	-1.75692e-06
MR0466_TraceCoords	G33	0.0769441	0.0145048	0.00546099	0.00145485	0.00362527	0.000273323	-0.00123143	-0.00206279	-0.00022163	0.00282868	0.00026713	0.000268108	-0.00095779	1.91859e-05	-0.00126672	-0.000417517	0.000117385	-6.01585e-05	-0.000372544	-0.000188806	0.000235049	-0.000287406	-0.000210552	-1.90376e-05
MR0467_TraceCoords	G33	-0.0625546	-0.0535432	0.00162098	0.0151124	0.00174409	0.000140042	-0.00743738	0.00332391	0.000265144	-0.00318738	0.00146686	0.00195329	0.00098968	0.00035984	-0.000501322	0.000864351	-0.00110978	0.000417722	0.00011985	8.56566e-06	0.000128464	-0.000273765	2.24285e-05	-5.11989e-06
MR0470_TraceCoords	G33	0.0329923	0.00564309	-0.00028228	0.00261671	-0.00457399	-8.62909e-05	-0.000642448	-0.0011888	-0.000518418	-0.000773874	-2.9598e-05	0.000595232	-0.00206116	-0.000813573	8.14709e-05	-0.000744357	0.000652613	3.21967e-05	-7.6117e-05	-0.000157115	0.000195925	-0.000148698	-6.62865e-05	-3.49753e-05
MR0472_TraceCoords	G33	0.0726692	0.0156933	-0.0151749	-0.00181205	-0.00340987	-0.00114784	0.00947647	0.0049876	0.00203376	0.00478046	0.00106377	0.0029374	-0.000739494	-0.000445298	0.000336616	0.000337685	-0.00123593	0.000710502	0.00128486	0.000118211	0.000717545	-0.000220071	-0.000124319	-2.57194e-05
MR0475_TraceCoords	G33	-0.0518237	-0.017046	0.0026053	-0.000879931	-0.00247876	0.000717616	0.00259232	0.00229852	-0.00159744	0.000931065	0.000975371	0.000342682	0.000312789	6.47295e-05	-0.00111743	7.22458e-05	-0.000130965	-0.000595764	0.000270472	-1.35275e-05	-0.000188761	3.46349e-06	5.85148e-05	6.61699e-08
MR0476_TraceCoords	G33	0.118183	-0.000669504	-0.00128223	0.00425737	0.0111044	0.00547271	-0.000811273	-0.00137174	0.00130497	0.00152397	-0.000714073	-0.000436407	0.00188431	-0.00101892	0.00122864	-0.000860547	0.000461991	-0.000554338	2.88208e-05	0.000454838	-0.000207027	0.000381342	0.000209548	6.35249e-06
MR0477_TraceCoords	G33	0.013818	0.0315544	2.6821e-05	0.00946646	-0.00494651	-0.00148228	-0.00241004	0.00524236	0.00128371	-0.00119971	-0.000364237	0.000415587	0.000545918	-0.00039857	0.000324976	0.000104499	-0.000535125	0.000359533	-2.82057e-05	0.000466667	-4.00571e-06	3.76058e-05	-4.81197e-05	1.78425e-06
MR0480_TraceCoords	G33	-0.027136	0.0272426	-0.0122078	-0.00526195	-0.00740295	-0.00572252	0.00548022	-0.00181088	0.00186357	-0.000686244	0.000193044	0.000112758	0.000128054	-0.000752332	0.00149663	0.000131857	-0.000515159	-9.5519e-05	0.000308526	0.000129006	-4.1005e-05	-0.000107717	-0.000284697	9.14994e-06
MR0483_TraceCoords	G33	0.13355	-0.0107414	-0.0178213	0.00821862	0.0111828	-0.00394631	0.00152864	0.000644582	-0.000793114	-0.000226851	-0.000797464	-0.00100347	-0.000606056	0.00251195	-0.000357663	-0.000547712	-0.000838743	-0.000432563	0.000279936	-0.000452617	1.88427e-05	-0.000154304	-0.000166138	-6.85627e-06
MR0489_TraceCoords	G33	0.00571099	-0.00796683	0.00598781	-0.00171583	-0.00401639	-0.0055629	0.00478218	-0.000277963	0.00010002	-0.00265082	0.00057006	-0.000200948	-0.00182544	-0.000511862	-0.00107169	0.000797136	4.99768e-05	-0.00033591	-2.30844e-05	0.000266868	-0.000239585	-0.000194596	0.000184387	-1.37288e-05
MR0491_TraceCoords	G33	-0.0408468	0.0430077	-0.0154452	0.000836575	-0.0066504	0.00240959	0.00113617	-0.000502009	-0.00160203	0.00133524	0.00125431	0.000459975	0.00211723	-0.000215296	0.00189378	0.000532969	0.000616013	-0.000294146	0.00056134	0.000177055	-8.94976e-05	-0.000171472	5.61248e-05	-1.04971e-05
MR0492_TraceCoords	G33	-0.0538185	0.0317677	-0.00439101	-0.00880156	-0.00217674	-0.000751592	-0.00210432	-0.00528262	0.00278183	0.000890469	0.000837377	-0.000364191	-0.000177758	0.000208768	-0.00175156	0.000384985	-0.000890523	-0.000485645	0.000735271	-0.000438765	0.000182179	-0.000443419	3.00768e-06	-1.27239e-05
MR0495_TraceCoords	G33	-0.028839	-0.0188621	3.63251e-05	0.00317791	-0.00509141	0.00548349	-0.00401883	-0.00356503	-0.00107061	-0.0043621	0.00241934	-2.4915e-05	0.000113331	-0.000181	0.00051249	0.000746744	-7.88001e-05	-0.000361121	0.000290514	-0.000199334	0.000160584	-0.000410929	-0.000215367	-3.09237e-06
MR0501_TraceCoords	G33	0.119975	-0.024804	-0.0125582	0.00281636	0.00863136	0.00206672	0.00240352	0.000452113	0.00263321	0.00135712	-0.000322898	-0.00312439	-0.000426394	0.0015617	0.00121615	0.000927379	0.000633551	0.000292344	0.000446141	0.000290222	0.00043091	-1.90917e-05	7.63816e-05	-9.01744e-06
MR0503_TraceCoords	G33	0.0238805	0.0305647	-0.0220341	-0.00833618	-0.00890208	-0.0063808	0.00400241	-0.00367984	-0.000185519	-0.0013396	0.0026264	0.00244055	0.000540922	-0.000322936	0.000196296	0.000710361	-0.000941261	-0.000194353	0.000677891	0.000267953	0.000147876	-0.000112216	1.89076e-05	8.12237e-06
MR0506_TraceCoords	G33	0.0359494	0.0495049	0.00536278	-0.0110441	0.00204296	-0.0105852	-0.000434044	0.00475222	-0.00178275	-0.000798403	0.000719932	-0.000992634	0.0014731	-0.000651737	0.000334781	0.0014468	-0.00133015	0.00163798	-4.83722e-05	0.000495664	0.000210416	0.000468038	-0.000154577	1.56798e-05
MR0509_TraceCoords	G33	-0.0288539	-0.0177686	0.0176819	0.00470835	0.000278671	0.00151408	-0.00243319	-0.0026419	-0.00506366	-0.0032986	0.00199272	0.000583244	0.00117861	-0.000236112	-0.00127806	-3.89518e-05	0.000342281	0.000617436	-0.000142893	0.000337178	0.000717337	0.000267474	-0.000850006	-2.8158e-05
MR0510_TraceCoords	G33	0.0544559	0.0130519	0.0144287	-0.00995568	0.00378021	0.00281963	-0.00304776	0.000535264	-0.00206984	0.00247237	-0.000890858	-0.000130712	-0.000124647	-0.00180968	0.00026726	5.52385e-05	0.000482693	0.000557377	-0.000531122	-0.00057555	0.000175567	9.11347e-05	-0.000232403	1.07499e-06
MR0512_TraceCoords	G33	-0.000414743	-0.00897633	0.00196825	-0.00833619	-0.00455957	-0.00429395	0.00138131	-0.00203467	0.00202627	-0.000319719	0.00173332	-0.000788087	-0.00115627	0.000827901	0.00161829	-0.000247024	-0.000150874	-0.000347862	-0.000235649	0.000235829	-7.59774e-06	-0.00015833	-0.000151892	1.13218e-05
MR0514_TraceCoords	G33	-0.0466932	-0.0296548	0.00125919	0.00502745	-0.00204036	-0.00738828	-0.00313293	-0.00208281	-0.0003748	0.00142248	-0.00210001	0.00130479	7.8194e-05	-7.55491e-05	-0.000644425	2.28496e-05	8.22953e-05	1.1709e-05	0.000332972	-8.15469e-05	0.000138675	2.12589e-05	-2.10034e-05	2.28763e-07
MR0515_TraceCoords	G33	0.00705445	-0.0354273	-0.00132936	-0.000323801	-0.0048154	0.00288783	-0.00326552	-0.000994838	0.000841964	0.00101877	-0.00230922	-2.78367e-05	0.00158506	-0.000170546	0.000283679	0.000815175	0.000367082	-3.67927e-05	0.000227411	0.000201652	3.53556e-06	-5.11693e-05	-9.47536e-06	-7.21855e-06
MR0516A_TraceCoords	G33	-0.0239782	-0.00826852	-0.00426501	-0.00298624	-0.00698674	0.00779371	-0.0010559	-0.00259445	-3.96787e-05	-0.00134633	-0.00116559	0.000206601	-0.000682823	0.000349804	0.000410843	-0.000103169	-0.00011535	0.00012059	6.43203e-05	-0.000176593	0.000201371	0.000233101	-0.000161223	-1.77968e-06
MR0520_TraceCoords	G33	0.0202159	-0.0212635	0.00311324	0.000927128	-0.00370791	0.00110567	-0.00384277	-0.0068409	0.00337146	-0.00221998	0.00337029	-0.00146348	0.000195423	0.000245932	0.00124806	-0.000247485	9.10366e-05	-0.000196833	5.83558e-05	0.000144974	-0.000182157	-5.10622e-05	0.000114342	-3.19883e-07
MR0523_TraceCoords	G33	-0.0271889	-0.0125623	0.00641022	-0.00656409	-0.00247651	0.000761615	-0.00522143	-0.000894179	0.00356709	0.00132976	0.0025577	-0.00118335	0.000505413	0.000177323	0.00144476	-0.000291012	-0.000142006	2.8384e-05	0.00021082	-0.000157105	-6.40954e-05	-2.42752e-05	-7.12183e-05	1.81389e-05
MR0524_TraceCoords	G33	-0.0432733	-0.0151618	0.0159829	0.00255826	0.00176425	-0.0103726	-0.00363942	0.00546292	-0.00243498	0.00214897	0.00493713	-0.000983567	-0.00255344	0.00184241	0.00125966	0.000553976	-0.000113841	0.000530988	0.000214244	0.000233587	-0.000189414	1.57861e-05	-0.000183579	1.99769e-05
MR0527_TraceCoords	G33	0.112554	-0.00269696	-0.00459574	-0.00126348	0.0091549	0.000651634	-0.00175604	-0.0031207	0.00107642	-0.000247922	0.00117435	-2.77325e-05	-0.00201039	0.000120723	0.000683924	-0.000217305	-1.23726e-05	-0.000240117	-0.000485277	0.000405391	0.000216762	-0.000231717	0.000119891	6.4119e-06
MR0528_TraceCoords	G33	-0.0282742	-0.0105814	0.00554382	-0.0170653	-0.00137013	-0.00226395	-0.00588973	-0.00102784	0.00133375	-0.000183794	-0.000811305	0.00110853	0.000266939	0.000378785	0.000190885	-0.000496525	0.000261079	-0.000222289	0.000244619	3.98657e-05	0.000105613	4.35178e-05	9.34717e-05	-1.41883e-05
MR0529_TraceCoords	G33	0.023419	-0.00101149	0.00343536	-0.00119783	-0.00438913	0.00577353	-0.000903717	-0.00433564	0.00171067	0.00148933	0.00092581	0.000129301	0.000395602	-2.88081e-05	0.000968808	-3.54781e-05	-0.000151874	0.000155457	0.00028641	6.45919e-05	0.000159684	-2.91398e-05	2.46166e-05	7.40622e-06
MR0532_TraceCoords	G33	0.101959	-0.0117899	-0.00825906	-0.00474229	0.00521252	-0.00295777	0.00363517	0.000168446	0.000531647	-0.00244597	-0.00205167	-0.000984817	0.000115701	-0.000278143	-0.0017593	0.000534863	-0.000415702	0.000467546	0.000124777	-0.000321192	-0.000213824	-0.000312394	-0.000348902	1.283e-05
MR0533_TraceCoords	G33	-0.00840778	-0.0198539	0.0117771	0.000672137	-0.00182267	-0.00268624	-0.00188881	-0.00158791	0.00258665	0.00116418	0.000335879	0.000341882	-0.0023123	0.000444595	-0.000391756	-0.000399564	-0.000428931	0.000455027	0.000234047	-3.77542e-05	-0.000361769	0.000160781	8.23924e-06	-6.63358e-06
MR0534_TraceCoords	G33	0.0980476	-0.0125701	-0.015762	-0.00430935	0.00244831	-0.00367413	0.000624788	-0.00107414	0.000770265	2.86451e-05	-0.000607753	-0.000869052	0.000303593	0.000600079	-0.000302076	0.00152277	-0.000483904	-0.000146895	0.000466825	-0.000101348	-0.000100611	0.000140972	0.000132178	1.24277e-06
MR0536_TraceCoords	G33	-0.0435373	-0.0110441	-0.0220152	0.00465951	-0.0111818	0.0103378	0.00717158	0.000865031	-0.00459184	-0.00145812	-0.0029084	0.000395338	-0.00163168	0.000201644	-0.000691287	0.000131051	5.2215e-05	-0.00034755	-0.000517063	0.000233162	-0.000100906	0.00012731	0.000181078	1.40786e-05
MR0539_TraceCoords	G33	0.0688273	-0.0327973	0.00556008	0.00908591	0.00289365	-0.00245208	8.28515e-05	-0.00467726	0.000331766	-0.00394083	0.001306	-0.00281273	2.18828e-05	-0.000518906	0.000829773	-8.11437e-05	5.62493e-05	-0.000354897	-0.000551724	0.000660953	-0.000629407	-8.18503e-05	0.000477892	-7.44851e-06
MR0540_TraceCoords	G33	0.0819244	0.00324319	-0.029039	0.00211093	-0.005453	-0.00162927	0.0043976	0.00309187	0.00129026	0.00315087	0.00223286	0.00146659	0.00131412	0.00202921	0.000990216	1.30425e-05	-0.000697975	-9.91768e-05	0.000295018	0.00028271	0.000197321	-0.000423074	-0.000148928	1.15539e-05
MR0543_TraceCoords	G33	0.0815903	-0.000842963	-0.00903159	-0.00150308	-9.95628e-05	0.00147363	-0.000262052	0.00343685	-0.00189118	0.000242084	0.000588325	0.000265507	-0.00107343	0.000491145	0.000389947	0.000751	0.000583377	0.000263299	7.64241e-05	-0.000401002	5.48144e-05	-0.000392038	-7.20422e-05	3.51608e-05
MR0545_TraceCoords	G33	0.00550688	-0.014215	0.0107062	-0.00773467	-0.0013968	-0.00250424	-0.00433475	0.000145475	0.00198989	-0.000934965	-0.000688784	0.000381558	-0.000693161	9.49909e-05	0.000771271	0.00028417	0.000365985	-0.000104926	0.000130708	0.000115517	-2.89862e-05	8.81296e-05	1.84352e-05	1.27295e-05
MR0546_TraceCoords	G33	-0.0454705	-0.0483628	0.00357109	0.00134088	-0.000148135	-0.000707534	-0.00296701	0.00124896	0.00156096	-0.000915593	0.000523084	0.00187383	-0.000981331	0.00224712	-2.77426e-06	-0.000531973	-0.000297031	0.000471744	0.000237365	-2.77505e-05	-0.000513081	-8.28626e-05	-0.000157663	1.55733e-05
MR0548_TraceCoords	G33	-0.0774488	-0.0378413	-0.00292632	0.0107509	0.00110798	-0.00370154	-0.00281232	-0.00171876	-0.00012144	-0.000700919	0.00119654	0.00200938	-0.00226563	-8.19944e-06	-0.000485556	-8.48767e-05	-0.000403306	0.000723459	0.000167276	-0.000335305	-0.000446281	0.00037064	-0.000255823	5.45737e-06
MR0549_TraceCoords	G33	0.018371	0.0102138	-0.00574623	-0.00308781	-0.00724029	0.00535809	0.00189017	0.00202623	-0.000593924	-0.00249735	0.00104169	-0.000314862	0.000699367	-0.000818447	0.00186578	0.00012891	-6.08296e-05	3.88769e-05	0.000436229	-0.00012217	-0.000280427	7.76284e-06	-5.67056e-05	-4.07467e-06
MR0550_TraceCoords	G33	-0.0564529	-0.0235206	0.0142594	0.00249194	0.00269579	0.00194298	-0.00845819	0.000998392	0.00155835	-0.00311299	0.000441405	0.00260577	2.24387e-05	0.000119197	-2.89543e-05	0.000179676	-0.000291775	0.000122884	0.000255515	-0.000105716	0.000270066	-0.000164941	6.94621e-05	-2.133e-06
MR0551_TraceCoords	G33	-0.0891773	-0.0413414	0.00151137	0.00418575	0.00556808	-0.000615691	-0.007524	0.0041121	0.00239791	-0.000377366	0.000943781	0.00285737	-0.000682092	0.00111177	-0.0010267	-0.000931655	-0.000961894	0.000281246	-0.000275546	-9.55746e-05	3.86386e-05	-0.000183872	4.53437e-05	-2.24706e-05
MR0552_TraceCoords	G33	0.0401989	-0.0219586	-0.0130395	0.000411154	-0.00753784	0.00462336	0.00146678	0.00248268	-0.00443604	-0.00234909	-0.000364226	-0.00119311	0.000635769	0.000258179	-0.00121138	0.00101889	0.000953325	0.000399112	0.000226299	-0.000548329	-0.000260088	-0.000116323	0.000284152	1.89833e-06
MR0554_TraceCoords	G33	0.0801016	0.0109778	-0.00592329	0.000541538	0.00150981	-0.00112985	-0.00747719	0.00137136	-0.000531063	0.00082071	-0.00142728	0.00102525	0.000455014	7.68482e-08	0.00126447	0.000108121	0.000410247	-0.000528903	8.52065e-05	-0.000146765	-0.000226196	-1.84412e-05	4.83463e-06	-3.8835e-06
MR0556_TraceCoords	G33	0.066542	-0.0131513	-0.0103289	-0.0160588	-0.00237677	0.00778478	0.00144906	0.0011569	-0.000753446	0.00018663	-0.000583733	-0.000289742	0.00171504	0.000812653	-0.00010647	0.00146713	0.000830366	0.000968071	-0.000447419	0.000142796	-0.000127169	0.000192911	-0.000100316	1.41106e-06
MR0557_TraceCoords	G33	0.0973519	-0.0156702	0.00890987	0.0158369	0.00739244	0.016042	0.00673538	0.00160679	-0.00221866	-0.00218665	-0.00111457	-0.00115277	-0.000482176	-0.00211052	0.000492765	-0.00254316	0.00143226	0.000671608	0.000194758	3.74038e-05	-5.99912e-05	-0.000117014	0.000351699	-2.00905e-06
MR0558_TraceCoords	G33	-0.0315431	-0.0190496	0.00239256	-0.000608532	-0.00398139	0.00283601	-0.00372143	-0.000533794	-0.00114367	-0.00126862	3.66747e-05	0.000123815	-0.000272861	0.000244304	0.000255231	7.91851e-05	-0.000292404	0.000157605	5.35845e-05	-5.6284e-05	0.000202814	-6.72146e-05	7.3846e-06	-9.02216e-06
MR0559_TraceCoords	G33	0.121302	0.00454282	0.000911676	-0.000479463	0.0136576	-0.00350639	-0.000229453	-0.00132466	-0.00242052	-0.000594885	0.000389306	-0.00124446	-5.68648e-06	-0.00135819	-0.00109489	-0.000351388	-0.000712977	-0.000539738	-0.00078611	8.03921e-05	6.45888e-05	2.7018e-05	-0.000112856	1.86651e-07
MR0560_TraceCoords	G33	-0.121996	-0.0148079	-0.00142768	0.00467171	0.0119684	-0.00963863	-0.00911201	0.00221629	-0.00136967	0.00201604	0.00536041	-0.000678068	1.66943e-05	-0.000730824	0.000799447	-0.000975682	-6.62041e-05	0.00112624	-0.000226099	0.000410429	-2.44468e-05	-4.83862e-06	-0.000831882	-2.92098e-06
MR0562_TraceCoords	G33	0.128935	-0.00929418	-0.0118389	-0.000431987	0.0122023	-0.000256397	-0.00176601	-0.00477461	-0.00181799	0.00325107	-0.000270278	0.00123569	-0.000291589	0.000832241	-0.000667242	0.000886126	0.000366184	-0.00116964	-0.00102072	-0.000291864	0.000327825	7.60097e-05	-6.67923e-06	-9.80662e-06
MR0565_TraceCoords	G33	0.0507041	0.0191945	0.00514845	0.0058852	-0.000452858	-0.00351863	-0.00421904	0.000913448	-0.00190043	-0.00136517	-0.00257534	-0.000359301	-0.000788635	5.51483e-05	0.000220552	6.75641e-05	-9.37068e-05	0.00030947	-7.04505e-05	0.000388448	-0.000191546	9.55387e-05	6.47489e-05	-4.02037e-07
MR0566_TraceCoords	G33	0.152166	0.0145438	-0.00873032	-0.0119293	0.0226833	0.0045536	-0.00277054	0.00169781	-0.00114241	0.00225904	-0.000100844	0.0047357	0.000105022	-0.00131707	6.92087e-05	0.000732683	0.000537608	-8.82388e-05	-0.000917224	-0.000629535	-0.000542092	0.000263089	-0.000161009	-4.72203e-06
MR0571_TraceCoords	G33	-0.018091	-0.0168966	0.00259773	0.0060412	-0.00553233	0.00585683	0.00110169	0.00230396	-0.00445842	0.0016954	-0.000658588	-0.00104507	0.0028573	-0.00165514	0.000658739	0.000643213	0.0002425	-9.49017e-05	0.000476107	-0.000253977	0.000104453	0.000299094	0.000286004	-8.96287e-06
MR0572_TraceCoords	G33	0.0365359	-0.012836	-0.0119208	0.00823252	-0.00803835	0.000635564	-5.23775e-05	0.00264237	0.00195401	0.00177245	0.00108117	-0.000784786	-0.00160799	0.000537373	-0.00166669	0.000544575	0.000564874	-0.000565893	0.000173485	-0.000191418	-6.81409e-05	9.71955e-06	-6.81582e-05	-1.05355e-05
MR0573_TraceCoords	G33	0.0923977	0.0114813	0.00770282	-0.0345106	0.0143	-0.00353009	-0.0158136	0.00331309	-0.00225537	-0.000631138	0.000590365	0.0020693	-0.00289603	-0.00396775	0.00182721	0.00426078	0.000965443	-0.00144803	-0.00087367	-0.00122773	-0.00011018	0.000606516	0.000459979	-2.63071e-06
MR0575_TraceCoords	G33	0.0196609	0.0248286	-0.00821274	0.0137713	-0.00808158	-0.00167532	0.00497311	-0.00241924	-0.00185925	0.00138154	-0.00160037	0.00252308	-0.000125205	-0.000511156	-0.00156265	-0.000179881	-0.000619378	0.000667368	0.000429735	-0.000629438	-0.00040832	0.000165951	0.000366084	7.79793e-06
MR0576_TraceCoords	G33	0.045022	-0.0167098	0.00104982	0.00308525	-0.00238282	-0.00827176	0.000536508	-0.000764498	0.00382063	0.000182564	-0.000334639	-0.00244573	-0.000211872	7.81758e-05	0.000367699	-0.000144074	-0.000356436	-0.000223053	0.00027087	-5.29881e-05	0.000182072	5.76689e-05	3.83268e-05	8.17076e-07
MR0577_TraceCoords	G33	-0.0346526	-0.0287699	0.000625026	0.000871212	-0.00326434	-0.00635732	-0.00139145	0.000163545	-0.000502357	0.00167172	0.00515191	-0.0012807	0.000629816	-0.000691708	-0.000204151	-0.000199042	0.000358917	2.47246e-05	5.01281e-05	-0.00016278	-0.000716567	0.00026084	6.94836e-06	-2.96564e-06
MR0578_TraceCoords	G33	0.0158061	-0.0163217	0.00671534	0.00144731	-0.00367089	0.0034874	0.000293548	0.00115336	-2.18581e-05	0.00279667	0.00090016	-0.00111161	0.00100901	-0.000889386	0.000366584	0.000117315	-4.64397e-05	-9.97456e-05	4.24667e-05	-0.000221464	0.00016419	3.2988e-05	0.000104252	1.75044e-05
MR0579_TraceCoords	G33	-0.0212566	0.00265108	0.00258529	0.00527694	-0.00505115	0.000634749	-0.00448775	-0.000885166	0.00248184	-0.000795635	0.00172368	-0.00064469	-0.00180592	-0.000376642	0.000225365	0.000145568	-0.000143069	-0.000242926	0.0002133	-0.000288114	0.000155347	0.000229547	8.5016e-05	9.49442e-06
MR0580_TraceCoords	G33	-0.0758018	-0.023031	-0.0024228	0.0133452	-0.000767015	-0.00722285	0.00855379	-0.00232118	0.00185561	0.00227754	-0.00329771	0.00204571	0.00169059	-0.00128811	-8.30314e-05	8.8207e-05	0.000764562	0.000380145	-0.000671801	-0.000296885	-0.000145632	0.000432193	8.48655e-05	-5.31327e-06
MR0581_TraceCoords	G33	0.0143509	0.0233841	-0.00311635	0.00202594	-0.00518297	-0.00279115	-0.00917404	0.000685663	0.00235259	0.00103462	-7.63502e-05	0.000520304	-0.00232176	0.000586519	0.00115971	7.79368e-05	-0.000193926	0.0004395	-5.67343e-05	-0.0004742	0.00059602	-0.000822229	-6.15599e-05	-5.70273e-06
MR0585_TraceCoords	G33	0.02305	0.0102643	0.0128246	-0.0121165	0.000260121	-0.00513567	-0.000366333	-0.000278401	0.00124599	-0.00129267	0.000245891	-0.000308135	0.00182596	-0.000393968	-0.000270867	-0.000162671	5.87412e-05	-0.000160448	-0.000373397	-4.31738e-05	0.000169278	8.65619e-05	4.29218e-05	-2.29416e-05
MR0586_TraceCoords	G33	0.0668689	-0.00321569	-0.00549944	-0.00586026	-0.00148038	0.00304821	-0.000550956	-0.00229237	-0.000932118	-0.0029204	0.00157539	-9.33535e-05	-0.000741298	-9.81484e-05	-0.000603097	0.000282013	0.000484282	0.00019188	-2.54025e-05	0.000147767	-0.000357924	-0.00024894	-2.71546e-06	-4.90489e-06
MR0588_TraceCoords	G33	-0.0318046	0.0152171	0.00107183	-0.0119903	-0.00359028	0.00311956	-0.00243003	-0.0033441	0.00235406	0.00289062	0.00292667	-0.0014573	-0.000632606	0.000318867	-3.37004e-05	-3.58852e-05	7.11146e-05	4.95376e-05	2.45988e-06	-0.000353882	5.60864e-05	2.86426e-05	0.000136689	8.61903e-06
MR0590_TraceCoords	G33	-0.00497353	-0.0123966	0.00403939	-0.00767822	-0.00387306	-0.00694533	0.00336113	0.000633859	0.000174845	0.00332258	-0.00108013	2.7991e-06	0.00143339	-0.00031503	-1.0559e-05	-0.000172337	3.2598e-05	-0.00016766	-0.000200058	-1.44337e-05	7.57578e-05	3.0914e-05	3.83807e-06	7.83254e-06
MR0593_TraceCoords	G33	0.0515325	0.0276693	-0.00484895	-0.00125761	-0.00219937	-0.00153402	-0.00436257	-0.00565371	0.00167405	0.00260079	0.00242491	0.00115764	0.00201282	-0.000175177	-0.000438603	-0.000840079	-0.000146149	-0.000405027	-5.92778e-05	-9.51032e-05	7.67939e-05	-1.15171e-05	7.32931e-05	6.24142e-06
MR0602_TraceCoords	G33	-0.0653154	-0.0489303	0.00518686	0.0157042	0.00273985	0.000296707	-0.00646848	0.000209448	-0.000466608	0.00127845	-0.000709609	0.00348596	0.00177261	-0.000603386	0.000596107	0.000759097	-0.00137068	0.000444168	0.000468965	-1.49759e-05	0.000141056	-0.000123545	-4.24743e-05	-1.60953e-05
MR0603_TraceCoords	G33	-0.00058466	0.0123446	0.00335282	0.0210517	-0.00598784	0.000273506	0.00136381	0.00104431	-0.00181695	0.00403649	0.000760386	-0.000696696	0.00166998	-0.00180904	-0.000433871	0.000449072	0.000166356	-0.000304294	-7.88853e-05	-0.000381351	0.00032328	0.000330655	0.000253333	-1.05417e-06
MR0608_TraceCoords	G33	0.0199204	-0.00230493	3.66082e-05	0.0128612	-0.00595888	0.00358286	-0.00427703	0.00192954	0.00244426	0.00189334	-0.000225365	-0.000844431	0.000756432	-0.000782005	0.00183751	-0.000191295	-0.00024916	-0.000478071	0.000384835	0.000161623	0.000110799	-0.000160636	-5.33701e-06	4.89252e-06
MR0609_TraceCoords	G33	0.0734326	0.00714084	-0.0121308	0.00808087	-0.00276257	-0.000306956	-0.00128818	-0.000763971	-0.00218992	0.00100917	-0.00247346	0.00251843	-0.000641065	0.00111116	-0.000306343	-0.0010759	0.000398779	-0.000189302	-5.53266e-05	-0.000429941	-7.00262e-05	2.76405e-05	-0.000151206	1.19399e-06
MR0610_TraceCoords	G33	-0.067648	-0.0203942	-0.0006692	-0.00767928	0.00010157	0.000657463	-0.00325243	0.000513205	-0.00396125	0.00602551	0.00355792	0.000154955	0.00011677	0.000749742	0.000864859	-0.000618833	-0.000468177	-0.000147247	0.000317744	0.000500544	-0.000190485	-0.000236684	-0.000129574	-3.68332e-06
MR0612_TraceCoords	G33	-0.057041	0.00657726	-0.00636163	0.00368295	-0.00532938	0.0100482	0.00078938	-0.00660102	0.00402732	0.000808456	-0.00214171	0.00190142	-0.000540302	-0.000396224	-0.000692978	0.000673687	-0.000151121	0.00013339	-0.000252465	-0.000451481	5.40539e-05	0.000213059	-0.00025269	-6.47022e-06
MR0613_TraceCoords	G33	0.052527	-0.0143604	0.00362869	-0.00264054	-0.001239	0.00599699	0.00225538	-0.00402181	-0.00225264	0.00376176	-0.000309946	-0.000752216	-0.000454559	-0.000309024	0.000977417	5.02389e-05	0.000441553	0.000211044	-0.000155421	0.000139152	0.00036934	0.000256608	-9.2871e-06	5.19359e-06
MR0614_TraceCoords	G33	-0.0393475	0.0204527	0.00407492	-0.000494311	-0.00263607	-0.00769293	0.00326462	-0.00292941	0.000508107	0.00140072	-0.00155222	-0.00144237	0.00308894	-0.0010418	-0.0014722	0.000108266	0.000205316	0.000144047	-4.97733e-05	-6.39319e-05	0.000180182	-0.000281582	9.75511e-05	-6.59972e-06
MR0615_TraceCoords	G33	0.0226283	-0.0296593	0.0167513	-0.00336516	0.00206266	-0.00186295	-0.00631603	-0.00043884	-0.00195288	0.00410404	0.00337219	0.000726032	-9.28425e-05	0.000572114	0.000114465	0.000434411	-4.83589e-05	-0.000199325	0.000988679	0.000659825	-5.30127e-06	0.000153016	-0.000179775	-1.98391e-06
MR0619_TraceCoords	G33	-0.00833409	0.00671491	0.00636502	-0.00266521	-0.00348003	-0.0118357	0.00525725	0.00804564	0.00236503	0.000650446	-0.00209325	0.00076423	-0.000362682	0.000186996	0.000167229	0.000442086	-8.12317e-05	-0.000165114	-0.000225184	0.000132028	-5.13458e-05	-5.50176e-05	5.18271e-05	-2.49748e-06
MR0620_TraceCoords	G33	0.070728	0.0193337	-0.00559125	0.00363741	0.000330785	-0.00457265	-0.00886511	0.000406995	-0.00100447	0.000111455	-0.00181613	0.00105038	-0.00167861	0.000133458	0.000254827	-0.000844353	0.000445045	-0.000282739	-0.000293377	-5.98333e-05	0.000216041	-0.000283818	0.000176909	-1.97709e-06
MR0621_TraceCoords	G33	0.00715367	-0.0171239	0.00844457	-0.0140284	-0.00105674	-0.00473344	-0.00492073	0.00206424	-0.00516979	-0.0023489	-0.000460908	-9.26972e-05	-3.33142e-05	0.0008327	-0.00110871	6.10188e-05	0.000123048	-0.000801199	0.00062653	0.00030211	-0.000345425	0.000261639	8.7272e-06	-1.665e-05
MR0630_TraceCoords	G33	0.0378628	-0.0240165	0.00857124	-0.0221941	0.00163038	0.0104035	-0.00537864	0.00302114	-0.00659692	0.00031273	-0.000392984	0.000655129	0.00193437	-0.000553994	0.00152128	0.00119406	0.000392492	-0.000157276	-0.000524836	3.72935e-05	-0.000379132	-2.52256e-05	7.78275e-05	-1.41143e-05
MR0635_TraceCoords	G33	0.0110119	-0.042687	-0.0107328	0.0130865	-0.00769847	-0.00456529	0.00326902	0.00133423	-0.00119807	-0.00325578	0.00118914	-0.0036601	-0.000671923	0.00183648	0.000995124	0.000675425	0.00030779	0.000569047	0.000279078	-0.000888963	-6.06204e-05	-0.000189119	-8.60914e-05	-1.6017e-05
MR0637_TraceCoords	G33	0.039393	0.0294632	-0.012525	-0.00606561	-0.00531982	-0.00446596	-0.00327664	0.00379987	-0.00620164	-0.00472429	0.00126862	0.000774253	0.00101981	-0.000268752	-0.00216971	0.000419839	0.00037576	0.000264129	-0.000256885	-5.85599e-05	0.0006628	0.000268778	-0.000538447	-1.82294e-05
MR0638_TraceCoords	G33	-0.0366457	-0.00822446	0.0290075	-0.00632945	0.00602239	-0.0119649	0.00192193	0.000642169	-0.000306167	-0.000408669	0.000559793	0.00482216	0.00350605	0.00274431	0.000525993	-0.00165784	0.00126362	7.81884e-05	-0.000590623	-0.000162351	0.000214573	-0.000293403	8.22194e-05	4.40913e-06
MR0642_TraceCoords	G33	-0.0655706	-0.0135717	0.00321462	0.00190764	1.63243e-05	0.00326507	-0.00727112	-0.00287222	0.000332968	0.00217011	0.000434585	0.00176084	-0.000291404	-0.00045381	7.63699e-05	0.000402892	-0.000678047	-0.00010913	0.000259202	6.07247e-05	2.17166e-05	-0.000101687	-9.94155e-05	1.52304e-05
MR0647_TraceCoords	G33	0.0109735	0.0127307	-0.00802154	0.00770453	-0.00798846	8.39211e-05	-0.00428821	-0.00178672	0.000325063	0.00125794	-0.00268539	0.00231554	-0.00121547	3.82553e-05	0.00140791	0.000301998	4.28334e-05	-0.000195198	4.33622e-05	-2.59879e-05	9.12983e-05	5.08057e-05	-6.9595e-06	1.61513e-05
MR0649_TraceCoords	G33	-0.0207772	-0.00544146	0.0145959	-0.00277244	-0.00111184	-0.00529777	0.00474492	0.00173915	0.000980345	0.00309679	0.0011813	0.000383864	-0.000584062	0.000905532	0.000741076	-0.000274274	-0.00022613	7.7688e-05	0.000251815	8.16695e-05	-0.00015651	0.000149286	0.000118906	-1.87052e-05
MR0653_TraceCoords	G33	0.0255351	-0.00143834	0.00366063	-0.00868643	-0.00350496	0.00877064	0.00167707	-0.00963038	-0.00368177	-0.00272639	-0.000663294	0.00178846	0.00213418	-0.000538978	0.00177737	0.000230255	-0.000134246	-0.000197663	-0.000552822	0.000129757	-2.19813e-05	-0.000153447	-7.66966e-05	7.73433e-06
MR0654_TraceCoords	G33	-0.00268905	0.0295937	-0.000392012	0.00632103	-0.00551167	0.00159296	-0.00239987	-0.00136395	-0.000864817	-0.000840767	0.000681764	0.000330539	-0.000155082	-0.000255014	0.000417276	1.28206e-05	0.000375036	6.33552e-06	-0.000300425	0.000129819	-7.08861e-05	8.5785e-05	0.00016089	1.21605e-05
MR0656_TraceCoords	G33	-0.0109624	-0.00433163	-0.00406968	-0.00434975	-0.00737202	0.00344465	0.00230452	-0.00103862	0.00143569	-0.00100138	-0.000520514	0.000414834	-0.00126764	-0.000139555	-0.000341088	0.000802956	-1.30869e-05	3.25462e-05	-0.000209286	0.000181902	0.000128728	0.000218344	-0.000178073	-1.16111e-06
MR0660_TraceCoords	G33	0.0671902	-0.0208495	-0.0139105	-0.00646999	-0.00420597	0.00609682	0.00637514	-0.00196224	-0.00162209	-0.000289439	-0.0012326	-0.00121528	-0.000876569	0.00183162	0.000245379	0.00106353	0.000342849	0.0014951	-0.000364322	-1.33332e-05	-3.52646e-05	8.55283e-05	-3.23861e-05	-9.81256e-06
MR0661_TraceCoords	G33	-0.0164497	-0.0208472	0.00345926	-0.000781229	-0.00380617	-0.00572321	-0.00268142	-0.00108191	0.00172697	0.000303671	0.000555447	-0.000382763	-0.000413714	0.000607078	0.000147951	-0.000883495	0.000171917	-9.44976e-05	5.86059e-05	-0.000209413	-0.000270161	0.000261047	-1.32089e-05	7.57218e-07
MR0663_TraceCoords	G33	0.151618	0.00206264	-0.0153137	0.0104322	0.0187809	-0.00661565	-0.00245763	0.00114184	-0.000348767	0.00186719	-0.000338605	-0.00186159	0.000430948	0.0036984	0.00039619	-0.00113159	-0.00110451	-0.00177928	8.74091e-05	-0.000140934	0.000372514	0.000342138	-5.72588e-05	1.83596e-07
MR0667_TraceCoords	G33	0.139478	-0.00101641	-0.0268135	-0.0119163	0.0123988	0.00241458	-0.00333027	0.00463867	0.000987664	-0.000142367	0.00321119	0.00170153	0.00156067	0.00124601	-0.00106324	0.00231859	0.000975448	-0.000512562	0.000150882	-0.000254315	-0.000606518	6.82807e-05	5.38308e-05	6.29326e-06
MR0668_TraceCoords	G33	0.100389	-0.0034015	-0.0127423	-0.0101981	0.00345689	0.00712433	0.00155586	0.00348305	0.00109625	-0.000369299	-0.00131989	-7.50034e-05	0.000494052	8.68689e-05	-0.000230792	-6.53574e-05	0.000234753	0.000857204	0.000144182	0.000277797	-0.000368188	-0.000246648	-0.000258296	2.74496e-05
MR0670_TraceCoords	G33	0.0532441	-0.0139837	0.0170773	-0.00718202	0.00393105	-0.00397459	0.00375717	0.00255733	-2.54132e-05	-0.000172559	-0.000509367	-0.000145299	-0.000235887	-0.000718273	-0.00183488	-0.000119526	0.000117907	0.00017881	0.000312113	-0.000164752	-7.10491e-05	-7.12577e-05	3.16775e-05	1.99937e-06
MR0673_TraceCoords	G33	0.0428934	-0.0126614	-0.0157757	-0.00784918	-0.00773214	0.00630489	0.00215307	-0.00773044	-0.000130396	0.000483448	0.000903713	-0.000190039	0.00212231	0.00104755	0.000146762	0.00102445	0.000978837	0.000752307	-0.000601669	0.000341983	-1.36828e-05	0.000131398	-0.000188293	1.98001e-05
MR0675_TraceCoords	G33	0.0177804	-0.0181595	0.00153233	0.00131519	-0.00472203	0.00162334	-0.00349953	-0.000431627	0.000902365	0.000166999	0.000569975	-0.00108533	9.94697e-05	-0.000360989	0.000356441	0.000482735	-5.03538e-05	4.09084e-05	0.00015981	-7.67013e-05	-0.000145923	5.28979e-05	3.88891e-05	8.56795e-06
MR0676_TraceCoords	G33	-0.0224323	0.0167758	0.0119181	0.0037005	-0.00245275	0.00443061	0.00173972	-0.00511559	0.00186982	-0.0018651	0.000563157	-0.000887333	-0.000680466	0.00106625	0.00117885	-0.000300184	-0.000597096	0.000121135	-6.01713e-05	0.000141462	-0.000163447	3.95503e-05	9.5155e-05	-2.52055e-05
MR0679_TraceCoords	G33	0.0541932	0.023942	-0.00465563	0.0021484	-0.00253798	-0.00665823	0.000369507	0.00291913	-0.00207324	0.00177092	0.000453105	-0.000548783	-0.000583212	0.000220509	0.000924825	0.000120035	-0.00114135	0.000623634	0.000171563	-8.34142e-05	2.9762e-05	0.000304055	0.000213538	-9.44437e-06
MR0682_TraceCoords	G33	-0.072592	0.0206565	0.00235288	0.00493871	0.000933201	-0.00263702	-0.00509671	-0.0010578	-0.000642386	0.000218789	0.00122515	-0.00201613	0.000825563	-0.00114347	5.34658e-05	0.00051203	0.00030782	0.000340277	0.000353699	4.89009e-05	0.000178631	1.74822e-05	-5.89616e-05	-6.32226e-06
MR0683_TraceCoords	G33	0.156223	-0.021362	-0.0234635	-0.011129	0.020134	-0.00470048	-0.000103772	0.000153522	-0.00430111	-0.000945314	-0.000234194	-0.00148108	-0.000893206	0.00188125	-0.00206677	0.00411019	-0.000366129	-0.000388015	-0.000963371	-0.00137383	-0.000408146	-0.000588707	-4.12617e-05	2.65303e-07
MR0684_TraceCoords	G33	0.0698641	0.000604599	-0.0111177	0.00848398	-0.00226191	-0.0106094	-0.00230994	-0.0033536	0.00184966	0.00231455	0.000721945	-0.00237418	0.000648136	0.000628191	-0.000552149	-0.000794635	-0.00104722	-0.00122342	7.72705e-05	0.000200054	0.000272649	0.000187495	-7.18221e-05	1.02657e-05
MR0688_TraceCoords	G33	0.0362332	-0.0213427	0.010362	-0.015391	0.00145403	-0.00380059	-0.00206649	0.00209163	0.00165587	0.00273933	0.000668902	-0.000122572	0.00178887	-0.000505994	0.00200055	1.94908e-05	0.000443822	-0.00014736	8.2414e-06	-0.00059186	-0.000106879	0.000528156	0.000129518	-1.15501e-05
MR0689_TraceCoords	G33	0.047417	-0.0251708	0.0137346	-0.000869086	0.00253347	-0.00305748	-0.00174483	-0.00332515	0.00115685	-0.00210307	-0.000861391	-0.00014619	-0.000746634	-0.000189703	0.000505147	0.000414714	0.00048445	-0.000359918	-8.50037e-05	0.000343111	8.98568e-05	-0.000159663	-0.000113298	3.763e-06
MR0692_TraceCoords	G33	0.0322398	-0.0187719	-0.00244644	0.00106873	-0.00444113	-0.00978275	0.00291812	0.00164652	0.00264797	-0.00200994	-0.000159618	-0.000830759	0.00011125	-2.2047e-06	0.00224553	0.000179697	0.00020154	-0.00010374	7.68295e-05	-0.000442241	0.000478413	-0.000306249	5.10211e-06	2.5897e-06
MR0695_TraceCoords	G33	-0.0930417	-0.0116587	-0.0159102	-0.0120781	0.000426021	-0.00382799	0.00444125	0.00148124	-0.00169429	0.00557847	0.00107813	-0.000923909	-0.0022979	0.000219154	-0.000608374	-0.00133423	0.000684936	-0.000342899	-0.000216573	0.00101627	-0.000319753	-0.000149742	-0.000153535	-3.10196e-06
MR0701_TraceCoords	G33	0.0346344	0.0132605	0.0114758	0.000146477	-0.000307203	-0.00389032	0.00114759	-0.00379498	0.00149121	0.00319686	0.000737408	-0.00210889	0.00232315	-0.000945192	0.000809551	-0.000227861	-0.000959022	-0.000219042	-2.22383e-05	-0.000107511	0.000107774	0.00015747	-2.53483e-05	9.87773e-06
MR0702_TraceCoords	G33	0.0213693	-0.0388027	0.0103818	-0.00284945	0.000518511	-0.00670079	-0.00299094	-0.00151995	-0.000735639	0.00176852	0.00136175	0.000326699	0.000977486	0.000671716	-0.00134446	-0.000108184	0.000414546	-0.000130895	0.000238918	-7.0062e-05	-0.00010727	6.07026e-05	-4.98328e-05	-1.13914e-05
MR0706_TraceCoords	G33	-0.10176	-0.017393	-0.0087316	0.00456594	0.00294601	0.00630797	-0.0030423	-0.000570718	0.00304843	-0.000324651	-0.00058317	0.0011715	0.000844891	-0.00107016	0.00167999	0.000467576	-0.000778488	0.000378562	-9.4906e-05	3.57515e-05	0.000516546	-0.000303077	-7.3644e-05	-2.56308e-05
MR0712_TraceCoords	G33	0.00829957	-0.0391047	-0.0070222	-0.00689276	-0.00501395	-0.00587338	-0.00314282	0.0028043	-0.00369181	0.00423319	-0.00333064	-0.00247353	0.000316202	0.00194428	-0.000429304	0.00036625	5.87914e-05	-0.000289	1.84248e-05	-0.000268774	1.76939e-05	-0.000507252	-0.000201368	-1.3818e-05
MR0713_TraceCoords	G33	0.175788	-0.0339595	0.00785156	0.00174379	0.0371643	0.00643659	0.00792242	0.0014029	0.00260823	-0.00136655	-0.00123267	-0.00387839	-0.00190871	-0.00376043	-3.99777e-05	0.000303711	0.00190121	0.000122717	0.000419629	0.00144916	0.000167001	-0.00112249	2.37668e-05	1.46002e-05
MR0714_TraceCoords	G33	0.071668	0.00687616	0.00724589	0.00972923	0.00275903	-0.000599081	-0.00275168	-0.00160493	-0.000979266	-0.000181443	-0.00017071	-0.00117468	0.000671687	-0.000922337	-0.0003329	-0.00138715	-0.000165737	-0.000349813	-0.000291084	0.000361134	9.61658e-06	0.000174543	0.000160235	1.30468e-05
MR0715_TraceCoords	G33	0.0334334	-0.0168973	0.00524859	-0.00118811	-0.00250042	0.00306733	-0.00203284	-0.0013086	-0.00405176	0.00122937	-0.000550251	-0.000593178	0.00198212	-0.000356898	0.000623726	-0.000107238	0.000205732	0.000566227	0.00039155	0.000723193	-0.000125174	-0.000395845	0.000437218	-9.7068e-06
MR0716_TraceCoords	G33	0.0609228	0.0232004	0.00314538	-0.00934529	0.00100171	6.73621e-05	0.00448911	0.000724696	0.00130507	-0.000475497	-0.00040639	0.000395763	0.000798756	-0.00185741	-0.000225093	-0.000318539	-0.000904814	0.000954614	0.000124815	-0.000184188	-0.000156833	3.73735e-05	-0.000122363	1.30548e-05
MR0720_TraceCoords	G33	-0.0754424	-0.00329548	-0.0031564	0.0170481	-0.00203056	0.00438796	0.000194008	-0.00514223	-0.000104758	-0.00247203	-0.0003344	0.000838066	0.00213683	-0.00243725	-0.000659739	0.00085525	-0.000280001	0.000693726	-0.000262562	-0.0010781	0.000443088	0.000949817	-8.64198e-05	-2.01565e-05
MR0721_TraceCoords	G33	0.00778689	-0.0330992	0.000580388	-0.0158804	-0.00307399	-0.00337357	0.00122427	0.00279833	-0.00028805	0.00263258	0.00125579	-0.000187987	0.00022388	0.00160027	-0.000758245	0.000351648	4.23913e-05	-0.000179323	0.000164244	0.000320254	-6.18127e-05	-5.30478e-05	4.6013e-05	2.10471e-06
MR0725_TraceCoords	G33	-0.0222943	-0.0233196	0.0132357	-0.000641191	-0.00042015	-0.00605087	-0.0010358	0.00140785	-5.71569e-05	-0.00107685	-0.000245134	0.00135003	0.00131333	0.000279257	0.0016347	-0.000618894	0.000172392	-4.27065e-05	-0.000157105	-7.69864e-05	2.88223e-05	4.89139e-05	7.39581e-05	-8.9806e-06
MR0726A_TraceCoords	G33	-0.0296523	0.0314952	0.00477053	0.0112058	-0.00359608	0.00256824	-0.000526085	-0.00440624	0.00264116	0.00241143	-0.00052484	-0.000422263	0.000571491	-0.000345618	-0.00154788	0.00022423	0.000233584	0.000273405	-0.000142485	-0.000811625	-0.000309772	-0.000458704	-6.90564e-05	2.80086e-06
MR0727_TraceCoords	G33	0.0755949	-0.00455854	-0.00550347	-0.0218734	0.00237558	-0.00270415	-0.00164537	0.00224222	0.00271941	0.0015478	0.000123577	-0.000550366	-0.000848702	-0.00140579	0.00154281	0.00139557	-9.35765e-05	0.000666119	0.000227988	-0.000819696	6.44905e-05	0.000798959	0.000134746	-3.90563e-06
MR0728_TraceCoords	G33	0.00627981	0.00818824	-0.00704382	0.00927697	-0.00849129	-0.00201918	0.00209598	-0.00270572	0.0026234	0.00110692	0.000144649	-0.000245747	0.000807467	-0.00110611	-0.000587931	-0.000482078	-0.000431855	-3.9034e-05	0.000104908	-0.000115644	1.95372e-05	0.000294644	-8.82503e-05	2.97496e-06
MR0731_TraceCoords	G33	0.0272725	-0.0227072	-0.0193447	-0.00843307	-0.00892091	-0.000745918	-0.00127272	-0.00453812	-0.000215973	-0.00224348	-0.00106513	-0.000562854	-0.00163702	0.000907844	-9.1313e-05	0.000750564	0.000646351	0.000800892	2.4661e-05	-0.000386856	0.00025537	0.000246441	0.000154173	-4.82304e-06
MR0732_TraceCoords	G33	0.106527	0.00819317	0.00183454	-0.0148292	0.0111826	0.00515555	-0.00416694	-0.000531624	0.0025917	-0.00109908	0.000106795	0.00213534	-0.0010141	-0.00420162	0.000467704	0.00106167	0.00218729	-0.000114211	0.00067982	0.000469239	-3.55665e-05	-0.000457549	-0.000283839	2.3949e-05
MR0738_TraceCoords	G33	0.0765637	-0.0247705	0.0124032	0.00108315	0.00587237	0.00292169	0.00451654	-0.00276691	-0.00386068	-0.00306077	-0.00134189	-0.000483302	-0.000370496	-0.00107687	-0.000422889	-0.000946595	0.000225601	-1.62781e-05	-0.000363516	0.000160192	-0.000231814	-0.000230499	0.000226576	-3.34236e-06
MR0743_TraceCoords	G33	0.0295286	0.0143288	-0.00833103	-0.00205505	-0.00715867	0.00377907	0.0019135	0.000769061	0.000593813	-0.00194578	0.00029892	0.00171675	-0.00199293	0.000302617	0.000307037	-0.000216776	-0.00017453	1.15231e-05	0.000426534	2.05031e-05	-3.09646e-05	9.52727e-05	-5.19445e-06	8.28421e-07
MR0745_TraceCoords	G33	-0.0224348	0.00312744	0.00162551	-0.0141395	-0.00425155	0.00190845	0.00154315	0.00283653	-0.000955771	0.000901074	-0.00122457	-0.000817193	-0.00182709	0.000100578	-6.24436e-05	-0.000393983	-0.000211769	-5.91385e-05	-1.76265e-05	-0.000366323	-8.38954e-05	0.000348536	-0.000148758	1.29317e-05
MR0746_TraceCoords	G33	-0.0069986	-0.0358251	0.00676602	0.000641549	-0.00187481	-0.0135848	0.0048376	-0.00112136	0.00175822	0.000278635	3.68836e-05	0.00213362	0.000946521	0.00110657	-0.00120373	-0.00088833	0.000228757	-0.00055647	0.000223364	2.95341e-05	-0.000322946	0.000294294	2.86328e-05	1.35507e-06
MR0747_TraceCoords	G33	-0.0328074	0.018593	0.00509692	-0.000881564	-0.00371589	0.00658222	0.00270351	0.00710327	-0.000533984	0.000841964	0.00246716	-0.00140378	0.000399199	-0.000565793	0.000665374	1.20281e-05	-0.000448927	-5.57631e-05	-0.000126948	-0.000268307	-0.000243707	0.000215361	-0.000136568	-1.42572e-05
MR0750_TraceCoords	G33	-0.0502506	-0.0341423	0.00190426	0.0104605	-0.00226246	-0.000226873	-0.00023583	0.00323181	0.00543129	0.00213797	-0.000527571	0.000993687	-0.0019727	0.000231904	0.00104625	0.000528809	-8.42487e-05	0.000257241	-0.000322135	-0.000262583	0.000275521	0.000219438	-9.36145e-05	3.19364e-06
MR0751_TraceCoords	G33	-0.0842918	0.00416279	-0.0132624	-0.0113575	-0.000912709	0.00217218	0.000444891	-0.00704537	-0.00543699	-0.00214831	-4.18228e-06	-0.000106425	-0.00078912	9.89909e-05	-1.42166e-06	-0.000608613	0.000373319	-0.000751299	0.00100528	0.00018733	0.000519906	0.000431054	0.000176486	9.14385e-06
MR0752_TraceCoords	G33	0.113824	-0.0068667	-0.0117431	0.0055783	0.00694114	-0.00450074	0.000799296	0.00361683	-0.00349543	-0.00334412	-0.00188622	-0.00119005	-0.000280042	0.000561445	-0.000838258	0.000257981	-0.000452449	1.16102e-05	0.000489709	-0.000855968	-0.000103802	-0.000119223	-0.000165095	-4.05286e-06
MR0754_TraceCoords	G33	0.0934576	-0.00326818	0.00249943	0.00755542	0.00578101	-0.00267313	0.00156009	-0.00548288	-0.00111477	-0.000632302	-0.00133644	-0.000224443	-0.000605955	-0.000936404	-0.00197194	-0.000862837	-0.000706406	-0.000485807	-0.000322561	0.000261974	-8.73752e-05	0.000262389	7.26221e-05	1.01247e-05
MR0760_TraceCoords	G33	0.00561332	-0.0211933	-0.000580164	0.00164718	-0.00603644	0.00109382	0.00291859	-0.00704675	-0.00183101	-0.000164771	-0.00057015	0.000845075	-0.00113828	0.000202373	-0.000292328	0.000162147	0.000168829	0.000293311	0.000104318	6.23647e-05	-0.000118942	0.000352724	-4.6626e-05	1.13817e-05
MR0763_TraceCoords	G33	0.0375961	0.0057812	0.0161524	0.00311572	0.000739133	-0.00298758	0.00523442	-0.00173486	0.000448411	-0.000812313	-0.00137062	0.000387303	-0.0019797	-0.000913835	-0.000593995	-0.000542317	-0.000962977	0.00026198	-0.000319838	0.00015414	-7.59313e-06	-0.000436948	1.97579e-05	-4.80711e-06
MR0765_TraceCoords	G33	0.103039	0.00167848	-0.0167713	-0.00184106	0.00317039	-0.0039741	0.0011404	0.000410595	0.000563696	-0.00181126	0.00303574	0.00133801	-0.000803733	-0.000123802	-0.00113655	0.000717952	-0.000439763	8.0221e-05	0.000896775	-3.58725e-05	0.000516695	-0.00046209	0.000462445	-1.20179e-05
MR0767_TraceCoords	G33	0.0153181	-0.0377172	-0.00145356	-0.00580255	-0.00393215	7.41755e-05	-0.00197403	-0.00217626	0.00102222	0.000132324	0.000265623	0.000412412	-0.000235963	0.000557525	-0.000357689	0.00140949	0.000663302	1.67398e-05	0.000353598	0.000317065	-0.00012853	-1.94868e-05	2.50786e-05	2.91901e-06
MR0769_TraceCoords	G33	-0.0313816	-0.016045	0.00337608	-0.0016167	-0.00338113	-0.00349298	-0.00227536	-0.00503715	0.00622428	0.00109118	-0.0019317	0.000406573	-0.000473671	0.00011046	-0.000322389	-0.000230007	0.000419699	-0.000135699	0.000205533	-9.12837e-05	0.000342521	-9.18965e-05	0.000122923	1.14706e-05
MR0770_TraceCoords	G33	-0.15571	-0.0290122	0.00277512	0.0250554	0.0228721	0.00361327	0.000336967	0.0045531	0.00325413	0.000115319	0.00198242	0.00513912	-0.000660877	-0.00143616	-0.000633948	0.00317428	-0.00099724	-0.000103306	-0.000983253	-1.3414e-05	-1.32111e-05	0.000440605	0.000154903	-3.1226e-06
MR0773_TraceCoords	G33	0.0244475	0.0176495	-0.00163123	0.0124602	-0.00583597	-0.000683862	-0.00192997	0.000650257	0.000972714	0.00215586	0.000380585	-0.000142372	0.00101049	-0.000579185	-0.000777181	-9.23849e-05	0.000142816	-0.000389911	9.02906e-05	2.47076e-06	8.61084e-05	0.000344945	0.000148489	7.53145e-06
MR0778_TraceCoords	G33	0.107116	-0.0452128	-0.00573427	0.0298749	0.00851483	-0.00419855	0.000265258	-0.00137096	-0.00144365	-0.00115476	-0.00222706	-0.00693055	0.000300427	0.00204321	-0.000879061	-0.00175088	-0.000144314	-0.00126365	0.00109672	-0.000670469	0.000346207	0.000769048	0.000426591	1.83452e-05
MR0781_TraceCoords	G33	-0.00811678	-0.0281805	-0.00533895	-0.00391729	-0.00744481	0.0128946	0.00106588	-0.000128766	0.00023151	0.000259691	-0.0019445	-3.01875e-05	6.42618e-05	0.0019423	0.00114626	0.00076272	0.00012961	0.000928061	-0.00039105	0.00042567	0.000260292	0.000147288	4.3455e-05	1.0456e-05
MR0783_TraceCoords	G33	-0.0588088	-0.00402165	0.000558656	-0.00500317	-0.00139858	-0.00174973	-0.00437562	-0.000813854	-0.00184816	0.00130616	0.000609171	0.000742369	2.3655e-05	-0.000166618	0.00102062	-0.000843021	0.000100243	0.00013371	0.000447923	-0.000277039	0.000181287	0.000266555	0.000199569	-8.91179e-06
MR0784_TraceCoords	G33	0.140489	0.000788197	-0.00842562	0.00170018	0.0166771	-0.00237307	0.00133161	-0.00243475	0.00110914	0.00433524	0.00127699	-0.000698532	-0.00149377	0.00135854	0.00034287	-0.000747857	-0.00102668	-0.000248525	-0.00101706	0.000252708	0.00105218	-2.31562e-05	-1.15369e-05	-4.58058e-06
MR0787_TraceCoords	G33	0.0285527	-0.00497857	-0.00785647	0.00715686	-0.00825465	0.00269223	0.00915659	-0.00192151	-0.00415274	0.00153527	-0.000733731	0.000848068	0.000372559	-0.00102631	0.000558183	0.000420975	-4.21577e-05	0.000525837	3.58187e-05	-0.000133753	0.00011984	3.52287e-05	-3.09674e-05	1.28858e-06
MR0788_TraceCoords	G33	0.0562256	-0.0529119	0.000339453	0.00449978	0.00269655	-0.010575	-0.00411881	-0.0102633	-0.00171923	-1.40017e-06	-0.0021862	-0.000596627	-0.00239386	0.0019175	-0.000156766	0.000697887	-5.79335e-05	-0.000242208	0.000163565	-0.000461635	-0.00024309	0.000233766	-0.000423543	-6.62385e-06
MR0790_TraceCoords	G33	0.0465708	0.00625578	0.00216279	-0.00649112	-0.00172344	-0.00631547	0.00438062	-0.000622558	-0.0018737	-0.000303525	0.00126277	-0.000320185	-0.000345264	-0.00103145	-0.000893893	0.000673129	-0.0011541	9.21405e-05	0.000317687	5.02065e-05	0.000117193	-2.68979e-05	0.000152693	-2.8194e-06
MR0793_TraceCoords	G33	0.0441282	-0.0191904	0.00896696	0.00117422	-0.000321557	0.00186798	-0.00117099	-0.00080039	0.000954618	-0.0010901	-0.00237542	-0.000543043	0.00184226	-0.00113117	0.000400645	0.000514247	0.00040672	-0.000132545	4.8779e-06	9.0742e-05	-2.94889e-05	0.000146411	-1.46809e-05	1.37824e-05
MR0794_TraceCoords	G33	0.0434717	-0.00148923	-0.00524285	0.0148225	-0.00596715	0.000374364	0.00140574	-3.35233e-05	0.00305365	0.000552266	-0.000255433	0.000174342	-3.69571e-06	-0.000410685	1.91238e-05	-0.000333344	-0.00014595	-0.000127625	0.000188789	-0.000207966	0.000497194	-4.19472e-05	-0.000189349	1.68953e-05
MR0795_TraceCoords	G33	-0.100509	0.0184811	-0.00265781	0.0218013	0.00400412	-0.00692225	0.00371515	-0.000915428	-0.00148523	0.00416898	-0.0015397	0.000672072	-0.00143568	-0.00204406	0.000387714	0.00337458	0.00135231	0.000231184	-3.7938e-06	0.000350508	-0.000505525	0.000285297	0.000351352	-1.68394e-05
MR0802_TraceCoords	G33	-0.0878123	-0.0131744	0.00046792	0.00541202	0.00297539	-0.00172041	-0.0061514	0.000611311	-0.000719011	-0.00398148	0.00319964	-0.000116756	0.000285174	-0.000946225	0.000607583	0.000351029	-8.42644e-06	0.00020022	-0.000167877	-0.00032853	0.000369183	-1.61541e-05	-0.000209417	6.48031e-06
MR0803_TraceCoords	G33	0.0346338	0.0250342	0.00377097	0.00662396	-0.00321848	0.00500938	-0.000202851	0.00108089	0.00155093	0.000518314	-0.00116691	0.00134985	-0.00121236	-0.000544827	-0.00133942	-0.00119099	0.000124612	0.000457566	-0.000252376	-0.000185572	-0.000381414	-4.90329e-06	-0.000361796	-1.98931e-06
MR0805_TraceCoords	G33	-0.0127438	-0.0082158	0.017657	0.000461317	-0.000519511	0.00546727	-0.002284	0.00146055	-0.00221952	-0.000543601	-0.00318777	0.00117603	-0.00038421	-0.000840251	-0.00029428	8.27639e-05	6.00623e-05	-8.84524e-05	0.000288522	-3.87842e-06	-0.000148032	-0.000140118	-7.9695e-05	4.70002e-06
MR0809_TraceCoords	G33	-0.0959731	-0.0235901	0.00357789	0.00313545	0.00594405	-0.00249613	-0.00139397	-9.12418e-06	-0.000393669	0.00264681	0.00194761	0.00220512	0.000188182	7.25717e-05	-0.00085955	-0.00044356	-0.000428504	5.22118e-05	0.000344111	0.000271448	-0.000440332	4.54432e-06	-9.30969e-05	2.11629e-05
MR0810_TraceCoords	G33	0.0171416	-0.0269387	-0.0156426	0.00667811	-0.00972181	0.000472913	8.06863e-06	-0.00191252	0.000341738	0.00149985	-0.00082539	-0.000986756	-0.000901781	0.00106461	-0.000738855	0.000564001	0.000406543	0.000339296	0.000102251	-0.000303578	0.000111583	0.000203341	-0.000104745	-6.39806e-06
MR0811_TraceCoords	G33	0.0181033	-0.0119286	-0.00281588	-0.0177177	-0.00376582	-0.00198113	-0.00632953	-0.00410766	0.00220462	-0.0052069	0.00119403	0.000103696	-0.000564285	-0.000722038	4.29266e-05	0.000988256	0.000449283	-8.7174e-05	0.000190247	-0.000677326	0.000321769	-0.000962721	0.000205048	-6.46583e-06
MR0813_TraceCoords	G33	0.0449786	-0.0353566	0.0065822	0.0105763	-4.76872e-05	-0.00373597	-0.00286032	0.00116316	-0.000966872	0.001272	-0.000141415	-0.00219998	0.000192186	0.000258522	0.000315155	0.00055519	0.000269616	-0.000243687	0.000833366	-0.000240728	0.000533293	9.48375e-05	2.66762e-06	-2.21637e-06
MR0815_TraceCoords	G33	0.1261	-0.00569251	-0.0127895	-0.0134811	0.0133704	-0.0126548	7.14008e-05	-0.00511679	-0.00108055	-0.0023891	0.000762677	0.00122061	0.000943391	-0.00165205	0.000557806	0.00301085	-0.00180004	-0.00147873	-0.00133106	0.000278655	-0.000281409	-0.000430844	0.000280766	-5.26414e-06
MR0817_TraceCoords	G33	-0.00545222	-0.0294843	0.0129862	-0.000299986	-0.000960094	0.00153061	-0.00120313	0.0012423	-0.000812441	-0.00063281	0.00390139	0.000620423	-0.00154914	-0.000241807	0.000533746	0.00021666	0.000463797	-0.000212277	0.000390734	0.000431739	-0.000122031	-0.000188132	7.67766e-05	-6.50821e-06
MR0818_TraceCoords	G33	-0.00547075	-0.00944519	0.00264394	-0.00876754	-0.00438159	0.000633168	-0.00221343	0.00611253	0.004844	0.00142665	0.00277995	-0.00195541	0.000665418	-0.00131138	-0.000401818	-0.000377612	0.000219969	6.33316e-06	0.000387611	-0.00019677	-0.000272041	0.000100747	4.53601e-05	-6.44313e-06
MR0820_TraceCoords	G33	-0.0216361	0.0107943	0.000452837	-0.00256677	-0.00615451	0.00311125	0.00988997	0.00186729	5.54591e-05	-0.00336052	-0.0022298	9.42856e-05	0.000976922	-0.000116838	0.000724407	9.4264e-05	-0.000635662	-0.000550309	0.000275171	-0.000207224	-0.000303173	0.000473651	-0.00021148	6.89744e-06
MR0821_TraceCoords	G33	-0.0159516	-0.0119533	0.0117707	0.00164617	-0.00177497	-0.00130257	-0.00618934	0.00385726	0.00400767	-0.000690319	-2.5709e-05	-0.000337579	0.00193108	-0.000152755	0.00136236	-0.000473736	0.00024956	0.000145331	-0.000241799	-0.000340265	0.000372109	-1.20772e-07	6.79871e-06	1.33721e-05
MR0823_TraceCoords	G33	0.141323	-0.00905255	-0.0126634	-0.00264416	0.016349	-0.00116116	0.000118584	-0.0040132	-0.00298323	0.00113819	-0.000557836	0.00149788	0.0010389	-0.000170638	0.000579869	0.00153086	-0.000304867	-0.000822216	-0.00100895	-0.000163444	5.74896e-05	0.000301627	0.000283189	4.30645e-06
MR0827_TraceCoords	G33	-0.00303057	-0.0257774	-0.0138256	-0.0130547	-0.00859455	0.00429896	0.00246452	0.0012289	-0.00705417	-0.0018202	-0.00113987	-0.00242983	0.0023216	0.000875813	-0.00132747	8.03733e-05	0.000547347	0.000338755	0.000280312	0.000326476	-0.000606972	-0.000113827	0.000487176	-3.30859e-06
MR0828_TraceCoords	G33	0.0347248	0.00869382	0.0108915	0.00940463	-0.0013613	-0.00388912	0.000571775	0.00341027	0.00440971	0.00166543	-0.001253	-0.00167992	0.00093116	-0.00116386	-2.22323e-05	0.000246193	-0.000539674	0.000168926	8.14071e-05	0.000134171	0.000413086	4.42279e-05	-1.06442e-05	2.02517e-06
MR0829_TraceCoords	G33	0.0303682	0.00448461	-0.00565405	0.00599424	-0.00718874	0.00454736	0.00220943	0.0024833	-0.00140522	-0.00204324	0.00264737	0.000138995	-0.000215819	-0.000250125	0.0001793	-0.000422813	4.58104e-05	-1.29608e-05	0.000212054	-0.000198866	-0.000244037	0.000136251	0.000388337	-7.91126e-06
MR0837_TraceCoords	G33	0.0110634	0.0218054	0.00588164	0.00849077	-0.00432205	0.00281062	0.000302671	0.00265523	-0.000612144	-0.00160079	-0.000269671	0.000823116	-0.000453685	-0.000930391	-0.000285781	-0.000114124	-0.00015627	0.00064516	-5.71063e-05	-0.000155229	0.000168794	-2.92045e-05	-0.000191969	-2.04146e-05
MR0839_TraceCoords	G33	0.0991392	-0.0038796	0.00873954	-0.012063	0.0110039	0.0023719	-0.00125781	-0.00422953	-0.00318583	-0.000734629	0.000973797	0.000635609	-0.00159636	-0.0025518	0.000451601	0.000865573	8.42429e-05	-0.000944535	-0.000874456	0.000365611	-0.00010181	-0.000159251	0.000253656	-6.91153e-06
MR0841_TraceCoords	G33	0.049275	-0.0102635	-0.00411051	0.0123483	-0.00425683	0.000455769	-0.00245601	-0.000622685	-0.000218755	-0.00239132	-0.00229284	0.00026092	-0.000136008	-0.00140937	0.000566918	6.30129e-05	0.000217075	-0.000435616	0.000320113	-0.000177465	-6.46666e-05	0.000168142	0.000134975	6.81453e-10
MR0842_TraceCoords	G33	-0.088932	0.00174878	0.00234485	-0.00126112	0.00282152	0.0131158	0.00193069	0.00613585	-0.00463513	-9.91179e-05	-0.00140591	-0.00161465	-0.000882096	-0.000422765	0.00105002	-0.00177731	-0.00123906	-0.000728838	-0.000307207	0.000364666	-0.000173781	-4.38258e-05	0.00020559	2.21997e-05
MR0844_TraceCoords	G33	0.00590434	-0.0147444	0.0173486	-0.00781798	0.00017053	0.00689318	-0.00190767	0.00642686	0.0039973	0.000782461	0.0030649	-0.000692351	-0.00120594	-0.00146337	-0.000604665	0.000123811	0.00108313	-0.000281382	0.000997833	-3.5076e-05	0.000101842	0.000350963	0.000355796	-5.70832e-06
MR0847_TraceCoords	G33	-0.0395477	-0.0495643	-0.00641229	-0.00135948	-0.00291262	0.00130181	-0.00539631	-0.000106482	-0.0023343	0.0021293	-0.000360592	0.00282211	-0.000804594	0.00104213	-0.0012757	0.000958251	-0.00115427	-9.01616e-06	0.0003938	0.000382468	0.000376835	-0.000307625	4.16174e-05	1.60864e-07
MR0851_TraceCoords	G33	-0.004371	-0.0170387	-0.0140499	0.00567679	-0.0104608	0.00484478	1.79981e-05	-0.000203425	0.00183956	0.000284192	-0.00133996	0.000111063	-0.00149831	0.000195094	-0.000114391	0.000784377	0.000248528	0.000335234	-3.60709e-05	-0.000306721	6.91507e-05	0.000327152	-0.000111253	1.37752e-06
MR0853_TraceCoords	G33	0.0240798	-0.00608828	-0.00395915	-0.0135628	-0.0047734	-0.00427986	0.000769865	-0.00327979	0.000992089	0.000246595	-0.000240608	0.00120311	-0.00242683	-0.00078294	-0.00137698	0.00153789	0.00014451	-0.000365481	0.000135873	0.000351852	4.88969e-05	5.04882e-05	-6.32777e-05	7.64656e-06
MR0860_TraceCoords	G33	-0.00808256	-0.0181471	0.00739115	-0.000215658	-0.00342763	0.00797452	-0.00439737	0.00424171	-0.00735387	0.00246626	-0.00231373	-6.50074e-06	0.00164969	-0.000488532	-0.000196109	2.49576e-05	-0.000229862	-0.000105806	0.000401949	-0.000114505	-3.48014e-05	-2.38084e-05	-1.94631e-05	1.04236e-05
MR0863_TraceCoords	G33	-0.0594341	-0.0112643	0.00255463	0.00646686	-0.00219316	0.00234394	7.42321e-05	-0.00222646	0.000683906	0.00119387	0.000645593	0.000625914	-0.0013358	-5.21753e-05	0.00107851	0.000668894	-0.000197266	0.00043697	0.000101149	-1.54946e-05	0.000137301	0.000398837	-0.000169508	-1.19297e-05
MR0864_TraceCoords	G33	-0.00161991	0.00151158	0.00400941	-0.000309992	-0.00346235	-0.0150038	-0.00427355	0.00159391	0.00382052	-0.00382795	-0.00257436	-0.00156689	0.00221607	-0.00047711	-0.000543897	0.000130301	-0.000227531	-0.000144425	-0.00012276	0.000169653	2.80577e-05	0.000144754	-0.000254509	-7.53206e-06
MR0865_TraceCoords	G33	-0.0582997	0.0171386	-0.0183033	-0.00980943	-0.0054295	-0.0101114	0.00258578	0.000170503	-0.00269752	-0.00174362	-0.00153948	-0.00125636	0.00156768	-0.00227951	0.000952814	-0.000544891	0.000600422	-0.000222257	0.000393027	0.000172478	0.000249742	-0.000387181	-0.000130586	-3.59379e-06
MR0867_TraceCoords	G33	0.150386	-0.00487695	-0.015653	0.00769033	0.0179684	-0.00639808	0.00269465	0.00355241	-0.00181887	0.00201967	0.000856175	-0.00160433	-0.000642698	0.00217085	0.00114515	0.000289611	-0.00180161	-0.00038446	0.00049642	-0.000502038	0.000485501	-0.000265683	0.000369771	5.86098e-06
[truncated: 322 more rows]
